# Supplementary material for: Characterization of the adult Aedes aegypti early midgut peritrophic matrix proteome using LC-MS
Source: PLoS One. 2018 Mar 23;13(3):e0194734. doi: 10.1371/journal.pone.0194734 (PMC5865745; doi:10.1371/journal.pone.0194734)
Supplement: S1 Table — Master counts (Tab 1) for 474 PM-associated proteins. Column headings include: Vectorbase gene ID (AaegL3.3), Interpro description, Interpro ID, GO terms, isoelectic point (IEP), predicted molecular weight (mw), max score, protein ID, # unique peptides, # total peptides, % sequence coverage, false discovery rate level (FDR), predicted cleavage site (SignalP), Total intensity and intensity in extracts A, B and C, bloodfed (BF) and sugar-fed (SF) mRNAseq counts from Bonizonni et al (2011). Table also includes raw peptide data (Peptide IDs; Tab 2), identified proteins per fraction (Tab 3), as well as subsets of predicted secreted proteins (Tab 3), salivary proteins (Tab 4) and An. gambiae 1:1 orthologs (Tab 5). (XLSX) [file pone.0194734.s003.xlsx]

## Sheet: Master Counts
VectorBase Gene Stable ID	# AA	Vectorbase description	Interpro Description	Interpro ID	GO terms	IEP	mw	Max score	Accession	Unique peptides	Unique Peptides/100a.a.	Total Peptides	Total Peptides/100 a.a.	Sequence coverage	FDR level	Cleavage site (SignalP)	Transmembrane (TMHMM) domain	SupA	SupB	SupC	Total Intensity	BF	SF	Transcript Length	BF/1000bp	SF/1000	log2FC	log10_BFtranscripts	log10SFtranscripts	log10(SF*BF)	log10peptides
AAEL006424	321	37 kDa salivary gland allergen Aed a 2 Precursor (Protein D7)(Allergen Aed a 2)	PBP_GOBP	IPR006170	GO:0005576;GO:0005549	7.72	37465.4	12514.2	AAEL006424-PA	41	12.7726	60	18.6916	68.22	0	SignalP-noTM		165455	76079.3	36143.2	277677	3831	3691	1474	2599.05	2504.07	0.0537093	3.58331	3.39865	6.81346	1.27165
AAEL003957	148		ADF-H;ADF/Cofilin;ADF-H/Gelsolin-like_dom	IPR002108;IPR017904;IPR029006	GO:0005622;GO:0015629;GO:0003779;GO:0030042	7.02	17333.6	7805.4	AAEL003957-PA	16	10.8108	22	14.8649	67.57	0			47424.7	27767	21226.5	96418.2	3156	2369	1330	2372.93	1781.2	0.413819	3.49914	3.25071	6.626	1.17216
AAEL001872	282	voltage-dependent anion-selective channel	Porin_Euk;Porin_Euk/Tom40	IPR001925;IPR027246	GO:0055085;GO:0008308;GO:0005741;GO:0098656	8.87	30810.3	16459.1	AAEL001872-PA	28	9.92908	39	13.8298	83.33	0			33222.5	132583	78950.3	244755	5123	4236	2000	2561.5	2118	0.274286	3.70952	3.32593	6.73442	1.14082
AAEL004112	192	Thioredoxin Peroxidase.	AhpC/TSA;Thioredoxin-like_fold;Thioredoxin_domain;Peroxiredoxin_C;Peroxiredoxin_AhpC-typ	IPR000866;IPR012336;IPR013766;IPR019479;IPR024706	GO:0016491;GO:0055114;GO:0045454;GO:0004601;GO:0051920;GO:0016209;GO:0005623	5.57	21608.6	6319.89	AAEL004112-PA	12	6.25	20	10.4167	63.02	0			27506.2	27020.8	29564.7	84091.7	4713	1564	579	8139.9	2701.21	1.59141	3.6733	3.43156	7.34218	1.01773
AAEL012062	861	Na+/K+ ATPase alpha subunit	P_typ_ATPase;ATPase_P-typ_cation-transptr_N;P-type_ATPase_IIC;ATPase_P-typ_cation-transptr_C;ATPase_P-typ_transduc_dom_A;ATPase_P-typ_P_site;HAD-like_dom;ATPase_P-typ_TM_dom;ATPase_P-typ_cyto_domN	IPR001757;IPR004014;IPR005775;IPR006068;IPR008250;IPR018303;IPR023214;IPR023298;IPR023299	GO:0005524;GO:0016021;GO:0046872;GO:0006813;GO:0006814;GO:0000166;GO:0005391	5.34	115852	9508.49	AAEL012062-PB	61	7.08479	85	9.87224	54.73	0		TMhelix	46213.5	102477	66449.8	215140	6192	20786	11802	524.657	1761.23	-1.74713	3.79183	3.24582	5.96569	0.994416
AAEL005901	224	40S ribosomal protein S3a [Source:UniProtKB/Swiss-Prot;Acc:Q1HRR3]	Ribosomal_S3Ae;Ribosomal_S3Ae_CS;Ribosomal_S1/3_euk	IPR001593;IPR018281;IPR027500	GO:0003735;GO:0006412;GO:0005622;GO:0005840;GO:0022627	10.15	25653.6	1817.42	AAEL005901-PA	14	6.25	22	9.82143	45.54	0			20013	16543.8	28316.6	64873.3	9903	11825	823	12032.8	14368.2	-0.255903	3.99577	4.1574	8.23777	0.992175
AAEL008787	614	V-type proton ATPase catalytic subunit A (V-ATPase subunit A)(EC 3.6.3.14)(Vacuolar proton pump subunit alpha)(V-ATPase 69 kDa subunit)	ATPase_F1/V1/A1_a/bsu_nucl-bd;ATPase_F1/V1/A1_a/bsu_N;ATPase_V1-cplx_asu;ATPase_a/bsu_AS;V-ATPase_asu;ATPase_F1/V1_b/a_C;P-loop_NTPase;ATP-synth_a_Xtn	IPR000194;IPR004100;IPR005725;IPR020003;IPR022878;IPR024034;IPR027417;IPR031686	GO:0005524;GO:0015991;GO:0046961;GO:0015992;GO:0046034;GO:0033180	5.08	68571.2	5870.96	AAEL008787-PA	39	6.35179	60	9.77199	71.66	0			15748.5	29543.7	38563.9	83856.1	4910	4803	3108	1579.79	1545.37	0.0317872	3.69108	3.18903	6.38763	0.989983
AAEL005772	138	odorant binding protein OBP22	PBP_GOBP	IPR006170	GO:0005549	5.52	16208.4	5122.62	AAEL005772-PA	10	7.24638	13	9.42029	63.77	0	SignalP-noTM		41251.5	26121.7	16863.7	84236.8	408	953	730	558.904	1305.48	-1.22391	2.61066	3.11577	5.86311	0.974064
AAEL008485	259		DUF1397	IPR009832		4.7	29662.3	15394.8	AAEL008485-PA	18	6.94981	24	9.26641	62.93	0	SignalP-noTM		74379.3	32467.6	10630.5	117477	320	519	1061	301.602	489.161	-0.697663	2.50515	2.68945	5.16889	0.966911
AAEL013775	281					4.71	31656.2	11188.7	AAEL013775-PA	17	6.04982	26	9.25267	65.84	0	SignalP-noTM		75633.7	57023.2	80743.2	213400	664	5329	1017	652.901	5239.92	-3.00461	2.82217	3.71932	6.53417	0.966267
AAEL013885	158		MBF2	IPR031734		4.61	17155.3	22621.7	AAEL013885-PA	9	5.6962	14	8.86076	53.16	0	SignalP-noTM		77521	93807.5	236309	407637	375	1546	928	404.095	1665.95	-2.04358	2.57403	3.22166	5.82814	0.947471
AAEL003434	600	alpha-amylase	Glyco_hydro_13_cat_dom;Glycoside_hydrolase_SF	IPR006047;IPR017853	GO:0005975;GO:0003824	5.13	68698.6	4201.46	AAEL003434-PA	36	6	53	8.83333	52.67	0	SignalP-noTM		41534.2	60935.2	19115.2	121585	432	2069	3018	143.141	685.553	-2.25983	2.63548	2.83604	4.99181	0.946125
AAEL005179	139					4.87	14388.7	13802	AAEL005179-PA	9	6.47482	12	8.63309	59.71	0			12049.1	14681.2	30446.3	57176.5	233	747	951	245.005	785.489	-1.68078	2.36736	2.89514	5.28432	0.936166
AAEL004500	844	eukaryotic translation elongation factor	EFG_V;TF_GTP-bd_dom;EFTu-like_2;Small_GTP-bd_dom;Transl_elong_EFG/EF2_IV;Transl_B-barrel;EFG_III-V;Ribosomal_S5_D2-typ_fold_subgr;Ribosomal_S5_D2-typ_fold;P-loop_NTPase;G_TR_CS	IPR000640;IPR000795;IPR004161;IPR005225;IPR005517;IPR009000;IPR009022;IPR014721;IPR020568;IPR027417;IPR031157	GO:0003924;GO:0005525;GO:0003746	5.95	95362.5	3496.77	AAEL004500-PA	50	5.92417	72	8.53081	56.75	0			81640	50859	31108.4	163607	37139	76918	5614	6615.43	13701.1	-1.05039	4.56983	4.13676	7.95731	0.93099
AAEL006417	332	D7 protein, putative	PBP_GOBP	IPR006170	GO:0005549	9.55	39198.1	4484.86	AAEL006417-PA	20	6.0241	28	8.43373	47.59	0	SignalP-noTM		31007.3	12015.3	35929.1	78951.7	2971	2623	1817	1635.11	1443.59	0.179731	3.4729	3.15944	6.37299	0.92602
AAEL002827	504	ATP synthase beta subunit	ATPase_F1/V1/A1_a/bsu_nucl-bd;AAA+_ATPase;ATPase_F1/V1/A1_a/bsu_N;ATP_synth_F1_bsu;ATPase_a/bsu_AS;ATPase_F1/V1_b/a_C;P-loop_NTPase	IPR000194;IPR003593;IPR004100;IPR005722;IPR020003;IPR024034;IPR027417	GO:0005524;GO:0046933;GO:0015986;GO:0045261;GO:0015992;GO:0046034	4.84	53912	10154.9	AAEL002827-PA	27	5.35714	42	8.33333	60.71	0			10476.2	17803.3	80814.1	109094	11943	35119	2586	4618.33	13580.4	-1.55609	4.07711	4.13291	7.7974	0.920819
AAEL009760	150	Niemann-Pick Type C-2, putative	ML_dom;Ig_E-set	IPR003172;IPR014756		8.55	16504.1	10223.8	AAEL009760-PA	9	6	12	8	55.33	0	SignalP-noTM		45172.8	28688.7	21280.4	95141.9	299	1651	671	445.604	2460.51	-2.46512	2.47567	3.39102	6.03997	0.90309
AAEL003734	803	aconitase, mitochondrial	AconitaseA/IPMdHydase_ssu_swvl;Acoase/IPM_deHydtase_lsu_aba;Aconitase_mito-like;Aconitase/3IPM_dehydase_swvl;Acnase/IPM_dHydase_lsu_aba_1/3;Aconitase/IPMdHydase_lsu_aba_2;Aconitase_4Fe-4S_BS	IPR000573;IPR001030;IPR006248;IPR015928;IPR015931;IPR015932;IPR018136	GO:0046872;GO:0051539;GO:0005739;GO:0008152;GO:0006099;GO:0003994	8.47	88189.3	9195.57	AAEL003734-PA	49	6.10212	64	7.97011	62.27	0			78209.3	32110.5	30751.2	141071	1014	1242	3030	334.653	409.901	-0.292608	3.00604	2.61268	5.13727	0.901464
AAEL013353	126	Profilin [Source:UniProtKB/TrEMBL;Acc:Q16JE9]	PFN;Profilin_CS	IPR005455;IPR027310	GO:0005856;GO:0003779	5.52	13887.8	2215.52	AAEL013353-PA	6	4.7619	10	7.93651	48.41	0			25390.7	17564.2	17937.4	60892.2	2949	1442	2309	1277.18	624.513	1.03215	3.46967	2.79554	5.90179	0.899629
AAEL006704	354	fibrinogen and fibronectin	Fibrinogen_a/b/g_C_dom;Fibrinogen_a/b/g_C_2;Fibrinogen_a/b/g_C_1	IPR002181;IPR014715;IPR014716		5.5	40871.7	14904.6	AAEL006704-PA	18	5.08475	28	7.9096	63.28	0	SignalP-noTM		74504.3	63650.8	219284	357439	5234	9863	1171	4469.68	8422.72	-0.914113	3.71883	3.92545	7.57573	0.898155
AAEL017096	463	Elongation factor 1-alpha [Source:UniProtKB/TrEMBL;Acc:Q1HR88]	TF_GTP-bd_dom;Transl_elong_EFTu/EF1A_C;EFTu-like_2;Transl_elong_EF1A_euk/arc;Transl_B-barrel;Transl_elong_EF1A/Init_IF2_C;P-loop_NTPase;G_TR_CS	IPR000795;IPR004160;IPR004161;IPR004539;IPR009000;IPR009001;IPR027417;IPR031157	GO:0003924;GO:0005525;GO:0005737;GO:0003746;GO:0006414	9.44	50815.3	9768.2	AAEL017096-PA	26	5.61555	36	7.77538	54.21	0			21375.7	24426.3	54989.4	100791	46692	103590	1392	33543.1	74418.1	-1.14964	4.66924	4.87168	9.39728	0.890722
AAEL012175	551	ATP synthase alpha subunit mitochondrial	ATPase_F1/V1/A1_a/bsu_nucl-bd;ATP_synth_asu_C;ATPase_F1/V1/A1_a/bsu_N;ATP_synth_F1_asu;ATPase_a/bsu_AS;ATP_synth_asu-like;P-loop_NTPase;ATP_synth_F1_a	IPR000194;IPR000793;IPR004100;IPR005294;IPR020003;IPR023366;IPR027417;IPR033732	GO:0032559;GO:0005524;GO:0046933;GO:0015986;GO:0045261;GO:0015992;GO:0046034	9.23	59563.6	7025.85	AAEL012175-PA	28	5.08167	42	7.6225	51.36	0			12875.8	15971.8	67026	95873.7	16031	38166	2698	5941.81	14146	-1.25142	4.20496	4.15063	7.92455	0.882098
AAEL004369	641	alpha-glucosidase	Glyco_hydro_31;Glycoside_hydrolase_SF	IPR000322;IPR017853	GO:0005975;GO:0004553	5.54	73860.6	3961.91	AAEL004369-PA	32	4.9922	48	7.4883	54.91	0	SignalP-noTM		66065.8	60654.8	34687.4	161408	2324	6372	2320	1001.72	2746.55	-1.45514	3.36624	3.43879	6.43954	0.874383
AAEL004457	108	cytochrome c	Cyt_c_1A/1B;Cyt_c-like_dom	IPR002327;IPR009056	GO:0009055;GO:0055114;GO:0046872;GO:0005739;GO:0020037;GO:0070469	9.88	11874.6	16233.5	AAEL004457-PA	7	6.48148	8	7.40741	41.67	0			25871.3	11426.7	3104	40402	6653	6410	1275	5218.04	5027.45	0.0536807	3.82302	3.70135	7.41886	0.869666
AAEL004855	302	ADP,ATP carrier protein	Mit_carrier;Aden_trnslctor;Mitochondrial_sb/sol_carrier;Mt_carrier_dom	IPR002067;IPR002113;IPR018108;IPR023395	GO:0016021;GO:0005215;GO:0006810;GO:0005743;GO:0055085	9.96	33237.4	20616	AAEL004855-PA	20	6.62252	22	7.28477	58.28	0		TMhelix	7604.25	8992.83	66958.4	83555.5	24983	41029	1723	14499.7	23812.5	-0.715697	4.39764	4.37681	8.53816	0.862416
AAEL011758	206	peptidyl-prolyl cis-trans isomerase f, ppif	Cyclophilin-type_PPIase_dom;Cyclophilin-type_PPIase_CS;Cyclophilin-type_PPIase;Cyclophilin-like_dom	IPR002130;IPR020892;IPR024936;IPR029000	GO:0006457;GO:0003755;GO:0000413	9.28	22653.6	5009.24	AAEL011758-PA	10	4.85437	15	7.28155	56.8	0			83659.3	47145.8	15612.3	146417	6925	6402	1714	4040.26	3735.12	0.113291	3.84042	3.5723	7.17871	0.862224
AAEL004930	276	carbonic anhydrase	Carbonic_anhydrase_a;Carbonic_anhydrase_a-class_CS;Carbonic_anhydrase_a-class	IPR001148;IPR018338;IPR023561	GO:0008270;GO:0004089;GO:0006730	5.69	31649.4	5709.21	AAEL004930-PA	17	6.15942	20	7.24638	75.36	0			51845.7	45629.8	49031.2	146507	899	4290	2742	327.863	1564.55	-2.25458	2.95376	3.19439	5.71008	0.860121
AAEL010464	428	glutamate dehydrogenase	Glu/Leu/Phe/Val_DH;Glu/Leu/Phe/Val_DH_C;Glu/Leu/Phe/Val_DH_dimer_dom;Glu_DH;NAD(P)-bd_dom;Glu/Leu/Phe/Val_DH_AS;NAD_bind_Glu_DH	IPR006095;IPR006096;IPR006097;IPR014362;IPR016040;IPR033524;IPR033922	GO:0016491;GO:0055114;GO:0006520;GO:0016639;GO:0004352	6.45	46979.4	5476.77	AAEL010464-PC	23	5.37383	31	7.24299	57.01	0			7957.33	6407.83	39640.6	54005.8	6622	4755	3393	1951.67	1401.41	0.477822	3.82099	3.14657	6.43697	0.859918
AAEL011905	1034	myosin i	Myosin_head_motor_dom;Myosin_TH1;P-loop_NTPase	IPR001609;IPR010926;IPR027417	GO:0005524;GO:0003774;GO:0016459	9.21	120958	3891.13	AAEL011905-PA	55	5.31915	74	7.15667	55.22	0			116852	67164.8	52647.9	236665	1039	5751	4157	249.94	1383.45	-2.46862	3.01662	3.14096	5.5388	0.854711
AAEL000667	583	alpha-amylase	Glyco_hydro_13_cat_dom;Glycoside_hydrolase_SF	IPR006047;IPR017853	GO:0005975;GO:0003824	5.2	67228.9	7829.7	AAEL000667-PB	28	4.80274	41	7.03259	50.77	0	SignalP-noTM	TMhelix	86671.2	69224.2	59451.1	215346	3043	5592	1858	1637.78	3009.69	-0.87787	3.4833	3.47852	6.69278	0.847115
AAEL008006	315	3-hydroxyacyl-coa dehyrogenase	3HC_DH_C;3-OHacyl-CoA_DH_NAD-bd;3-OHacyl-CoA_DH_CS;6-PGluconate_DH_C-like;6PGD_dom_2;NAD(P)-bd_dom;3-OHacyl-CoA_DH	IPR006108;IPR006176;IPR006180;IPR008927;IPR013328;IPR016040;IPR022694	GO:0016491;GO:0055114;GO:0070403;GO:0003857;GO:0006631	5.86	35353.9	5395.63	AAEL008006-PA	18	5.71429	22	6.98413	58.73	0		TMhelix	7733.17	18546.7	35673.9	61953.7	574	1214	948	605.485	1280.59	-1.08065	2.75891	3.10741	5.88951	0.844112
AAEL013221	217	60S ribosomal protein L10a	Ribosomal_L1;Ribosomal_L1_CS;Ribosomal_L1-like;Ribosomal_L1/biogenesis	IPR002143;IPR023673;IPR023674;IPR028364	GO:0003735;GO:0006412;GO:0005840;GO:0003723;GO:0015934	10.26	24838.4	3328.39	AAEL013221-PC	10	4.60829	15	6.91244	37.79	0			56707.2	26770.2	14150	97627.4	15179	21256	865	17548	24573.4	-0.485793	4.18124	4.39047	8.63469	0.839632
AAEL011180	290		DM9_repeat;DUF3421	IPR006616;IPR024518		6.54	31246.9	19731.1	AAEL011180-PA	15	5.17241	20	6.89655	91.38	0			22485.5	63378.8	96008.8	181873	1254	2433	1115	1124.66	2182.06	-0.956199	3.0983	3.33887	6.38989	0.838632
AAEL001593	356	Glycerol-3-phosphate dehydrogenase [NAD(+)] [Source:UniProtKB/TrEMBL;Acc:Q17KS4]	G3P_DH_NAD-dep_C;G3P_DH_NAD-dep;6-PGluconate_DH_C-like;G3P_DH_NAD-dep_N;6PGD_dom_2;NAD(P)-bd_dom;G3P_DH_NAD-dep_euk	IPR006109;IPR006168;IPR008927;IPR011128;IPR013328;IPR016040;IPR017751	GO:0005975;GO:0016491;GO:0055114;GO:0006072;GO:0009331;GO:0042803;GO:0051287;GO:0016616;GO:0004367;GO:0046168	6.49	38748	2441.91	AAEL001593-PC	16	4.49438	24	6.74157	61.14	0			18258.8	12263.2	22930.8	53452.8	2696	2957	2036	1324.17	1452.36	-0.133314	3.43072	3.16207	6.28402	0.828761
AAEL012778	1000	protease m1 zinc metalloprotease	Peptidase_M1;Peptidase_M1_N;ERAP1-like_C_dom;M1_APN-typ	IPR001930;IPR014782;IPR024571;IPR034016	GO:0008270;GO:0006508;GO:0004177;GO:0008237;GO:0016021	4.95	102210	10233.7	AAEL012778-PB	48	4.8	67	6.7	58.69	0	SignalP-noTM	TMhelix	109500	111916	66763.5	288179	390	2105	3116	125.16	675.546	-2.43227	2.59106	2.82965	4.92712	0.826075
AAEL008192	243	40S ribosomal protein S3	Ribosomal_S3_C;KH_dom_type_2;Ribosomal_S3_euk/arc;KH_prok-type;KH_dom-like_a/b;Ribosomal_S3_CS	IPR001351;IPR004044;IPR005703;IPR009019;IPR015946;IPR018280	GO:0003735;GO:0006412;GO:0005840;GO:0003723;GO:0015935	9.33	28548.2	5765.94	AAEL008192-PB	12	4.93827	16	6.58436	49.22	0			23906.3	18881.3	29316.9	72104.6	12133	18992	927	13088.5	20487.6	-0.646456	4.08397	4.31149	8.42838	0.818514
AAEL009244	274	serine-type enodpeptidase,	Trypsin_dom;Peptidase_S1A;Peptidase_S1_PA;TRYPSIN_HIS	IPR001254;IPR001314;IPR009003;IPR018114	GO:0006508;GO:0004252	9.06	29438.2	16335	AAEL009244-PA	14	5.10949	18	6.56934	60.95	0	SignalP-noTM	TMhelix	18533.5	22703.3	97324.9	138562	1660	3365	1032	1608.53	3260.66	-1.01942	3.22011	3.51331	6.71973	0.817522
AAEL012359	168	nucleoside-diphosphate kinase NBR-A, putative	Nucleoside_diP_kinase;Nucleoside_diP_kinase_AS;NDK-like_dom	IPR001564;IPR023005;IPR034907	GO:0005524;GO:0004550;GO:0006183;GO:0006228;GO:0006241;GO:0006165	9.16	18512.6	941.563	AAEL012359-PA	8	4.7619	11	6.54762	45.24	0	SignalP-noTM		5860	4319.83	6570.06	16749.9	5378	5388	718	7490.25	7504.18	-0.0026801	3.73062	3.8753	7.7498	0.816083
AAEL000726	291	fibrinogen and fibronectin	Fibrinogen_a/b/g_C_dom;Fibrinogen_a/b/g_C_2;Fibrinogen_a/b/g_C_1	IPR002181;IPR014715;IPR014716		5.99	33918.2	6798.4	AAEL000726-PA	15	5.15464	19	6.52921	45.7	0	SignalP-noTM		69094.2	41520.2	15296.2	125911	382	821	1032	370.155	795.543	-1.10381	2.58206	2.90066	5.46905	0.814861
AAEL015683	123	Histone H2B [Source:UniProtKB/TrEMBL;Acc:Q17ES2]	Histone_H2B;Histone_H2A/H2B/H3;Histone-fold	IPR000558;IPR007125;IPR009072	GO:0003677;GO:0005634;GO:0000786;GO:0046982	10.66	13627.9	12601.8	AAEL015683-PA	7	5.69106	8	6.50407	35.77	0			45418.7	12108.2	15860.6	73387.4	1	0	372	2.68817	0		0			0.813185
AAEL003872	171	translationally-controlled tumor protein homolog (TCTP)	Mss4-like;Translation_control_tumour_CS;Translational_control_tumour_p;TCTP	IPR011057;IPR018103;IPR018105;IPR034737	GO:0005737	4.46	19716.3	7470.39	AAEL003872-PA	10	5.84795	11	6.43275	80.12	0			15525.2	21742.8	24524	61792	11555	12895	1410	8195.04	9145.39	-0.158295	4.06277	3.9612	7.87475	0.808397
AAEL001005	407	calreticulin	Calret/calnex;Calreticulin/calnexin_P_dom;Calreticulin;ConA-like_dom;Calret/calnex_CS	IPR001580;IPR009033;IPR009169;IPR013320;IPR018124	GO:0005509;GO:0005783;GO:0006457;GO:0051082;GO:0005515	4.22	47012.6	1941.06	AAEL001005-PA	17	4.1769	26	6.38821	57.74	0	SignalP-noTM		23605.3	14273	9238.06	47116.4	4066	1191	2732	1488.29	435.944	1.77144	3.60917	2.63943	5.81212	0.805379
AAEL001964	126	protein serine/threonine kinase, putative	OS_D_A10/PebIII	IPR005055		8.57	14777.8	1161.85	AAEL001964-PA	5	3.96825	8	6.34921	45.24	0	SignalP-noTM		32220.3	37195.2	33783.7	103199	1076	2829	726	1482.09	3896.69	-1.39461	3.03181	3.5907	6.76157	0.802719
AAEL018102	142		PBP_GOBP	IPR006170	GO:0005549	5.25	16552.5	5742.7	AAEL018102-PA	7	4.92958	9	6.33803	37.32	0	SignalP-noTM	TMhelix	30456	12385.5	8351.42	51192.9
AAEL000641	494	protein disulfide isomerase	Disulphide_isomerase;Prot_disulphide_isomerase;Thioredoxin-like_fold;Thioredoxin_domain;Thioredoxin_CS	IPR005788;IPR005792;IPR012336;IPR013766;IPR017937	GO:0016853;GO:0005783;GO:0045454;GO:0003756	4.76	56295.7	2097.01	AAEL000641-PA	25	5.06073	31	6.2753	46.36	0	SignalP-noTM		30879.3	20038.5	17366.3	68284.1	19644	5710	3402	5774.25	1678.42	1.78253	4.29323	3.2249	6.9864	0.797635
AAEL014583	112	60S acidic ribosomal protein P2 [Source:UniProtKB/TrEMBL;Acc:Q1HRM9]	Ribosomal_L12	IPR027534	GO:0003735;GO:0005622;GO:0005840;GO:0006414	4.34	11343.6	2025.47	AAEL014583-PA	4	3.57143	7	6.25	35.71	0			16474.3	15069	10858.4	42401.7	19789	18016	515	38425.2	34982.5	0.13542	4.29642	4.54385	9.12847	0.79588
AAEL009081	530					6.23	58634.5	7789.56	AAEL009081-PA	24	4.5283	33	6.22642	55.47	0	SignalP-noTM		23820.2	42939.8	50899.8	117660	4030	5001	1694	2378.98	2952.18	-0.311437	3.60531	3.47014	6.84654	0.794238
AAEL007765	386	Serine Protease Inhibitor (serpin) likely cleavage at K/R. Transcript A.	Serpin_fam;Serpin_dom;Serpin_CS	IPR000215;IPR023796;IPR023795	GO:0005615	5.43	42510	2364.42	AAEL007765-PB	15	3.88601	24	6.21762	39.14	0		TMhelix	31942.7	24703.7	18245.9	74892.2	717	475	1161	617.571	409.13	0.594046	2.85552	2.61186	5.40255	0.793624
AAEL009185	355	arginine or creatine kinase	ATP-guanido_PTrfase;Gln_synth/guanido_kin_cat_dom;ATP-guanido_PTrfase_N;ATP-guanido_PTrfase_cat;ATP-guanido_PTrfase_AS	IPR000749;IPR014746;IPR022413;IPR022414;IPR022415	GO:0005524;GO:0003824;GO:0016772;GO:0016301	5.95	40216.5	6162.83	AAEL009185-PA	19	5.35211	22	6.19718	51.55	0			60356.3	44028	65568.3	169953	6040	11668	1123	5378.45	10390	-0.949937	3.78104	4.01662	7.74727	0.792194
AAEL014292	130	40S ribosomal protein S24 [Source:UniProtKB/TrEMBL;Acc:Q8WQK7]	Ribosomal_S24e;Ribosomal_L23/L15e_core_dom;Ribosomal_S24e_CS	IPR001976;IPR012678;IPR018098	GO:0003735;GO:0006412;GO:0005622;GO:0005840	11.57	15178.1	5124.92	AAEL014292-PA	4	3.07692	8	6.15385	33.08	0			10751.7	6927.83	14115.9	31795.4	470	706	592	793.919	1192.57	-0.587007	2.6721	3.07648	5.97626	0.789147
AAEL009467	163		ADF-H;ADF-H/Gelsolin-like_dom	IPR002108;IPR029006	GO:0005622;GO:0003779	4.76	18674.3	4600	AAEL009467-PA	9	5.52147	10	6.13497	48.47	0			27246.2	26095.7	32174.4	85516.2	132	462	492	268.293	939.024	-1.80735	2.12057	2.97268	5.40129	0.787812
AAEL016984	332	Glyceraldehyde-3-phosphate dehydrogenase [Source:UniProtKB/TrEMBL;Acc:J9HYM2]	Glyceraldehyde-3-P_DH_1;NAD(P)-bd_dom;GlycerAld_3-P_DH_NAD(P)-bd;GlycerAld_3-P_DH_cat;GlycerAld_3-P_DH_AS;GlycerAld/Erythrose_P_DH	IPR006424;IPR016040;IPR020828;IPR020829;IPR020830;IPR020831	GO:0006096;GO:0055114;GO:0050661;GO:0051287;GO:0006006;GO:0016620;GO:0004365	8.37	35611.8	5638.9	AAEL016984-PA	16	4.81928	20	6.0241	58.13	0			61999.2	44881.2	49006.5	155887	10028	22817	1608	6236.32	14189.7	-1.18608	4.00121	4.15197	7.9469	0.779892
AAEL005428	117		MBF2	IPR031734		10.08	12970.1	2158.27	AAEL005428-PA	6	5.12821	7	5.98291	32.48	0	SignalP-noTM	TMhelix	23809.3	22959.5	11741.6	58510.4	490	639	899	545.05	710.79	-0.383034	2.6902	2.85174	5.58818	0.776912
AAEL005435	473	mitochondrial processing peptidase beta subunit	Pept_M16_Zn_BS;Peptidase_M16_C;Metalloenz_LuxS/M16;Pept_M16_N	IPR001431;IPR007863;IPR011249;IPR011765	GO:0006508;GO:0003824;GO:0046872;GO:0004222	5.82	52876.8	2483.82	AAEL005435-PA	18	3.8055	28	5.91966	47.78	0			16597.8	19678.3	41075.9	77352.1	4591	11244	1776	2585.02	6331.08	-1.29228	3.66191	3.80148	7.21394	0.772297
AAEL006485	338	inosine-uridine preferring nucleoside hydrolase	Inosine/uridine_hydrolase_dom;Inosine/uridine_hydrolase	IPR001910;IPR023186	GO:0016787	4.74	38220.9	10464.4	AAEL006485-PA	12	3.5503	20	5.91716	36.69	0	SignalP-noTM		75089	38781.1	12738.2	126608	975	1861	1151	847.089	1616.85	-0.932604	2.989	3.20867	6.1366	0.772113
AAEL000749	290		Fibrinogen_a/b/g_C_dom;Fibrinogen_a/b/g_C_2;Fibrinogen_a/b/g_C_1	IPR002181;IPR014715;IPR014716		5.67	33496.7	11741.5	AAEL000749-PA	13	4.48276	17	5.86207	36.9	0	SignalP-noTM		69964.3	35516.7	17095.3	122576	434	880	1535	282.736	573.29	-1.01981	2.63749	2.75837	5.20976	0.768051
AAEL000757	308	anterior fat body protein	SMP-30;6-blade_b-propeller_TolB-like;SGL	IPR005511;IPR011042;IPR013658		5.57	33959.3	2690.65	AAEL000757-PB	14	4.54545	18	5.84416	48.7	0			36927.7	17838.2	8410.83	63176.7	273	329	1226	222.675	268.352	-0.269187	2.43616	2.42871	4.77638	0.766722
AAEL000490	103	Histone H4 [Source:UniProtKB/TrEMBL;Acc:Q16IE4]	Histone_H4;TAF_TATA-bd;Histone-fold;Histone_H4_CS	IPR001951;IPR004823;IPR009072;IPR019809	GO:0003677;GO:0005634;GO:0000786;GO:0006352;GO:0006334;GO:0046982	11.77	11381.4	4647.29	AAEL000490-PA	5	4.85437	6	5.82524	40.78	0			25624.8	7302.67	8256.89	41184.4	0	0	676	0	0					0.765314
AAEL008620	311	D7 protein, putative	PBP_GOBP	IPR006170	GO:0005549	5.04	35780.9	1901.02	AAEL008620-PA	14	4.50161	18	5.78778	44.37	0	SignalP-noTM		18208.7	7726.33	5591.33	31526.3	644	560	6919	93.077	80.9366	0.201634	2.80889	1.90814	3.87699	0.762512
AAEL011288	432	elongation factor 1 gamma	Transl_elong_EF1_G_con;Glutathione_S-Trfase_N;GST_C;Glutathione-S-Trfase_C-like;Thioredoxin-like_fold	IPR001662;IPR004045;IPR004046;IPR010987;IPR012336	GO:0003746;GO:0006414;GO:0005515	7.77	49168	2132.66	AAEL011288-PA	20	4.62963	25	5.78704	50.93	0			16431.3	12937.2	18179.2	47547.7	10715	13357	1745	6140.4	7654.44	-0.317964	4.02999	3.88391	7.67211	0.762456
AAEL002956	467	Probable citrate synthase 1, mitochondrial Precursor (EC 2.3.3.1)	Citrate_synthase;Citrate_synthase_euk;Citrate_synth-like_lrg_a-sub;Citrate_synth-like_sm_a-sub;Citrate_synthase_AS	IPR002020;IPR010109;IPR016142;IPR016143;IPR019810	GO:0005975;GO:0005759;GO:0006099;GO:0004108;GO:0006101;GO:0046912	9.07	51884.8	7383.38	AAEL002956-PA	23	4.92505	27	5.78158	50.75	0			15699.5	10269.9	45207.4	71176.9	121	282	3086	39.2093	91.3804	-1.22069	2.08279	1.96085	3.55424	0.762047
AAEL008848	297	ATP synthase gamma subunit	ATP_synth_F1_gsu;ATP_synth_F1_gsu_CS	IPR000131;IPR023632	GO:0046933;GO:0015986;GO:0045261	9.13	33036.2	5643.17	AAEL008848-PA	11	3.7037	17	5.72391	34.01	0			10418.3	10236.2	32725.6	53380.1	4150	10438	1275	3254.9	8186.67	-1.33066	3.61805	3.91311	7.42565	0.757692
AAEL010821	315	60S ribosomal protein LP0	Ribosomal_L10P;L10E_eukaryotes	IPR001790;IPR030670	GO:0005622;GO:0005840;GO:0042254	5.3	33890	2328.17	AAEL010821-PA	14	4.44444	18	5.71429	41.27	0			66186.7	42746.3	13131.4	122064	27043	27736	1302	20770.4	21302.6	-0.0365045	4.43205	4.32843	8.64588	0.756962
AAEL006347	562	Apyrase Precursor (EC 3.6.1.5)(Adenosine diphosphatase)(ATP-diphosphohydrolase)(ATP-diphosphatase)(ADPase)(Allergen Aed a 1)	Calcineurin-like_PHP_ApaH;5'-Nucleotdase_CS;5_nucleotidase/apyrase;5'-Nucleotdase_C;Metallo-depent_PP-like	IPR004843;IPR006146;IPR006179;IPR008334;IPR029052	GO:0005524;GO:0016787;GO:0046872;GO:0005576;GO:0000166;GO:0016788;GO:0009166;GO:0102490	8.2	63210.4	2480.64	AAEL006347-PA	22	3.91459	32	5.69395	42.35	0	SignalP-noTM		36089.5	16869	41023.9	93982.4	1437	1442	1781	806.85	809.657	-0.0050111	3.15746	2.9083	5.81509	0.755414
AAEL006096	389	Gelsolin precursor	Villin/Gelsolin;Gelsolin-like_dom;ADF-H/Gelsolin-like_dom;Gelsolin	IPR007122;IPR007123;IPR029006;IPR030004	GO:0005509;GO:0051015;GO:0045010;GO:0051016;GO:0003779;GO:0051014	9.44	43105	6209.3	AAEL006096-PA	15	3.85604	22	5.65553	43.96	0	SignalP-noTM	TMhelix	44110.2	21290.7	13492	78892.8	193	698	1170	164.957	596.581	-1.85463	2.28556	2.77567	4.99304	0.752473
AAEL006885	248	14-3-3 protein zeta [Source:UniProtKB/Swiss-Prot;Acc:Q1HR36]	14-3-3;14-3-3_CS;14-3-3_domain	IPR000308;IPR023409;IPR023410	GO:0019904;GO:0005737	4.58	28341.7	3547.96	AAEL006885-PA	9	3.62903	14	5.64516	41.13	0			14729.7	12135.7	12028.7	38894	2204	2709	747	2950.47	3626.51	-0.297636	3.34321	3.55949	7.02938	0.751676
AAEL002399	429	Aspartate aminotransferase [Source:UniProtKB/TrEMBL;Acc:Q5K6H3]	Asp_trans;NHTrfase_class1_PyrdxlP-BS;Aminotransferase_I/II;PyrdxlP-dep_Trfase_sub2;PyrdxlP-dep_Trfase	IPR000796;IPR004838;IPR004839;IPR015422;IPR015424	GO:0003824;GO:0030170;GO:0008483;GO:0006520;GO:0009058;GO:0004069;GO:0080130	9.26	47718.5	2508.51	AAEL002399-PA	17	3.9627	24	5.59441	59.44	0			7315.5	5825.5	24115.2	37256.2	1593	1604	2087	763.297	768.567	-0.00992787	3.20222	2.88568	5.76838	0.747754
AAEL009658	621	alpha,alpha-trehalase	Glyco_hydro_37;6-hairpin_glycosidase-like;Glyco_hydro_37_CS	IPR001661;IPR008928;IPR018232	GO:0016021;GO:0003824;GO:0004555;GO:0005991	4.99	67353.2	2432.25	AAEL009658-PB	27	4.34783	34	5.47504	50.26	0	SignalP-TM	TMhelix	41944.5	43831.7	29918.7	115695	1173	1268	2274	515.831	557.608	-0.112352	3.0693	2.74633	5.45884	0.738387
AAEL006425	275	trypsin	Trypsin_dom;Peptidase_S1A;Peptidase_S1_PA;TRYPSIN_HIS;TRYPSIN_SER	IPR001254;IPR001314;IPR009003;IPR018114;IPR033116	GO:0006508;GO:0004252	8.27	29646.3	3555.88	AAEL006425-PA	13	4.72727	15	5.45455	60.73	0	SignalP-noTM		29547.7	35997.3	29639.9	95184.9	613	13305	970	631.959	13716.5	-4.43994	2.78746	4.13724	6.93793	0.736759
AAEL001965	441	imaginal disc growth factor	Glyco_hydro18_cat;Chitinase_II;Glycoside_hydrolase_SF;Chitinase_insertion	IPR001223;IPR011583;IPR017853;IPR029070	GO:0005975;GO:0008061	6.13	48940.6	5206.72	AAEL001965-PA	18	4.08163	24	5.44218	51.47	0	SignalP-noTM		48820.5	51980.7	28999.7	129801	722	1843	2635	274.004	699.431	-1.35199	2.85854	2.84474	5.2825	0.735773
AAEL003427	148	40S ribosomal protein S16 [Source:UniProtKB/Swiss-Prot;Acc:P62251]	Ribosomal_S9;Ribosomal_S5_D2-typ_fold_subgr;Ribosomal_S5_D2-typ_fold;Ribosomal_S9_CS	IPR000754;IPR014721;IPR020568;IPR020574	GO:0003735;GO:0006412;GO:0005840	10.6	16862.7	1338.65	AAEL003427-PA	5	3.37838	8	5.40541	34.46	0			14272.5	16005.5	14488.1	44766.1	14631	16692	673	21740	24802.4	-0.190128	4.16527	4.39449	8.73175	0.732828
AAEL009151	130	40S ribosomal protein S15a	Ribosomal_S8	IPR000630	GO:0003735;GO:0006412;GO:0005840	10.41	14829.4	1875.07	AAEL009151-PA	6	4.61538	7	5.38462	48.46	0			13265	11575.2	17964.1	42804.3	10832	12497	766	14141	16314.6	-0.206282	4.03471	4.21258	8.36306	0.731155
AAEL012326	149	calmodulin	EF_hand_dom;EF-hand-dom_pair;EF_Hand_1_Ca_BS	IPR002048;IPR011992;IPR018247	GO:0005509	3.88	16810.6	3033.4	AAEL012326-PA	6	4.02685	8	5.36913	50.34	0			19602.7	16665.3	2836	39104	1319	1505	450	2931.11	3344.44	-0.190319	3.12024	3.52432	6.99136	0.729904
AAEL000647	615		Glyco_hydro_13_cat_dom;Glycoside_hydrolase_SF	IPR006047;IPR017853	GO:0005975;GO:0016021;GO:0003824	5.8	71384.6	8773.32	AAEL000647-PA	28	4.55285	33	5.36585	42.76	0	SignalP-noTM	TMhelix	74898.2	100030	35328.8	210257	1993	4757	2118	940.982	2245.99	-1.25511	3.29951	3.35141	6.32499	0.729639
AAEL000951	224	elongation factor 1-beta2	Transl_elong_EF1B_B/D_CS;Glutathione-S-Trfase_C-like;EF1B_bsu/dsu_GNE;Transl_elong_EF1B/ribosomal_S6;EF-1_beta_acid_region_euk	IPR001326;IPR010987;IPR014038;IPR014717;IPR018940	GO:0003746;GO:0006414;GO:0005853	5.58	22339.5	794.344	AAEL000951-PB	8	3.57143	12	5.35714	46.04	0			13383.8	11052.3	16147.1	40583.2	4232	5283	967	4376.42	5463.29	-0.320018	3.62655	3.73745	7.37857	0.728933
AAEL002023	441	imaginal disc growth factor	Glyco_hydro18_cat;Chitinase_II;Glycoside_hydrolase_SF;Chitinase_insertion	IPR001223;IPR011583;IPR017853;IPR029070	GO:0005975;GO:0008061	8.3	48312.9	2549.03	AAEL002023-PA	20	4.53515	23	5.21542	56.92	0	SignalP-noTM		31496.3	18538.7	9151.28	59186.3	2324	3579	1808	1285.4	1979.54	-0.622946	3.36624	3.29656	6.4056	0.717289
AAEL011195	211	mitochondrial phosphate carrier protein	Mitochondrial_sb/sol_carrier;Mt_carrier_dom	IPR018108;IPR023395	GO:0016021;GO:0006810	9.24	23538.8	5488.96	AAEL011195-PA	8	3.79147	11	5.21327	22.75	0			1040.5	5321	34699.4	41060.9	6207	9740	1134	5473.54	8589.07	-0.650026	3.79288	3.93395	7.67221	0.71711
AAEL000293	921	ebna2 binding protein P100	Tudor;Staphylococal_nuclease_OB-fold;Silence_cplx_Nase-comp_TudorSN	IPR002999;IPR016071;IPR016685	GO:0031047;GO:0016442	7.06	104005	1042.78	AAEL000293-PA	32	3.47448	48	5.21173	42.24	0			31294.8	15088.2	38548.4	84931.4	7841	3797	3896	2012.58	974.589	1.04618	3.89437	2.98882	6.29257	0.716982
AAEL005085	116	60S ribosomal protein L30 [Source:UniProtKB/TrEMBL;Acc:Q1HR35]	Ribosomal_L30e;Ribosomal_L7Ae/L30e/S12e/Gad45;Ribosomal_L30e_CS;L30e-like	IPR000231;IPR004038;IPR022991;IPR029064	GO:0003735;GO:0006412;GO:0005622;GO:0005840	10.03	13014.1	2808.59	AAEL005085-PA	4	3.44828	6	5.17241	34.48	0			37968.2	12731.3	12441.7	63141.2	685	796	608	1126.64	1309.21	-0.216664	2.83569	3.11701	6.1688	0.713693
AAEL013069	311	guanine nucleotide-binding protein subunit beta-like protein	WD40_repeat;WD40/YVTN_repeat-like_dom;WD40_repeat_dom;WD40_repeat_CS;G-protein_beta_WD-40_rep	IPR001680;IPR015943;IPR017986;IPR019775;IPR020472	GO:0016301;GO:0005515	7.8	35404.8	6028.78	AAEL013069-PA	13	4.18006	16	5.14469	44.05	0			19345.8	25162.7	44189	88697.5	17795	33622	1160	15340.5	28984.5	-0.917934	4.2503	4.46217	8.64801	0.71136
AAEL002158	216	secreted ferritin G subunit precursor, putative	Ferritin;Ferritin_DPS_dom;Ferritin-like_diiron;Ferritin-like_SF;Ferritin-rel	IPR001519;IPR008331;IPR009040;IPR009078;IPR012347	GO:0008199;GO:0006826;GO:0006879;GO:0004322;GO:0005623	5.58	24314.4	5246.02	AAEL002158-PA	7	3.24074	11	5.09259	30.56	0	SignalP-noTM		46636.5	16770.8	6952.33	70359.7	1402	2179	1063	1318.91	2049.86	-0.63618	3.14675	3.31172	6.43194	0.706939
AAEL001668	433	enolase	Enolase;Enolase_CS;Enolase_C;Enolase_N;Enolase_N-like;Enolase_C-like;Enolase-like_superfamily	IPR000941;IPR020809;IPR020810;IPR020811;IPR029017;IPR029065;IPR034390	GO:0006096;GO:0046872;GO:0000287;GO:0004634;GO:0000015	6.29	46906.5	4753.41	AAEL001668-PA	16	3.69515	22	5.08083	45.27	0			66214.5	37272.7	22549.7	126037	4733	10752	1774	2667.98	6060.88	-1.18378	3.67514	3.78254	7.20872	0.705935
AAEL006576	336	clip-domain serine protease, putative	Trypsin_dom;Peptidase_S1A;Peptidase_S1_PA;TRYPSIN_HIS;TRYPSIN_SER	IPR001254;IPR001314;IPR009003;IPR018114;IPR033116	GO:0006508;GO:0004252	5.67	37389	2034.24	AAEL006576-PA	12	3.57143	17	5.05952	53.87	0	SignalP-noTM		21156.3	20883.5	22998.2	65038.1	23	157	1103	20.8522	142.339	-2.77106	1.36173	2.15332	3.47248	0.70411
AAEL000859	534		DUF753	IPR008472		4.83	60718.8	4454.26	AAEL000859-PA	22	4.11985	27	5.05618	43.26	0	SignalP-noTM		52699.3	64431	22735.9	139866	10311	457	2446	4215.45	186.836	4.49585	4.0133	2.27146	5.8963	0.703823
AAEL011704	715	heat shock protein	Hsp90_fam;HATPase_C;Heat_shock_protein_90_CS;Ribosomal_S5_D2-typ_fold;Hsp90_N	IPR001404;IPR003594;IPR019805;IPR020568;IPR020575	GO:0005524;GO:0006457;GO:0051082;GO:0006950	4.75	81876.7	2841.6	AAEL011704-PA	25	3.4965	36	5.03497	37.62	0			30028.3	20648.2	23708.3	74384.8	1489	265	2605	571.593	101.727	2.49028	3.17289	2.00744	4.76453	0.701996
AAEL005766	363	Fructose-bisphosphate aldolase [Source:UniProtKB/TrEMBL;Acc:Q178U8]	FBA_I;Aldolase_TIM;Aldolase_I_AS	IPR000741;IPR013785;IPR029768	GO:0006096;GO:0003824;GO:0004332	8.17	39997.5	2222.26	AAEL005766-PB	13	3.58127	18	4.95868	33.52	0			31683.5	18236.2	16140.1	66059.8	12131	12574	1784	6799.89	7048.21	-0.0517452	4.0839	3.84808	7.68058	0.695366
AAEL012614	323	NADP-specific isocitrate dehydrogenase	Isocitrate_DH_NADP;IsoPropMal-DH-like_dom	IPR004790;IPR024084	GO:0055114;GO:0000287;GO:0051287;GO:0016616;GO:0006099;GO:0004450;GO:0006102	8.68	37207.5	2940.07	AAEL012614-PA	13	4.02477	16	4.95356	43.96	0			11550	12392.8	25025.8	48968.7	195	1455	972	200.617	1496.91	-2.89947	2.29003	3.1752	5.47757	0.694917
AAEL005270	144		DM9_repeat;DUF3421	IPR006616;IPR024518	GO:0016740	4.71	15581.3	16426.7	AAEL005270-PA	7	4.86111	7	4.86111	91.67	0			41448.2	36317.2	58905.1	136670	477	1764	830	574.699	2125.3	-1.88679	2.67852	3.32742	6.08686	0.686736
AAEL002542	247	Triosephosphate isomerase [Source:UniProtKB/TrEMBL;Acc:Q17HW3]	Triosephosphate_isomerase;Aldolase_TIM;Triosephosphate_isomerase_AS;TrioseP_Isoase_bac/euk	IPR000652;IPR013785;IPR020861;IPR022896	GO:0006096;GO:0003824;GO:0008152;GO:0004807;GO:0006094;GO:0006098	5.94	26721.3	1744.89	AAEL002542-PA	10	4.04858	12	4.8583	50.2	0			21118.7	19616.5	20539.2	61274.4	1336	2338	1179	1133.16	1983.04	-0.807355	3.12581	3.29733	6.35162	0.686484
AAEL006674	374	Clip-Domain Serine Protease family B.	Trypsin_dom;Peptidase_S1A;Peptidase_S1_PA;TRYPSIN_HIS;CLIP;TRYPSIN_SER	IPR001254;IPR001314;IPR009003;IPR018114;IPR022700;IPR033116	GO:0006508;GO:0004252	5.04	42897.5	1814.01	AAEL006674-PA	12	3.20856	18	4.81283	38.24	0	SignalP-noTM		21976.3	15431.8	6770.83	44179	442	645	1125	392.889	573.333	-0.545253	2.64542	2.75841	5.35268	0.682401
AAEL009872	544	alanine aminotransferase	Aminotransferase_I/II;PyrdxlP-dep_Trfase_major_sub1;PyrdxlP-dep_Trfase_sub2;PyrdxlP-dep_Trfase	IPR004839;IPR015421;IPR015422;IPR015424	GO:0003824;GO:0030170;GO:0009058	8.23	60490.7	2165.73	AAEL009872-PA	16	2.94118	26	4.77941	33.27	0			13946.3	10485	18215.9	42647.3	1851	2585	2986	619.893	865.707	-0.481859	3.26741	2.93737	5.72969	0.679374
AAEL005524	461	Adenosylhomocysteinase [Source:UniProtKB/TrEMBL;Acc:Q179S1]	Adenosylhomocysteinase-like;Ado_hCys_hydrolase_NAD-bd;NAD(P)-bd_dom;S-Ado-L-homoCys_hydrolase_CS	IPR000043;IPR015878;IPR016040;IPR020082	GO:0006730;GO:0004013	6.28	52049.6	1470.58	AAEL005524-PA	19	4.12148	22	4.77223	53.8	0			10998.2	12694.7	8603.28	32296.1	416	1966	1494	278.447	1315.93	-2.24061	2.61909	3.11923	5.56398	0.678722
AAEL007818	252	Trypsin 3A1 Precursor (EC 3.4.21.4)	Trypsin_dom;Peptidase_S1A;Peptidase_S1_PA;TRYPSIN_HIS;TRYPSIN_SER	IPR001254;IPR001314;IPR009003;IPR018114;IPR033116	GO:0006508;GO:0004252;GO:0005615;GO:0007586	5.21	27122.5	4809.91	AAEL007818-PA	9	3.57143	12	4.7619	61.9	0	SignalP-noTM		59316.8	37773.3	20794.8	117885	914	128957	877	1042.19	147043	-7.14048	2.96095	5.16745	8.18539	0.677781
AAEL006928	508	dihydrolipoamide dehydrogenase	Pyr_nucl-diS_OxRdtase_dimer;Lipoamide_DH;Pyr_OxRdtase_I_AS;FAD/NAD-linked_Rdtase_dimer;FAD/NAD-binding_dom	IPR004099;IPR006258;IPR012999;IPR016156;IPR023753	GO:0016491;GO:0055114;GO:0050660;GO:0016668;GO:0045454;GO:0004148;GO:0005623	6.37	54172.8	730.143	AAEL006928-PA	15	2.95276	24	4.72441	38.19	0.0029			20692.2	15011.2	10119.7	45823	2328	4431	2417	963.177	1833.26	-0.928541	3.36698	3.26323	6.24693	0.674348
AAEL013139	192	GTPase_rho	Small_GTPase;Small_GTPase_Rho;Small_GTP-bd_dom;P-loop_NTPase	IPR001806;IPR003578;IPR005225;IPR027417	GO:0005622;GO:0016020;GO:0003924;GO:0005525;GO:0007264	6.94	21944.3	589.986	AAEL013139-PA	6	3.125	9	4.6875	36.46	0.0053			8305.83	11281	5332.5	24919.3	2043	1289	1618	1262.67	796.663	0.664437	3.31027	2.90127	6.00256	0.670941
AAEL012950	407	NADH-ubiquinone oxidoreductase 42 kda subunit	NDUFA10;P-loop_NTPase;DNK_dom	IPR015828;IPR027417;IPR031314	GO:0055114;GO:0006120;GO:0005759;GO:0005747;GO:0070469	5.5	47340.9	939.952	AAEL012950-PA	11	2.7027	19	4.6683	37.1	0			21394.3	14296.4	24978.6	60669.3	1323	3628	1467	901.84	2473.07	-1.45536	3.12156	3.39324	6.34837	0.669159
AAEL004434	627	transketolase	Transketolase_N;Transketolase-like_Pyr-bd;Transketo_C/PFOR_II;Transketolase_BS;THDP-binding;Transketolase_C	IPR005474;IPR005475;IPR009014;IPR020826;IPR029061;IPR033248	GO:0003824;GO:0008152	6.55	68503.9	754.961	AAEL004434-PA	20	3.18979	29	4.6252	42.11	0.0029			11418.3	10435.7	22454.2	44308.2	3980	5932	2346	1696.5	2528.56	-0.57575	3.59988	3.40287	6.63243	0.66513
AAEL005610	238	mitochondrial ATP synthase b chain	ATP_synth_Bsub_B/MI25;ATP_synth_F0_suB	IPR008688;IPR013837	GO:0015986;GO:0015078;GO:0000276	9.14	27211.3	2648.36	AAEL005610-PA	8	3.36134	11	4.62185	34.03	0			0	0	19491.9	19491.9	3926	8744	1583	2480.1	5523.69	-1.15523	3.59395	3.74223	7.1367	0.664816
AAEL013359	347	DEAD box ATP-dependent RNA helicase	RNA-helicase_DEAD-box_CS;Helicase_C;DEAD/DEAH_box_helicase_dom;Helicase_ATP-bd;RNA_helicase_DEAD_Q_motif;P-loop_NTPase	IPR000629;IPR001650;IPR011545;IPR014001;IPR014014;IPR027417	GO:0005524;GO:0003676;GO:0004386;GO:0003743	5.44	39493.2	1007.53	AAEL013359-PA	12	3.45821	16	4.61095	37.46	0			11560.2	8732.17	20517.2	40809.6	12650	19243	2787	4538.93	6904.56	-0.605196	4.10209	3.83914	7.49609	0.663791
AAEL005821	934	alanyl aminopeptidase	Peptidase_M1;Peptidase_M1_N;ERAP1-like_C_dom;M1_APN-typ	IPR001930;IPR014782;IPR024571;IPR034016	GO:0008270;GO:0006508;GO:0004177;GO:0008237	4.98	107673	4515.77	AAEL005821-PA	33	3.53319	43	4.60385	43.36	0	SignalP-noTM		42141.5	56358.5	16487.9	114988	2936	1019	2900	1012.41	351.379	1.5267	3.46776	2.54578	5.55113	0.663122
AAEL002704	417	Serine Protease Inhibitor (serpin) homologue	Serpin_fam;Serpin_dom	IPR000215;IPR023796	GO:0005615	6.26	48181.7	4627.81	AAEL002704-PB	16	3.83693	19	4.55635	41.25	0	SignalP-noTM		97860.2	39672.2	19471.3	157004	752	909	1254	599.681	724.88	-0.273548	2.87622	2.86027	5.63819	0.658618
AAEL012786	220		Peptidase_M1	IPR001930	GO:0008270;GO:0006508;GO:0008237	4.89	24873	4538.04	AAEL012786-PA	9	4.09091	10	4.54545	46.36	0	SignalP-noTM	TMhelix	26295.2	26075.2	15216.7	67587.1	14	401	663	21.1161	604.827	-4.8401	1.14613	2.78163	4.10625	0.657577
AAEL011641	775	transferrin	Transferrin-like_dom;Transferrin	IPR001156;IPR016357	GO:0016021;GO:0005615	4.8	87251	9625.26	AAEL011641-PA	28	3.6129	35	4.51613	50.32	0	SignalP-noTM	TMhelix	27127.5	128835	49438.3	205400	389	811	2453	158.581	330.616	-1.05993	2.58995	2.51932	4.71958	0.654766
AAEL012736	158	60S ribosomal protein L15	Ribosomal_L15e;Ribosomal_L23/L15e_core_dom;Ribosomal_L15e_CS;Rbsml_L15e_core_dom	IPR000439;IPR012678;IPR020925;IPR024794	GO:0003735;GO:0006412;GO:0005622;GO:0005840	11.25	18662.6	1356.32	AAEL012736-PA	5	3.16456	7	4.43038	29.11	0			10050.8	8537.92	14529.6	33118.4	7429	12957	778	9548.84	16654.2	-0.802492	3.87093	4.22152	8.20148	0.646441
AAEL004988	415	Phosphoglycerate kinase [Source:UniProtKB/TrEMBL;Acc:Q8WQL0]	Phosphoglycerate_kinase;Phosphoglycerate_kinase_N;Phosphoglycerate_kinase_CS	IPR001576;IPR015824;IPR015911	GO:0006096;GO:0005524;GO:0004618	6.71	44084.6	1276.46	AAEL004988-PA	14	3.37349	18	4.33735	42.41	0			32843.2	23811.8	13032	69687	1370	3414	1575	869.841	2167.62	-1.31729	3.13672	3.33598	6.27542	0.637224
AAEL005269	441	ubiquinol-cytochrome c reductase complex core protein	Peptidase_M16_C;Metalloenz_LuxS/M16;Pept_M16_N	IPR007863;IPR011249;IPR011765	GO:0003824;GO:0046872	7.69	45912.2	3397.83	AAEL005269-PC	12	2.72109	19	4.30839	51.25	0			3752.67	13658.8	31562.7	48974.1	3738	10081	1511	2473.86	6671.74	-1.4313	3.57264	3.82424	7.21761	0.634315
AAEL005798	496	ATP synthase subunit beta vacuolar	ATPase_F1/V1/A1_a/bsu_nucl-bd;ATPase_F1/V1/A1_a/bsu_N;ATPase_V1-cplx_bsu;ATPase_a/bsu_AS;V-ATPase_su_B/beta;ATPase_F1/V1_b/a_C;P-loop_NTPase	IPR000194;IPR004100;IPR005723;IPR020003;IPR022879;IPR024034;IPR027417	GO:0005524;GO:0015991;GO:0015992;GO:0046034;GO:0033180;GO:0016820	5.24	55501.4	3124.04	AAEL005798-PA	17	3.42742	21	4.23387	48.19	0			10026.2	21622.3	30357.3	62005.8	2000	2292	4096	488.281	559.57	-0.196607	3.30103	2.74785	5.43652	0.626738
AAEL000294	402				GO:0016021	6.88	45150.1	12180.1	AAEL000294-PA	13	3.23383	17	4.22886	32.34	0	SignalP-noTM	TMhelix	88748.7	127845	80887.4	297481	118	2834	1438	82.0584	1970.79	-4.58598	2.07188	3.29464	5.20876	0.626223
AAEL009389	333	Transaldolase [Source:UniProtKB/TrEMBL;Acc:Q16VW8]	TAL/FSA;Transaldolase_1;Aldolase_TIM;Transaldolase_AS	IPR001585;IPR004730;IPR013785;IPR018225	GO:0005975;GO:0003824;GO:0005737;GO:0004801;GO:0006098	6.16	37276.9	512.408	AAEL009389-PA	10	3.003	14	4.2042	28.53	0.0074			7767.5	6138.67	13582.5	27488.7	811	896	1325	612.075	676.226	-0.143797	2.90902	2.83009	5.6169	0.623684
AAEL000068	119	40S ribosomal protein S25 [Source:UniProtKB/TrEMBL;Acc:Q1HRL9]	Ribosomal_S25;WHTH_DNA-bd_dom	IPR004977;IPR011991	GO:0005840	10.76	13453.8	724.229	AAEL000068-PB	3	2.52101	5	4.20168	16.81	0.0029			9254.5	3394	10342.6	22991.1	3411	3813	600	5685	6355	-0.160732	3.53288	3.80312	7.55785	0.623423
AAEL005293	143	Galectin [Source:UniProtKB/TrEMBL;Acc:Q16ND5]	Galectin_CRD;ConA-like_dom	IPR001079;IPR013320	GO:0030246	9.19	16337.6	4342.88	AAEL005293-PA	5	3.4965	6	4.1958	37.76	0			15759.8	23435.5	17097.4	56292.8	45	56	432	104.167	129.63	-0.315502	1.65321	2.1127	4.13043	0.622815
AAEL009670	144	C-Type Lysozyme (Lys-D).	Glyco_hydro_22_lys;Glyco_hydro_22;Glyco_hydro_22_CS;Lysozyme-like_dom	IPR000974;IPR001916;IPR019799;IPR023346	GO:0008152;GO:0003796;GO:0019835;GO:0042742	8.71	16475.5	988.278	AAEL009670-PA	6	4.16667	6	4.16667	31.94	0	SignalP-noTM		12990	3912	8994.11	25896.1	314	446	435	721.839	1025.29	-0.506279	2.49693	3.01085	5.86929	0.619789
AAEL007135	193	peroxiredoxin 5, prdx5	Thioredoxin-like_fold;Redoxin;Thioredoxin_domain	IPR012336;IPR013740;IPR013766	GO:0016491;GO:0045454;GO:0005623	9.24	20931.2	1607.53	AAEL007135-PA	6	3.10881	8	4.14508	41.45	0			8765.25	11508.5	13687.7	33961.4	957	1872	1219	785.07	1535.68	-0.96799	2.98091	3.1863	6.08121	0.617533
AAEL013320	171	translocon-associated protein, delta subunit	TRAP-delta	IPR008855	GO:0016021;GO:0005783	9.43	18385.1	1671.34	AAEL013320-PA	6	3.50877	7	4.09357	25.73	0	SignalP-noTM		18813.5	20577	16597.5	55988	3123	483	897	3481.61	538.462	2.69284	3.49457	2.73115	6.27293	0.612102
AAEL008789	196	apolipophorin-III, putative	ApoLp-III	IPR010009	GO:0008289;GO:0005576;GO:0006869	5.45	22183.2	2095.65	AAEL008789-PA	6	3.06122	8	4.08163	37.24	0	SignalP-noTM		10103.7	2864.42	2825	15793.1	327	555	1085	301.382	511.521	-0.763197	2.51455	2.70886	5.18798	0.610834
AAEL009844	173				GO:0016021	4.41	19915.2	6241.4	AAEL009844-PA	6	3.46821	7	4.04624	33.53	0	SignalP-noTM	TMhelix	24914.5	52873.7	34881.6	112670	269	989	1009	266.601	980.178	-1.87836	2.42975	2.99131	5.41717	0.607052
AAEL007771	150	60S ribosomal protein L22 [Source:UniProtKB/TrEMBL;Acc:Q1HRP2]	Ribosomal_L22e	IPR002671	GO:0003735;GO:0006412;GO:0005622;GO:0005840	10.06	17567.1	3430.65	AAEL007771-PA	4	2.66667	6	4	43.33	0			8487.33	8909	12491.8	29888.1	9007	11658	555	16228.8	21005.4	-0.372202	3.95458	4.32233	8.53262	0.60206
AAEL009524	579	alpha-amylase	Glyco_hydro_13_cat_dom;Glycoside_hydrolase_SF	IPR006047;IPR017853	GO:0005975;GO:0003824	5.21	66752	8309.06	AAEL009524-PA	15	2.59067	23	3.97237	28.15	0	SignalP-noTM		28288.8	9109.08	19151.8	56549.7	709	334	1877	377.73	177.944	1.08594	2.85065	2.25028	4.82746	0.599049
AAEL006090	732	Gelsolin precursor	Villin/Gelsolin;Gelsolin-like_dom;ADF-H/Gelsolin-like_dom;Gelsolin	IPR007122;IPR007123;IPR029006;IPR030004	GO:0005509;GO:0051015;GO:0045010;GO:0051016;GO:0003779;GO:0051014	4.72	81911.9	1460.51	AAEL006090-PA	24	3.27869	29	3.96175	40.71	0			30570.2	24927	10661.2	66158.3	42	220	2934	14.3149	74.983	-2.38904	1.62325	1.87496	3.03076	0.597887
AAEL000793	255	venom allergen	Allrgn_V5/Tpx1;V5_allergen;CAP_domain;P14a_insect	IPR001283;IPR002413;IPR014044;IPR034763		8.94	29638.5	5273.4	AAEL000793-PA	9	3.52941	10	3.92157	40	0	SignalP-noTM		22177.8	24099	30723.7	77000.5	2734	3525	951	2874.87	3706.62	-0.36661	3.4368	3.56898	7.0276	0.59346
AAEL007439	153	myosin light chain 1,	EF_hand_dom;EF-hand-dom_pair;EF_Hand_1_Ca_BS	IPR002048;IPR011992;IPR018247	GO:0005509	4.2	16845.6	621.499	AAEL007439-PB	4	2.61438	6	3.92157	30.61	0.0053			3307.5	4321.5	5952.19	13581.2	196	260	1464	133.88	177.596	-0.407658	2.29226	2.24943	4.37615	0.59346
AAEL011871	306	cytochrome C1	Cyt_c1;Cyt_c-like_dom;Cyt_c1_TM_anchor_C	IPR002326;IPR009056;IPR021157	GO:0009055;GO:0016021;GO:0046872;GO:0020037	8.55	33475.9	2280.03	AAEL011871-PA	7	2.28758	12	3.92157	34.64	0		TMhelix	0	1596	10123.1	11719.1	5147	11278	1356	3795.72	8317.11	-1.13171	3.71155	3.91997	7.49927	0.59346
AAEL005336	332	d-3-phosphoglycerate dehydrogenase	D-isomer_2_OHA_DH_cat_dom;D-isomer_DH_NAD-bd;NAD(P)-bd_dom;D-isomer_DH_CS1;D-isomer_DH_CS	IPR006139;IPR006140;IPR016040;IPR029752;IPR029753	GO:0055114;GO:0008152;GO:0051287;GO:0016616	7.91	35744.2	654.045	AAEL005336-PA	11	3.31325	13	3.91566	39.76	0.0029			8922.5	4911.67	10408.3	24242.4	4039	418	2141	1886.5	195.236	3.27242	3.60627	2.29056	5.56622	0.592805
AAEL003318	716	oligopeptide transporter	POT_fam;PTR2_symporter_CS;MFS_dom	IPR000109;IPR018456;IPR020846	GO:0016020;GO:0016021;GO:0005215;GO:0006810;GO:0006857	4.89	81916.6	2120.27	AAEL003318-PA	22	3.07263	28	3.91061	28.49	0		TMhelix	40084.8	44751.8	17569.4	102406	5604	303	3283	1706.98	92.2936	4.20907	3.7485	1.96517	5.1974	0.592245
AAEL009680	206	chymotrypsin, putative	Trypsin_dom;Peptidase_S1A;Peptidase_S1_PA	IPR001254;IPR001314;IPR009003	GO:0006508;GO:0004252	9.34	22731.9	2013.02	AAEL009680-PA	6	2.91262	8	3.8835	60.68	0	SignalP-noTM	TMhelix	24616.8	23300.2	27871.5	75788.4	1117	1907	1155	967.1	1651.08	-0.771676	3.04805	3.21777	6.20324	0.589223
AAEL007707	338	Malate dehydrogenase [Source:UniProtKB/TrEMBL;Acc:Q171B2]	Lactate/malate_DH_N;Malate_DH_AS;L-lactate/malate_DH;Malate_DH_type2;Malate_DH_NAD-dep_euk;Lactate_DH/Glyco_Ohase_4_C;NAD(P)-bd_dom;Lactate/malate_DH_C	IPR001236;IPR001252;IPR001557;IPR010945;IPR011274;IPR015955;IPR016040;IPR022383	GO:0005975;GO:0016491;GO:0055114;GO:0003824;GO:0006108;GO:0016616;GO:0019752;GO:0006099;GO:0030060;GO:0016615	5.97	36491.9	1836.95	AAEL007707-PA	11	3.25444	13	3.84615	45.56	0			25858.7	22845.4	20041.6	68745.7	2505	2747	1494	1676.71	1838.69	-0.133046	3.39881	3.26451	6.48897	0.585027
AAEL011551	884		PGRP	IPR015510	GO:0016021	5.42	99967.1	3768.01	AAEL011551-PA	26	2.94118	34	3.84615	34.28	0	SignalP-noTM	TMhelix	16653.8	58954.5	36002.8	111611	981	2182	3136	312.819	695.791	-1.15333	2.99167	2.84248	5.33777	0.585027
AAEL000500	261		Haemolymph_juvenile_hormone-bd	IPR010562		4.49	29134.6	2679.01	AAEL000500-PA	9	3.44828	10	3.83142	34.87	0	SignalP-noTM		17107.5	14547.8	6381.83	38037.1	4262	147	1428	2984.59	102.941	4.85764	3.62961	2.01259	5.48747	0.583359
AAEL003053	183	allergen, putative	Allrgn_V5/Tpx1;CAP_domain;V5_allergen;P14a_insect	IPR001283;IPR014044;IPR002413;IPR034763		8.75	30233	1399.54	AAEL003053-PC	5	2.73224	7	3.82514	34.9	0	SignalP-noTM		1181.83	0	8740.44	9922.28	694	601	923	751.896	651.138	0.207571	2.84136	2.81367	5.68983	0.582647
AAEL001577	863		DUF753	IPR008472	GO:0016021	4.65	98149	2623.59	AAEL001577-PA	27	3.12862	33	3.82387	45.31	0	SignalP-noTM	TMhelix	46230.3	63815.7	21392.5	131439	1169	2971	3023	386.702	982.799	-1.34567	3.06781	2.99246	5.57984	0.582503
AAEL008166	419	malate dehydrogenase	Lactate/malate_DH_N;Malate_DH_type1;Lactate_DH/Glyco_Ohase_4_C;NAD(P)-bd_dom;Lactate/malate_DH_C	IPR001236;IPR010097;IPR015955;IPR016040;IPR022383	GO:0005975;GO:0016491;GO:0055114;GO:0003824;GO:0006108;GO:0016616;GO:0006099;GO:0030060	9.2	45072.8	1451.82	AAEL008166-PA	13	3.10263	16	3.81862	36.75	0			36646	23171.3	16275.8	76093.2	4073	6469	2005	2031.42	3226.43	-0.667451	3.60991	3.50872	6.81652	0.581906
AAEL017349	655		Hsp_70_fam;Heat_shock_70_CS;HSP70_peptide-bd;HSP70_C	IPR013126;IPR018181;IPR029047;IPR029048	GO:0005524	4.87	72401	2772.15	AAEL017349-PA	17	2.59542	25	3.81679	30.08	0	SignalP-noTM		30187.7	19106.8	14037.8	63332.3	12220	4120	1968	6209.35	2093.5	1.56853	4.08707	3.32087	7.11392	0.581699
AAEL010823	210	ATP synthase delta chain	ATPase_OSCP/dsu;ATP_synth_OSCP/delta_N	IPR000711;IPR026015	GO:0046933;GO:0015986	10.1	22717.5	1618.26	AAEL010823-PA	6	2.85714	8	3.80952	38.57	0			1128.75	0	12133.1	13261.9	4027	7648	902	4464.52	8478.94	-0.925377	3.60498	3.92834	7.57812	0.580871
AAEL010789	185		EF_hand_dom;EF-hand-dom_pair;EF_Hand_1_Ca_BS	IPR002048;IPR011992;IPR018247	GO:0005509	4.67	21531	1472.68	AAEL010789-PA	5	2.7027	7	3.78378	30.27	0			8666.83	4653.83	0	13320.7	51	111	606	84.1584	183.168	-1.12199	1.70757	2.26285	4.18795	0.577926
AAEL002501	397	protein disulfide isomerase	Thioredoxin-like_fold;Thioredoxin_domain;Thioredoxin_CS	IPR012336;IPR013766;IPR017937	GO:0016853;GO:0045454;GO:0005623	4.89	45064.5	774.576	AAEL002501-PA	10	2.51889	15	3.77834	37.53	0	SignalP-noTM		22101.5	17592.8	10751.4	50445.7	1667	1212	1906	874.607	635.887	0.459864	3.22194	2.80338	5.74519	0.577301
AAEL004699	1006		RRM_dom	IPR000504	GO:0003676	9.9	112379	2292.58	AAEL004699-PA	29	2.8827	38	3.77734	34.89	0			31106.8	17210.8	15288.9	63606.6	18329	15917	4104	4466.13	3878.41	0.20356	4.26314	3.58865	7.23859	0.577186
AAEL012783	955	protease m1 zinc metalloprotease	Peptidase_M1;Peptidase_M1_N;ERAP1-like_C_dom;M1_APN-typ	IPR001930;IPR014782;IPR024571;IPR034016	GO:0008270;GO:0006508;GO:0004177;GO:0008237	5.44	107860	1611.48	AAEL012783-PA	28	2.93194	36	3.76963	36.44	0	SignalP-noTM		32346.2	47271	17756.4	97373.6	9248	2644	3044	3038.11	868.594	1.80642	3.96605	2.93882	6.42142	0.576299
AAEL014734	930		Sacchrp_dh_NADP;AlaDH/PNT_NAD(H)-bd;AlaDH/PNT_N;NAD(P)-bd_dom;Sacchrp_dh_C	IPR005097;IPR007698;IPR007886;IPR016040;IPR032095	GO:0016491;GO:0055114	6.38	103568	4956.01	AAEL014734-PA	26	2.7957	35	3.76344	36.77	0			10193.7	7393.5	41240.4	58827.6	3405	783	2979	1143	262.84	2.12057	3.53212	2.41969	5.47774	0.575585
AAEL006922	188	calponin/transgelin	Calponin_repeat;CH-domain;SM22_calponin	IPR000557;IPR001715;IPR003096	GO:0005515	8.25	20949.7	905.531	AAEL006922-PA	4	2.12766	7	3.7234	23.94	0			11351.8	4689	6190.42	22231.2	1450	1075	1726	840.093	622.827	0.431716	3.16137	2.79437	5.7187	0.57094
AAEL011756	539	aldehyde dehydrogenase	Aldehyde_DH_dom;Ald_DH/histidinol_DH;Ald_DH_N;Ald_DH_CS_GLU	IPR015590;IPR016161;IPR016162;IPR029510	GO:0016491;GO:0055114;GO:0008152	6.87	58750	811.912	AAEL011756-PA	15	2.78293	20	3.71058	31.35	0			20940.3	9303.92	17091.3	47335.5	5458	565	1751	3117.08	322.673	3.27205	3.73703	2.50876	6.00251	0.569441
AAEL007494	189	calcineurin b subunit	EF_hand_dom;EF-hand-dom_pair;EF_Hand_1_Ca_BS	IPR002048;IPR011992;IPR018247	GO:0005509	4.75	22204	2694.47	AAEL007494-PA	7	3.7037	7	3.7037	42.33	0			2602.5	12122.8	14060.4	28785.8	245	382	992	246.976	385.081	-0.640791	2.38917	2.58555	4.97821	0.568636
AAEL000766	54	ubiquinol cytochrome C oxidoreductase-subunit 6.4kD-subunit, putative	UQCR	IPR015089	GO:0009055;GO:0008121	9.33	6046.02	2978.79	AAEL000766-PA	2	3.7037	2	3.7037	29.63	0		TMhelix	0	9583.25	26920.5	36503.8	931	1525	165	5642.42	9242.42	-0.711956	2.96895	3.96579	7.71725	0.568636
AAEL009345	272	prohibitin	Prohibitin;Band_7	IPR000163;IPR001107	GO:0016020	5.2	29903.3	3729.49	AAEL009345-PA	9	3.30882	10	3.67647	46.32	0			0	0	16155.3	16155.3	2135	878	1859	1148.47	472.297	1.28194	3.3294	2.67422	5.73433	0.565431
AAEL006568	300	serine protease	Trypsin_dom;Peptidase_S1A;Peptidase_S1_PA;TRYPSIN_HIS	IPR001254;IPR001314;IPR009003;IPR018114	GO:0006508;GO:0004252	4.43	32477.9	2265.03	AAEL006568-PB	8	2.66667	11	3.66667	37.11	0	SignalP-noTM		17704.3	13281.4	6948.5	37934.2	12	177	1073	11.1836	164.958	-3.88264	1.07918	2.21737	3.26596	0.564271
AAEL017022	355				GO:0016021	5.24	36897	3057.59	AAEL017022-PA	8	2.25352	13	3.66197	22.54	0	SignalP-noTM	TMhelix	39814.7	63765.2	36983.5	140563	1374	14446	1184	1160.47	12201	-3.39422	3.13799	4.0864	7.15103	0.563715
AAEL005672	524	adenosine deaminase	A/AMP_deaminase_dom;ADGF;A_deaminase_N;Metal_Hydrolase	IPR001365;IPR006331;IPR013659;IPR032466	GO:0005615;GO:0019239	6.38	59985.4	1977.48	AAEL005672-PA	15	2.8626	19	3.62595	36.83	0	SignalP-noTM		39725	18538.7	20309	78572.7	525	586	2692	195.022	217.682	-0.158583	2.72016	2.33782	4.62791	0.559422
AAEL007383	221	secreted ferritin G subunit precursor, putative	Ferritin;Ferritin-like_diiron;Ferritin-like_SF;Ferritin-rel	IPR001519;IPR009040;IPR009078;IPR012347	GO:0008199;GO:0006826;GO:0006879;GO:0004322;GO:0005623	5.39	17695.1	12004.5	AAEL007383-PC	7	3.16742	8	3.61991	53.55	0	SignalP-noTM		63438.3	29595.4	8742.83	101777	6221	4845	1085	5733.64	4465.44	0.36065	3.79386	3.64986	7.40829	0.558698
AAEL001703	252	juvenile hormone-regulated chymotrypsin-like serine protease	Trypsin_dom;Peptidase_S1A;Peptidase_S1_PA;TRYPSIN_HIS	IPR001254;IPR001314;IPR009003;IPR018114	GO:0006508;GO:0004252	8	27971.2	3966.23	AAEL001703-PA	9	3.57143	9	3.57143	40.48	0	SignalP-noTM		17623	11743.2	5501.03	34867.2	1240	16777	957	1295.72	17530.8	-3.75807	3.09342	4.2438	7.35631	0.552842
AAEL010382	1268	aldehyde oxidase	Ald_Oxase/Xan_DH_a/b;2Fe-2S_ferredoxin-type;Mopterin_DH_FAD-bd;2Fe-2S-bd;CO_DH_flav_C;2Fe2S_fd_BS;AldOxase/xan_DH_Mopterin-bd;Beta-grasp_dom;FAD-bd_2;FAD-bd_2_sub1;CO_DH_flavot_FAD-bd_sub2;Ald_Oxase/xanthine_DH	IPR000674;IPR001041;IPR002346;IPR002888;IPR005107;IPR006058;IPR008274;IPR012675;IPR016166;IPR016167;IPR016169;IPR016208	GO:0009055;GO:0016491;GO:0055114;GO:0016614;GO:0050660;GO:0003824;GO:0046872;GO:0005506;GO:0051536;GO:0051537	6.26	141131	1248.74	AAEL010382-PA	28	2.2082	45	3.5489	27.05	0			33727.8	19981.3	24546.8	78255.9	556	1486	4164	133.525	356.868	-1.41828	2.74507	2.55251	4.67807	0.550093
AAEL000905	595	Carboxylic ester hydrolase (Fragment) [Source:UniProtKB/TrEMBL;Acc:Q17MV5]	CarbesteraseB;Carboxylesterase_B_AS;AB_hydrolase	IPR002018;IPR019826;IPR029058	GO:0016787	6.09	66240.6	2791.94	AAEL000905-PA	15	2.52101	21	3.52941	28.74	0	SignalP-noTM		20709.7	33132.2	10917.7	64759.5	81	146	1788	45.302	81.6555	-0.849975	1.90849	1.91199	3.5681	0.547702
AAEL005946	114	NADH-ubiquinone oxidoreductase subunit B14.5b	NADH-UbQ_OxRdtase_b14.5b_su	IPR009423	GO:0006120;GO:0008137;GO:0005743;GO:0070469	9.18	12741.6	1807.53	AAEL005946-PA	4	3.50877	4	3.50877	43.86	0			0	0	16184.8	16184.8	580	1273	594	976.431	2143.1	-1.13411	2.76343	3.33104	6.32068	0.545155
AAEL013284	257	late trypsin 1, serine-type enodpeptidase	Trypsin_dom;Peptidase_S1A;Peptidase_S1_PA;TRYPSIN_HIS;TRYPSIN_SER	IPR001254;IPR001314;IPR009003;IPR018114;IPR033116	GO:0006508;GO:0004252	5.45	27815.3	965.372	AAEL013284-PA	8	3.11284	9	3.50195	49.81	0	SignalP-noTM		19633	15624.5	15982.7	51240.2	9955	25	1694	5876.62	14.758	8.63735	3.99804	1.16903	4.93816	0.544309
AAEL000651	601	alpha-amylase	Glyco_hydro_13_cat_dom;Glycoside_hydrolase_SF	IPR006047;IPR017853	GO:0005975;GO:0003824	4.71	69595.2	2176.26	AAEL000651-PA	18	2.99501	21	3.49418	38.27	0	SignalP-noTM		21411.8	18571.8	6863.89	46847.6	407	608	2030	200.493	299.507	-0.579043	2.60959	2.47641	4.77851	0.543345
AAEL008103	173	40S ribosomal protein S8 [Source:UniProtKB/TrEMBL;Acc:Q1HRQ9]	Ribosomal_S8e;Ribosomal_S8e_CS;Ribosomal_S8e/biogenesis_NSA2	IPR001047;IPR018283;IPR022309	GO:0003735;GO:0006412;GO:0005622;GO:0005840	11.28	19756	1430.02	AAEL008103-PA	4	2.31214	6	3.46821	31.79	0			4428.25	5677	7753.31	17858.6	17619	21069	863	20416	24413.7	-0.25799	4.24598	4.38763	8.6976	0.540105
AAEL011197	376	actin	Actin;Actin_CS;Actin/actin-like_CS	IPR004000;IPR004001;IPR020902	GO:0005524	5.15	42221.1	16159.5	AAEL011197-PA	8	2.12766	13	3.45745	20.21	0			27915.7	24966	30313.6	83195.3	14514	17981	1559	9309.81	11533.7	-0.309028	4.16179	4.06197	8.03091	0.538756
AAEL005199	145		CarbesteraseB;AB_hydrolase	IPR002018;IPR029058		4.49	16871.6	1345.12	AAEL005199-PA	5	3.44828	5	3.44828	52.41	0			11491.5	6234.5	3430.5	21156.5	20	39	438	45.6621	89.0411	-0.963474	1.30103	1.94959	3.60915	0.537602
AAEL012579	408	Aspartate aminotransferase [Source:UniProtKB/TrEMBL;Acc:Q16LN3]	Asp_trans;NHTrfase_class1_PyrdxlP-BS;Aminotransferase_I/II;PyrdxlP-dep_Trfase_sub2;PyrdxlP-dep_Trfase	IPR000796;IPR004838;IPR004839;IPR015422;IPR015424	GO:0003824;GO:0030170;GO:0008483;GO:0006520;GO:0009058;GO:0004069;GO:0080130	7.17	45819.3	1323.28	AAEL012579-PA	10	2.45098	14	3.43137	32.11	0			5834.5	8809.92	15008.4	29652.9	2013	1119	2317	868.796	482.952	0.847137	3.30384	2.6839	5.62282	0.535468
AAEL012552	730	NADH-ubiquinone oxidoreductase	NADH_UbQ_OxRdtase_75kDa_su_CS;2Fe-2S_ferredoxin-type;Mopterin_OxRdtase;Mopterin_OxRdtase_4Fe-4S_dom;NADH_UbQ_OxRdtase_Gsu;Beta-grasp_dom;NuoG_C;NADH_UbQ_OxRdtase_Gsu_4Fe4S-bd	IPR000283;IPR001041;IPR006656;IPR006963;IPR010228;IPR012675;IPR015405;IPR019574	GO:0009055;GO:0016020;GO:0016491;GO:0055114;GO:0008137;GO:0042773;GO:0051536;GO:0016651	6.53	80169.6	2047.23	AAEL012552-PA	17	2.32877	25	3.42466	36.85	0			55110	15287.2	20790.1	91187.3	2303	4022	2530	910.277	1589.72	-0.804399	3.36229	3.20132	6.1605	0.534617
AAEL012631	1002	myosin i	IQ_motif_EF-hand-BS;Myosin_head_motor_dom;Myosin_TH1;P-loop_NTPase	IPR000048;IPR001609;IPR010926;IPR027417	GO:0005524;GO:0003774;GO:0016459;GO:0005515	9.76	117003	1453.91	AAEL012631-PA	26	2.59481	34	3.39321	32.63	0		TMhelix	11243.3	24238.7	23348.2	58830.2	957	1194	3789	252.573	315.123	-0.319212	2.98091	2.49848	4.90087	0.530611
AAEL012825	590	bifunctional purine biosynthesis protein	AICARFT_IMPCHas;MGS-like_dom;Cytidine_deaminase-like;AICAR_Tfase_dom	IPR002695;IPR011607;IPR016193;IPR024051	GO:0003824;GO:0006164;GO:0003937;GO:0004643	8	64680.7	996.346	AAEL012825-PA	13	2.20339	20	3.38983	22.03	0			18662.3	8152.58	7862.44	34677.4	4791	860	2059	2326.86	417.678	2.47792	3.68043	2.62084	5.98761	0.530178
AAEL012904	443	rab gdp-dissociation inhibitor	RabGDI;GDP_dissociation_inhibitor;FAD/NAD-binding_dom	IPR000806;IPR018203;IPR023753	GO:0016491;GO:0055114;GO:0005096;GO:0005737;GO:0007264;GO:0005093;GO:0015031;GO:0005092	5.23	50227.2	665.443	AAEL012904-PA	9	2.0316	15	3.386	26.86	0.0029			27258.7	44898	20993.3	93149.9	2484	1846	3222	770.95	572.936	0.428263	3.39515	2.75811	5.64513	0.529688
AAEL007385	208	Ferritin subunit Precursor (EC 1.16.3.1)(Ferritin heavy chain-like protein)(AeFer(H))	Ferritin;Ferritin_DPS_dom;Ferritin-like_diiron;Ferritin-like_SF;Ferritin-rel	IPR001519;IPR008331;IPR009040;IPR009078;IPR012347	GO:0005576;GO:0008199;GO:0006826;GO:0006879;GO:0004322;GO:0005623	5.57	23762	1874.72	AAEL007385-PA	5	2.40385	7	3.36538	36.06	0	SignalP-noTM		25683.3	8296	3159.5	37138.8	6239	4578	1124	5550.71	4072.95	0.446597	3.79511	3.60991	7.35426	0.527035
AAEL008697	119	cytochrome c oxidase, subunit VB, putative	Cyt_c_oxidase_su5b	IPR002124	GO:0004129;GO:0005740	8.3	14022.1	1115.16	AAEL008697-PA	3	2.52101	4	3.36134	40.34	0			0	0	10666.4	10666.4	4	20	633	6.31912	31.5956	-2.32193	0.60206	1.49963	2.30029	0.526513
AAEL012282	298	prohibitin	Prohibitin;Band_7	IPR000163;IPR001107	GO:0016020	10	33047.1	4957.21	AAEL012282-PA	9	3.02013	10	3.3557	35.57	0			3854	3061	24706.3	31621.3	448	201	1817	246.56	110.622	1.1563	2.65128	2.04384	4.43576	0.525784
AAEL003182	418	Serine Protease Inhibitor (serpin) homologue - unlikely to be inhibitory.	Serpin_fam;Serpin_dom	IPR000215;IPR023796	GO:0005615	5.25	47267.3	485.298	AAEL003182-PA	11	2.63158	14	3.34928	28.71	0.0074	SignalP-noTM		8409.17	7114.5	14992.8	30516.4	774	852	1257	615.752	677.804	-0.13852	2.88874	2.8311	5.62051	0.524952
AAEL013739	329	electron transport oxidoreductase	ETF_a/FixB;Rossmann-like_a/b/a_fold;ETF_a/b_N;ETF_asu_C;ETF_asu_C_CS;DHS-like_NAD/FAD-binding_dom;ETF_alpha_N	IPR001308;IPR014729;IPR014730;IPR014731;IPR018206;IPR029035;IPR033947	GO:0009055;GO:0050660	8.88	34461.5	743.666	AAEL013739-PA	9	2.73556	11	3.34347	27.96	0.0029			11446.3	7264.58	6128.17	24839.1	1592	2367	1301	1223.67	1819.37	-0.572219	3.20194	3.25992	6.34759	0.524197
AAEL001588	483	glutamate carboxypeptidase	ArgE/DapE_CS;Peptidase_M20;Peptidase_M20_dimer;CNDP/DUG1	IPR001261;IPR002933;IPR011650;IPR017153	GO:0016787;GO:0016805;GO:0006508;GO:0008152;GO:0008237	5.2	53723.2	633.933	AAEL001588-PA	12	2.48447	16	3.31263	31.88	0.0053			11369	10717.5	8906.78	30993.3	2753	903	1634	1684.82	552.632	1.60821	3.43981	2.74244	5.96899	0.520173
AAEL009029	516	aldehyde dehydrogenase	Aldehyde_DH_dom;Ald_DH_CS_CYS;Ald_DH/histidinol_DH;Ald_DH_N;Ald_DH_CS_GLU	IPR015590;IPR016160;IPR016161;IPR016162;IPR029510	GO:0016491;GO:0055114;GO:0008152	8.15	56846	969.593	AAEL009029-PA	12	2.32558	17	3.29457	33.14	0			4117.17	1523.5	11858.5	17499.2	1093	788	2275	480.44	346.374	0.472026	3.03862	2.53954	5.22118	0.517799
AAEL000445	152		SVWC_dom	IPR029277		4.52	17124.3	1092.73	AAEL000445-PA	4	2.63158	5	3.28947	19.08	0	SignalP-noTM		12575.3	8295.17	13767.7	34638.2	393	1328	1624	241.995	817.734	-1.75665	2.59439	2.91261	5.29642	0.517126
AAEL000454	396	Isocitrate dehydrogenase [NAD] subunit, mitochondrial [Source:UniProtKB/TrEMBL;Acc:Q17P79]	Isocitrate_DH_NAD;IsoCit/isopropylmalate_DH_CS;IsoPropMal-DH-like_dom	IPR004434;IPR019818;IPR024084	GO:0055114;GO:0005739;GO:0000287;GO:0051287;GO:0016616;GO:0004449;GO:0006099	8.58	44068.7	1366.5	AAEL000454-PA	11	2.77778	13	3.28283	36.36	0			5119.5	3029	16003.7	24152.2	1683	3514	1732	971.709	2028.87	-1.06208	3.22608	3.30725	6.29479	0.516248
AAEL005432	1405		Sushi_SCR_CCP_dom;VWF_type-D;NIDO_dom;AMOP_dom;Ig-like_fold;Ig_E-set	IPR000436;IPR001846;IPR003886;IPR005533;IPR013783;IPR014756	GO:0016021;GO:0007160	5.24	162199	2199.54	AAEL005432-PA	38	2.70463	46	3.27402	29.4	0	SignalP-noTM	TMhelix	10548.3	30672.2	44673.5	85894	1429	3283	4491	318.192	731.018	-1.20001	3.15503	2.86393	5.36662	0.515082
AAEL000274	153	Copper-Zinc(Cu-Zn) superoxide dismutase.	SOD_Cu_Zn_dom;SOD_Cu/Zn_BS	IPR001424;IPR018152	GO:0055114;GO:0046872;GO:0004784;GO:0006801	5.76	15625.2	6019.33	AAEL000274-PA	5	3.26797	5	3.26797	52.94	0			25666.7	11135	3535	40336.7	72	147	462	155.844	318.182	-1.02975	1.85733	2.50268	4.69537	0.514279
AAEL003066	469	brain chitinase and chia	Glyco_hydro18_cat;Glyco_hydro_18_chit_AS;Chitin-bd_dom;Chitinase_II;Glycoside_hydrolase_SF;Chitinase_insertion	IPR001223;IPR001579;IPR002557;IPR011583;IPR017853;IPR029070	GO:0005975;GO:0004553;GO:0005576;GO:0008061;GO:0006030	4.77	53115.7	2533.51	AAEL003066-PA	12	2.55864	15	3.19829	31.98	0	SignalP-noTM		29469.3	22322.2	11327.9	63119.4	2104	1533	1668	1261.39	919.065	0.456777	3.32305	2.96335	6.0642	0.504918
AAEL000746	409	NADP-specific isocitrate dehydrogenase	Isocitrate_DH_NADP;IsoCit/isopropylmalate_DH_CS;IsoPropMal-DH-like_dom	IPR004790;IPR019818;IPR024084	GO:0055114;GO:0000287;GO:0051287;GO:0016616;GO:0006099;GO:0004450;GO:0006102	6.4	46294	510.333	AAEL000746-PA	10	2.44499	13	3.17848	24.94	0.0074			7588.33	2930	6730	17248.3	2265	811	1629	1390.42	497.851	1.48174	3.35507	2.6971	5.84025	0.50222
AAEL000732	568					5.95	65206.4	621.49	AAEL000732-PA	14	2.46479	18	3.16901	28.52	0.0053	SignalP-noTM		15272.7	18394.3	15492.2	49159.1	925	752	2205	419.501	341.043	0.298721	2.96614	2.53281	5.15554	0.500924
AAEL003352	127	60S ribosomal protein l7ae	H/ACA_rnp_Nhp2_euk;Ribosomal_L7Ae_CS;Ribosomal_L7Ae/L30e/S12e/Gad45;Ribosomal_L7Ae/L8/Nhp2;L30e-like	IPR002415;IPR004037;IPR004038;IPR018492;IPR029064	GO:0005840;GO:0003723;GO:0042254;GO:0030529;GO:0005730	7.99	14235.5	574.669	AAEL003352-PA	3	2.3622	4	3.14961	28.35	0.0053			1221	0	2206.33	3427.33	2424	1143	686	3533.53	1666.18	1.08456	3.38453	3.22172	6.76993	0.498256
AAEL002107	445	sulfide quinone reductase	FAD/NAD-binding_dom	IPR023753	GO:0016491;GO:0055114	9.25	50026.5	2654.01	AAEL002107-PA	10	2.24719	14	3.14607	35.73	0			3632.83	4690	25123.6	33446.4	649	347	2481	261.588	139.863	0.903283	2.81224	2.1457	4.56332	0.497768
AAEL012207	159	myosin light chain 1,	EF_hand_dom;EF-hand-dom_pair	IPR002048;IPR011992	GO:0005509	4.5	13771.7	1952.26	AAEL012207-PC	3	1.88679	5	3.14465	31.67	0			1067	0	10362.2	11429.2	4844	11108	907	5340.68	12247	-1.19733	3.6852	4.08803	7.81563	0.497573
AAEL002851	447	Tubulin beta chain [Source:UniProtKB/TrEMBL;Acc:Q17GX9]	Tubulin;Beta_tubulin;Tubulin_FtsZ_GTPase;Tub_FtsZ_C;Beta-tubulin_BS;Tubulin_CS;Tubulin/FtsZ_2-layer-sand-dom	IPR000217;IPR002453;IPR003008;IPR008280;IPR013838;IPR017975;IPR018316	GO:0007017;GO:0005874;GO:0003924;GO:0005525;GO:0005737;GO:0005200	4.56	50575.6	11560.4	AAEL002851-PA	12	2.68456	14	3.13199	42.28	0			14940.5	17768.5	50979.7	83688.7	12744	9530	2376	5363.64	4010.94	0.41927	4.10531	3.60325	7.33271	0.495821
AAEL005760	64					10.03	7118.34	2333.49	AAEL005760-PA	2	3.125	2	3.125	34.38	0			0	5783	8587	14370	616	726	771	798.962	941.634	-0.237039	2.78958	2.97388	5.87641	0.49485
AAEL000219	288	lactoylglutathione lyase	Glyas_Bleomycin-R_OHBP_Dase	IPR029068		5.8	32596.9	2533.41	AAEL000219-PA	8	2.77778	9	3.125	32.64	0			22467.7	13032.5	3017.5	38517.7	36	52	2156	16.6976	24.1187	-0.530515	1.5563	1.38235	2.60501	0.49485
AAEL004338	354	pyruvate dehydrogenase	Transketolase-like_Pyr-bd;Transketo_C/PFOR_II;PDHB;THDP-binding;Transketolase_C	IPR005475;IPR009014;IPR027110;IPR029061;IPR033248	GO:0003824;GO:0008152;GO:0004739;GO:0006086	6.4	38850.6	1045.99	AAEL004338-PA	7	1.9774	11	3.10734	26.27	0			16735.8	16859.2	9408.39	43003.4	1377	2760	2270	606.608	1215.86	-1.00314	3.13893	3.08488	5.86779	0.492389
AAEL011116	258	14-3-3 protein sigma, gamma, zeta, beta/alpha	14-3-3;14-3-3_CS;14-3-3_domain	IPR000308;IPR023409;IPR023410	GO:0019904	4.54	29626.3	2613.86	AAEL011116-PA	6	2.32558	8	3.10078	27.91	0			10031.7	7132.08	5808.22	22972	3063	2152	2150	1424.65	1000.93	0.509267	3.48615	3.0004	6.15411	0.49147
AAEL005808	947	alanyl aminopeptidase	Peptidase_M1;Peptidase_M1_N;ERAP1-like_C_dom;M1_APN-typ	IPR001930;IPR014782;IPR024571;IPR034016	GO:0008270;GO:0016021;GO:0006508;GO:0004177;GO:0008237	4.7	108693	929.913	AAEL005808-PA	21	2.21753	29	3.0623	26.29	0	SignalP-noTM	TMhelix	17867.3	41394.7	13050.2	72312.2	88	306	3511	25.0641	87.1547	-1.79796	1.94448	1.94029	3.33934	0.486048
AAEL006509	99		ATP_synth_F0_gsu_mt;ATP_synth_su_G_mt_met	IPR006808;IPR016702	GO:0015986;GO:0015078;GO:0000276	10.03	10931.8	2314.44	AAEL006509-PA	2	2.0202	3	3.0303	30.3	0			972	3935.5	20185.3	25092.8	2006	2937	458	4379.91	6412.66	-0.550022	3.30233	3.80704	7.4485	0.481486
AAEL003655	1629		YD;Rhs_assc_core;Tox-SGS_dom	IPR006530;IPR022385;IPR028901	GO:0016021;GO:0097264	5.82	186327	670.263	AAEL003655-PA	34	2.08717	49	3.00798	28.85	0.0029		TMhelix	24112.2	27691	60972.4	112776	115	242	5177	22.2136	46.7452	-1.07337	2.0607	1.66974	3.01636	0.478275
AAEL007942	268	fibrinogen and fibronectin	Fibrinogen_a/b/g_C_dom;Fibrinogen_a/b/g_C_2;Fibrinogen_a/b/g_C_1	IPR002181;IPR014715;IPR014716		6.79	30597.4	2580.04	AAEL007942-PA	6	2.23881	8	2.98507	29.1	0	SignalP-noTM		15463	15080.8	15214	45757.8	403	524	941	428.268	556.854	-0.378787	2.60531	2.74574	5.37746	0.474955
AAEL003827	134	Histone H3 [Source:UniProtKB/TrEMBL;Acc:Q17EE9]	Histone_H3/CENP-A;Histone_H2A/H2B/H3;Histone-fold	IPR000164;IPR007125;IPR009072	GO:0003677;GO:0005634;GO:0000786;GO:0046982	11.56	15175.7	1115.95	AAEL003827-PA	3	2.23881	4	2.98507	11.19	0			7833.42	0	0	7833.42	0	0	405	0	0					0.474955
AAEL013715	268	trypsin	Trypsin_dom;Peptidase_S1A;Peptidase_S1_PA;TRYPSIN_HIS;TRYPSIN_SER	IPR001254;IPR001314;IPR009003;IPR018114;IPR033116	GO:0006508;GO:0004252	4.65	29131.5	3500.36	AAEL013715-PA	5	1.86567	8	2.98507	31.72	0	SignalP-noTM		19665	11009.3	4884.5	35558.8	4024	28	889	4526.43	31.4961	7.16706	3.60466	1.49826	5.15401	0.474955
AAEL014548	238	thioredoxin peroxidase	AhpC/TSA;Thioredoxin-like_fold;Thioredoxin_domain;Peroxiredoxin_C;Peroxiredoxin_AhpC-typ	IPR000866;IPR012336;IPR013766;IPR019479;IPR024706	GO:0016491;GO:0055114;GO:0045454;GO:0051920;GO:0016209;GO:0005623	6.87	26981.6	371.379	AAEL014548-PA	4	1.68067	7	2.94118	18.07	0.0197			4239.58	8074	6826.78	19140.4	410	367	717	571.827	511.855	0.159844	2.61278	2.70915	5.46641	0.468521
AAEL000044	408	ornithine decarboxylase	Orn/DAP/Arg_de-COase;Orn_de-COase;Ala_racemase/Decarboxylase_C;De-COase2_C;De-COase2_N;PLP-binding_barrel	IPR000183;IPR002433;IPR009006;IPR022643;IPR022644;IPR029066	GO:0003824;GO:0006596	6.63	47263.6	1580.02	AAEL000044-PA	9	2.20588	12	2.94118	25.49	0			35496.5	32400.6	10266.2	78163.3	44	372	1734	25.3749	214.533	-3.07973	1.64345	2.33149	3.7359	0.468521
AAEL010235	273	30 kDa salivary gland allergen Aed a 3 Precursor (Allergen Aed a 3)	Salivary_gland_allergen_Aed3	IPR017262	GO:0005576	3.95	29440.1	2021.2	AAEL010235-PA	6	2.1978	8	2.9304	19.41	0	SignalP-noTM		13188	4641.5	3034	20863.5	2946	2958	947	3110.88	3123.55	-0.00586462	3.46923	3.49465	6.98753	0.466927
AAEL001673	376	actin	Actin;Actin_CS;Actin/actin-like_CS	IPR004000;IPR004001;IPR020902	GO:0005524	5.06	42176.1	14474.9	AAEL001673-PA	7	1.8617	11	2.92553	10.9	0			7590.17	7190.17	10609.3	25389.6	7069	10861	3350	2110.15	3242.09	-0.619579	3.84936	3.51083	6.83514	0.466205
AAEL005069	206	ras-related protein Rab-1A, putative	Small_GTPase;Small_GTP-bd_dom;Sigma_54_int_dom_ATP-bd_1;P-loop_NTPase	IPR001806;IPR005225;IPR025662;IPR027417	GO:0003924;GO:0005525	4.98	23150.1	467.69	AAEL005069-PA	4	1.94175	6	2.91262	14.08	0.0115			20493.2	5992	9337.17	35822.3	685	575	621	1103.06	925.926	0.252542	2.83569	2.96658	6.00918	0.464284
AAEL007776	275					5.11	30924.3	2675.18	AAEL007776-PA	7	2.54545	8	2.90909	26.55	0	SignalP-TM	TMhelix	22735.3	21977.3	25186.4	69899.1	313	444	967	323.681	459.152	-0.504397	2.49554	2.66196	5.17207	0.463757
AAEL002504	173	ATP synthase delta chain, mitochondrial	ATP_synth_F1_dsu/esu;ATP_synth_F1_dsu/esu_N	IPR001469;IPR020546	GO:0046933;GO:0015986;GO:0045261	5.02	17030.2	2557.01	AAEL002504-PB	3	1.7341	5	2.89017	21.74	0			3418.25	6145	6107.17	15670.4	3841	7270	854	4497.66	8512.88	-0.920473	3.58444	3.93008	7.58306	0.460924
AAEL005515	280	heterogeneous nuclear ribonucleoprotein	RRM_dom	IPR000504	GO:0003676	9.28	29903	6249.51	AAEL005515-PA	6	2.14286	8	2.85714	33.21	0			58057.7	32134.3	17046.3	107238	14257	9883	2571	5545.31	3844.03	0.528649	4.15403	3.58479	7.32871	0.455932
AAEL005178	385	Carboxylic ester hydrolase (Fragment) [Source:UniProtKB/TrEMBL;Acc:Q17AV5]	CarbesteraseB;Carboxylesterase_B_CS;Carboxylesterase_B_AS;AB_hydrolase	IPR002018;IPR019819;IPR019826;IPR029058	GO:0016787	4.71	43489.4	1114.21	AAEL005178-PA	8	2.07792	11	2.85714	27.01	0	SignalP-noTM		23639.7	10444.8	3405.75	37490.2	62	105	1158	53.5406	90.6736	-0.760049	1.79239	1.95748	3.68617	0.455932
AAEL013097	140	60S ribosomal protein L23 (L17A)(AeRpL17A)	Ribosomal_L14P;Ribosomal_L14P_CS	IPR000218;IPR019972	GO:0003735;GO:0006412;GO:0005840	11.27	14988.5	2056.1	AAEL013097-PA	2	1.42857	4	2.85714	18.57	0			3417.5	1683	19638.7	24739.2	1406	1211	621	2264.09	1950.08	0.215398	3.14799	3.29005	6.64495	0.455932
AAEL007549	211	phosphatidylethanolamine-binding protein	PEBP	IPR008914		7.3	23327.3	3824.13	AAEL007549-PA	6	2.8436	6	2.8436	41.71	0			17942.8	6407.33	3494	27844.2	142	165	765	185.621	215.686	-0.216575	2.15229	2.33382	4.60245	0.453869
AAEL015458	633	transferrin	Transferrin-like_dom;Transferrin;Transferrin_Fe_BS	IPR001156;IPR016357;IPR018195	GO:0005615;GO:0005576	7.43	71701.3	3232.79	AAEL015458-PA	14	2.21169	18	2.8436	20.85	0	SignalP-noTM		36735.3	21178.6	11539.2	69453.1	348	1600	2263	153.778	707.026	-2.20091	2.54158	2.84944	5.03633	0.453869
AAEL009142	775	prolyl endopeptidase (prolyl oligopeptidase)	Peptidase_S9;Peptidase_S9A;Pept_S9_AS;Pept_S9A_N;AB_hydrolase	IPR001375;IPR002470;IPR002471;IPR023302;IPR029058	GO:0006508;GO:0004252;GO:0008236;GO:0070008	6.24	88871.4	766.129	AAEL009142-PA	16	2.06452	22	2.83871	25.16	0.0029			20466.5	12808.4	4682.78	37957.7	1159	724	3390	341.888	213.569	0.678819	3.06408	2.32954	4.86342	0.453121
AAEL009420	495	Class B Scavenger Receptor (CD36 domain).	CD36_fam	IPR002159	GO:0016020;GO:0016021	4.61	56131.7	4013.53	AAEL009420-PA	11	2.22222	14	2.82828	29.09	0		TMhelix	20174.5	25261.2	7827.36	53263	22	156	1488	14.7849	104.839	-2.82597	1.34242	2.02052	3.19034	0.451523
AAEL010661	355	phospholipid scramblase 1,	Scramblase;Tubby_C-like	IPR005552;IPR025659		4.93	38862.7	2735.35	AAEL010661-PA	9	2.53521	10	2.8169	23.66	0			16439.3	39365.8	18932.2	74737.3	357	468	2491	143.316	187.876	-0.390584	2.55267	2.27387	4.43017	0.449772
AAEL000915	462		DUF753	IPR008472		5.17	53765.6	500.565	AAEL000915-PA	10	2.1645	13	2.81385	29.65	0.0074	SignalP-noTM		7951.33	8353.67	4340.25	20645.3	79	570	2412	32.7529	236.318	-2.85104	1.89763	2.3735	3.88875	0.449301
AAEL014110	571	sulfite reductase	OxRdtase_Mopterin-bd_dom;Cyt_B5-like_heme/steroid-bd;MoCF_OxRdtse_dimer;Mopterin_OxRdtase_euk;Ig_E-set	IPR000572;IPR001199;IPR005066;IPR008335;IPR014756	GO:0016491;GO:0055114;GO:0042128;GO:0030151	7.13	63692	840.494	AAEL014110-PA	11	1.92644	16	2.8021	20.67	0			22009.8	21783.1	14775.4	58568.4	137	106	2342	58.497	45.2605	0.370112	2.13672	1.65572	3.42285	0.447484
AAEL008274	286		VWF_dom	IPR001007	GO:0005515	4.44	33324.5	825.281	AAEL008274-PA	7	2.44755	8	2.7972	26.22	0	SignalP-noTM		23207	12126.3	7187.75	42521.1	296	333	861	343.786	386.76	-0.169925	2.47129	2.58744	5.12373	0.446724
AAEL003056	501	brain chitinase and chia	Glyco_hydro18_cat;Glyco_hydro_18_chit_AS;Chitinase_II;Glycoside_hydrolase_SF;Chitinase_insertion	IPR001223;IPR001579;IPR011583;IPR017853;IPR029070	GO:0005975;GO:0004553;GO:0008061	5.07	56210.4	865.389	AAEL003056-PA	11	2.19561	14	2.79441	35.13	0	SignalP-noTM		13510.5	11414.8	7068.06	31993.4	184	185	1569	117.272	117.909	-0.0078195	2.26482	2.07155	4.14074	0.44629
AAEL004294	503	dihydrolipoamide acetyltransferase component of pyruvate dehydrogenase	Biotin_lipoyl;2-oxoacid_DH_actylTfrase;2-oxoA_DH_lipoyl-BS;E3-bd;LAT1;Single_hybrid_motif	IPR000089;IPR001078;IPR003016;IPR004167;IPR006257;IPR011053	GO:0016746;GO:0008152;GO:0006090;GO:0004742;GO:0045254	9.15	54289.3	1084.47	AAEL004294-PA	9	1.78926	14	2.7833	23.86	0			9326.83	14681.6	13735.6	37744	1366	2652	2737	499.087	968.944	-0.957123	3.13545	2.9863	5.68447	0.44456
AAEL013694	288	40S ribosomal protein SA [Source:UniProtKB/Swiss-Prot;Acc:Q16ZR8]	Ribosomal_S2;Ribosomal_S2_euk/arc;Ribosomal_S2_CS;Ribosomal_S2_flav_dom;Ribosomal_S2_euk;40S_SA_C	IPR001865;IPR005707;IPR018130;IPR023591;IPR027498;IPR032281	GO:0003735;GO:0006412;GO:0005622;GO:0005840;GO:0015935	4.71	31701.8	1041.32	AAEL013694-PA	5	1.73611	8	2.77778	29.86	0			20051	12450	11102.2	43603.2	2711	3335	1032	2626.94	3231.59	-0.298862	3.43313	3.50942	6.92887	0.443697
AAEL006953	289		Chitin-bd_dom	IPR002557	GO:0005576;GO:0008061;GO:0006030	4.2	31377.5	4707.27	AAEL006953-PA	5	1.7301	8	2.76817	27.68	0	SignalP-noTM		56778.2	35141.5	48362.7	140282	4072	4264	994	4096.58	4289.74	-0.0664699	3.60981	3.63243	7.24485	0.442192
AAEL006833	327	succinyl-CoA synthetase small subunit, putative	CoA-bd;CoA_lig_alpha;CoA_ligase;NAD(P)-bd_dom;Succinyl-CoA_synth-like;Cit_synth/succinyl-CoA_lig_AS;Citrt_syn/SCS-alpha_CS	IPR003781;IPR005810;IPR005811;IPR016040;IPR016102;IPR017440;IPR033847	GO:0003824;GO:0005739;GO:0008152;GO:0000166;GO:0048037;GO:0006099;GO:0004776;GO:0004775	9.4	34815.1	1590.8	AAEL006833-PA	7	2.14067	9	2.75229	24.46	0			10709.3	2941.67	5438.56	19089.6	1739	2911	2322	748.923	1253.66	-0.743257	3.2403	3.09818	5.97262	0.439695
AAEL013279	219	peptidyl-prolyl cis-trans isomerase (cyclophilin)	Cyclophilin-type_PPIase_dom;Cyclophilin-type_PPIase_CS;Cyclophilin-type_PPIase;Cyclophilin-like_dom	IPR002130;IPR020892;IPR024936;IPR029000	GO:0006457;GO:0003755;GO:0000413	6.78	24030.2	2319.76	AAEL013279-PA	6	2.73973	6	2.73973	38.36	0			22432.5	8225.67	3747.67	34405.8	836	1078	1194	700.168	902.848	-0.366782	2.92221	2.95561	5.80082	0.437707
AAEL010608	659	Succinate dehydrogenase (quinone) (Fragment) [Source:UniProtKB/TrEMBL;Acc:Q16SE4]	FRD_SDH_FAD_BS;FAD-binding_2;Succ_DH_flav_su_fwd;Succ_Dhase_FrdA_Gneg;Fum_Rdtase/Succ_DH_flav-like_C;FAD/NAD-binding_dom;Succ_DH/fumarate_Rdtase_cat	IPR003952;IPR003953;IPR011281;IPR014006;IPR015939;IPR023753;IPR027477	GO:0016020;GO:0016491;GO:0055114;GO:0050660;GO:0016627;GO:0006099;GO:0022900;GO:0008177	6.36	72852.9	1675.5	AAEL010608-PA	13	1.97269	18	2.73141	31.26	0			4799.33	2288.5	10398.5	17486.3	2356	3297	1980	1189.9	1665.15	-0.484814	3.37218	3.22145	6.29696	0.436387
AAEL002879	517	heterogeneous nuclear ribonucleoprotein r	RRM_dom;HnRNP_R/Q_splicing_fac	IPR000504;IPR006535	GO:0003676	8.62	57865.7	512.782	AAEL002879-PA	10	1.93424	14	2.70793	27.66	0.0074			8540.5	7714.33	6250.44	22505.3	867	926	2841	305.174	325.942	-0.0949802	2.93802	2.51314	4.99769	0.432637
AAEL007926	446	retinoid-inducible serine carboxypeptidase (serine carboxypeptidase	Peptidase_S10;Ser_caboxypep_ser_AS;AB_hydrolase	IPR001563;IPR018202;IPR029058	GO:0006508;GO:0004185	4.67	50118.3	1064.12	AAEL007926-PA	9	2.01794	12	2.69058	23.99	0	SignalP-noTM		22799.2	19654.5	18188.8	60642.4	1259	511	1412	891.643	361.898	1.30088	3.10003	2.55859	5.50878	0.429846
AAEL005170	409	cytochrome c oxidase subunit iv	Cyt_c_oxidase_su4_fam;Cyt_c_oxidase_su4	IPR004203;IPR013288	GO:0016021;GO:0004129	6.23	46954.7	3430.95	AAEL005170-PA	7	1.71149	11	2.68949	21.27	0		TMhelix	10999.5	14040.2	24659.3	49699	1475	2488	1978	745.703	1257.84	-0.754272	3.16879	3.09962	5.97219	0.429669
AAEL000200	112		SVWC_dom	IPR029277		5.88	12861.4	4939.58	AAEL000200-PA	3	2.67857	3	2.67857	38.39	0	SignalP-noTM	TMhelix	37715.5	14319.5	8930.5	60965.5	181	573	445	406.742	1287.64	-1.66255	2.25768	3.10979	5.71911	0.427903
AAEL012585	263	60S ribosomal protein L7	Ribosomal_L7_euk;Ribosomal_L30_N;Ribosomal_L30_ferredoxin-like;Ribosomal_L30_CS	IPR005998;IPR012988;IPR016082;IPR018038	GO:0005840	11.2	30395.1	1771.52	AAEL012585-PA	5	1.90114	7	2.6616	20.15	0			35725.7	18832.3	16753.6	71311.6	11596	18923	957	12117	19773.2	-0.706514	4.06431	4.29608	8.37947	0.425142
AAEL000556	151	C-Type Lectin (CTL25)	C-type_lectin-like;C-type_lectin-like/link;CTDL_fold	IPR001304;IPR016186;IPR016187	GO:0030246	9.42	17656.2	2271.54	AAEL000556-PA	4	2.64901	4	2.64901	31.13	0	SignalP-noTM		25181.5	17823.8	28703.4	71708.7	263	283	456	576.754	620.614	-0.105739	2.41996	2.79282	5.55381	0.423083
AAEL006834	801	glutamate semialdehyde dehydrogenase	GPR_dom;Asp/Glu/Uridylate_kinase;Glu/AcGlu_kinase;Glu_5kinase/COase_Synthase;P5_carboxy_syn;Aldehyde_DH_dom;Ald_DH/histidinol_DH;Ald_DH_N;Glutamate_5-kinase_CS	IPR000965;IPR001048;IPR001057;IPR005715;IPR005766;IPR015590;IPR016161;IPR016162;IPR019797	GO:0016491;GO:0055114;GO:0003824;GO:0006561;GO:0005737;GO:0008152;GO:0050661;GO:0004350;GO:0004349	7	87586.2	1108.91	AAEL006834-PA	16	1.9975	21	2.62172	33.08	0			10788.2	8029.5	17885.7	36703.4	169	4058	2858	59.1323	1419.87	-4.58567	2.22789	3.15225	4.92408	0.418587
AAEL007432	268	serine collagenase 1 precursor, putative	Trypsin_dom;Peptidase_S1A;Peptidase_S1_PA	IPR001254;IPR001314;IPR009003	GO:0006508;GO:0004252	4.71	30375.7	1890.31	AAEL007432-PA	6	2.23881	7	2.61194	26.12	0	SignalP-noTM		28556	13730.5	14453.4	56739.9	33675	103	959	35114.7	107.404	8.35289	4.52731	2.03102	6.57651	0.416963
AAEL010975	883	paramyosin, long form	Myosin_tail	IPR002928	GO:0003774;GO:0016459	5.33	103454	723.883	AAEL010975-PA	16	1.812	23	2.60476	23.9	0.0029			7487.67	8001.58	13160.3	28649.6	3612	10300	5185	696.625	1986.5	-1.51177	3.55775	3.29809	6.14109	0.415767
AAEL013628	309	trypsin-eta, putative	Trypsin_dom;Peptidase_S1A;Peptidase_S1_PA;TRYPSIN_HIS;TRYPSIN_SER	IPR001254;IPR001314;IPR009003;IPR018114;IPR033116	GO:0006508;GO:0004252	7.96	33994.6	3942.35	AAEL013628-PA	6	1.94175	8	2.589	37.22	0	SignalP-noTM		28848	53534.5	24904.9	107287	81	260	974	83.1622	266.94	-1.68252	1.90849	2.42641	4.34634	0.413132
AAEL011025	348	vacuolar ATP synthase subunit ac39	ATPase_V0-cplx_csu/dsu;ATPase_V0-cplx_dsu;V-type_ATPase_suC	IPR002843;IPR016727;IPR035067	GO:0015078;GO:0015991;GO:0033179	4.64	40266.8	479.619	AAEL011025-PA	7	2.01149	9	2.58621	23.56	0.0093			7325.83	14173.8	11347.6	32847.2	1625	1623	1680	967.262	966.071	0.00177672	3.21085	2.98501	5.97055	0.412663
AAEL002720	387	Serine Protease Inhibitor (serpin) likely cleavage at V/V.	Serpin_fam;Serpin_CS;Serpin_dom	IPR000215;IPR023795;IPR023796	GO:0005615	4.99	43958.4	735.648	AAEL002720-PA	8	2.06718	10	2.58398	27.13	0.0029	SignalP-noTM		12354.8	8048.67	11021.9	31425.4	257	667	1164	220.79	573.024	-1.37592	2.40993	2.75817	5.10215	0.412289
AAEL006169	387	Lysosomal aspartic protease Precursor (EC 3.4.23.-)	Aspartic_peptidase_A1;Aspartic_peptidase_AS;Peptidase_aspartic_dom;PEPTIDASE_A1;Cathepsin_D;Cathepsin_D-like	IPR001461;IPR001969;IPR021109;IPR033121;IPR033144;IPR034129	GO:0006508;GO:0004190;GO:0005764	5.05	42189	730.652	AAEL006169-PA	6	1.55039	10	2.58398	19.38	0.0029	SignalP-noTM		18781.2	12556.2	22334.7	53672	955	1250	1403	680.684	890.948	-0.388355	2.98	2.94985	5.7828	0.412289
AAEL005722	349	60S ribosomal protein L7a	Ribosomal_L7A/L8;Ribosomal_L7Ae_CS;Ribosomal_L7Ae/L30e/S12e/Gad45;Ribosomal_L7Ae/L8/Nhp2;L30e-like	IPR001921;IPR004037;IPR004038;IPR018492;IPR029064	GO:0005840;GO:0042254;GO:0030529	10.67	39518.7	487.688	AAEL005722-PA	9	2.5788	9	2.5788	23.5	0.0074			14498.8	2869.83	6424.72	23793.4	20169	30220	1172	17209	25785	-0.583364	4.30468	4.41137	8.64712	0.411417
AAEL010537	582	alpha-amylase	Glyco_hydro_13_cat_dom;Glycoside_hydrolase_SF	IPR006047;IPR017853	GO:0005975;GO:0003824	4.89	66982.9	815.576	AAEL010537-PA	11	1.89003	15	2.57732	25.6	0	SignalP-noTM		21650.3	31276.2	17988.6	70915.1	69	434	1868	36.9379	232.334	-2.65303	1.83885	2.36611	3.93359	0.411168
AAEL011821	234	adenylyl cyclase-associated protein	Adenylate_cyclase-assoc_CAP;CARP_motif;Adenylate_cyclase-assoc_CAP_C;C-CAP_CF_C-like;CAP_CS_C	IPR001837;IPR006599;IPR013912;IPR017901;IPR028417	GO:0003779;GO:0007010	7.9	23175.5	858.096	AAEL011821-PB	6	2.5641	6	2.5641	28.91	0			9594	3587.67	0	13181.7	13	20	1494	8.70147	13.3869	-0.621488	1.11394	1.12668	2.06628	0.408935
AAEL002539	706	fimbrin/plastin	Actinin_actin-bd_CS;CH-domain;EF_hand_dom;EF-hand-dom_pair;EF_Hand_1_Ca_BS	IPR001589;IPR001715;IPR002048;IPR011992;IPR018247	GO:0005509;GO:0003779;GO:0005515	4.91	78808.7	485.152	AAEL002539-PA	14	1.983	18	2.54958	23.51	0.0074			12357.2	8206.17	10519.3	31082.6	586	975	2121	276.285	459.689	-0.734502	2.7679	2.66246	5.10382	0.406468
AAEL003835	160	initiation factor 5a	Transl_elong_IF5A;Translation_prot_SH3-like;NA-bd_OB-fold;Rib_L2_dom2;Trans_elong_IF5A_hypusine_site;Transl_elong_IF5A_C	IPR001884;IPR008991;IPR012340;IPR014722;IPR019769;IPR020189	GO:0003723;GO:0003743;GO:0003746;GO:0043022;GO:0045901;GO:0006452;GO:0045905	5.17	17866	775.027	AAEL003835-PA	4	2.5	4	2.5	39.38	0			9102.58	4687.42	10717.3	24507.3	10115	9945	1825	5542.47	5449.32	0.024453	4.00497	3.73634	7.48004	0.39794
AAEL007201	1001	glutamyl aminopeptidase	Peptidase_M1;Peptidase_M1_N;ERAP1-like_C_dom;M1_APN-typ	IPR001930;IPR014782;IPR024571;IPR034016	GO:0008270;GO:0006508;GO:0004177;GO:0008237	5.84	114155	330.718	AAEL007201-PA	18	1.7982	25	2.4975	22.38	0.0243		TMhelix	24088.7	18386.2	11310.1	53784.9	2574	2044	3060	841.176	667.974	0.332617	3.41061	2.82476	5.74965	0.397506
AAEL009414	401	NADH-ubiquinone oxidoreductase 39 kda subunit	Epimerase_deHydtase;NAD(P)-bd_dom	IPR001509;IPR016040	GO:0003824;GO:0050662	9.15	46352.9	688.475	AAEL009414-PA	8	1.99501	10	2.49377	31.42	0.0029			52031	27023.5	18680.4	97734.9	1500	3026	1511	992.72	2002.65	-1.01245	3.17609	3.3016	6.29843	0.396856
AAEL000028	362	Clip-Domain Serine Protease family B.	Trypsin_dom;Peptidase_S1A;Peptidase_S1_PA;TRYPSIN_HIS;CLIP;TRYPSIN_SER	IPR001254;IPR001314;IPR009003;IPR018114;IPR022700;IPR033116	GO:0006508;GO:0004252	7.5	40568.4	404.281	AAEL000028-PA	7	1.9337	9	2.48619	21.55	0.0197	SignalP-noTM		6101.33	2800.5	6088.06	14989.9	734	1897	1089	674.013	1741.97	-1.36987	2.8657	3.24104	6.06971	0.395534
AAEL012578	362	Phosphoserine aminotransferase [Source:UniProtKB/TrEMBL;Acc:Q16LP7]	Aminotrans_V_dom;PyrdxlP-dep_Trfase_major_sub1;PyrdxlP-dep_Trfase_sub2;PyrdxlP-dep_Trfase;Aminotrans_V_PyrdxlP_BS;Pser_aminoTfrase	IPR000192;IPR015421;IPR015422;IPR015424;IPR020578;IPR022278	GO:0003824;GO:0004648;GO:0006564	9.06	39755.8	487.502	AAEL012578-PA	5	1.38122	9	2.48619	18.23	0.0074			84871	62412	27550	174833	2197	236	1260	1743.65	187.302	3.21868	3.34183	2.27254	5.514	0.395534
AAEL002759	284	tropomyosin invertebrate	Tropomyosin	IPR000533		4.63	32636.6	1555.34	AAEL002759-PA	6	2.11268	7	2.46479	20.77	0			10554.5	6824.17	4522	21900.7	3664	10456	3334	1098.98	3136.17	-1.51284	3.56396	3.4964	6.53739	0.39178
AAEL011741	203	glutathione transferase	Glutathione_S-Trfase_N;GST_C;Glutathione-S-Trfase_C-like;Thioredoxin-like_fold	IPR004045;IPR004046;IPR010987;IPR012336	GO:0005515	4.8	23263.8	1385.83	AAEL011741-PA	4	1.97044	5	2.46305	23.65	0			5037	1802.25	8988.94	15828.2	940	1871	612	1535.95	3057.19	-0.993077	2.97313	3.48532	6.6717	0.391474
AAEL001690	245	serine-type enodpeptidase	Trypsin_dom;Peptidase_S1A;Peptidase_S1_PA;TRYPSIN_HIS	IPR001254;IPR001314;IPR009003;IPR018114	GO:0006508;GO:0004252	4.61	27391.5	1013.01	AAEL001690-PA	4	1.63265	6	2.44898	14.29	0	SignalP-noTM		9103.83	4742.5	7743.67	21590	9785	106	1117	8760.07	94.897	6.52844	3.99056	1.97725	5.91976	0.388985
AAEL001210	123	NADH ubiquinone oxidoreductase subunit, putative	NDUFS6;Znf_CHCC	IPR016668;IPR019401	GO:0055114;GO:0006120;GO:0005743;GO:0005747;GO:0070469	8.62	13967.9	1351.09	AAEL001210-PA	3	2.43902	3	2.43902	30.89	0			0	0	2508.33	2508.33	591	1057	568	1040.49	1860.92	-0.838745	2.77159	3.26973	6.28697	0.387216
AAEL013629	287	trypsin-alpha, putative	Trypsin_dom;Peptidase_S1A;Peptidase_S1_PA	IPR001254;IPR001314;IPR009003	GO:0006508;GO:0004252	6.42	30389.9	4523.53	AAEL013629-PA	6	2.09059	7	2.43902	42.51	0	SignalP-noTM		34237.3	70888.9	33703.5	138830	96	239	1321	72.6722	180.924	-1.3159	1.98227	2.2575	4.11886	0.387216
AAEL014562	165	60S ribosomal protein L12	Ribosomal_L11/L12;Ribosomal_L11_C;Ribosomal_L11_N;Ribosomal_L11_CS	IPR000911;IPR020783;IPR020784;IPR020785	GO:0003735;GO:0006412;GO:0005840	9.33	17851.6	1382.56	AAEL014562-PA	4	2.42424	4	2.42424	35.76	0			8988.75	4040.5	6083.47	19112.7	7106	11580	498	14269.1	23253	-0.704526	3.85163	4.36648	8.52088	0.384576
AAEL000494	124	Histone H2A [Source:UniProtKB/TrEMBL;Acc:Q173V2]	Histone_H2A;Histone_H2A/H2B/H3;Histone-fold;Histone_H2A_C;Histone_H2A_CS	IPR002119;IPR007125;IPR009072;IPR032454;IPR032458	GO:0003677;GO:0005634;GO:0000786;GO:0046982	11.15	13362.7	4789.06	AAEL000494-PA	2	1.6129	3	2.41935	14.52	0			25936.8	7446.25	14172.7	47555.8	0	0	375	0	0					0.3837
AAEL017378	751	Elongation factor Tu [Source:UniProtKB/TrEMBL;Acc:J9HFE1]	TF_GTP-bd_dom;Transl_elong_EFTu/EF1A_C;EFTu-like_2;Transl_elong_EFTu/EF1A_bac/org;Transl_B-barrel;Transl_elong_EF1A/Init_IF2_C;P-loop_NTPase;G_TR_CS;EFTU_2	IPR000795;IPR004160;IPR004161;IPR004541;IPR009000;IPR009001;IPR027417;IPR031157;IPR033720	GO:0005622;GO:0003924;GO:0005525;GO:0003746;GO:0006414	6.54	85060.4	1760.97	AAEL017378-PA	12	1.59787	18	2.3968	23.44	0			77143.5	30364.5	27611.8	135120	133	69	2256	58.9539	30.5851	0.946758	2.12385	1.48551	3.25602	0.379633
AAEL004616	376	actin	Actin;Actin_CS;Actin/actin-like_CS	IPR004000;IPR004001;IPR020902	GO:0005524	5.15	42085	12272.9	AAEL004616-PA	7	1.8617	9	2.39362	22.34	0			15686.5	11645.5	10313.3	37645.3	512	1283	1200	426.667	1069.17	-1.32531	2.70927	3.02905	5.65913	0.379055
AAEL002761	253	tropomyosin invertebrate	Tropomyosin	IPR000533		4.62	29241.9	1529.15	AAEL002761-PA	2	0.790514	6	2.37154	8.7	0			5847.5	18295	5962	30104.5	4439	10051	1066	4164.17	9428.71	-1.17903	3.64729	3.97445	7.59398	0.375031
AAEL004313	211	fk506-binding protein	PPIase_FKBP_dom;EF_hand_dom;EF-hand-dom_pair;EF_Hand_1_Ca_BS;PPIase_FKBP	IPR001179;IPR002048;IPR011992;IPR018247;IPR023566	GO:0005509;GO:0003755	4.5	23475.4	698.731	AAEL004313-PA	4	1.89573	5	2.36967	19.91	0.0029	SignalP-noTM		24174.8	13350.2	6587.5	44112.5	606	203	1904	318.277	106.618	1.57784	2.78247	2.02783	4.53064	0.374688
AAEL001020	338	anterior fat body protein	SMP-30;6-blade_b-propeller_TolB-like;SGL	IPR005511;IPR011042;IPR013658		5.23	36963	488.163	AAEL001020-PA	6	1.77515	8	2.36686	26.63	0.0074	SignalP-TM	TMhelix	29868	21546.1	7229	58643.1	318	449	1378	230.769	325.835	-0.497689	2.50243	2.513	4.87618	0.374173
AAEL006070	255	Phosphoglycerate mutase [Source:UniProtKB/TrEMBL;Acc:Q177P3]	PG/BPGM_mutase_AS;Phosphogly_mut1;His_Pase_superF_clade-1;His_PPase_superfam	IPR001345;IPR005952;IPR013078;IPR029033	GO:0006096;GO:0003824;GO:0008152;GO:0016868;GO:0004619;GO:0004082	6.37	28612.8	939.617	AAEL006070-PA	5	1.96078	6	2.35294	25.88	0			6987.5	4075.17	3351	14413.7	1270	4400	1084	1171.59	4059.04	-1.79268	3.1038	3.60842	6.6772	0.371611
AAEL000424	510	leucine aminopeptidase	Peptidase_M17_C;Peptidase_M17_N;Leucine_aapep/pepB;Peptidase_M17_leu_NH2_pept	IPR000819;IPR008283;IPR011356;IPR023042	GO:0005622;GO:0008235;GO:0006508;GO:0005737;GO:0004177;GO:0019538;GO:0030145	6.03	55567.2	767.915	AAEL000424-PA	9	1.76471	12	2.35294	20.2	0.0029			9170.83	6306.5	1473.83	16951.2	1034	1155	1784	579.596	647.422	-0.159657	3.01452	2.81119	5.57431	0.371611
AAEL009637	340	cathepsin b	Pept_cys_AS;Peptidase_C1A_C;Propeptide_C1A;Peptidase_C1A;Pept_his_AS;Pept_asp_AS	IPR000169;IPR000668;IPR012599;IPR013128;IPR025660;IPR025661	GO:0006508;GO:0008234;GO:0004197;GO:0050790	6.58	38245.9	389.57	AAEL009637-PA	6	1.76471	8	2.35294	20.59	0.0197	SignalP-noTM		13904.2	10653	14833.7	39390.9	1315	1340	1308	1005.35	1024.46	-0.0271702	3.11893	3.0105	6.01282	0.371611
AAEL010782	427	carboxypeptidase	Peptidase_M14;M14A_act_pep;Peptidase/Inhibitor_I9;IGCP-like_CPD	IPR000834;IPR003146;IPR009020;IPR034223	GO:0008270;GO:0006508;GO:0004181;GO:0004180	5.45	48386.9	1053.67	AAEL010782-PA	8	1.87354	10	2.34192	24.36	0	SignalP-noTM		16188.5	7600.67	3391.25	27180.4	3773	1635	2215	1703.39	738.149	1.20642	3.57669	2.86814	6.09946	0.369572
AAEL008216	901	aconitase	AconitaseA/IPMdHydase_ssu_swvl;Acoase/IPM_deHydtase_lsu_aba;Aconitase/IRP2;Aconitase/3IPM_dehydase_swvl;Acnase/IPM_dHydase_lsu_aba_1/3;Aconitase/IPMdHydase_lsu_aba_2;Aconitase_4Fe-4S_BS;IRE-BP1	IPR000573;IPR001030;IPR006249;IPR015928;IPR015931;IPR015932;IPR018136;IPR029784	GO:0051539;GO:0008152;GO:0006879;GO:0003994;GO:0010040;GO:0005623	5.73	99314.2	553.739	AAEL008216-PA	16	1.7758	21	2.33074	24.97	0.0053			16226	32401.5	41844.4	90471.9	1903	1101	3413	557.574	322.59	0.789461	3.27944	2.50865	5.25495	0.367495
AAEL000392	519	maltase	Glyco_hydro_13_cat_dom;Glycoside_hydrolase_SF	IPR006047;IPR017853	GO:0005975;GO:0003824;GO:0004558;GO:0032450	5.65	60033.5	9738.55	AAEL000392-PA	12	2.31214	12	2.31214	19.65	0			55001.7	38075.3	14980.1	108057	1789	3114	2020	885.644	1541.58	-0.799616	3.25261	3.18797	6.13523	0.364014
AAEL010590	436	aldose-1-epimerase	Aldose_1/G6P_1-epimerase;Gal_mutarotase_SF_dom;GH-type_carb-bd;Aldose_1-epimerase;Ald1_epimerase_CS	IPR008183;IPR011013;IPR014718;IPR015443;IPR018052	GO:0019318;GO:0005975;GO:0003824;GO:0016853;GO:0030246	5.74	47655	1444.53	AAEL010590-PA	8	1.83486	10	2.29358	25.69	0			14653	11661.8	3240	29554.8	139	229	2556	54.3818	89.5931	-0.720263	2.14301	1.95227	3.68773	0.360514
AAEL010065	437	protein disulfide-isomerase A6 precursor	Disulphide_isomerase;Thioredoxin-like_fold;Thioredoxin_domain;Thioredoxin_CS	IPR005788;IPR012336;IPR013766;IPR017937	GO:0016853;GO:0045454;GO:0005623	5.01	48236.2	750.629	AAEL010065-PA	6	1.373	10	2.28833	17.85	0.0029	SignalP-noTM		27230.2	22578.8	27811.9	77620.9	1585	511	1607	986.31	317.984	1.63309	3.20003	2.50241	5.49642	0.359519
AAEL005931	482	6-phosphogluconate dehydrogenase, decarboxylating [Source:UniProtKB/TrEMBL;Acc:Q178E4]	6PGDH_Gnd/GntZ;6PGDH_C;6PGDH_NADP-bd;Pgluconate_DH;6PGdom_BS;6-PGluconate_DH_C-like;6PGD_dom_2;NAD(P)-bd_dom	IPR006113;IPR006114;IPR006115;IPR006183;IPR006184;IPR008927;IPR013328;IPR016040	GO:0016491;GO:0055114;GO:0006098;GO:0004616;GO:0019521	7.58	53513.3	755.355	AAEL005931-PA	9	1.86722	11	2.28216	24.48	0.0029			19518.8	11197.3	11820.8	42536.9	1925	1515	2244	857.843	675.134	0.345541	3.28443	2.82939	5.7628	0.358346
AAEL010014	2114		Cadherin;Ig-like_fold;Cadherin-like;Cadherin_CS	IPR002126;IPR013783;IPR015919;IPR020894	GO:0016020;GO:0016021;GO:0005509;GO:0007156;GO:0007155;GO:0005886	4.44	235001	786.802	AAEL010014-PA	39	1.84484	48	2.27058	19.73	0		TMhelix	25005.7	23024.3	10376.9	58406.9	180	1134	6402	28.1162	177.132	-2.65535	2.25527	2.2483	3.69726	0.356136
AAEL011584	574	chaperonin-60kD, ch60	Chaprnin_Cpn60;Cpn60/TCP-1;Chaperonin_Cpn60_CS;GroEL-like_apical_dom;GROEL-like_equatorial	IPR001844;IPR002423;IPR018370;IPR027409;IPR027413	GO:0005524;GO:0005737;GO:0006457;GO:0042026	5.3	61193.1	731.779	AAEL011584-PA	13	2.26481	13	2.26481	33.28	0.0029			12851.5	17289.2	19279.1	49419.7	3283	1419	1725	1903.19	822.609	1.21014	3.51627	2.91519	6.19468	0.355031
AAEL007681	487	NADH-ubiquinone oxidoreductase flavoprotein 1 (ndufv1)	NADH-UbQ_OxRdtase_51kDa_CS;NADH-UbQ_OxRdtase_suF;Nuo51_FMN-bd;Soluble_ligand-bd;Nuop51_4Fe4S-bd	IPR001949;IPR011537;IPR011538;IPR019554;IPR019575	GO:0055114;GO:0008137;GO:0051539;GO:0010181;GO:0016651;GO:0051287	8.76	54074.7	267.264	AAEL007681-PA	8	1.64271	11	2.25873	27.93	0.0308			1412.75	5475	10629.4	17517.2	1809	3900	1832	987.445	2128.82	-1.10828	3.25744	3.32814	6.32265	0.353864
AAEL009201	89		Deltameth_res_prag01	IPR031973	GO:0016021	10.14	9993.49	523.942	AAEL009201-PA	2	2.24719	2	2.24719	35.96	0.0053		TMhelix	0	6707.5	10635.2	17342.8	2723	4585	461	5906.72	9945.77	-0.751725	3.43505	3.99764	7.76899	0.35164
AAEL011447	178	60S ribosomal protein L14 [Source:UniProtKB/TrEMBL;Acc:Q1HRP1]	Ribosomal_L14e_dom;Translation_prot_SH3-like;Rib_L2_dom2	IPR002784;IPR008991;IPR014722	GO:0003735;GO:0006412;GO:0005622;GO:0005840	11.51	20650.5	879.496	AAEL011447-PB	3	1.68539	4	2.24719	17.42	0			22051	9463.83	10528.8	42043.6	16179	21174	775	20876.1	27321.3	-0.388171	4.20895	4.4365	8.75615	0.35164
AAEL007752	90	cytochrome c oxidase, subunit VIIA, putative	Cyt_c_oxidase_su7a	IPR003177	GO:0009055;GO:0016021;GO:0004129;GO:0005746	9.95	9886.5	284.055	AAEL007752-PA	2	2.22222	2	2.22222	13.33	0.0308		TMhelix	0	7325.75	11939.2	19265	2276	2213	841	2706.3	2631.39	0.0404971	3.35717	3.42019	6.85256	0.346787
AAEL012364	720	spermatogenesis associated factor	CDC4_N-term_subdom;AAA+_ATPase;ATPase_AAA_core;ATPase_AAA_CS;Cdc48_dom2;Asp_de-COase-like_dom;P-loop_NTPase;CDC48_domain_2-like	IPR003338;IPR003593;IPR003959;IPR003960;IPR004201;IPR009010;IPR027417;IPR029067	GO:0005524	5.29	80339.7	756.335	AAEL012364-PA	15	2.08333	16	2.22222	28.19	0.0029			13932	12425	41980	68337	502	305	2160	232.407	141.204	0.718878	2.7007	2.14985	4.5161	0.346787
AAEL011276	315	mitochondrial glutamate carrier protein	Mit_carrier;Mitochondrial_sb/sol_carrier;Mt_carrier_dom	IPR002067;IPR018108;IPR023395	GO:0016021;GO:0055085	9.95	34340.4	363.225	AAEL011276-PA	5	1.5873	7	2.22222	18.73	0.0197		TMhelix	0	8166	10804.7	18970.7	726	565	1575	460.952	358.73	0.361719	2.86094	2.55477	5.21842	0.346787
AAEL006642	450	Tubulin alpha chain [Source:UniProtKB/TrEMBL;Acc:Q1HR53]	Tubulin;Alpha_tubulin;Tubulin_FtsZ_GTPase;Tub_FtsZ_C;Tubulin_CS;Tubulin/FtsZ_2-layer-sand-dom	IPR000217;IPR002452;IPR003008;IPR008280;IPR017975;IPR018316	GO:0007017;GO:0005874;GO:0003924;GO:0005525;GO:0005737;GO:0005200	4.83	50592.8	8000.77	AAEL006642-PA	7	1.55556	10	2.22222	18.44	0			10387	12454	38251.6	61092.6	11883	9548	1575	7544.76	6062.22	0.315629	4.07493	3.78263	7.66028	0.346787
AAEL009387	453	hexokinase	Hexokinase;Hexokinase_BS;Hexokinase_N;Hexokinase_C	IPR001312;IPR019807;IPR022672;IPR022673	GO:0006096;GO:0005524;GO:0005975;GO:0016773;GO:0004396;GO:0005536;GO:0001678;GO:0046835;GO:0005623	5.68	51297.7	1001.95	AAEL009387-PA	2	0.441501	10	2.20751	5.3	0			2443	1380	6241	10064	1185	2187	2011	589.259	1087.52	-0.884066	3.07372	3.03644	5.80674	0.343902
AAEL011803	318	prohibitin, putative	Band_7;Stomatin_fam	IPR001107;IPR001972	GO:0016020;GO:0016021	4.85	34832.8	1078.15	AAEL011803-PA	6	1.88679	7	2.20126	27.04	0		TMhelix	4591.58	15584	9010.06	29185.6	168	398	1385	121.3	287.365	-1.24431	2.22531	2.45843	4.54229	0.342671
AAEL006962	273		BGBP_N	IPR031756	GO:0030246	8.01	30937.9	2361.19	AAEL006962-PA	4	1.4652	6	2.1978	21.98	0	SignalP-noTM		12623.2	6234.67	3819.5	22677.3	99	316	1127	87.8438	280.39	-1.67442	1.99564	2.44776	4.39148	0.341989
AAEL001863	412	zinc carboxypeptidase	Peptidase_M14;M14A_act_pep;Peptidase/Inhibitor_I9;IGCP-like_CPD	IPR000834;IPR003146;IPR009020;IPR034223	GO:0008270;GO:0006508;GO:0004181;GO:0004180	5.62	45996.9	504.194	AAEL001863-PA	7	1.69903	9	2.18447	18.45	0.0074	SignalP-noTM		22269.7	17596.5	8584.33	48450.5	4163	14728	1348	3088.28	10925.8	-1.82287	3.61941	4.03845	7.52817	0.339345
AAEL010168	275	40S ribosomal protein S2	Ribosomal_S5;Ribosomal_S5_C;Ribosomal_S5_euk/arc;Ribosomal_S5_N;Ribosomal_S5_D2-typ_fold_subgr;Ribosomal_S5_N_CS;Ribosomal_S5_D2-typ_fold	IPR000851;IPR005324;IPR005711;IPR013810;IPR014721;IPR018192;IPR020568	GO:0003735;GO:0006412;GO:0005840;GO:0003723;GO:0015935	10.71	30102	917.859	AAEL010168-PA	5	1.81818	6	2.18182	22.55	0			12499.5	12560.2	19161.1	44220.7	18880	19922	994	18994	20042.3	-0.0775037	4.276	4.30195	8.58056	0.338819
AAEL010143	370	Isocitrate dehydrogenase [NAD] subunit, mitochondrial [Source:UniProtKB/TrEMBL;Acc:Q16TS5]	Isocitrate_DH_NAD;IsoCit/isopropylmalate_DH_CS;IsoPropMal-DH-like_dom	IPR004434;IPR019818;IPR024084	GO:0055114;GO:0005739;GO:0000287;GO:0051287;GO:0016616;GO:0004449;GO:0006099	8.74	40963.1	503.748	AAEL010143-PA	6	1.62162	8	2.16216	24.32	0.0074			5088.5	3171.5	8271	16531	593	1322	1598	371.089	827.284	-1.15662	2.77305	2.91765	5.48713	0.334888
AAEL004156	279	fibrinogen and fibronectin	Fibrinogen_a/b/g_C_dom;Fibrinogen_a/b/g_C_2;Fibrinogen_a/b/g_C_1;Fibrinogen_CS	IPR002181;IPR014715;IPR014716;IPR020837		5.66	31497.1	1402.88	AAEL004156-PA	5	1.79211	6	2.15054	22.94	0	SignalP-noTM		9191.75	6924.17	12381.1	28497	26	2	1207	21.541	1.657	3.70044	1.41497	0.219323	1.55262	0.332547
AAEL002811	140				GO:0016021	5.67	15706.8	2771.68	AAEL002811-PA	3	2.14286	3	2.14286	22.86	0	SignalP-noTM	TMhelix	12834	46876.7	18775.8	78486.5	350	580	589	594.228	984.72	-0.728698	2.54407	2.99331	5.76727	0.330993
AAEL011381	468	NADH-ubiquinone oxidoreductase fe-s protein 2 (ndufs2)	NADH_Q_OxRdtase_suD;NADH_UbQ_OxRdtase_49kDa_CS;NDH1_su_D/H;NiFe_Hase-like	IPR001135;IPR014029;IPR022885;IPR029014	GO:0055114;GO:0016651;GO:0048038;GO:0051287	6.38	53234.1	806.304	AAEL011381-PA	8	1.7094	10	2.13675	23.72	0			0	1534	10963.2	12497.2	2679	5352	1753	1528.24	3053.05	-0.998384	3.42797	3.48473	6.66893	0.329754
AAEL009451	376	actin	Actin;Actin_CS;Actin/actin-like_CS	IPR004000;IPR004001;IPR020902	GO:0005524	5.23	41861.6	5644.32	AAEL009451-PA	4	1.06383	8	2.12766	9.84	0			8352.42	26470.5	20311.4	55134.4	2	11	1701	1.17578	6.46678	-2.45943	0.30103	0.810688	0.881058	0.327902
AAEL010071	286	spermidine synthase	Spermi_synthase;SAM-dependent_MTases;PABS_CS;PABS;Spermi_synthase_euk	IPR001045;IPR029063;IPR030373;IPR030374;IPR030668	GO:0006595;GO:0003824;GO:0016740;GO:0006596	5.43	32870.4	358.177	AAEL010071-PA	5	1.74825	6	2.0979	17.13	0.0197			7384.83	3927.25	3134.25	14446.3	544	251	1309	415.584	191.749	1.11592	2.7356	2.28273	4.90139	0.321785
AAEL006333	572	salivary apyrase, putative	Calcineurin-like_PHP_ApaH;5_nucleotidase/apyrase;5'-Nucleotdase_C;Metallo-depent_PP-like	IPR004843;IPR006179;IPR008334;IPR029052	GO:0016787;GO:0000166;GO:0009166	8.39	63923.2	964.212	AAEL006333-PA	9	1.57343	12	2.0979	16.78	0			11054.8	3143.75	13509.1	27707.6	381	424	1812	210.265	233.996	-0.154273	2.58092	2.36921	4.69197	0.321785
AAEL003746	479	4-Hydroxybutyrate CoA-transferase, putative	ActCoA_hydro;AcetylCoA_hyd_C	IPR003702;IPR026888	GO:0003824;GO:0006084	8.1	52134.6	892.995	AAEL003746-PA	7	1.46138	10	2.08768	21.29	0			22686.8	30208.2	10545.7	63440.7	1302	1864	2816	462.358	661.932	-0.517672	3.11461	2.82081	5.48579	0.319664
AAEL009432	486	Class B Scavenger Receptor (CD36 domain).	CD36_fam	IPR002159	GO:0016020;GO:0016021	4.64	56008.7	1919.76	AAEL009432-PA	6	1.23457	10	2.05761	15.64	0		TMhelix	37013.2	39716.3	19751.3	96480.8	157	108	1461	107.461	73.922	0.539733	2.1959	1.86877	3.90002	0.313364
AAEL015070	535	alkaline phosphatase	Alkaline_phosphatase;Alkaline_Pase-like_a/b/a;Alkaline_phosphatase_core	IPR001952;IPR017849;IPR017850	GO:0016791;GO:0003824;GO:0008152	5.78	58629.8	1151.63	AAEL015070-PA	9	1.68224	11	2.05607	19.44	0	SignalP-noTM		26306	15958.2	4762.06	47026.2	14	11	1628	8.59951	6.75676	0.347923	1.14613	0.829738	1.76422	0.313039
AAEL008857	438	deoxyribonuclease I, putative	DNA/RNA_non-sp_Endonuclease	IPR001604	GO:0016787;GO:0046872;GO:0003676	5.76	49041.2	774.517	AAEL008857-PA	7	1.59817	9	2.05479	24.43	0			25212.4	19109.2	13995.2	58316.8	217	260	1798	120.69	144.605	-0.260817	2.33646	2.16018	4.24185	0.312768
AAEL009634	196	steroid dehydrogenase	SDR_fam;NAD(P)-bd_dom	IPR002347;IPR016040		10.11	21645.4	722.128	AAEL009634-PE	3	1.53061	4	2.04082	17.86	0.0029			50329.5	18102.8	8577.89	77010.1	899	537	1313	684.692	408.987	0.743399	2.95376	2.61171	5.4472	0.309804
AAEL001432	493	protein disulfide isomerase	Disulphide_isomerase;Prot_disulphide_isomerase;Thioredoxin-like_fold;Thioredoxin_domain;Thioredoxin_CS	IPR005788;IPR005792;IPR012336;IPR013766;IPR017937	GO:0016853;GO:0005783;GO:0045454;GO:0003756	5.35	55587.9	901.506	AAEL001432-PA	8	1.62272	10	2.0284	19.47	0	SignalP-noTM		23868.3	12911.1	7316.33	44095.8	7631	3076	2241	3405.18	1372.6	1.31082	3.88258	3.13754	6.66968	0.307153
AAEL006785	148	60S ribosomal protein L18a [Source:UniProtKB/TrEMBL;Acc:Q174U3]	Ribosomal_L18a/L20_eukaryotes;Ribosomal_L18a//L18Ae/LX;50S_L18Ae/Ribosomal_L18a/L20	IPR021138;IPR023573;IPR028877	GO:0003735;GO:0006412;GO:0005840	11.14	17993.9	1607.71	AAEL006785-PA	2	1.35135	3	2.02703	16.22	0			4511.5	2150	5245.33	11906.8	9825	17580	1123	8748.89	15654.5	-0.839406	3.99233	4.19464	8.13659	0.30686
AAEL004325	297	60S ribosomal protein L5 [Source:UniProtKB/Swiss-Prot;Acc:Q1HQU2]	Rbsml_L5_euk/L18_arc;Rbsml_L5e/L18P_C	IPR005485;IPR025607	GO:0003735;GO:0006412;GO:0005622;GO:0005840;GO:0008097	10.05	34333.4	904.581	AAEL004325-PA	5	1.6835	6	2.0202	26.6	0			10199.1	3928.75	10034.2	24162	28290	35422	1250	22632	28337.6	-0.324353	4.45163	4.45236	8.80709	0.305395
AAEL006423	149		PBP_GOBP	IPR006170	GO:0005549	8.84	18133	702.874	AAEL006423-PA	3	2.01342	3	2.01342	18.79	0.0029	SignalP-noTM	TMhelix	8412.42	5663.67	13156.9	27233	803	876	681	1179.15	1286.34	-0.125531	2.90472	3.10936	6.18093	0.303935
AAEL003512	249	aquaporin (AQP1(Ae.a	MIP;MIP_CS;Aquaporin-like;Aquaporin_transptr	IPR000425;IPR022357;IPR023271;IPR034294	GO:0016020;GO:0016021;GO:0005215;GO:0006810	6.49	26264.5	4563.91	AAEL003512-PA	3	1.20482	5	2.00803	16.47	0		TMhelix	8594	30126.8	11209.9	49930.7	561	2274	4519	124.143	503.209	-2.01916	2.74896	2.70175	4.79567	0.302771
AAEL005052	449	Tubulin beta chain [Source:UniProtKB/TrEMBL;Acc:Q17B46]	Tubulin;Beta_tubulin;Tubulin_FtsZ_GTPase;Tub_FtsZ_C;Beta-tubulin_BS;Tubulin_CS;Tubulin/FtsZ_2-layer-sand-dom	IPR000217;IPR002453;IPR003008;IPR008280;IPR013838;IPR017975;IPR018316	GO:0007017;GO:0005874;GO:0003924;GO:0005525;GO:0005737;GO:0005200	4.59	51114.3	3995.35	AAEL005052-PB	8	1.78174	9	2.00445	26.28	0			4344.42	5274.5	13856.6	23475.5	388	816	2469	157.149	330.498	-1.07251	2.58883	2.51917	4.71548	0.301996
AAEL003313	556	Alkaline phosphatase [Source:UniProtKB/TrEMBL;Acc:Q17FS6]	Alkaline_phosphatase;Alkaline_Pase-like_a/b/a;Alkaline_phosphatase_core;Alkaline_phosphatase_AS	IPR001952;IPR017849;IPR017850;IPR018299	GO:0016791;GO:0003824;GO:0008152;GO:0004035	5.37	61215.5	1496	AAEL003313-PA	9	1.61871	11	1.97842	18.35	0	SignalP-noTM		15056.3	25430.8	8919.33	49406.4	983	1065	1841	533.949	578.49	-0.11559	2.99255	2.7623	5.4898	0.296318
AAEL008607	1466	tep3	Macroglobln_a2;A2M_N;Terpenoid_cyclase/PrenylTrfase;A-macroglobulin_rcpt-bd;A2M_N_2;A2M_comp;Ig-like_fold;MacrogloblnA2_thiol-ester-bond;MacrogloblnA2_CS	IPR001599;IPR002890;IPR008930;IPR009048;IPR011625;IPR011626;IPR013783;IPR019565;IPR019742	GO:0005615;GO:0005576;GO:0004866	5.44	163616	384.72	AAEL008607-PA	21	1.43247	29	1.97817	16.23	0.0197	SignalP-noTM		12423.7	9669.08	10423.9	32516.7	167	767	5286	31.5929	145.1	-2.19938	2.22272	2.16167	3.66126	0.296264
AAEL008784	254	serine-type enodpeptidase,	Trypsin_dom;Peptidase_S1A;Peptidase_S1_PA;TRYPSIN_HIS;TRYPSIN_SER	IPR001254;IPR001314;IPR009003;IPR018114;IPR033116	GO:0006508;GO:0004252	5.27	28098.7	1013.64	AAEL008784-PA	4	1.5748	5	1.9685	22.05	0	SignalP-noTM		16834.7	23571.7	10075.7	50482	156	922	855	182.456	1078.36	-2.56322	2.19312	3.03276	5.29392	0.294136
AAEL010338	254		DUF725	IPR007931		4.53	28678.5	646.967	AAEL010338-PA	4	1.5748	5	1.9685	17.32	0.0029	SignalP-noTM		7038.92	4183	0	11221.9	1245	341	2331	534.106	146.289	1.8683	3.09517	2.16521	4.89284	0.294136
AAEL005733	1635	myosin heavy chain, nonmuscle or smooth muscle	IQ_motif_EF-hand-BS;Myosin_head_motor_dom;Myosin_tail;P-loop_NTPase	IPR000048;IPR001609;IPR002928;IPR027417	GO:0005524;GO:0003774;GO:0016459;GO:0005515	5.42	187875	2887.33	AAEL005733-PA	28	1.71254	32	1.95719	18.9	0			11257	7980.17	25745.1	44982.2	23167	65805	6423	3606.88	10245.2	-1.50613	4.36487	4.01052	7.56765	0.291632
AAEL006586	307	serine protease	Trypsin_dom;Peptidase_S1A;Peptidase_S1_PA;TRYPSIN_HIS	IPR001254;IPR001314;IPR009003;IPR018114	GO:0006508;GO:0004252	4.36	33931	527.152	AAEL006586-PA	5	1.62866	6	1.9544	24.1	0.0053	SignalP-noTM		8713.33	3566.83	4053	16333.2	1	18	1701	0.587889	10.582	-4.16993	0	1.02457	0.793942	0.291013
AAEL003600	312					6.04	36116	409.696	AAEL003600-PA	4	1.28205	6	1.92308	13.46	0.0176	SignalP-noTM		5466.17	1693.25	6370.5	13529.9	1884	2318	1110	1697.3	2088.29	-0.299082	3.27508	3.31979	6.54955	0.283997
AAEL003889	418	Gram-Negative Binding Protein (GNBP) or Beta-1 3-Glucan Binding Protein (BGBP).	GH16;ConA-like_dom	IPR000757;IPR013320	GO:0005975;GO:0004553	5.55	46601.6	611.31	AAEL003889-PA	6	1.43541	8	1.91388	14.11	0.0053	SignalP-noTM		12164.5	7652	0	19816.5	58	80	1257	46.1416	63.6436	-0.463947	1.76343	1.80375	3.46785	0.281914
AAEL009842	157	Galectin [Source:UniProtKB/TrEMBL;Acc:Q16UP1]	Galectin_CRD;ConA-like_dom	IPR001079;IPR013320	GO:0030246	4.3	18315.2	572.479	AAEL009842-PA	3	1.91083	3	1.91083	27.39	0.0053			4932	1342	8426.75	14700.8	120	321	474	253.165	677.215	-1.41954	2.07918	2.83073	5.23413	0.281222
AAEL005056	210	electron transfer flavoprotein beta-subunit	ET-Flavoprotein_bsu_CS;ETF_b;Rossmann-like_a/b/a_fold;ETF_a/b_N;ETF_beta_N	IPR000049;IPR012255;IPR014729;IPR014730;IPR033948	GO:0009055	9.39	22920.7	614.476	AAEL005056-PA	3	1.42857	4	1.90476	12.38	0.0053			18811.7	6567.67	6642.5	32021.8	702	911	633	1109	1439.18	-0.37598	2.84634	3.15811	6.20305	0.279841
AAEL009651	158	nascent polypeptide associated complex alpha subunit (nac alpha)	Nas_poly-pep-assoc_cplx_dom;EGD2/NACA	IPR002715;IPR016641	GO:0005854	5.85	17240.7	872.853	AAEL009651-PA	2	1.26582	3	1.89873	10.76	0			8620.25	3323.5	11323.5	23267.2	760	1022	934	813.704	1094.22	-0.427324	2.88081	3.0391	5.94957	0.278464
AAEL017973	638	heat shock protein HSP70	Hsp_70_fam;Heat_shock_70_CS;HSP70_peptide-bd;HSP70_C	IPR013126;IPR018181;IPR029047;IPR029048	GO:0005524	5.69	70808.8	1252.24	AAEL017973-PA	10	1.5674	12	1.88088	23.67	0			19279.3	18166.1	8306.56	45752
AAEL003675	266	ubiquinol-cytochrome c reductase iron-sulfur subunit	Ubiquinol_cyt_Rdtase_TM;Rieske_Fe-S_prot_C;Ubiquinol_cyt_c_Rdtase_Fe-S-su;Rieske_Fe-S_prot;Rieske_2Fe-2S	IPR004192;IPR005805;IPR006317;IPR014349;IPR017941	GO:0016679;GO:0016020;GO:0016491;GO:0055114;GO:0051537;GO:0005743;GO:0008121;GO:0070469	8.11	25979.5	1670.65	AAEL003675-PB	3	1.12782	5	1.8797	20.42	0			3139.5	8233.25	16218.2	27590.9	3136	6521	1614	1943	4040.27	-1.05617	3.49638	3.60641	6.89488	0.274088
AAEL007526	537	electron transfer flavoprotein-ubiquinone oxidoreductase	FAD/NAD-binding_dom	IPR023753	GO:0016491;GO:0055114	5.98	58668.5	539.337	AAEL007526-PA	8	1.48976	10	1.8622	20.48	0.0053			1985.75	9335.67	6234.92	17556.3	398	355	2554	155.834	138.998	0.164949	2.59988	2.14301	4.33567	0.270026
AAEL007883	108	fk506-binding protein	PPIase_FKBP_dom;PPIase_FKBP	IPR001179;IPR023566	GO:0003755	8.66	11596.1	5371.11	AAEL007883-PA	2	1.85185	2	1.85185	24.07	0			10956	8442.25	4236.75	23635	3230	2138	1976	1634.62	1081.98	0.595272	3.5092	3.03422	6.24764	0.267606
AAEL013623	325	trypsin	Trypsin_dom;Peptidase_S1A;Peptidase_S1_PA;TRYPSIN_HIS;TRYPSIN_SER	IPR001254;IPR001314;IPR009003;IPR018114;IPR033116	GO:0006508;GO:0004252	6.36	35900.9	5095.89	AAEL013623-PA	4	1.23077	6	1.84615	32	0			29962.2	71404.2	35613.8	136980	143	378	1909	74.9083	198.009	-1.40237	2.15534	2.29669	4.17122	0.266268
AAEL011090	271	complement component	MAM33	IPR003428	GO:0005759	4.73	30622.5	885.073	AAEL011090-PA	3	1.10701	5	1.84502	11.07	0			10135.9	5996	7809	23940.9	709	251	1057	670.766	237.465	1.4981	2.85065	2.3756	5.20217	0.266001
AAEL013144	326	Eukaryotic translation initiation factor 3 subunit I (eIF3i)	WD40_repeat;WD40/YVTN_repeat-like_dom;WD40_repeat_dom;WD40_repeat_CS;G-protein_beta_WD-40_rep;eIF3i	IPR001680;IPR015943;IPR017986;IPR019775;IPR020472;IPR027525	GO:0005737;GO:0003743;GO:0005852;GO:0005515	5.47	36246.6	566.627	AAEL013144-PA	5	1.53374	6	1.84049	21.47	0.0053			14620	7762	6755	29137	1795	1786	1565	1146.96	1141.21	0.00725176	3.25406	3.05737	6.11692	0.264934
AAEL007033	272	Pyrroline-5-carboxylate reductase [Source:UniProtKB/TrEMBL;Acc:Q173T1]	Pyrroline-COOH_reductase;6-PGluconate_DH_C-like;NAD(P)-bd_dom;P5C_Rdtase_cat_N;P5CR_dimer	IPR000304;IPR008927;IPR016040;IPR028939;IPR029036	GO:0055114;GO:0004735;GO:0006561;GO:0055129	7.11	28800	1116.18	AAEL007033-PA	4	1.47059	5	1.83824	19.12	0			0	3832	9839.78	13671.8	57	139	1107	51.4905	125.565	-1.28605	1.75587	2.09887	3.8106	0.264401
AAEL001061	219	glutathione S-transferase (GSTD1)	Glutathione_S-Trfase_N;Glutathione-S-Trfase_C-like;Thioredoxin-like_fold;GST_C	IPR004045;IPR010987;IPR012336;IPR004046	GO:0005515	5.69	23964.4	610.804	AAEL001061-PB	3	1.36986	4	1.82648	11.48	0.0053			4528.17	4620	6978	16126.2	2471	1863	660	3743.94	2822.73	0.407467	3.39287	3.45067	7.024	0.261616
AAEL001865	165		NADH_UbQ_OxRdtase_su10	IPR019377		6.68	19656.1	212.44	AAEL001865-PA	2	1.21212	3	1.81818	20.61	0.0314			0	0	7656.25	7656.25	832	1558	690	1205.8	2257.97	-0.90504	2.92012	3.35372	6.43499	0.259637
AAEL008801	167		DUF753	IPR008472	GO:0016021	5.33	19455.3	3521.3	AAEL008801-PA	3	1.79641	3	1.79641	41.32	0		TMhelix	55081.2	165310	66922.5	287314	266	564	791	336.283	713.021	-1.08427	2.42488	2.8531	5.37981	0.254405
AAEL003530	112	acidic ribosomal protein P1, putative	T.cruzi_P2-like;Ribosomal_L12	IPR001859;IPR027534	GO:0003735;GO:0006412;GO:0005622;GO:0005840;GO:0006414	3.95	11536	4004.07	AAEL003530-PA	2	1.78571	2	1.78571	30.36	0			16787	12744	14216.5	43747.5	1188	899	1004	1183.27	895.418	0.402142	3.07482	2.95203	6.02511	0.251812
AAEL003664	393	lupus la ribonucleoprotein	RRM_dom;Lupus_La;La_HTH;WHTH_DNA-bd_dom;La_RRM	IPR000504;IPR002344;IPR006630;IPR011991;IPR014886	GO:0005634;GO:0003723;GO:0006396;GO:0003676;GO:0030529	5.65	45811.5	877.887	AAEL003664-PB	7	1.78117	7	1.78117	20.1	0			12533.5	3676.67	3120	19330.2	1429	626	1566	912.516	399.745	1.19077	3.15503	2.60178	5.56202	0.250705
AAEL002833	339	cathepsin l	Pept_cys_AS;Peptidase_C1A_C;Peptidase_C1A;Prot_inhib_I29;Pept_his_AS;Pept_asp_AS	IPR000169;IPR000668;IPR013128;IPR013201;IPR025660;IPR025661	GO:0006508;GO:0008234	5.68	38502.9	1340.95	AAEL002833-PA	5	1.47493	6	1.76991	25.37	0	SignalP-noTM		7350.33	5991.5	7167.58	20509.4	1321	3542	2296	575.348	1542.68	-1.42293	3.1209	3.18828	5.94821	0.247952
AAEL018664	228	cytochrome c oxidase subunit II [Source:European Nucleotide Archive;Acc:COX2]	Copper_CuA;CcO_II-like_C;Cupredoxin;Cyt_c_oxidase_su2_TM_dom;Cyt_c_oxidase_su2;CcO_II_C	IPR001505;IPR002429;IPR008972;IPR011759;IPR014222;IPR034210	GO:0016020;GO:0016021;GO:0016491;GO:0005507;GO:0004129;GO:0005743;GO:0022900;GO:0070469	5.28	26613.3	1051.05	AAEL018664-PA	3	1.31579	4	1.75439	16.23	0		TMhelix	0	0	23520.8	23520.8
AAEL013071	457	ribophorin	Ribophorin_I	IPR007676	GO:0016021;GO:0005783;GO:0006486;GO:0004579;GO:0005789	8.86	52355.3	309.701	AAEL013071-PA	8	1.75055	8	1.75055	24.51	0.026	SignalP-noTM	TMhelix	1439	5586.67	9647.94	16673.6	1879	945	1928	974.585	490.145	0.991579	3.27393	2.69032	5.67914	0.243174
AAEL004423	172	mitochondrial F0 ATP synthase D chain, putative	ATP_synth_F0_dsu_mt	IPR008689	GO:0015986;GO:0015078;GO:0000276	5.09	19614.1	3086.57	AAEL004423-PA	2	1.16279	3	1.74419	19.19	0			0	0	5632.08	5632.08	2289	4238	1041	2198.85	4071.09	-0.888666	3.35965	3.60971	6.95191	0.241593
AAEL002280	700	ctl2	Choline_transptr-like	IPR007603	GO:0016021	7.97	81261.1	1278.03	AAEL002280-PA	11	1.57143	12	1.71429	18.71	0		TMhelix	27047	20442.8	8541.89	56031.7	920	1399	2802	328.337	499.286	-0.60469	2.96379	2.69835	5.21467	0.234083
AAEL006483	176				GO:0016021	8.07	19878.1	1432.35	AAEL006483-PA	2	1.13636	3	1.70455	6.82	0		TMhelix	9217	21487	4499	35203	278	4534	956	290.795	4742.68	-4.02763	2.44404	3.67602	6.13961	0.231609
AAEL008093	294	trypsin	Trypsin_dom;Peptidase_S1A;Peptidase_S1_PA;TRYPSIN_HIS;TRYPSIN_SER	IPR001254;IPR001314;IPR009003;IPR018114;IPR033116	GO:0006508;GO:0004252	5.97	31929.3	5115.87	AAEL008093-PA	3	1.02041	5	1.70068	18.03	0	SignalP-noTM		8999.08	35874.9	26934.8	71808.8	263	618	1344	195.685	459.821	-1.23254	2.41996	2.66259	4.95415	0.230623
AAEL011184	354	mitochondrial phosphate carrier protein	Mitochondrial_sb/sol_carrier;Mt_carrier_dom	IPR018108;IPR023395	GO:0016021;GO:0006810	8.74	39075.5	1266.75	AAEL011184-PA	5	1.41243	6	1.69492	15.54	0			991	5903	18287	25181	4138	14959	1566	2642.4	9552.36	-1.85401	3.61679	3.98011	7.40211	0.229148
AAEL003123	360	deoxyribonuclease I, putative	DNA/RNA_non-sp_Endonuclease	IPR001604	GO:0016787;GO:0046872;GO:0003676	5.09	40589.2	505.483	AAEL003123-PA	5	1.38889	6	1.66667	20.83	0.0074			11294.5	8593.67	4102.83	23991	554	622	1321	419.379	470.855	-0.167029	2.74351	2.67289	5.29549	0.221849
AAEL007760	182	mct-1 protein	PUA;Uncharacterised_CHP00451;PUA-like_domain;MCT-1/Tma20	IPR002478;IPR004521;IPR015947;IPR016437	GO:0003723;GO:0005737	9.19	20755.1	1528.86	AAEL007760-PA	3	1.64835	3	1.64835	24.73	0			28852.2	15565.8	15355.8	59773.8	152	134	874	173.913	153.318	0.181838	2.18184	2.18559	4.42593	0.21705
AAEL013574	243	apolipoprotein D, putative	Lipocln_cytosolic_FA-bd_dom;ApolipopD;Calycin;Lipocalin_CS	IPR000566;IPR002969;IPR012674;IPR022272	GO:0005215;GO:0006810;GO:0008289	8.25	27262	1978.55	AAEL013574-PA	4	1.64609	4	1.64609	25.51	0	SignalP-noTM		4426.5	8583.58	3528.17	16538.2	353	490	1474	239.484	332.429	-0.473114	2.54777	2.5217	4.90098	0.216454
AAEL003606	427	purine biosynthesis protein 6, pur6	PurE_dom;SAICAR_synthetase_CS;SAICAR_synt/ADE2_N;PurE_classII	IPR000031;IPR018236;IPR028923;IPR033626	GO:0006189;GO:0006164;GO:0004639	8	47609.5	367.682	AAEL003606-PA	5	1.17096	7	1.63934	13.58	0.0197			0	0	7291.33	7291.33	6388	827	2011	3176.53	411.238	2.94941	3.80536	2.61409	6.11605	0.21467
AAEL002781	306	galactokinase	Galactokinase;GHMP_knse_ATP-bd_CS;GHMP_kinase_N_dom;Mevalonate/galactokinase;GHMP_kinase_C_dom;Ribosomal_S5_D2-typ_fold_subgr;GalKase_gal-bd;Galactokinase_CS;Ribosomal_S5_D2-typ_fold	IPR000705;IPR006203;IPR006204;IPR006206;IPR013750;IPR014721;IPR019539;IPR019741;IPR020568	GO:0005534;GO:0005524;GO:0016301;GO:0005737;GO:0008152;GO:0016773;GO:0004335;GO:0006012;GO:0046835	7.11	44350.6	1040.53	AAEL002781-PB	5	1.63399	5	1.63399	18.09	0			1951.5	1544	7882.72	11378.2	143	295	1133	126.214	260.371	-1.0447	2.15534	2.41559	4.5167	0.213249
AAEL009601	306	pyridoxine kinase	PyrdxlKinase;PM/HMP-P_kinase-1;Ribokinase-like	IPR004625;IPR013749;IPR029056	GO:0008478;GO:0009443	6.55	34058.1	469.677	AAEL009601-PA	4	1.30719	5	1.63399	17.32	0.0115			14441.8	8685.67	6855	29982.5	725	603	1554	466.538	388.031	0.265823	2.86034	2.58887	5.25775	0.213249
AAEL001701	245	serine-type enodpeptidase	Trypsin_dom;Peptidase_S1A;Peptidase_S1_PA;TRYPSIN_HIS	IPR001254;IPR001314;IPR009003;IPR018114	GO:0006508;GO:0004252	4.71	26901.2	1625.38	AAEL001701-PA	4	1.63265	4	1.63265	15.51	0	SignalP-noTM		12717.5	5369.67	0	18087.2	177	10	738	239.837	13.5501	4.14568	2.24797	1.13194	3.51186	0.212894
AAEL015260	124	phosphatidylethanolamine-binding protein, putative	PEBP	IPR008914		9.07	14172.7	1370.18	AAEL015260-PA	2	1.6129	2	1.6129	23.39	0			10231.2	3301.25	0	13532.5	93	26	776	119.845	33.5052	1.83872	1.96848	1.52511	3.60373	0.207608
AAEL002848	435	Tubulin beta chain (Fragment) [Source:UniProtKB/TrEMBL;Acc:Q17GX8]	Tubulin;Beta_tubulin;Tubulin_FtsZ_GTPase;Tub_FtsZ_C;Tubulin_CS;Tubulin/FtsZ_2-layer-sand-dom	IPR000217;IPR002453;IPR003008;IPR008280;IPR017975;IPR018316	GO:0007017;GO:0005874;GO:0003924;GO:0005525;GO:0005200	4.6	49350.4	2888.16	AAEL002848-PA	5	1.14943	7	1.6092	26.44	0			1691	4483.17	8330.5	14504.7	491	165	2246	218.611	73.4639	1.57326	2.69108	1.86607	4.20575	0.206609
AAEL003974	311		Peptidase_C2_calpain_cat;Calpain_cysteine_protease	IPR001300;IPR022684	GO:0005622;GO:0006508;GO:0004198	6.34	35906.6	228.698	AAEL003974-PA	2	0.643087	5	1.60772	9.32	0.0314			38151	29409.3	25369.7	92930	52	49	936	55.5556	52.3504	0.0857299	1.716	1.71892	3.46365	0.20621
AAEL001928	376	Actin-1 [Source:UniProtKB/Swiss-Prot;Acc:P49128]	Actin;Actin_CS;Actin/actin-like_CS	IPR004000;IPR004001;IPR020902	GO:0005524;GO:0005856;GO:0005737	5.15	42072	13891.5	AAEL001928-PA	3	0.797872	6	1.59574	5.05	0			1724	0	6446.81	8170.81	815	3134	1690	482.249	1854.44	-1.94313	2.91116	3.26821	5.95148	0.202963
AAEL009330	315	carbonic anhydrase II, putative	Carbonic_anhydrase_a;Carbonic_anhydrase_a-class_CS;Carbonic_anhydrase_a-class	IPR001148;IPR018338;IPR023561	GO:0008270;GO:0004089;GO:0006730	5.77	35364	601.398	AAEL009330-PA	5	1.5873	5	1.5873	15.24	0.0053	SignalP-noTM	TMhelix	2752.42	7989.67	7024.5	17766.6	159	1959	1103	144.152	1776.07	-3.62302	2.2014	3.24946	5.40828	0.200659
AAEL007699	190	60S ribosomal protein L9	Ribosomal_L6;Ribosomal_L6_CS2;Ribosomal_L6_a/b-dom	IPR000702;IPR002359;IPR020040	GO:0003735;GO:0006412;GO:0005622;GO:0005840;GO:0019843	10.35	21551.1	380.974	AAEL007699-PA	3	1.57895	3	1.57895	17.89	0.0197			10572	11672.5	13454.3	35698.8	13850	20091	686	20189.5	29287.2	-0.536663	4.14145	4.46668	8.7718	0.198368
AAEL017451	635		Peptidase_M2	IPR001548	GO:0016020;GO:0006508;GO:0046872;GO:0008237;GO:0008241;GO:0004180	6.32	74265.4	399.262	AAEL017451-PA	10	1.5748	10	1.5748	20.47	0.0197	SignalP-noTM		22369.2	25936	23298.2	71603.4	2544	1124	2765	920.072	406.51	1.17846	3.40552	2.60907	5.57289	0.197226
AAEL015572	508	ribophorin ii	Swp1	IPR008814	GO:0016021;GO:0008250;GO:0006487	9.09	55114.9	587.458	AAEL015572-PA	7	1.37795	8	1.5748	20.28	0.0053	SignalP-noTM		1715.5	6325.5	6362.83	14403.8	172	74	1640	104.878	45.122	1.21681	2.23553	1.65439	3.67507	0.197226
AAEL009496	192	40S ribosomal protein S7	Ribosomal_S7e	IPR000554	GO:0003735;GO:0006412;GO:0005622;GO:0005840	10.34	22105.8	349.776	AAEL009496-PA	3	1.5625	3	1.5625	14.06	0.0225			4120.25	1573	8301.06	13994.3	9964	14312	984	10126	14544.7	-0.522428	3.99843	4.16271	8.16814	0.19382
AAEL004118	320	aldo-keto reductase	Aldo/ket_reductase_CS;Aldo/keto_reductase;NADP_OxRdtase_dom	IPR018170;IPR020471;IPR023210	GO:0016491;GO:0055114	6.63	36580.7	635.473	AAEL004118-PA	5	1.5625	5	1.5625	20.31	0.0053			2236.5	1373	10176.7	13786.2	126	280	1061	118.756	263.902	-1.152	2.10037	2.42144	4.4961	0.19382
AAEL013613	387	Pyruvate dehydrogenase E1 component subunit alpha [Source:UniProtKB/TrEMBL;Acc:Q16IL3]	DH_E1;Pyrv_DH_E1_asu_subgrp-y;THDP-binding	IPR001017;IPR017597;IPR029061	GO:0008152;GO:0004739;GO:0006086;GO:0043231;GO:0016624	6.69	42834.3	489.33	AAEL013613-PA	5	1.29199	6	1.55039	23	0.0074			0	0	8081.67	8081.67	728	2152	1337	544.503	1609.57	-1.56367	2.86213	3.20671	5.94271	0.19044
AAEL002606	131	odorant binding protein OBP35	PBP_GOBP	IPR006170	GO:0005549	8.52	14445.6	579.698	AAEL002606-PA	2	1.52672	2	1.52672	15.27	0.0053	SignalP-noTM	TMhelix	4510	1601	0	6111	290	493	875	331.429	563.429	-0.765535	2.4624	2.75084	5.27123	0.183759
AAEL007915	593	Moesin/ezrin/radixin homolog 1	FERM_domain;Ez/rad/moesin-like;Moesin_tail;ERM;ERM_C_dom;PH_dom-like;FERM/acyl-CoA-bd_prot_3-hlx;FERM_N;FERM_PH-like_C;FERM_CS;FERM_central;Band_41_domain;Ubiquitin-rel_dom	IPR000299;IPR000798;IPR008954;IPR011174;IPR011259;IPR011993;IPR014352;IPR018979;IPR018980;IPR019747;IPR019748;IPR019749;IPR029071	GO:0005856;GO:0005737;GO:0008092;GO:0019898;GO:0005886;GO:0003779;GO:0005912;GO:0045197	5.81	70275.7	360.708	AAEL007915-PA	9	1.51771	9	1.51771	20.24	0.0197			10244.7	7015.5	10082.2	27342.4	2330	2531	6110	381.342	414.239	-0.119378	3.36736	2.61725	5.19857	0.181188
AAEL004297	1127	ATP-citrate synthase [Source:UniProtKB/TrEMBL;Acc:Q17D87]	Citrate_synthase;CoA-bd;CoA_ligase;ATP-grasp_succ-CoA_synth-type;ATP-citrate_synthase;NAD(P)-bd_dom;Succinyl-CoA_synth-like;Citrate_synth-like_lrg_a-sub;Citrate_synth-like_sm_a-sub;Cit_synth/succinyl-CoA_lig_AS;Succ-CoA_synthase_bsu_CS;Citrate-bd;Citrt_syn/SCS-alpha_CS	IPR002020;IPR003781;IPR005811;IPR013650;IPR014608;IPR016040;IPR016102;IPR016142;IPR016143;IPR017440;IPR017866;IPR032263;IPR033847	GO:0005524;GO:0003824;GO:0046872;GO:0005737;GO:0008152;GO:0006629;GO:0048037;GO:0006101;GO:0046912;GO:0003878;GO:0006085	6.78	123960	451.189	AAEL004297-PA	14	1.24224	17	1.50843	15.79	0.0158			6055.17	7001	9519.22	22575.4	3381	4354	4480	754.687	971.875	-0.364891	3.52905	2.98761	5.86538	0.178525
AAEL002178	533		FTHF_cligase	IPR002698	GO:0016874	9.66	60609.3	748.635	AAEL002178-PA	7	1.31332	8	1.50094	16.14	0.0029			2905	0	5351.78	8256.78	145	174	6206	23.3645	28.0374	-0.263034	2.16137	1.44774	2.8163	0.176363
AAEL001887	400	glutamine synthetase 1, 2 (glutamate-amonia ligase) (gs)	Gln_synth_cat_dom;Gln_synt_b-grasp;Gln_synth/guanido_kin_cat_dom;Gln_synth_N_conserv_site;Gln_synth_gly_rich_site	IPR008146;IPR008147;IPR014746;IPR027302;IPR027303	GO:0005524;GO:0003824;GO:0006807;GO:0004356;GO:0006542	6.67	45128.7	868.237	AAEL001887-PA	5	1.25	6	1.5	16.75	0			22282.7	6692.17	4660.5	33635.3	11720	1016	2871	4082.2	353.884	3.528	4.06893	2.54886	6.15976	0.176091
AAEL003396	134	60S ribosomal protein L32 [Source:UniProtKB/TrEMBL;Acc:Q1HR34]	Ribosomal_L32e;Ribosomal_L32e_CS	IPR001515;IPR018263	GO:0003735;GO:0006412;GO:0005622;GO:0005840	11.35	15941.8	498.546	AAEL003396-PA	2	1.49254	2	1.49254	17.91	0.0074			6318	3409.5	9456.67	19184.2	11532	12787	624	18480.8	20492	-0.149035	4.0619	4.31158	8.5783	0.173925
AAEL010146	770	3-hydroxyacyl-coa dehyrogenase	Crotonase_core_superfam;3HC_DH_C;3-OHacyl-CoA_DH_NAD-bd;6-PGluconate_DH_C-like;Fa_ox_alpha_mit;6PGD_dom_2;NAD(P)-bd_dom;Enoyl-CoA_hyd/isom_CS;ClpP/crotonase-like_dom	IPR001753;IPR006108;IPR006176;IPR008927;IPR012803;IPR013328;IPR016040;IPR018376;IPR029045	GO:0016491;GO:0055114;GO:0003824;GO:0005739;GO:0008152;GO:0006635;GO:0003857;GO:0006631;GO:0004300;GO:0016507	9.66	82923.1	883.889	AAEL010146-PA	12	1.55844	11	1.42857	16.1	0			5490.5	19266.3	18760.7	43517.5	629	385	2413	260.671	159.552	0.708202	2.79865	2.2029	4.619	0.154902
AAEL002572	210	myosin regulatory light chain 2 (mlc-2)	EF_hand_dom;EF-hand-dom_pair;EF_Hand_1_Ca_BS	IPR002048;IPR011992;IPR018247	GO:0005509	4.41	22833.4	536.038	AAEL002572-PA	2	0.952381	3	1.42857	13.81	0.0053			14421	6957.5	9225.89	30604.4	4671	13809	1398	3341.2	9877.68	-1.56381	3.66941	3.99466	7.51856	0.154902
AAEL012994	561	Glucose-6-phosphate isomerase [Source:UniProtKB/TrEMBL;Acc:Q16KI0]	G6P_Isomerase;Phosphoglucose_isomerase_CS;G6P_Isomerase_C	IPR001672;IPR018189;IPR023096	GO:0006096;GO:0004347;GO:0006094	5.95	63316	373.75	AAEL012994-PA	7	1.24777	8	1.42602	15.69	0.0197			7766	13042.3	39728	60536.3	321	572	1946	164.954	293.936	-0.833442	2.50651	2.46825	4.68562	0.154127
AAEL004798	351		Chitin-bd_dom	IPR002557	GO:0016021;GO:0005576;GO:0008061;GO:0006030	5.92	39634.4	2825.84	AAEL004798-PA	4	1.1396	5	1.4245	15.67	0		TMhelix	7704.33	7688.17	11419.4	26811.9	2475	1779	1159	2135.46	1534.94	0.476362	3.39358	3.18609	6.51558	0.153663
AAEL003995	353	zinc binding dehydrogenase	GroES-like;ADH_C;ADH_N;NAD(P)-bd_dom;PKS_ER	IPR011032;IPR013149;IPR013154;IPR016040;IPR020843	GO:0016491;GO:0055114	9.23	38874.9	426.946	AAEL003995-PA	3	0.849858	5	1.41643	15.01	0.0158			14111.7	9158.67	3196	26466.3	17	10	1209	14.0612	8.2713	0.765535	1.23045	0.917574	2.0656	0.151195
AAEL009287	214	ran	Small_GTPase;Ran_GTPase;Small_GTP-bd_dom;P-loop_NTPase	IPR001806;IPR002041;IPR005225;IPR027417	GO:0005634;GO:0007165;GO:0006886;GO:0003924;GO:0005525;GO:0006913	7.84	24697.3	478.183	AAEL009287-PA	2	0.934579	3	1.40187	9.81	0.0093			5557.58	3142	2979.22	11678.8	3871	2657	1833	2111.84	1449.54	0.542908	3.58782	3.16123	6.48589	0.146707
AAEL012686	143	40S ribosomal protein S23 [Source:UniProtKB/TrEMBL;Acc:Q1HRM5]	Ribosomal_S23_euk/arc;Ribosomal_S12/S23;NA-bd_OB-fold	IPR005680;IPR006032;IPR012340	GO:0003735;GO:0006412;GO:0005622;GO:0005840;GO:0015935	11.03	16232.9	994.813	AAEL012686-PA	2	1.3986	2	1.3986	21.68	0			5192.5	2555.5	8633.33	16381.3	16542	20817	862	19190.3	24149.7	-0.331628	4.21859	4.38291	8.66599	0.145694
AAEL017982	578	heat shock protein HSP70	Hsp_70_fam;Heat_shock_70_CS;HSP70_peptide-bd;HSP70_C	IPR013126;IPR018181;IPR029047;IPR029048	GO:0005524	5.51	64416.7	1025.88	AAEL017982-PA	6	1.03806	8	1.38408	13.15	0			13790.2	8016.17	6445.17	28251.5
AAEL008167	435	aspartate ammonia lyase	Fumarate_lyase_fam;Fum_hydII;L-Aspartase-like;Fumarase_C_C;Fumarate_lyase_CS;Fumarate_lyase_N;Fumarase/histidase_N	IPR000362;IPR005677;IPR008948;IPR018951;IPR020557;IPR022761;IPR024083	GO:0003824;GO:0016829;GO:0006099;GO:0004333;GO:0006106;GO:0045239	8.44	54819	418.635	AAEL008167-PB	4	0.91954	6	1.37931	14.12	0.0158			7133.83	7641	10851.4	25626.2	1528	2038	2172	703.499	938.306	-0.41551	3.18412	2.97234	5.81961	0.139662
AAEL000541	369	fasciclin, putative	Ig-like_dom;CD80_C2-set;Ig-like_fold	IPR007110;IPR013162;IPR013783	GO:0016021	5.78	40966.6	2051.93	AAEL000541-PA	4	1.08401	5	1.35501	10.84	0		TMhelix	8849.67	27058.9	8473.56	44382.1	504	652	1525	330.492	427.541	-0.371448	2.70243	2.63098	5.15014	0.131944
AAEL012312	443	proliferation-associated 2g4 (pa2g4/ebp1)	Pept_M24;PA2G4;WHTH_DNA-bd_dom	IPR000994;IPR004545;IPR011991		8.45	48500.2	465.168	AAEL012312-PA	7	1.58014	6	1.3544	18.28	0.0115			3772.17	9664.75	11584.4	25021.4	3557	1754	2482	1433.12	706.688	1.02001	3.55108	2.84923	6.00551	0.131748
AAEL010582	222	glutathione transferase	Glutathione_S-Trfase_N;GST_C;Glutathione-S-Trfase_C-like;Thioredoxin-like_fold	IPR004045;IPR004046;IPR010987;IPR012336	GO:0016740;GO:0005515	5.59	26067.1	726.577	AAEL010582-PA	3	1.35135	3	1.35135	18.92	0.0029			6121.5	7968.25	9800.17	23889.9	290	62	669	433.483	92.6756	2.22571	2.4624	1.96697	4.60394	0.130768
AAEL007064	371	Gram-Negative Binding Protein (GNBP) or Beta-1 3-Glucan Binding Protein (BGBP).	GH16;ConA-like_dom	IPR000757;IPR013320	GO:0005975;GO:0004553	9.65	42342.6	191.174	AAEL007064-PA	4	1.07817	5	1.34771	14.82	0.0314	SignalP-noTM	TMhelix	6662.17	8505.33	8686.44	23853.9	522	754	1116	467.742	675.627	-0.530515	2.71767	2.82971	5.49971	0.129596
AAEL015136	149	Niemann-Pick Type C-2, putative	ML_dom;Ig_E-set;ML_Npc2-like	IPR003172;IPR014756;IPR033916	GO:0005622;GO:0032367	4.25	16598	833.736	AAEL015136-PA	2	1.34228	2	1.34228	25.5	0	SignalP-noTM		6895.75	3264.5	0	10160.2	4733	183	618	7658.58	296.117	4.69284	3.67514	2.47146	6.35561	0.127844
AAEL008609	447	zinc carboxypeptidase	Peptidase_M14;M14A_act_pep;Peptidase/Inhibitor_I9;IGCP-like_CPD	IPR000834;IPR003146;IPR009020;IPR034223	GO:0008270;GO:0006508;GO:0004181;GO:0004180	4.87	51585.3	300.588	AAEL008609-PA	5	1.11857	6	1.34228	14.09	0.026			15847.8	12872.5	6255.78	34976.1	67	229	1563	42.8663	146.513	-1.77311	1.82607	2.16588	3.79799	0.127844
AAEL012035	226	vacuolar ATP synthase subunit e	ATPase_V1/A1-cplx_esu	IPR002842	GO:0015991;GO:0046961;GO:0033178	5.8	25743.5	1266.02	AAEL012035-PA	2	0.884956	3	1.32743	14.16	0			0	0	5742	5742	3306	2927	3027	1092.17	966.964	0.175664	3.5193	2.98541	6.0237	0.123013
AAEL006362	681	mitochondrial solute carrier	EF_hand_dom;Mit_carrier;EF-hand-dom_pair;Mitochondrial_sb/sol_carrier;EF_Hand_1_Ca_BS;Mt_carrier_dom	IPR002048;IPR002067;IPR011992;IPR018108;IPR018247;IPR023395	GO:0016021;GO:0005509;GO:0055085	7.78	75736.9	369.489	AAEL006362-PA	9	1.32159	9	1.32159	16.74	0.0197			6759	7556	6237.89	20552.9	1137	740	3185	356.986	232.339	0.619635	3.05576	2.36612	4.91877	0.121095
AAEL009747	152	40S ribosomal protein S18	Ribosomal_S13;Ribosomal_S13-like_H2TH;Ribosomal_S13_CS;30s_Rbsml_prot_S13_C	IPR001892;IPR010979;IPR018269;IPR027437	GO:0003735;GO:0006412;GO:0005622;GO:0005840;GO:0003723;GO:0003676	10.88	17584.4	1171.24	AAEL009747-PA	2	1.31579	2	1.31579	11.18	0			15626.8	11329	11330.2	38285.9	12637	17120	1125	11232.9	15217.8	-0.438029	4.10164	4.18235	8.23284	0.119186
AAEL006377	307	leucine-rich immune protein (Coil-less)	Leu-rich_rpt;Leu-rich_rpt_typical-subtyp;L_dom-like	IPR001611;IPR003591;IPR032675	GO:0005515	4.62	35603.2	259.021	AAEL006377-PA	3	0.977199	4	1.30293	11.07	0.0308	SignalP-noTM		8368.42	3323.75	8857.5	20549.7	47	138	996	47.1888	138.554	-1.55394	1.6721	2.14162	3.81546	0.114922
AAEL005401	307		Split_barrel_FMN-bd	IPR012349	GO:0016491;GO:0010181;GO:0048037;GO:0016021	5.22	22472.5	391.845	AAEL005401-PC	3	0.977199	4	1.30293	24.12	0.0197		TMhelix	4922.83	4988.83	10630	20541.6	3714	2087	1645	2257.75	1268.69	0.831543	3.56984	3.10336	6.45703	0.114922
AAEL000533	154	C-Type Lectin (CTL16)	C-type_lectin-like;C-type_lectin-like/link;CTDL_fold	IPR001304;IPR016186;IPR016187	GO:0030246	5.41	18067.3	409.458	AAEL000533-PA	2	1.2987	2	1.2987	12.34	0.0176	SignalP-noTM		4700	1459.5	0	6159.5	475	1328	465	1021.51	2855.91	-1.48326	2.67669	3.45575	6.46499	0.113509
AAEL013528	232	thioredoxin peroxidase	AhpC/TSA;Thioredoxin-like_fold;Thioredoxin_domain;Peroxiredoxin_C;Peroxiredoxin_AhpC-typ	IPR000866;IPR012336;IPR013766;IPR019479;IPR024706	GO:0016491;GO:0055114;GO:0045454;GO:0051920;GO:0016209;GO:0005623	8.8	26051.9	460.276	AAEL013528-PA	3	1.2931	3	1.2931	20.69	0.0115			7367.75	2940.5	6460.19	16768.4	350	369	699	500.715	527.897	-0.0762659	2.54407	2.72255	5.42214	0.111633
AAEL010756	156	40S ribosomal protein S19 [Source:UniProtKB/TrEMBL;Acc:Q1HRR8]	Ribosomal_S19e;WHTH_DNA-bd_dom	IPR001266;IPR011991	GO:0003735;GO:0006412;GO:0005840	10.35	17499.3	1982.52	AAEL010756-PA	2	1.28205	2	1.28205	14.1	0			19507.5	18260	26680.8	64448.2	12102	14150	652	18561.3	21702.5	-0.225557	4.08286	4.33651	8.60512	0.107905
AAEL012944	156	60S ribosomal protein L11	Ribosomal_L5;Ribosomal_L5_CS;Ribosomal_L5_domain;Ribosomal_L5_C;Ribosomal_L5_N	IPR002132;IPR020929;IPR022803;IPR031309;IPR031310	GO:0003735;GO:0006412;GO:0005622;GO:0005840	9.9	18167.9	1060.52	AAEL012944-PA	2	1.28205	2	1.28205	14.74	0			7947.75	2877.25	13404	24229	9640	12938	610	15803.3	21209.8	-0.42451	3.98408	4.32654	8.52528	0.107905
AAEL002457	392		Peptidase_C45	IPR005079		6.29	43702.6	617.971	AAEL002457-PB	3	0.765306	5	1.27551	12.44	0.0053			0	1963.5	5007.58	6971.08	179	1545	1454	123.109	1062.59	-3.10958	2.25285	3.02636	5.11665	0.105684
AAEL009691	1180	carboxylase:pyruvate/acetyl-coa/propionyl-coa	Biotin_lipoyl;PYR_CT;Biotin_BS;Carboxylase_cons_dom;CbamoylP_synth_lsu-like_ATP-bd;BC-like_N;Biotin_COase_C;Pyruv_COase;Single_hybrid_motif;Rudment_hybrid_motif;ATP-grasp;Biotin_carboxylation_dom;Aldolase_TIM;ATP_grasp_subdomain_1;PreATP-grasp_dom	IPR000089;IPR000891;IPR001882;IPR003379;IPR005479;IPR005481;IPR005482;IPR005930;IPR011053;IPR011054;IPR011761;IPR011764;IPR013785;IPR013815;IPR016185	GO:0005524;GO:0003824;GO:0046872;GO:0006094;GO:0004736;GO:0009374;GO:0006090;GO:0004075	6.42	131375	377.636	AAEL009691-PA	10	0.847458	15	1.27119	11.95	0.0197			10367.5	7267.83	7860.11	25495.4	2664	2118	4759	559.781	445.051	0.330891	3.42553	2.64841	5.39643	0.104209
AAEL010912	804	dipeptidyl-peptidase	Peptidase_S9;Peptidase_S9B_N;AB_hydrolase	IPR001375;IPR002469;IPR029058	GO:0016021;GO:0006508;GO:0008236	5.88	90311.2	690.339	AAEL010912-PA	9	1.1194	10	1.24378	15.42	0.0029		TMhelix	9177.67	14064.3	3627.5	26869.5	2252	998	3054	737.394	326.785	1.1741	3.35257	2.51426	5.38196	0.094744
AAEL013904	324	3-hydroxyisobutyrate dehydrogenase [Source:UniProtKB/TrEMBL;Acc:Q16HU0]	3-OH-isobutyrate_DH-rel_CS;6PGDH_NADP-bd;6-PGluconate_DH_C-like;HIBADH;6PGD_dom_2;HIBADH-related;NAD(P)-bd_dom;NADP-bd	IPR002204;IPR006115;IPR008927;IPR011548;IPR013328;IPR015815;IPR016040;IPR029154	GO:0016491;GO:0055114;GO:0051287;GO:0004616;GO:0008442;GO:0006574	8.64	34148.2	283.375	AAEL013904-PA	3	0.925926	4	1.23457	11.73	0.0308			1353	2809	6007.03	10169	308	139	1398	220.315	99.4278	1.14785	2.48855	1.99751	4.34055	0.091515
AAEL011746	332	succinyl-CoA ligase beta subunit	Succ_CoA_synthase_bsu;CoA_ligase;ATP-grasp;ATP-grasp_succ-CoA_synth-type;ATP_grasp_subdomain_1;Succinyl-CoA_synth-like;Succ-CoA_synthase_bsu_CS;Succ_CoA_betaA_euk	IPR005809;IPR005811;IPR011761;IPR013650;IPR013815;IPR016102;IPR017866;IPR034723	GO:0005524;GO:0003824;GO:0046872;GO:0005739;GO:0008152;GO:0000287;GO:0006099;GO:0004775	7.96	48672.4	329.552	AAEL011746-PB	3	0.903614	4	1.20482	8.74	0.026			6663.92	2842	11098.6	20604.5	1703	4316	2897	587.849	1489.82	-1.34162	3.23121	3.17313	5.9424	0.0809219
AAEL003125	424	acyl-coa dehydrogenase	Acyl-CoA_DH_CS;Acyl-CoA_Oxase/DH_cen-dom;AcylCo_DH/oxidase_C;AcylCoA_DH/oxidase_NM_dom;AcylCoA_DH/ox_N;IVD	IPR006089;IPR006091;IPR009075;IPR009100;IPR013786;IPR034183	GO:0055114;GO:0050660;GO:0008152;GO:0016627;GO:0003995	8.31	46934.4	453.208	AAEL003125-PA	4	0.943396	5	1.17925	9.43	0.0158			2171	1595	8566.22	12332.2	1733	392	2082	832.373	188.28	2.14435	3.2388	2.27481	5.19512	0.0716041
AAEL008072	255	NADH-plastoquinone oxidoreductase	NADH_UbQ_OxRdtase-like_20kDa;NADH_UQ_OxRdtase_20Kd_su	IPR006137;IPR006138	GO:0055114;GO:0008137;GO:0046872;GO:0051539;GO:0051536;GO:0048038	9.91	29312.4	825.064	AAEL008072-PA	3	1.17647	3	1.17647	13.33	0			0	0	7086.75	7086.75	886	1676	931	951.665	1800.21	-0.919644	2.94743	3.25532	6.23381	0.0705811
AAEL012576	519	Pyruvate kinase [Source:UniProtKB/TrEMBL;Acc:Q16LP5]	Pyr_Knase;Pyrv_Knase-like_insert_dom;Pyrv_Knase_brl;Pyrv_Knase_C;Pyrv/PenolPyrv_Kinase-like_dom;Pyrv_Knase_AS	IPR001697;IPR011037;IPR015793;IPR015795;IPR015813;IPR018209	GO:0006096;GO:0003824;GO:0016301;GO:0000287;GO:0004743;GO:0030955	7.48	56788.3	2188.73	AAEL012576-PA	4	0.770713	6	1.15607	7.13	0			6441.33	2476	1483	10400.3	380	1107	2336	162.671	473.887	-1.54258	2.57978	2.67567	4.88699	0.0629839
AAEL000944	693		TMEM214	IPR019308		9.49	78093.8	1046.3	AAEL000944-PA	8	1.1544	8	1.1544	14.29	0			19253.8	21957.7	29963.7	71175.1	1140	550	4137	275.562	132.947	1.05153	3.0569	2.12368	4.5639	0.0623568
AAEL010195	260	trypsin	Trypsin_dom;Peptidase_S1A;Peptidase_S1_PA;TRYPSIN_HIS;TRYPSIN_SER	IPR001254;IPR001314;IPR009003;IPR018114;IPR033116	GO:0006508;GO:0004252	5.96	28206.4	2052	AAEL010195-PA	3	1.15385	3	1.15385	17.69	0	SignalP-noTM		14117	7748.17	4739.33	26604.5	0	0	783	0	0					0.0621479
AAEL002334	435	eukaryotic translation initiation factor 3 subunit E (eIF3e)	PCI_dom;WHTH_DNA-bd_dom;eIF3e;eIF3e_N	IPR000717;IPR011991;IPR016650;IPR019010	GO:0005737;GO:0003743;GO:0005852;GO:0005515	6.15	51601.8	240.517	AAEL002334-PA	4	0.91954	5	1.14943	10.57	0.0308			2692.5	1526	5378.06	9596.56	2153	2523	1933	1113.81	1305.23	-0.228792	3.33304	3.11569	6.1625	0.0604807
AAEL004195	264	membrane associated progesterone receptor	Cyt_B5-like_heme/steroid-bd	IPR001199	GO:0016021	4.32	28402.4	392.231	AAEL004195-PA	3	1.13636	3	1.13636	15.53	0.0197		TMhelix	1370	11188.6	3145	15703.6	1483	1476	2612	567.764	565.084	0.00682588	3.17114	2.75211	5.50628	0.0555173
AAEL005740	617	AMP dependent ligase	AMP-dep_Synth/Lig	IPR000873	GO:0003824;GO:0008152	6.47	69725	358.953	AAEL005740-PA	6	0.972447	7	1.13452	11.51	0.0197			1436.5	5769	7746.5	14952	1064	1895	2183	487.403	868.071	-0.8327	3.02694	2.93856	5.62644	0.0548129
AAEL010776	446	carboxypeptidase	Peptidase_M14;M14A_act_pep;Peptidase/Inhibitor_I9;IGCP-like_CPD	IPR000834;IPR003146;IPR009020;IPR034223	GO:0008270;GO:0006508;GO:0004181;GO:0004180	5.85	50726.8	1260.72	AAEL010776-PA	4	0.896861	5	1.12108	14.35	0		TMhelix	25981.2	10112	2612.5	38705.7	1136	513	1450	783.448	353.793	1.14693	3.05538	2.54875	5.44276	0.0496351
AAEL003060	268	female-specific chymotrypsin	Trypsin_dom;Peptidase_S1A;Peptidase_S1_PA;TRYPSIN_HIS	IPR001254;IPR001314;IPR009003;IPR018114	GO:0006508;GO:0004252	4.65	29288.8	3501.82	AAEL003060-PA	3	1.1194	3	1.1194	17.91	0	SignalP-noTM		20557.5	11011.7	5695.58	37264.7	14937	18615	1135	13160.4	16400.9	-0.317575	4.17426	4.21487	8.33413	0.0489865
AAEL010318	628	Polyadenylate-binding protein [Source:UniProtKB/TrEMBL;Acc:Q1HR66]	RRM_dom;PABP_HYD;RRM_dom_euk;PABP_1234	IPR000504;IPR002004;IPR003954;IPR006515	GO:0003723;GO:0005737;GO:0003676	9.78	69894.7	485.925	AAEL010318-PA	6	0.955414	7	1.11465	9.71	0.0074			11521.2	4722	4083	20326.2	22447	19112	4066	5520.66	4700.44	0.232044	4.35116	3.67214	7.41413	0.0471384
AAEL003873	726	Glycerol-3-phosphate dehydrogenase [Source:UniProtKB/TrEMBL;Acc:Q17E82]	G3P_DH_FAD-dep;EF_hand_dom;FAD-dep_OxRdtase;EF-hand-dom_pair;EF_Hand_1_Ca_BS;FAD/NAD-binding_dom;DAO_C	IPR000447;IPR002048;IPR006076;IPR011992;IPR018247;IPR023753;IPR031656	GO:0016491;GO:0055114;GO:0005509;GO:0006072;GO:0009331;GO:0004368;GO:0052591	7.65	81711.4	328.316	AAEL003873-PA	6	0.826446	8	1.10193	11.43	0.026			5036	8355.67	8429.06	21820.7	1113	3818	2683	414.834	1423.03	-1.77836	3.0465	3.15322	5.77109	0.0421534
AAEL013381	1099	integrin alpha-ps	Integrin_alpha;FG-GAP;Int_alpha_beta-p;Integrin_alpha-2;Integrin_alpha_C_CS;Integrin_dom	IPR000413;IPR013517;IPR013519;IPR013649;IPR018184;IPR032695	GO:0007155;GO:0008305;GO:0007229	4.91	124177	186.266	AAEL013381-PA	10	0.909918	12	1.0919	13.1	0.0314	SignalP-noTM	TMhelix	0	10892.5	8507.44	19399.9	16	36	3493	4.58059	10.3063	-1.16993	1.20412	1.0131	1.67404	0.0381836
AAEL002495	275		Chitin-bd_dom	IPR002557	GO:0005576;GO:0008061;GO:0006030	5	30674.9	2685.65	AAEL002495-PA	2	0.727273	3	1.09091	15.27	0	SignalP-noTM		16033	6641.25	0	22674.2	3215	7394	1114	2886	6637.34	-1.20154	3.50718	3.82199	7.28229	0.0377886
AAEL010416	277		Clarin	IPR026748	GO:0016021	4.47	30700.3	455.664	AAEL010416-PA	2	0.722022	3	1.08303	13.36	0.0115		TMhelix	8069.17	8778.33	5087.75	21935.2	413	410	1457	283.459	281.4	0.0105179	2.61595	2.44932	4.90182	0.0346415
AAEL011471	186	60S ribosomal protein L17 [Source:UniProtKB/Swiss-Prot;Acc:Q1HR65]	Ribosomal_L22;Ribosomal_L22/L17_euk/arc;Ribosomal_L22/L17_CS	IPR001063;IPR005721;IPR018260	GO:0003735;GO:0006412;GO:0005622;GO:0005840;GO:0015934	10.72	21899.3	316.089	AAEL011471-PA	2	1.07527	2	1.07527	10.75	0.026			7309.5	2860	12188	22357.5	16514	27608	820	20139	33668.3	-0.741397	4.21785	4.52722	8.83126	0.0315171
AAEL011500	187	Cdc42 protein, putative	Small_GTPase;Small_GTP-bd_dom;P-loop_NTPase	IPR001806;IPR005225;IPR027417	GO:0003924;GO:0005525	5.11	21639.4	423.876	AAEL011500-PA	2	1.06952	2	1.06952	10.16	0.0158			3051.25	3263.25	3719.5	10034	93	139	1053	88.3191	132.004	-0.579782	1.96848	2.12059	4.06664	0.0291884
AAEL003694	846					4.83	98376.6	321.985	AAEL003694-PA	8	0.945626	9	1.06383	10.64	0.026			6965.5	8094.83	9770.61	24830.9	20	29	2541	7.87092	11.4128	-0.536053	1.30103	1.05739	1.95343	0.0268721
AAEL008481	189	60S ribosomal protein L18 [Source:UniProtKB/Swiss-Prot;Acc:Q1HR62]	Ribosomal_L18e;Ribosomal_L18e/L15P	IPR000039;IPR021131	GO:0003735;GO:0006412;GO:0005622;GO:0005840	11	15582	3769.12	AAEL008481-PB	2	1.0582	2	1.0582	18.25	0			16199.5	2935.25	6066.67	25201.4	15038	23924	738	20376.7	32417.3	-0.669846	4.17719	4.51078	8.81991	0.0245682
AAEL006516	475	vacuolar ATP synthase subunit h	Armadillo;ATPase_V1-cplx_hsu;ATPase_V1-cplx_hsu_C;ARM-like;ARM-type_fold	IPR000225;IPR004908;IPR011987;IPR011989;IPR016024	GO:0005488;GO:0015991;GO:0046961;GO:0000221;GO:0016820;GO:0005515	5.91	55188.3	518.883	AAEL006516-PA	5	1.05263	5	1.05263	12.84	0.0053			4818.5	9423	13549.1	27790.6	1511	1230	2166	697.599	567.867	0.296845	3.17926	2.75425	5.59785	0.0222764
AAEL008844	191	calcium-binding protein, putative	EF_hand_dom;EF-hand-dom_pair;EF_Hand_1_Ca_BS	IPR002048;IPR011992;IPR018247	GO:0005509	4.45	22137.9	878.897	AAEL008844-PA	2	1.04712	2	1.04712	16.23	0			11274.8	3728.75	3650.5	18654	4276	14343	576	7423.61	24901	-1.74601	3.63104	4.39622	8.26683	0.0199966
AAEL011343	669		Cadherin;Cadherin-like;Cadherin_CS	IPR002126;IPR015919;IPR020894	GO:0016020;GO:0016021;GO:0005509;GO:0007156;GO:0007155;GO:0005886	4.59	75825.6	1404.78	AAEL011343-PA	7	1.04634	7	1.04634	13.75	0	SignalP-noTM		10144.2	16260.9	5016	31421.1	92	208	2010	45.7711	103.483	-1.17688	1.96379	2.01487	3.67546	0.0196719
AAEL010330	289	Succinate dehydrogenase [ubiquinone] iron-sulfur subunit, mitochondrial [Source:UniProtKB/TrEMBL;Acc:Q16TA7]	2Fe-2S_ferredoxin-type;Succ_DH/fum_Rdtase_Fe-S;2Fe2S_fd_BS;Helical_ferredxn;Beta-grasp_dom;4Fe4S_Fe-S-bd;4Fe4S_Fe_S_CS;Succ_DH/fum_Rdtase_N	IPR001041;IPR004489;IPR006058;IPR009051;IPR012675;IPR017896;IPR017900;IPR025192	GO:0009055;GO:0016491;GO:0055114;GO:0046872;GO:0051539;GO:0051536;GO:0051537;GO:0005743;GO:0006099;GO:0051538;GO:0008177	8.63	33196	696.43	AAEL010330-PA	3	1.03806	3	1.03806	12.46	0.0029			4173.25	2718	8881.75	15773	2116	3306	1624	1302.96	2035.71	-0.643747	3.32552	3.30872	6.42365	0.0162234
AAEL010284	386	aliphatic nitrilase, putative	C-N_Hydrolase	IPR003010	GO:0016810;GO:0006807	6.01	43950.6	455.49	AAEL010284-PA	3	0.777202	4	1.03627	9.07	0.0115			10159.8	3020.5	4678	17858.3	316	198	2356	134.126	84.0407	0.674424	2.49969	1.92449	4.052	0.0154727
AAEL008893	483	xaa-pro dipeptidase pepd/pepq(e.coli)	Pept_M24;Peptidase_M24B_aminopep-P_CS;Aminopep_P_N;Creatinase/Aminopeptidase_P_N;Creatin/AminoP/Spt16_NTD	IPR000994;IPR001131;IPR007865;IPR028980;IPR029149	GO:0004177;GO:0030145	5.25	54021.5	426.445	AAEL008893-PA	4	0.828157	5	1.0352	9.11	0.0158			25224	11999.5	3867.5	41091	340	431	1642	207.065	262.485	-0.342153	2.53148	2.4191	4.73521	0.0150229
AAEL003993	292	cyclohex-1-ene-1-carboxyl-CoA hydratase, putative	Crotonase_core_superfam;Crontonase_C;Enoyl-CoA_hyd/isom_CS;ClpP/crotonase-like_dom	IPR001753;IPR014748;IPR018376;IPR029045	GO:0003824;GO:0008152	8.56	31929.5	433.072	AAEL003993-PA	2	0.684932	3	1.0274	8.22	0.0158			3374.25	0	5523	8897.25	1887	871	1723	1095.18	505.514	1.11535	3.27577	2.70373	5.74322	0.0117384
AAEL001759	195	40S ribosomal protein S9	Ribosomal_S4/S9_N;S4_RNA-bd;Ribosomal_S4/S9_euk/arc;Ribosomal_S4_CS;Ribosomal_S4/S9	IPR001912;IPR002942;IPR005710;IPR018079;IPR022801	GO:0003735;GO:0006412;GO:0005622;GO:0003723;GO:0019843;GO:0015935	11.03	22798.7	454.872	AAEL001759-PA	2	1.02564	2	1.02564	9.23	0.0115			4516	1647	4874	11037	10308	15285	862	11958.2	17732	-0.568352	4.01317	4.24876	8.32643	0.0109954
AAEL005676	488	adenosine deaminase	A/AMP_deaminase_dom;ADGF;A_deaminase_N;Metal_Hydrolase	IPR001365;IPR006331;IPR013659;IPR032466	GO:0005615;GO:0019239	5.45	56114.8	404.724	AAEL005676-PA	5	1.02459	5	1.02459	12.91	0.0197			8064.67	3525.33	0	11590	54	43	1873	28.8308	22.9578	0.328623	1.73239	1.36093	2.82079	0.0105502
AAEL005415	391	Ferrochelatase [Source:UniProtKB/TrEMBL;Acc:Q17A56]	Ferrochelatase;Ferrochelatase_AS;Ferrochelatase_C;Ferrochelatase_N	IPR001015;IPR019772;IPR033644;IPR033659	GO:0004325;GO:0006783	9.03	44844.4	538.642	AAEL005415-PA	4	1.02302	4	1.02302	13.04	0.0053			1836.5	8915.5	9090.56	19842.6	249	211	1460	170.548	144.521	0.238903	2.3962	2.15993	4.39178	0.00988323
AAEL010814	393	isocitrate dehydrogenase	Isocitrate_DH_NAD;IsoPropMal-DH-like_dom	IPR004434;IPR024084	GO:0055114;GO:0016616;GO:0004449;GO:0006099	6.52	42560.4	156.672	AAEL010814-PC	3	0.763359	4	1.01781	12.5	0.0314			0	0	2692.11	2692.11	1322	2999	1475	896.271	2033.22	-1.18176	3.12123	3.30818	6.26062	0.00766744
AAEL013614	1677	Clathrin heavy chain [Source:UniProtKB/TrEMBL;Acc:Q16IM0]	Clathrin_H-chain/VPS_repeat;Clathrin_H-chain_propeller_N;TPR-like_helical_dom;Clathrin_H-chain_linker;Clathrin_H-chain_linker_core;ARM-type_fold;Clathrin_heavy_chain;Clathrin_H-chain_propeller_rpt	IPR000547;IPR001473;IPR011990;IPR012331;IPR015348;IPR016024;IPR016341;IPR022365	GO:0071439;GO:0032051;GO:0005488;GO:0006886;GO:0016192;GO:0005198;GO:0030130;GO:0030132;GO:0048268;GO:0005515	5.43	193282	255.308	AAEL013614-PA	16	0.954085	17	1.01371	12.46	0.0308			6340	6268.75	11534.7	24143.4	3732	3489	5879	634.802	593.468	0.0971354	3.57194	2.7734	5.57604	0.00591586
AAEL003625	406	Clip-Domain Serine Protease family B.	Trypsin_dom;Peptidase_S1A;Peptidase_S1_PA;TRYPSIN_HIS;CLIP;TRYPSIN_SER	IPR001254;IPR001314;IPR009003;IPR018114;IPR022700;IPR033116	GO:0006508;GO:0004252	6	46056.1	397.197	AAEL003625-PA	4	0.985222	4	0.985222	13.05	0.0197	SignalP-noTM		3668.25	4537.67	11028.5	19234.4	479	1387	1221	392.301	1135.95	-1.53387	2.68034	3.05536	5.64898	-0.00646604
AAEL011206	409	aminoacylase, putative	Peptidase_M20;N-acyl_aa_amidohydrolase;Peptidase_M20_dimer	IPR002933;IPR010159;IPR011650	GO:0016787;GO:0046872;GO:0005737;GO:0008152;GO:0006520;GO:0004046	5.08	46878.6	906.195	AAEL011206-PA	4	0.977995	4	0.977995	13.94	0			11198.5	4572.83	4473.36	20244.7	179	434	2079	86.0991	208.754	-1.27774	2.25285	2.31964	4.25463	-0.00966332
AAEL008478	308		DUF1397	IPR009832		4.92	35351.2	1031.12	AAEL008478-PA	3	0.974026	3	0.974026	12.34	0	SignalP-noTM		7992.83	2824	0	10816.8	348	177	1494	232.932	118.474	0.975338	2.54158	2.07362	4.44085	-0.0114295
AAEL010599	1662	neutral alpha-glucosidase ab precursor (glucosidase ii alpha subunit) (alpha glucosidase 2)	Glyco_hydro_31;Gal_mutarotase_SF_dom;Glycoside_hydrolase_SF;Glyco_hydro_31_N_dom;Glyco_hydro_31_AS	IPR000322;IPR011013;IPR017853;IPR025887;IPR030458	GO:0005975;GO:0004553;GO:0003824;GO:0030246	5.56	191570	513.742	AAEL010599-PA	13	0.78219	16	0.962696	10.11	0.0074			15976.3	6750	5974.33	28700.7	840	509	5272	159.332	96.5478	0.722724	2.92428	1.98474	4.18705	-0.016511
AAEL003298	520	Alkaline phosphatase [Source:UniProtKB/TrEMBL;Acc:Q17FS9]	Alkaline_phosphatase;Alkaline_Pase-like_a/b/a;Alkaline_phosphatase_core;Alkaline_phosphatase_AS	IPR001952;IPR017849;IPR017850;IPR018299	GO:0016791;GO:0003824;GO:0008152;GO:0004035	5.1	58370.9	1472.91	AAEL003298-PA	4	0.769231	5	0.961538	10.96	0	SignalP-noTM		10550.9	13009.9	4490.25	28051.1	624	1766	1695	368.142	1041.89	-1.50087	2.79518	3.01782	5.58384	-0.0170333
AAEL015110	742	dipeptidyl-peptidase	Peptidase_S9;Peptidase_S9B_N;AB_hydrolase	IPR001375;IPR002469;IPR029058	GO:0006508;GO:0008236	4.68	84954.4	1001.72	AAEL015110-PA	4	0.539084	7	0.943396	6.87	0	SignalP-noTM		8584	3015.5	9134.75	20734.2	203	141	2290	88.6463	61.5721	0.525785	2.3075	1.78938	3.73705	-0.0253059
AAEL012135	321	Galectin [Source:UniProtKB/TrEMBL;Acc:Q16MZ7]	Galectin_CRD;ConA-like_dom	IPR001079;IPR013320	GO:0030246	4.91	36724.4	521.859	AAEL012135-PB	3	0.934579	3	0.934579	15.58	0.0053			4222.5	6655.33	6123.75	17001.6	110	220	966	113.872	227.743	-1	2.04139	2.35745	4.41386	-0.0293838
AAEL013536	216	ubiquitin (ribosomal protein L40)	Ubiquitin_dom;Ribosomal_S27a;Ribosomal_zn-bd;Ubiquitin_CS;Ubiquitin;Ubiquitin-rel_dom	IPR000626;IPR002906;IPR011332;IPR019954;IPR019956;IPR029071	GO:0003735;GO:0006412;GO:0005840;GO:0005515	9.87	25085.9	13033	AAEL013536-PA	2	0.925926	2	0.925926	8.8	0			28779.8	7347.25	8667.5	44794.5	10039	14235	1002	10019	14206.6	-0.503827	4.00169	4.15249	8.15331	-0.0334238
AAEL000328	437		GroES-like;NAD(P)-bd_dom;PKS_ER	IPR011032;IPR016040;IPR020843	GO:0016491	5.8	47831.8	713.452	AAEL000328-PA	4	0.915332	4	0.915332	15.56	0.0029			4203.5	4656.17	9898.72	18758.4	558	1147	4209	132.573	272.511	-1.03953	2.74663	2.43538	4.55784	-0.0384214
AAEL013625	219	40S ribosomal protein S5	Ribosomal_S5/S7;Ribosomal_S5/S7_euk/arc;Ribosomal_S7_CS;Ribosomal_S7_dom	IPR000235;IPR005716;IPR020606;IPR023798	GO:0003735;GO:0006412;GO:0003723;GO:0015935	9.83	24807.4	295.409	AAEL013625-PA	2	0.913242	2	0.913242	12.79	0.026			7034.5	8780.5	10073	25888	10050	16138	1110	9054.05	14538.7	-0.683266	4.00217	4.16253	8.11937	-0.0394141
AAEL006372	657	sulphate transporter	SLC26A/SulP_fam;STAS_dom;SLC26A/SulP_dom	IPR001902;IPR002645;IPR011547	GO:0016020;GO:0016021;GO:0015116;GO:0055085;GO:0008271;GO:0008272	8.77	72228.8	1229.32	AAEL006372-PA	4	0.608828	6	0.913242	7	0		TMhelix	6121.08	4981.08	24202.2	35304.3	84	564	3095	27.1405	182.229	-2.74723	1.92428	2.26062	3.69424	-0.0394141
AAEL018061	662		Hsp_70_fam;Heat_shock_70_CS;HSP70_peptide-bd;HSP70_C	IPR013126;IPR018181;IPR029047;IPR029048	GO:0005524;GO:0006457;GO:0051082	4.74	73496.7	1008.89	AAEL018061-PA	4	0.60423	6	0.906344	12.39	0	SignalP-noTM		5400.5	7188.08	13904	26492.6
AAEL003225	225		Insect_cuticle;CHIT_BIND_RR_consensus	IPR000618;IPR031311	GO:0042302	4.51	23692.1	379.621	AAEL003225-PA	2	0.888889	2	0.888889	13.78	0.0197	SignalP-noTM		37097	23732.2	5097	65926.2	0	0	737	0	0					-0.0511525
AAEL000748	580					5.73	66695.1	319.561	AAEL000748-PA	4	0.689655	5	0.862069	8.97	0.026	SignalP-noTM	TMhelix	4899.67	5976.5	10876.6	21752.7	380	460	1941	195.775	236.991	-0.275634	2.57978	2.37473	4.66649	-0.064458
AAEL003212	698	protease m1 zinc metalloprotease	Peptidase_M1;Peptidase_M1_N;ERAP1-like_C_dom	IPR001930;IPR014782;IPR024571	GO:0008270;GO:0006508;GO:0008237	5.93	80555.5	1200.72	AAEL003212-PA	4	0.573066	6	0.859599	6.73	0			27243.9	29598.1	22938.8	79780.8	7	39	2213	3.16313	17.6231	-2.47805	0.845098	1.24608	1.74622	-0.0657042
AAEL007761	239	chloride intracellular channel	Glutathione-S-Trfase_C-like;Thioredoxin-like_fold	IPR010987;IPR012336		7.63	28166.7	193.987	AAEL007761-PA	2	0.83682	2	0.83682	9.21	0.0314			1320	1511.5	5027.17	7858.67	751	509	2075	361.928	245.301	0.561147	2.87564	2.3897	4.94832	-0.0773679
AAEL011778	604	WD-repeat protein	WD40_repeat;WD40/YVTN_repeat-like_dom;WD40_repeat_dom;WD40_repeat_CS;G-protein_beta_WD-40_rep	IPR001680;IPR015943;IPR017986;IPR019775;IPR020472	GO:0005515	6.1	66426.3	302.732	AAEL011778-PA	4	0.662252	5	0.827815	10.76	0.026			13224.7	10770.7	6777.5	30772.8	1180	663	2528	466.772	262.263	0.831706	3.07188	2.41874	5.08784	-0.0820669
AAEL005961	376	actin	Actin;Actin_CS;Actin/actin-like_CS	IPR004000;IPR004001;IPR020902	GO:0005524;GO:0005856;GO:0005737	5.14	41984.9	15096.9	AAEL005961-PA	3	0.797872	3	0.797872	5.05	0			7640.5	2119.75	13312.3	23072.6	3762	21248	2307	1630.69	9210.23	-2.49776	3.57542	3.96427	7.17664	-0.0980666
AAEL003467	251		DUF1397	IPR009832		4.24	28615.1	629.597	AAEL003467-PA	2	0.796813	2	0.796813	11.16	0.0053	SignalP-noTM		20311.2	11832.5	5253	37396.8	105	934	1536	68.3594	608.073	-3.15303	2.02119	2.78396	4.61875	-0.0986437
AAEL004739	630	acyl-coa dehydrogenase	Acyl-CoA_DH_CS;Acyl-CoA_Oxase/DH_cen-dom;AcylCo_DH/oxidase_C;AcylCoA_DH/oxidase_NM_dom;AcylCoA_DH/ox_N	IPR006089;IPR006091;IPR009075;IPR009100;IPR013786	GO:0055114;GO:0050660;GO:0008152;GO:0016627;GO:0003995	7.93	69621.3	289.015	AAEL004739-PA	4	0.634921	5	0.793651	9.05	0.0308			0	0	2146.06	2146.06	1117	1337	2432	459.293	549.753	-0.25937	3.04805	2.74017	5.40226	-0.100371
AAEL010884	257	ADP,ATP carrier protein	Mit_carrier;Aden_trnslctor;Mitochondrial_sb/sol_carrier;Mt_carrier_dom	IPR002067;IPR002113;IPR018108;IPR023395	GO:0016021;GO:0005215;GO:0006810;GO:0005743;GO:0055085	9.92	28869.5	2751.81	AAEL010884-PA	2	0.77821	2	0.77821	8.17	0		TMhelix	0	0	1701.83	1701.83	3771	19046	835	4516.17	22809.6	-2.33647	3.57646	4.35812	8.01289	-0.108903
AAEL004580	656	Beta-galactosidase [Source:UniProtKB/TrEMBL;Acc:Q17CH4]	Glycoside_Hdrlase_35;Galactose-bd-like;Glycoside_hydrolase_SF;Glyco_hydro_35_CS;B-gal_1-like;Gly_Hdrlase_35_cat	IPR001944;IPR008979;IPR017853;IPR019801;IPR026283;IPR031330	GO:0005975;GO:0016021;GO:0004553;GO:0004565	4.68	74143.9	346.761	AAEL004580-PA	5	0.762195	5	0.762195	8.99	0.0225		TMhelix	9825.5	5149.17	1497	16471.7	110	67	2123	51.8135	31.5591	0.715271	2.04139	1.49912	3.21357	-0.117934
AAEL003550	264	aquaporin	MIP;Aquaporin-like;Aquaporin_transptr	IPR000425;IPR023271;IPR034294	GO:0016020;GO:0016021;GO:0005215;GO:0006810	6.22	28322.6	1336.28	AAEL003550-PA	2	0.757576	2	0.757576	9.85	0		TMhelix	0	16840.2	8315.83	25156.1	157	1240	795	197.484	1559.75	-2.9815	2.1959	3.19305	5.48859	-0.120574
AAEL014913	529	Pyruvate kinase [Source:UniProtKB/TrEMBL;Acc:Q16F38]	Pyr_Knase;Pyrv_Knase-like_insert_dom;Pyrv_Knase_brl;Pyrv_Knase_C;Pyrv/PenolPyrv_Kinase-like_dom;Pyrv_Knase_AS	IPR001697;IPR011037;IPR015793;IPR015795;IPR015813;IPR018209	GO:0006096;GO:0003824;GO:0016301;GO:0000287;GO:0004743;GO:0030955	7.13	58084.7	2197.36	AAEL014913-PA	3	0.567108	4	0.756144	5.1	0			4085	1387	0	5472	297	994	2422	122.626	410.405	-1.74278	2.47276	2.61321	4.7018	-0.121396
AAEL010697	398	3-ketoacyl-coa thiolase, mitochondrial (beta- ketothiolase) (acetyl-coa acyltransferase) (mitochondrial 3-oxoacyl- coa thiolase)	Thiolase;Thiolase-like;Thiolase_AS;Thiolase_CS;Thiolase_acyl_enz_int_AS;Thiolase_N;Thiolase_C	IPR002155;IPR016039;IPR020610;IPR020613;IPR020615;IPR020616;IPR020617	GO:0003824;GO:0008152;GO:0016747	8.71	41967.3	715.717	AAEL010697-PA	3	0.753769	3	0.753769	12.81	0.0029			0	0	9371.78	9371.78	304	475	1458	208.505	325.789	-0.643856	2.48287	2.51294	4.83205	-0.122762
AAEL007420	414	Serine Protease Inhibitor (serpin) homologue - unlikely to be inhibitory	Serpin_fam;Serpin_dom	IPR000215;IPR023796	GO:0005615	9.54	47735.2	618.847	AAEL007420-PB	3	0.724638	3	0.724638	8.7	0.0053	SignalP-noTM		5544.75	7066.5	7801.5	20412.8	200	282	1245	160.643	226.506	-0.495695	2.30103	2.35508	4.56094	-0.139879
AAEL000703	845	glycogen phosphorylase	Glyco_trans_35;Glycg_phsphrylas;Pyridoxal_P_attach_site	IPR000811;IPR011833;IPR035090	GO:0005975;GO:0030170;GO:0004645;GO:0008184	5.88	97412.8	299.182	AAEL000703-PA	5	0.591716	6	0.710059	7.46	0.026			2570	1466.25	5651.5	9687.75	3328	3207	3443	966.599	931.455	0.0534311	3.52218	2.96916	5.95441	-0.148705
AAEL003424	289	zinc carboxypeptidase	Peptidase_M14;IGCP-like_CPD	IPR000834;IPR034223	GO:0008270;GO:0006508;GO:0004181	5.17	32745.8	603.898	AAEL003424-PA	2	0.692042	2	0.692042	7.61	0.0053			9736	4959.25	3155.25	17850.5	39	234	1441	27.0645	162.387	-2.58496	1.59106	2.21055	3.64295	-0.159868
AAEL003046	1024	saposin	SAP_A;SapB_1;SapB_2;SaposinB_dom;Saposin;Saposin-like	IPR003119;IPR007856;IPR008138;IPR008139;IPR008373;IPR011001	GO:0006629;GO:0006665;GO:0005764	4.76	118249	455.926	AAEL003046-PA	6	0.585938	7	0.683594	8.69	0.0115	SignalP-noTM		26044.5	13380.8	4916.33	44341.7	3223	3522	3823	843.055	921.266	-0.127991	3.50826	2.96439	5.89024	-0.165202
AAEL015386	742	dipeptidyl-peptidase	Peptidase_S9;Peptidase_S9B_N;AB_hydrolase	IPR001375;IPR002469;IPR029058	GO:0006508;GO:0008236	4.73	84918.5	1103.83	AAEL015386-PA	5	0.673854	5	0.673854	7.28	0	SignalP-noTM		6518.17	8931.5	4174.67	19624.3	601	426	4180	143.78	101.914	0.496512	2.77887	2.00823	4.16593	-0.171434
AAEL018258	1638		Cystatin_dom;Pept_cys_AS;Peptidase_C1A_C;Peptidase_C1A;Prot_inhib_I29;Pept_his_AS;Pept_asp_AS	IPR000010;IPR000169;IPR000668;IPR013128;IPR013201;IPR025660;IPR025661	GO:0004869;GO:0006508;GO:0008234	5.81	186245	339.175	AAEL018258-PA	8	0.4884	11	0.671551	6.35	0.0243	SignalP-noTM	TMhelix	27091	16470.3	14307.5	57868.8
AAEL005656	1940	myosin heavy chain, nonmuscle or smooth muscle	IQ_motif_EF-hand-BS;Myosin_head_motor_dom;Myosin_tail;Myosin_N;P-loop_NTPase	IPR000048;IPR001609;IPR002928;IPR004009;IPR027417	GO:0005524;GO:0003774;GO:0016459;GO:0003779;GO:0005515	5.64	222490	2634.64	AAEL005656-PA	9	0.463918	13	0.670103	6.19	0			11387.8	8814	27384.1	47585.9	378	652	6060	62.3762	107.591	-0.786486	2.57749	2.03177	3.8268	-0.173858
AAEL009932	1194	lethal giant larva homologue	Lethal2_giant;LLGL2;WD40/YVTN_repeat-like_dom;WD40_repeat_dom	IPR000664;IPR013577;IPR015943;IPR017986	GO:0005515	5.78	130377	253.712	AAEL009932-PA	7	0.586265	8	0.670017	7.29	0.0308			3747	4743	5731.89	14221.9	1935	1538	5631	343.633	273.131	0.331278	3.28668	2.43637	4.97247	-0.173914
AAEL002841	305	3-hydroxyacyl-coa dehyrogenase	3HC_DH_C;3-OHacyl-CoA_DH_NAD-bd;3-OHacyl-CoA_DH_CS;6-PGluconate_DH_C-like;6PGD_dom_2;NAD(P)-bd_dom;3-OHacyl-CoA_DH	IPR006108;IPR006176;IPR006180;IPR008927;IPR013328;IPR016040;IPR022694	GO:0016491;GO:0055114;GO:0070403;GO:0003857;GO:0006631	9.15	33455.8	1091.48	AAEL002841-PA	2	0.655738	2	0.655738	6.89	0		TMhelix	9672	4206	6021.17	19899.2	412	565	939	438.765	601.704	-0.455607	2.6149	2.77938	5.42161	-0.18327
AAEL000795	305	ubiquitin	Ubiquitin_dom;Ubiquitin_CS;Ubiquitin;Ubiquitin-rel_dom	IPR000626;IPR019954;IPR019956;IPR029071	GO:0005515	7.74	34319.5	13033	AAEL000795-PA	2	0.655738	2	0.655738	5.9	0			12123.7	4599.17	5279.5	22002.3	0	0	918	0	0					-0.18327
AAEL004227	1229	myosin VI	IQ_motif_EF-hand-BS;Myosin_head_motor_dom;P-loop_NTPase;Myosin-VI_CBD	IPR000048;IPR001609;IPR027417;IPR032412	GO:0005524;GO:0003774;GO:0016459;GO:0005515	8.79	142794	275.421	AAEL004227-PB	9	0.732303	8	0.650936	9.44	0.0308			9217.08	7418	16412	33047.1	985	1984	4230	232.861	469.031	-1.01022	2.99344	2.6712	5.0383	-0.186462
AAEL003601	316					5.01	36421.6	418.667	AAEL003601-PA	2	0.632911	2	0.632911	8.86	0.0158	SignalP-noTM		41279.8	60715.8	17491.5	119487	473	611	1483	318.948	412.003	-0.369332	2.67486	2.6149	5.11862	-0.198657
AAEL010372	1278	aldehyde oxidase	Ald_Oxase/Xan_DH_a/b;2Fe-2S_ferredoxin-type;Mopterin_DH_FAD-bd;2Fe-2S-bd;CO_DH_flav_C;2Fe2S_fd_BS;AldOxase/xan_DH_Mopterin-bd;Beta-grasp_dom;FAD-bd_2;FAD-bd_2_sub1;CO_DH_flavot_FAD-bd_sub2;Ald_Oxase/xanthine_DH	IPR000674;IPR001041;IPR002346;IPR002888;IPR005107;IPR006058;IPR008274;IPR012675;IPR016166;IPR016167;IPR016169;IPR016208	GO:0009055;GO:0016491;GO:0055114;GO:0016614;GO:0050660;GO:0003824;GO:0046872;GO:0005506;GO:0051536;GO:0051537	6.81	142057	468.943	AAEL010372-PA	5	0.391236	8	0.625978	5.32	0.0115			6065.5	8610.08	10842	25517.6	20	20	3922	5.09944	5.09944	0	1.30103	0.707522	1.41506	-0.203441
AAEL012554	1438	maltose phosphorylase	Glyco_hydro_65_M;6-hairpin_glycosidase-like	IPR005195;IPR008928	GO:0005975;GO:0003824	5.18	164234	380.916	AAEL012554-PA	8	0.556328	9	0.625869	8.28	0.0197			55127.7	26186.8	2925	84239.5	13	67	4317	3.01135	15.52	-2.36565	1.11394	1.19089	1.66967	-0.203516
AAEL007703	481					5.29	53142.5	389.824	AAEL007703-PA	3	0.623701	3	0.623701	8.32	0.0197	SignalP-noTM		6374	1992.5	1773	10139.5	647	1525	1554	416.345	981.338	-1.23697	2.8109	2.99182	5.61127	-0.205024
AAEL006390	804	vacuolar proton ATPases	V-ATPase_116kDa_su;V-type_ATPase_116kDa_su_euka	IPR002490;IPR026028	GO:0016021;GO:0015078;GO:0015991;GO:0033179;GO:0000220	5.94	92805.7	307.068	AAEL006390-PA	4	0.497512	5	0.621891	5.85	0.026		TMhelix	4204	4673	4597.25	13474.2	977	965	2609	374.473	369.874	0.0178296	2.98989	2.56805	5.14147	-0.206286
AAEL006582	998	calcium-transporting ATPase sarcoplasmic/endoplasmic reticulum type	P_typ_ATPase;ATPase_P-typ_cation-transptr_N;P-type_ATPase_IIA;ATPase_P-typ_cation-transptr_C;ATPase_P-typ_transduc_dom_A;ATPase_P-typ_P_site;HAD-like_dom;ATPase_P-typ_TM_dom;ATPase_P-typ_cyto_domN;SERCA2	IPR001757;IPR004014;IPR005782;IPR006068;IPR008250;IPR018303;IPR023214;IPR023298;IPR023299;IPR030327	GO:0005524;GO:0016021;GO:0046872;GO:0005783;GO:0000166;GO:0005388;GO:0033017;GO:0070588;GO:0006816	5.19	110625	334.679	AAEL006582-PA	6	0.601202	6	0.601202	8.82	0.0243		TMhelix	0	2972.5	7709.06	10681.6	18968	30110	5444	3484.2	5530.86	-0.666675	4.27802	3.74279	7.2849	-0.220979
AAEL008574	669	acyl-CoA oxidase	Acyl-CoA_oxidase_C;Acyl-CoA_Oxase/DH_cen-dom;AcylCo_DH/oxidase_C;AcylCoA_DH/oxidase_NM_dom;Acyl-CoA_oxidase;AcylCoA_DH/ox_N;Acyl-CoA_ox_N	IPR002655;IPR006091;IPR009075;IPR009100;IPR012258;IPR013786;IPR029320	GO:0055114;GO:0050660;GO:0008152;GO:0016627;GO:0003997;GO:0006635;GO:0005777;GO:0071949;GO:0003995;GO:0006631	6.79	75759.7	407.772	AAEL008574-PA	4	0.597907	4	0.597907	7.03	0.0197			1727	0	6437.14	8164.14	642	880	3002	213.857	293.138	-0.45493	2.80754	2.46707	4.7972	-0.223366
AAEL007718	688	Eukaryotic translation initiation factor 3 subunit B (eIF3b)(Eukaryotic translation initiation factor 3 subunit 9)	RRM_dom;EIF3B;TIF_beta_prop-like;WD40/YVTN_repeat-like_dom;eIF3B_RRM	IPR000504;IPR011400;IPR013979;IPR015943;IPR034363	GO:0003723;GO:0003676;GO:0003743;GO:0006413;GO:0005852;GO:0031369;GO:0006446;GO:0005515	5.43	80459.7	286.384	AAEL007718-PA	4	0.581395	4	0.581395	5.67	0.0308			5757.67	3005	4447	13209.7	2495	3067	2401	1039.15	1277.38	-0.297788	3.39707	3.10632	6.123	-0.235528
AAEL009700	345	beta lactamase domain	Metallo-B-lactamas	IPR001279		6.43	39142.1	334.799	AAEL009700-PB	2	0.57971	2	0.57971	4.93	0.0243			9409.5	4112.5	1822	15344	369	292	2144	172.108	136.194	0.337652	2.56703	2.13416	4.36996	-0.236789
AAEL005725	347		WD40_repeat;WD40/YVTN_repeat-like_dom;WD40_repeat_dom	IPR001680;IPR015943;IPR017986	GO:0005515	4.64	39406.7	386.392	AAEL005725-PA	2	0.576369	2	0.576369	8.36	0.0197			49288	48542.5	21372.5	119203	105	67	1062	98.8701	63.0885	0.648156	2.02119	1.79995	3.79502	-0.239299
AAEL005216	352		PsuG	IPR007342	GO:0016798	6.61	37106.4	232.546	AAEL005216-PA	2	0.568182	2	0.568182	5.97	0.0308			0	0	3343.5	3343.5	792	408	1597	495.93	255.479	0.956931	2.89873	2.40736	5.10278	-0.245513
AAEL006721	1057	2-oxoglutarate dehydrogenase	DH_E1;Transketolase-like_Pyr-bd;2oxoglutarate_DH_E1;THDP-binding;KGD_C;2-oxogl_dehyd_N	IPR001017;IPR005475;IPR011603;IPR029061;IPR031717;IPR032106	GO:0055114;GO:0008152;GO:0006099;GO:0004591;GO:0030976;GO:0016624	6.42	115120	250.605	AAEL006721-PB	5	0.473037	6	0.567644	6.89	0.0308			7990.25	8900	7627.53	24517.8	4479	5940	4698	953.384	1264.37	-0.407286	3.65118	3.10187	6.08114	-0.245924
AAEL011105	710	adducin	Aldolase_II/adducin_N	IPR001303		6.57	79104.3	368.75	AAEL011105-PA	3	0.422535	4	0.56338	8.03	0.0197			0	0	6496.56	6496.56	1703	1545	3763	452.564	410.577	0.140472	3.23121	2.61339	5.26907	-0.249198
AAEL007967	936		EGF-like_dom;Cys_rich_tripleX;Growth_fac_rcpt_	IPR000742;IPR003341;IPR009030	GO:0016021	4.78	147343	218.965	AAEL007967-PB	5	0.534188	5	0.534188	7	0.0314	SignalP-noTM	TMhelix	16057	10603.9	6853.83	33514.7	202	423	3922	51.5043	107.853	-1.0663	2.30535	2.03283	3.74468	-0.272306
AAEL007777	388	vacuolar ATP synthase subunit S1	ATPase_V1-cplx_s1su	IPR008388	GO:0016021;GO:0046933;GO:0015991;GO:0046961;GO:0033180	4.67	43662.4	1495.51	AAEL007777-PA	2	0.515464	2	0.515464	9.54	0	SignalP-noTM	TMhelix	16871.2	20539.2	20690.6	58101	1605	1361	1470	1091.84	925.85	0.237906	3.20548	2.96654	6.0047	-0.287802
AAEL018140	1758		Cadherin;Cadherin-like;Cadherin_CS	IPR002126;IPR015919;IPR020894	GO:0016020;GO:0016021;GO:0005509;GO:0007156;GO:0007155;GO:0005886	4.26	198001	241.478	AAEL018140-PA	9	0.511945	9	0.511945	6.77	0.0308	SignalP-noTM	TMhelix	13891	13222.5	1188	28301.5
AAEL014253	391		DUF89	IPR002791		4.82	45141.7	297.486	AAEL014253-PA	2	0.511509	2	0.511509	6.14	0.026			26421.5	16150	2098	44669.5	15	13	1176	12.7551	11.0544	0.206451	1.17609	1.04354	2.14923	-0.291147
AAEL006113	396	cystinosin	LC_transporter;PQ-loop_rpt	IPR005282;IPR006603	GO:0016021	5.64	44266.1	390.138	AAEL006113-PA	3	0.757576	2	0.505051	10.86	0.0197	SignalP-noTM	TMhelix	6269.5	7177.75	11744.5	25191.8	816	278	1980	412.121	140.404	1.55348	2.91169	2.14738	4.7624	-0.296665
AAEL008041	396	bleomycin hydrolase	Pept_cys_AS;Peptidase_C1B	IPR000169;IPR004134	GO:0006508;GO:0004197	6.92	46252.8	304.534	AAEL008041-PA	2	0.505051	2	0.505051	5.81	0.026			0	0	4196	4196	1487	865	2087	712.506	414.471	0.781633	3.17231	2.61749	5.47028	-0.296665
AAEL013620	203	ras-related protein Rab, putative	Small_GTPase;Small_GTP-bd_dom;P-loop_NTPase	IPR001806;IPR005225;IPR027417	GO:0003924;GO:0005525	9.11	23295.4	384.094	AAEL013620-PA	2	0.985222	1	0.492611	12.32	0.0197			3856.25	4016.5	7195.67	15068.4	264	157	1085	243.318	144.7	0.749773	2.4216	2.16047	4.54664	-0.307496
AAEL000678	609	alpha-amylase	Glyco_hydro_13_cat_dom;Glycoside_hydrolase_SF	IPR006047;IPR017853	GO:0005975;GO:0003824	5.13	70940.9	2029.87	AAEL000678-PA	2	0.328407	3	0.492611	3.94	0	SignalP-noTM		18199.4	6477.5	2105.5	26782.4	11	69	1868	5.88865	36.9379	-2.64909	1.04139	1.56747	2.3375	-0.307496
AAEL001091	624	malic enzyme	Malic_OxRdtase;Malic_N_dom;Malic_NAD-bd;Malic_enzyme_CS;NAD(P)-bd_dom	IPR001891;IPR012301;IPR012302;IPR015884;IPR016040	GO:0055114;GO:0046872;GO:0051287;GO:0006108;GO:0004471;GO:0004470	6.72	69333.1	269.393	AAEL001091-PA	3	0.480769	3	0.480769	7.21	0.0308			6882.42	2474.33	5519.17	14875.9	1314	1702	3137	418.872	542.557	-0.373266	3.1186	2.73445	5.35653	-0.318063
AAEL006322	648		Reeler_dom;DOMON_domain;Cyt_b561/ferric_Rdtase_TM	IPR002861;IPR005018;IPR006593	GO:0016021;GO:0055114	7.68	71146.3	216.926	AAEL006322-PB	3	0.462963	3	0.462963	6.07	0.0314	SignalP-noTM	TMhelix	20862	24700.3	20716	66278.3	1361	917	2597	524.066	353.1	0.569673	3.13386	2.5479	5.26728	-0.334454
AAEL005673	447	Serine Protease Inhibitor (serpin) likely cleavage at K/F.	Serpin_fam;Serpin_CS;Serpin_dom	IPR000215;IPR023795;IPR023796	GO:0005615	5.31	51237.8	186.617	AAEL005673-PA	2	0.447427	2	0.447427	6.49	0.0314			45560.5	46454.8	12670	104685	34	28	1344	25.2976	20.8333	0.280108	1.53148	1.31876	2.72184	-0.349278
AAEL013498	684	prophenoloxidase	Hemocyanin/hexamerin_mid_dom;Tyrosinase_Cu-bd;Hemocyanin_C;Hemocyanin_N;Unchr_di-copper_centre;Hemocyanin/hexamerin;Ig_E-set	IPR000896;IPR002227;IPR005203;IPR005204;IPR008922;IPR013788;IPR014756	GO:0016491;GO:0046872;GO:0008152	6.62	78645.6	233.27	AAEL013498-PA	3	0.438596	3	0.438596	5.99	0.0308			8579.17	5680.83	7434	21694	6	7	2055	2.91971	3.40633	-0.222392	0.778151	0.532286	0.997653	-0.357935
AAEL010668	461	quinone oxidoreductase	GroES-like;ADH_N;NAD(P)-bd_dom;PKS_ER	IPR011032;IPR013154;IPR016040;IPR020843	GO:0016491;GO:0055114	5.45	50841.7	776.838	AAEL010668-PA	2	0.433839	2	0.433839	8.46	0			2830.5	1708	9039.42	13577.9	1321	760	1386	953.102	548.341	0.797559	3.1209	2.73905	5.71819	-0.362671
AAEL009291	481	retinoid-inducible serine carboxypeptidase (serine carboxypeptidase	Peptidase_S10;Ser_caboxypep_ser_AS;AB_hydrolase;Ser_caboxypep_his_AS	IPR001563;IPR018202;IPR029058;IPR033124	GO:0006508;GO:0004185	5.76	54757.8	176.092	AAEL009291-PA	2	0.4158	2	0.4158	5.41	0.0314	SignalP-noTM	TMhelix	4277.75	4332	6055.33	14665.1	429	434	1635	262.385	265.443	-0.0167174	2.63246	2.42397	4.84291	-0.381115
AAEL002467	486		Chitin-bd_dom	IPR002557	GO:0005576;GO:0008061;GO:0006030	4.49	54205.1	675.248	AAEL002467-PA	2	0.411523	2	0.411523	7	0.0029	SignalP-noTM		9237.75	4087.25	1168.5	14493.5	10048	67	1735	5791.35	38.6167	7.22853	4.00208	1.58678	5.34956	-0.385606
AAEL003686	498	Serine Protease Inhibitor (serpin) homologue - unlikely to be inhibitory.	Serpin_fam;Serpin_dom	IPR000215;IPR023796	GO:0005615;GO:0008233	7.15	57250.6	286.403	AAEL003686-PA	2	0.401606	2	0.401606	4.22	0.0308	SignalP-noTM		7553.25	2621.25	1734	11908.5	360	472	1497	240.481	315.297	-0.39079	2.5563	2.49872	4.8798	-0.396199
AAEL003666	615	leukotriene a-4 hydrolase	Peptidase_M1;Leukotriene_A4_hydrolase;Peptidase_M1_N;Peptidase_M1_C;ARM-type_fold;M1_LTA4H	IPR001930;IPR012777;IPR014782;IPR015211;IPR016024;IPR034015	GO:0005488;GO:0008270;GO:0006508;GO:0005737;GO:0004177;GO:0008237;GO:0004463;GO:0019370	5.22	69704.7	217.239	AAEL003666-PA	2	0.325203	2	0.325203	5.37	0.0314			8372	2418.5	4456	15246.5	668	251	2778	240.461	90.3528	1.41216	2.82478	1.95594	4.33699	-0.487845
AAEL001411	1888	myosin heavy chain, nonmuscle or smooth muscle	IQ_motif_EF-hand-BS;Myosin_head_motor_dom;Myosin_tail;P-loop_NTPase;Myosin_N	IPR000048;IPR001609;IPR002928;IPR027417;IPR004009	GO:0005524;GO:0003774;GO:0016459;GO:0005515;GO:0003779	5.28	232024	175.117	AAEL001411-PB	4	0.211864	5	0.264831	2	0.0314		TMhelix	881.5	1649	8041.22	10571.7	3331	2981	7845	424.602	379.987	0.160159	3.52257	2.57977	5.20775	-0.577032
AAEL018318	483		Ubiquitin_dom;IBR_dom;Parkin;Znf_RING/FYVE/PHD;Ubiquitin-rel_dom;E3_UB_ligase_RBR	IPR000626;IPR002867;IPR003977;IPR013083;IPR029071;IPR031127	GO:0005634;GO:0046872;GO:0005739;GO:0004842;GO:0005829;GO:0016567;GO:0000151;GO:0005515	6.18	56196.2	493.935	AAEL018318-PA	2	0.414079	1	0.207039	3.93	0.0074			6447.25	13445.5	6145.5	26038.2
AAEL009617	537	Eukaryotic translation initiation factor 3 subunit L (eIF3l)	TPR-like_helical_dom;eIF3l	IPR011990;IPR019382	GO:0005737;GO:0003743;GO:0005852;GO:0005515	5.8	63927.8	274.38	AAEL009617-PA	2	0.372439	1	0.18622	5.21	0.0308			4741.75	2030.5	6685.33	13457.6	222	260	1898	116.965	136.986	-0.227952	2.34635	2.13668	4.20473	-0.729974

## Sheet: peptide_IDs
cluster	avg_mass	avg_rt	avg_ref_rt	avg_drift_time	intensity in new sample 1 1	intensity in new sample 1 2	intensity in new sample 2 1	intensity in new sample 2 2	intensity in new sample 3 1	intensity in new sample 3 2	intensity in new sample 4 1	intensity in new sample 4 2	intensity in new sample 5 1	intensity in new sample 5 2	intensity in new sample 6 1	intensity in new sample 6 2	intensity in new sample 6 3	workflow_index	sequence	modifier	type	start	end	frag_string	products	peptide_annotated_max_score	peptide_overall_max_score	peptide_fdr_level	peptide_annotated_replication_rate	peptide_overall_replication_rate	signal_mass	signal_intensity	signal_charge	signal_z	signal_fwhm	signal_rt	signal_liftoffrt	signal_infuprt	signal_infdown_rt	signal_touchdownrt	pre_homology_entries	pre_homology_accessions	post_homology_entries	post_homology_accessions	entry	accession	description	mw	pi
3548	585.337	18.63	18.62	86.6845	8057	7867					8759	8659						1	GPGLNK		PEP_FRAG_2	125	130	b3b4b6b6*y2y2*y4y5y5*y6y6*	11	6.887	6.887	0.0005	2	2	585.337	9734	1	1	0.2579	18.6095	18.4329	18.5689	18.6422	18.7782	AAEL013221-PC	AAEL013221-PC	AAEL013221-PC	AAEL013221-PC	AAEL013221-PC	AAEL013221-PC	60S ribosomal protein L10a protein_coding supercont1.808:243305-244507:-1 gene:AAEL013221	24838.4	10.26
3590	586.353	33.22	33.21	86.7875	1416	1290					1498	1403						1	NAILGV		PEP_FRAG_2	109	114	b2b3y3	3	7.048	7.048	0	3	3	586.353	1237	1	1	0.2775	33.2542	33.0461	33.2145	33.3053	33.4737	AAEL001668-PA	AAEL001668-PA	AAEL001668-PA	AAEL001668-PA	AAEL001668-PA	AAEL001668-PA	enolase protein_coding supercont1.38:1462458-1464130:1 gene:AAEL001668	46906.5	6.29
3917	592.343	11.77	11.9	90.2073			1805	1696									1130	3	FGLGAK		PEP_FRAG_1	218	223	b4b5b6y2y3y4y5y6	8	8.521	8.521	0	2	2	592.343	1519	1	1	0.2287	11.7987	11.5858	11.7484	11.8361	11.9987	AAEL001872-PA	AAEL001872-PA	AAEL001872-PA	AAEL001872-PA	AAEL001872-PA	AAEL001872-PA	voltage-dependent anion-selective channel protein_coding supercont1.44:690107-695296:-1 gene:AAEL001872	30810.3	8.87
4961	613.364	27.85	27.74	94.161								1095						8	AIAPLE		PEP_FRAG_2	115	120	b2b4y2y4	4	5.7179	5.7179	0.0038	1	2	613.364	1095	1	1	0.3344	27.8491	27.5092	27.7726	27.9146	28.178	AAEL010821-PA	AAEL010821-PA	AAEL010821-PA	AAEL010821-PA	AAEL010821-PA	AAEL010821-PA	60S acidic ribosomal protein P0 protein_coding supercont1.510:444590-445799:1 gene:AAEL010821	33890	5.3
4963	613.351	42.7	42.67	88.847			2431	2426	1724	1993	2953	3207						7	AIAPLE		PEP_FRAG_1	115	120	y2y2°y3°y4y6	5	5.6487	5.7179	0.0038	1	2	613.352	3710	1	1	0.2153	42.6804	42.5019	42.6412	42.7163	42.8556	AAEL010821-PA	AAEL010821-PA	AAEL010821-PA	AAEL010821-PA	AAEL010821-PA	AAEL010821-PA	60S acidic ribosomal protein P0 protein_coding supercont1.510:444590-445799:1 gene:AAEL010821	33890	5.3
5192	616.365	41.13	41.21	93.813		1677												2	QLSVAV		PEP_FRAG_2	15	20	b3°b5°	2	4.5586	5.7809	0.0038	1	2	616.365	1677	1	1	0.2299	41.1251	40.9092	41.0832	41.177	41.3509	AAEL011090-PA	AAEL011090-PA	AAEL011090-PA	AAEL011090-PA	AAEL011090-PA	AAEL011090-PA	complement component protein_coding supercont1.541:185532-197389:1 gene:AAEL011090	30622.5	4.73
5199	616.364	30.15	30.14	89.5106				1712	3712	3512	2420	2101				4860	5006	8	QLSVAV		PEP_FRAG_2	15	20	b3b5b6b6*y6	5	5.7809	5.7809	0.0038	1	2	616.362	2387	1	1	0.1899	30.2255	30.0482	30.1902	30.2667	30.4087	AAEL011090-PA	AAEL011090-PA	AAEL011090-PA	AAEL011090-PA	AAEL011090-PA	AAEL011090-PA	complement component protein_coding supercont1.541:185532-197389:1 gene:AAEL011090	30622.5	4.73
5457	621.324	29.16	29.11	90.0158	3265		7589	6937				5341	2589					3	SMIISA		PEP_FRAG_1	792	797	b3b4y2y3y6	5	7.3612	7.3612	0	1	3	621.327	7871	1	1	0.3036	29.114	28.9243	29.0703	29.149	29.295	AAEL012778-PA,AAEL012778-PB	AAEL012778-PA,AAEL012778-PB	AAEL012778-PB	AAEL012778-PB	AAEL012778-PB	AAEL012778-PB	protease m1 zinc metalloprotease protein_coding supercont1.739:294698-297654:-1 gene:AAEL012778	102210	4.95
5464	621.331	39.55	39.64	91.683		1346												2	SMIISA		PEP_FRAG_2	792	797	b5y4°	2	6.4296	7.3612	0	1	3	621.331	1346	1	1	0.3556	39.5486	39.2084	39.4785	39.6241	39.8941	AAEL012778-PA,AAEL012778-PB	AAEL012778-PA,AAEL012778-PB	AAEL012778-PB	AAEL012778-PB	AAEL012778-PB	AAEL012778-PB	protease m1 zinc metalloprotease protein_coding supercont1.739:294698-297654:-1 gene:AAEL012778	102210	4.95
5467	621.335	40.42	40.42	93.6547	11252	10226	5990	5643			6799	7007						7	FADIGV		PEP_FRAG_2	44	49	b5b6y4°y6	4	5.9028	5.9028	0.0038	2	3	621.336	11179	1	1	0.2663	40.4144	40.1499	40.3539	40.4638	40.6678	AAEL005766-PB	AAEL005766-PB	AAEL005766-PB	AAEL005766-PB	AAEL005766-PB	AAEL005766-PB	fructose-bisphosphate aldolase protein_coding supercont1.174:169509-197538:-1 gene:AAEL005766	39997.5	8.17
5468	621.333	43.67	43.67	91.0603	6573	6292	4228	4605			4121	4033						1	FADIGV		PEP_FRAG_2	44	49	b4°b5b6y6	4	5.5819	5.9028	0.0038	1	3	621.331	6399	1	1	0.2829	43.7084	43.4877	43.6613	43.7549	43.9286	AAEL005766-PB	AAEL005766-PB	AAEL005766-PB	AAEL005766-PB	AAEL005766-PB	AAEL005766-PB	fructose-bisphosphate aldolase protein_coding supercont1.174:169509-197538:-1 gene:AAEL005766	39997.5	8.17
5510	622.328	22.62	22.67	91.1458	1563	1625	2369	2433										1	GVSGFR		PEP_FRAG_1	212	217	b5y4y6	3	6.9165	6.9165	0.0005	2	3	622.328	1486	1	1	0.1977	22.6886	22.495	22.6507	22.7346	22.8903	AAEL000392-PA,AAEL000392-PB,AAEL009524-PA	AAEL000392-PA,AAEL000392-PB,AAEL009524-PA
5647	625.245	115.71	115.75	86.7791	30098	47608	25985	43716	28753	41264	14840	30606	28488				27981	6	GTGEDF		PEP_FRAG_1	424	429	b4b5°	2	4.9158	5.3503	0.0041	1	2	625.244	3463	1	1	0.2453	115.899	115.641	115.835	115.939	116.132	AAEL012904-PA	AAEL012904-PA	AAEL012904-PA	AAEL012904-PA	AAEL012904-PA	AAEL012904-PA	rab gdp-dissociation inhibitor protein_coding supercont1.757:273696-293775:-1 gene:AAEL012904	50227.2	5.23
5718	626.422	14.07	14.07	98.3135	1585	1413					1993	1839						7	LVIGPK		PEP_FRAG_1	206	211	y3y4y6	3	7.8773	7.8773	0	3	3	626.422	2204	1	1	0.2891	14.0695	13.8747	14.0279	14.1104	14.2636	AAEL008485-PA	AAEL008485-PA	AAEL008485-PA	AAEL008485-PA	AAEL008485-PA	AAEL008485-PA	conserved hypothetical protein protein_coding supercont1.328:752618-753676:1 gene:AAEL008485	29662.3	4.7
5920	630.378	26.24	26.25	94.7818	4876	4463	1440	1378	1743	2017	3335	3521				1290	1293	12	ALGVLAS		PEP_FRAG_1	431	437	b4y4°y7	3	6.0235	6.0235	0.0038	1	3	630.377	1200	1	1	0.2614	26.2828	26.0114	26.2173	26.3282	26.5341	AAEL002956-PA,AAEL011789-PA,AAEL011789-PB	AAEL002956-PA,AAEL011789-PA,AAEL011789-PB	AAEL002956-PA	AAEL002956-PA	AAEL002956-PA	AAEL002956-PA	Probable citrate synthase 1, mitochondrial Precursor (EC 2.3.3.1) protein_coding supercont1.73:53696-90638:-1 gene:AAEL002956	51884.8	9.07
5921	630.378	28.01	28	92.686	1114		2455	2411			1704	1863						1	ALGVLAS		PEP_FRAG_2	431	437	b2b4y5	3	5.5969	6.0235	0.0038	2	3	630.376	1009	1	1	0.2907	28.0046	27.8211	27.9655	28.0433	28.1876	AAEL011789-PA,AAEL002956-PA,AAEL011789-PB	AAEL011789-PA,AAEL002956-PA,AAEL011789-PB	AAEL002956-PA	AAEL002956-PA	AAEL002956-PA	AAEL002956-PA	Probable citrate synthase 1, mitochondrial Precursor (EC 2.3.3.1) protein_coding supercont1.73:53696-90638:-1 gene:AAEL002956	51884.8	9.07
6240	636.323	18.8	18.83	90.9002					2934	3021					2092	5767	5306	13	AFGDVK		PEP_FRAG_2	2	7	b3y4°y6	3	5.2642	5.2642	0.0041	1	2	636.322	7266	1	1	0.2837	18.7604	18.4759	18.6994	18.8198	19.0433	AAEL000951-PB,AAEL000951-PA	AAEL000951-PB,AAEL000951-PA	AAEL000951-PB	AAEL000951-PB	AAEL000951-PB	AAEL000951-PB	elongation factor 1-beta2 protein_coding supercont1.19:3898566-3899796:1 gene:AAEL000951	22339.5	5.58
6347	637.35	25.41	25.4	94.8864					7941	7594			2682	3008	1976	2467	2602	6	YLTVAA		PEP_FRAG_1	297	302	b2b3b3°b4°y3	5	6.3982	6.3982	0.0035	2	2	637.351	5130	1	1	0.1975	25.3605	25.2009	25.3275	25.3957	25.5223	AAEL002848-PA	AAEL002848-PA	AAEL002848-PA	AAEL002848-PA	AAEL002848-PA	AAEL002848-PA	tubulin beta chain protein_coding supercont1.69:2137920-2143622:1 gene:AAEL002848	49350.4	4.6
6512	642.334	35.73	35.71	87.682			2231											3	GAPSTPL		PEP_FRAG_2	218	224	b3y3y7	3	4.4636	4.4636	0.0043	1	2	642.334	2231	1	1	0.3358	35.73	35.5416	35.6908	35.7713	35.9205	AAEL011756-PA	AAEL011756-PA	AAEL011756-PA	AAEL011756-PA	AAEL011756-PA	AAEL011756-PA	aldehyde dehydrogenase protein_coding supercont1.608:532548-540178:1 gene:AAEL011756	58750	6.87
6516	642.353	33.47	33.36	94.105								1029						8	GAPSTPL		PEP_FRAG_2	218	224	b4b4°b6°	3	4.4176	4.4636	0.0043	1	2	642.353	1029	1	1	0.2393	33.4697	33.2375	33.426	33.5277	33.7162	AAEL011756-PA	AAEL011756-PA	AAEL011756-PA	AAEL011756-PA	AAEL011756-PA	AAEL011756-PA	aldehyde dehydrogenase protein_coding supercont1.608:532548-540178:1 gene:AAEL011756	58750	6.87
6653	644.431	23.55	23.58	99.3274	4272	4258	3623	3944			3303	3288				1696	2019	13	GILTLK		PEP_FRAG_1	64	69	b3b4b4°y2y3y4y6	7	8.0139	8.0139	0	1	2	644.43	2031	1	1	0.2068	23.4741	23.2727	23.433	23.5194	23.6797	AAEL001928-PA,AAEL001951-PA,AAEL004616-PA,AAEL004631-PA,AAEL005964-PA,AAEL009451-PA,AAEL011197-PA,AAEL011197-PB,AAEL001673-PA,AAEL005961-PA	AAEL001928-PA,AAEL001951-PA,AAEL004616-PA,AAEL004631-PA,AAEL005964-PA,AAEL009451-PA,AAEL011197-PA,AAEL011197-PB,AAEL001673-PA,AAEL005961-PA
6853	648.406	18.54	18.53	98.866	2516	2030					3581	3404						8	IIFAGK		PEP_FRAG_1	72	77	b2b3y2y3y4y5y6	7	7.2029	7.2029	0	2	2	648.406	4160	1	1	0.2062	18.6676	18.4851	18.6312	18.71	18.8561	AAEL018318-PA	AAEL018318-PA	AAEL018318-PA	AAEL018318-PA	AAEL018318-PA	AAEL018318-PA	hypothetical protein protein_coding supercont1.112:939384-958877:-1 gene:AAEL018318	56196.2	6.18
7014	652.325	24.19	24.22	91.9955	1992	2293					1149	1158						2	GSYNVL		PEP_FRAG_1	1269	1274	b5b6*y5°	3	5.8643	5.8643	0.0038	3	4	652.327	1940	1	1	0.335	24.0467	23.8239	23.9985	24.0927	24.2673	AAEL003655-PA	AAEL003655-PA	AAEL003655-PA	AAEL003655-PA	AAEL003655-PA	AAEL003655-PA	conserved hypothetical protein protein_coding supercont1.94:2210612-2215851:-1 gene:AAEL003655	186327	5.82
7027	652.314	30.39	30.38	90.6615	4449	4915	6733	6687	11058	11575	4453	4189	4542	3718	4762	9888	9850	8	GSYNVL		PEP_FRAG_2	1269	1274	y3y4*y5*y6	4	4.7109	5.8643	0.0038	1	4	652.315	5778	1	1	0.2658	30.5109	30.2658	30.4579	30.5615	30.7536	AAEL003655-PA	AAEL003655-PA	AAEL003655-PA	AAEL003655-PA	AAEL003655-PA	AAEL003655-PA	conserved hypothetical protein protein_coding supercont1.94:2210612-2215851:-1 gene:AAEL003655	186327	5.82
7191	655.377	31.95	31.91	101.533	1273		1387				1782	1827						7	GVNLPGV		PEP_FRAG_1	206	212	y3y5y7	3	5.8461	5.8461	0.0038	2	2	655.376	2076	1	1	0.2474	31.8791	31.6819	31.8405	31.926	32.0846	AAEL014913-PA	AAEL014913-PA	AAEL014913-PA	AAEL014913-PA	AAEL014913-PA	AAEL014913-PA	pyruvate kinase protein_coding supercont1.1334:9859-21417:1 gene:AAEL014913	58084.7	7.13
7206	656.323	20.09	20.09	90.7107		1267					1023	1250						8	DAVAPPS		PEP_FRAG_1	125	131	b3y6°	2	5.22	5.22	0.0043	2	2	656.322	1384	1	1	0.299	20.1345	19.9159	20.0941	20.1902	20.3684	AAEL002841-PA	AAEL002841-PA	AAEL002841-PA	AAEL002841-PA	AAEL002841-PA	AAEL002841-PA	3-hydroxyacyl-coa dehyrogenase protein_coding supercont1.69:185161-206228:1 gene:AAEL002841	33455.8	9.15
7235	656.43	43.2	43.21	99.33	3672	3657	1556	1498			3230	3107						8	VLVNIV		PEP_FRAG_1	157	162	b2b3b4y3	4	6.3815	6.3815	0.0035	2	2	656.43	3888	1	1	0.2253	43.3329	43.1335	43.2878	43.371	43.5253	AAEL008478-PA	AAEL008478-PA	AAEL008478-PA	AAEL008478-PA	AAEL008478-PA	AAEL008478-PA	conserved hypothetical protein protein_coding supercont1.328:731210-734786:1 gene:AAEL008478	35351.2	4.92
7419	660.318	14.07	14.08	90.4842	5037	4725	1777	1818			2140	2145						1	GQLIDD		PEP_FRAG_1	421	426	b3b6°y3y3°y6	5	6.4538	6.4538	0.0029	2	2	660.317	5865	1	1	0.1882	14.0596	13.888	14.0235	14.0966	14.2321	AAEL013899-PA	AAEL013899-PA	AAEL013899-PA	AAEL013899-PA	AAEL013899-PA	AAEL013899-PA	protease m1 zinc metalloprotease protein_coding supercont1.956:316783-326546:-1 gene:AAEL013899	82648.8	5.96
7655	663.37	33.23	33.24	92.317	3913	4098	3101	2424			4250	4475						7	YTLAPV		PEP_FRAG_1	74	79	b2b2°b3b3°b4b4°y2y3	8	6.2786	6.2786	0.0035	5	6	663.371	6091	1	1	0.1374	33.242	33.1131	33.2167	33.2725	33.3761	AAEL004988-PA	AAEL004988-PA	AAEL004988-PA	AAEL004988-PA	AAEL004988-PA	AAEL004988-PA	phosphoglycerate kinase protein_coding supercont1.137:1202078-1205314:1 gene:AAEL004988	44084.6	6.71
7761	665.337	49.11	49.11	96.1405	2590	2353					2235	2330						1	ADLIAY		PEP_FRAG_2	97	102	b3b4	2	6.7786	6.7786	0.0005	1	2	665.335	2169	1	1	0.3471	49.1484	48.8496	49.0882	49.2169	49.4555	AAEL004457-PB,AAEL004457-PA,AAEL004457-PC	AAEL004457-PB,AAEL004457-PA,AAEL004457-PC	AAEL004457-PA	AAEL004457-PA	AAEL004457-PA	AAEL004457-PA	cytochrome c protein_coding supercont1.120:1912200-1912526:-1 gene:AAEL004457	11874.6	9.88
7785	665.385	42.11	42.1	101.995	4479	4547	4165	4359			3569	3586						2	VFLSSI		PEP_FRAG_2	367	372	b3y4	2	5.6964	5.6964	0.0038	2	2	665.385	3844	1	1	0.2303	42.0015	41.7876	41.9553	42.0458	42.2136	AAEL000293-PA	AAEL000293-PA	AAEL000293-PA	AAEL000293-PA	AAEL000293-PA	AAEL000293-PA	ebna2 binding protein P100 protein_coding supercont1.5:4654759-4691495:1 gene:AAEL000293	104005	7.06
8188	674.356	30.78	30.76	94.2421	7844	7256	5921	5846	25979	25416	5211	5132	4710	4674	8927	18571	17241	1	INDLTV		PEP_FRAG_2	503	508	b3*b4b4*b6b6°y6y6*	7	5.2439	5.2439	0.0041	1	2	674.356	8293	1	1	0.1976	30.8056	30.6204	30.7656	30.8439	30.9892	AAEL000293-PA	AAEL000293-PA	AAEL000293-PA	AAEL000293-PA	AAEL000293-PA	AAEL000293-PA	ebna2 binding protein P100 protein_coding supercont1.5:4654759-4691495:1 gene:AAEL000293	104005	7.06
8195	674.37	45.52	45.48	95.7797	1191						1198	1314						8	VADGILS		PEP_FRAG_1	211	217	y3°y6y7	3	5.27	5.27	0.0041	1	2	674.37	1517	1	1	0.3394	45.6099	45.4079	45.5729	45.6618	45.8267	AAEL008006-PA	AAEL008006-PA	AAEL008006-PA	AAEL008006-PA	AAEL008006-PA	AAEL008006-PA	3-hydroxyacyl-coa dehyrogenase protein_coding supercont1.293:893340-900100:1 gene:AAEL008006	35353.9	5.86
8392	677.395	17.29	17.28	101.461	1286	1524					1509	1404						2	NFVLGK		PEP_FRAG_1	221	226	b2y2y3y4y6	5	7.4282	7.4282	0	4	4	677.394	1367	1	1	0.2126	17.2069	16.9941	17.1616	17.2518	17.4193	AAEL001703-PA,AAEL008781-PA	AAEL001703-PA,AAEL008781-PA	AAEL001703-PA	AAEL001703-PA	AAEL001703-PA	AAEL001703-PA	serine-type enodpeptidase, protein_coding supercont1.39:2531968-2532796:1 gene:AAEL001703	27971.2	8
8627	682.313	28.73	28.73	92.8078	2744	2243					1154	1201				1222	1333	1	ASAEFSA		PEP_FRAG_2	189	195	b5°y3°y5y7	4	5.4775	5.4775	0.0038	2	2	682.314	2470	1	1	0.2112	28.7432	28.5328	28.6992	28.7888	28.9551	AAEL003066-PA	AAEL003066-PA	AAEL003066-PA	AAEL003066-PA	AAEL003066-PA	AAEL003066-PA	brain chitinase and chia protein_coding supercont1.76:1946785-2002970:-1 gene:AAEL003066	53115.7	4.77
8758	684.427	41.31	41.29	101.788			1586	1298	6275	5755			6576	6872	1828	3667	4053	13	PLDLVK		PEP_FRAG_1	33	38	b3b4y5y6	4	5.5663	5.5663	0.0038	2	2	684.426	4921	1	1	0.3316	41.2133	41.0183	41.1737	41.2575	41.4129	AAEL011276-PA	AAEL011276-PA	AAEL011276-PA	AAEL011276-PA	AAEL011276-PA	AAEL011276-PA	mitochondrial glutamate carrier protein protein_coding supercont1.562:111453-123360:1 gene:AAEL011276	34340.4	9.95
8884	686.442	19.6	19.64	101.909	1682	1263					1031							1	VVDLIK		PEP_FRAG_1	321	326	b3b4y1y3y4y6	6	7.2795	7.2795	0	2	3	686.442	1645	1	1	0.1905	19.6267	19.4705	19.5963	19.6642	19.79	AAEL016984-PA,AAEL016984-PB	AAEL016984-PA,AAEL016984-PB	AAEL016984-PA	AAEL016984-PA	AAEL016984-PA	AAEL016984-PA	hypothetical protein protein_coding supercont1.157:405434-406432:-1 gene:AAEL016984	35611.8	8.37
9047	688.42	35.21	35.19	99.5462			2594	2543			1644	1594						3	ALTSVVV		PEP_FRAG_1	128	134	b2b4°b5b5°	4	5.747	5.747	0.0038	3	3	688.421	2151	1	1	0.1916	35.211	35.0224	35.1733	35.2546	35.4055	AAEL013320-PA	AAEL013320-PA	AAEL013320-PA	AAEL013320-PA	AAEL013320-PA	AAEL013320-PA	translocon-associated protein, delta subunit protein_coding supercont1.822:427145-427923:1 gene:AAEL013320	18385.1	9.43
9214	690.413	24.18	24.19	101.2	15347	14143	10077	8923	34482	30031	6484	7406	7431	7463	17262	31010	27409	13	LTSTLR		PEP_FRAG_1	7	12	b2b3b3°b4b4°b5°b6b6°y1y3y6	11	6.4645	6.4645	0.0029	4	4	690.412	54798	1	1	0.1788	24.1078	23.9345	24.0719	24.146	24.2834	AAEL005435-PA,AAEL005435-PB	AAEL005435-PA,AAEL005435-PB	AAEL005435-PA	AAEL005435-PA	AAEL005435-PA	AAEL005435-PA	mitochondrial processing peptidase beta subunit protein_coding supercont1.156:1726989-1729306:1 gene:AAEL005435	52876.8	5.82
9250	692.355	23.57	23.63	99.189													1160	13	FGVAGNK		PEP_FRAG_2	612	618	y3*y6*y7	3	5.5704	5.6892	0.0038	1	2	692.355	1160	1	1	0.259	23.5659	23.4057	23.5331	23.6018	23.7292	AAEL015458-PA	AAEL015458-PA	AAEL015458-PA	AAEL015458-PA	AAEL015458-PA	AAEL015458-PA	transferrin protein_coding supercont1.2392:8172-10138:-1 gene:AAEL015458	71701.3	7.43
9251	692.371	20.39	20.39	95.5288	2755	2439	1298				3922	3986						2	FGVAGNK		PEP_FRAG_1	612	618	b4y3*y4y5*y7	5	5.6892	5.6892	0.0038	1	2	692.37	2128	1	1	0.2737	20.2556	20.0303	20.2097	20.3064	20.4858	AAEL015458-PA	AAEL015458-PA	AAEL015458-PA	AAEL015458-PA	AAEL015458-PA	AAEL015458-PA	transferrin protein_coding supercont1.2392:8172-10138:-1 gene:AAEL015458	71701.3	7.43
9280	692.338	21.46	21.47	99.0233	6585	6279	20487	19135	9797	9187	12319	13245	19485	20951	2791	6141	6073	9	GMVTER		PEP_FRAG_1	379	384	b3b6y1y3y4y6	6	6.692	6.692	0.0009	7	7	692.338	12316	1	1	0.3529	21.6509	21.4714	21.6133	21.6898	21.8317	AAEL001577-PA	AAEL001577-PA	AAEL001577-PA	AAEL001577-PA	AAEL001577-PA	AAEL001577-PA	conserved hypothetical protein protein_coding supercont1.36:1592900-1606012:1 gene:AAEL001577	98149	4.65
9580	700.329	34.06	33.96	97.825								1197						8	TSFFQA		PEP_FRAG_1	135	140	b3°b5b6y2y2*y3*	6	5.9755	5.9755	0.0038	1	2	700.329	1197	1	1	0.2283	34.0618	33.8269	34.0067	34.1036	34.2834	AAEL010821-PA	AAEL010821-PA	AAEL010821-PA	AAEL010821-PA	AAEL010821-PA	AAEL010821-PA	60S acidic ribosomal protein P0 protein_coding supercont1.510:444590-445799:1 gene:AAEL010821	33890	5.3
9708	702.366	15.95	15.97	102.466					2637	2449					2723	3671	4183	13	TDEIPK		PEP_FRAG_1	295	300	b2°b3b3°b4y2y3y6	7	6.4836	6.4836	0.0023	2	2	702.365	5209	1	1	0.248	15.9241	15.7311	15.8847	15.9675	16.121	AAEL004500-PA,AAEL004500-PB	AAEL004500-PA,AAEL004500-PB	AAEL004500-PA	AAEL004500-PA	AAEL004500-PA	AAEL004500-PA	eukaryotic translation elongation factor protein_coding supercont1.121:1852844-1861602:-1 gene:AAEL004500	95362.5	5.95
9723	702.401	39.35	39.35	100.69	4898	5222	3904	4109			3878	4071						7	LGDVVSI		PEP_FRAG_1	93	99	b3b4b5b5°b6°	5	6.2098	6.2098	0.0035	6	6	702.401	5410	1	1	0.2558	39.3535	39.1851	39.317	39.3881	39.52	AAEL010585-PA,AAEL012364-PA	AAEL010585-PA,AAEL012364-PA	AAEL012364-PA	AAEL012364-PA	AAEL012364-PA	AAEL012364-PA	spermatogenesis associated factor protein_coding supercont1.684:596432-616016:1 gene:AAEL012364	80339.7	5.29
9957	705.453	61.97	61.93	107.158	4533	4394	3189	3123			3598	3944						8	ILFVTI		PEP_FRAG_1	288	293	b2b3b4b5°y2y3y4°	7	6.6849	6.6849	0.0009	3	3	705.452	5453	1	1	0.2309	62.0944	61.9061	62.0564	62.1375	62.2879	AAEL000641-PB,AAEL000641-PA	AAEL000641-PB,AAEL000641-PA	AAEL000641-PA	AAEL000641-PA	AAEL000641-PA	AAEL000641-PA	protein disulfide isomerase protein_coding supercont1.13:668270-683719:-1 gene:AAEL000641	56295.7	4.76
10155	709.348	28.38	28.4	102.549	3806	3381	1663	1610			3407	3320						7	PDPPVAN		PEP_FRAG_1	659	665	b5b5°b7*y5*y7y7*	6	6.3309	6.3309	0.0035	2	2	709.349	4553	1	1	0.2615	28.402	28.2105	28.3643	28.4472	28.601	AAEL004699-PA	AAEL004699-PA	AAEL004699-PA	AAEL004699-PA	AAEL004699-PA	AAEL004699-PA	conserved hypothetical protein protein_coding supercont1.127:1365270-1373241:1 gene:AAEL004699	112379	9.9
10377	714.345	36.42	36.42	103.704	12242	12937	6069	5815		4017	20005	21567				2403	2568	7	TLYGFGG		PEP_FRAG_1	97	103	b2b3b4b4°b5y3y4y5	8	7.6648	7.6648	0	7	7	714.344	39418	1	1	0.3263	36.4307	36.2388	36.3909	36.4729	36.625	AAEL000490-PA,AAEL000501-PA,AAEL000517-PA,AAEL003673-PA,AAEL003689-PA,AAEL003823-PA,AAEL003833-PA,AAEL003846-PA,AAEL003863-PA,AAEL011999-PA,AAEL013709-PA,AAEL000513-PA,AAEL003814-PA,AAEL003838-PA,AAEL003866-PA	AAEL000490-PA,AAEL000501-PA,AAEL000517-PA,AAEL003673-PA,AAEL003689-PA,AAEL003823-PA,AAEL003833-PA,AAEL003846-PA,AAEL003863-PA,AAEL011999-PA,AAEL013709-PA,AAEL000513-PA,AAEL003814-PA,AAEL003838-PA,AAEL003866-PA	AAEL000490-PA	AAEL000490-PA	AAEL000490-PA	AAEL000490-PA	histone H4 protein_coding supercont1.9:3668611-3668922:1 gene:AAEL000490	11381.4	11.77
10503	716.361	40.95	40.93	101.532	3205	2940	3693	3315	14336	12138	3945	4235	3198	2818	6447	12303	12564	8	NLNAVW		PEP_FRAG_2	155	160	b3*y2y4y6*	4	5.3841	5.4907	0.0038	1	2	716.36	5923	1	1	0.3142	40.9878	40.696	40.9274	41.0522	41.2835	AAEL009658-PA,AAEL009658-PB,AAEL009658-PC	AAEL009658-PA,AAEL009658-PB,AAEL009658-PC	AAEL009658-PB	AAEL009658-PB	AAEL009658-PB	AAEL009658-PB	alpha,alpha-trehalase protein_coding supercont1.416:220712-250040:-1 gene:AAEL009658	67353.2	4.99
10547	717.376	19.08	19.12	98.923		1166			6897	7685					1536	2464	2911	2	GVDQSVL		PEP_FRAG_2	573	579	b6y6°y7	3	4.7491	5.2608	0.0041	1	2	717.374	1028	1	1	0.3235	19.083	18.9365	19.0553	19.1194	19.2382	AAEL008607-PA	AAEL008607-PA	AAEL008607-PA	AAEL008607-PA	AAEL008607-PA	AAEL008607-PA	tep3 protein_coding supercont1.334:522557-599936:-1 gene:AAEL008607	163616	5.44
10565	717.384	46.56	46.62	104.469				1156										4	GVDQSVL		PEP_FRAG_2	573	579	b4b5°b6y7y7*	5	5.2608	5.2608	0.0041	1	2	717.384	1156	1	1	0.3805	46.5571	46.327	46.5119	46.6116	46.7965	AAEL008607-PA	AAEL008607-PA	AAEL008607-PA	AAEL008607-PA	AAEL008607-PA	AAEL008607-PA	tep3 protein_coding supercont1.334:522557-599936:-1 gene:AAEL008607	163616	5.44
10635	716.375	24.96	24.96	104.573							1055							7	NLNAVW		PEP_FRAG_2	155	160	b4*b5b6*y6	4	5.4907	5.4907	0.0038	1	2	716.375	1055	1	1	0.2781	24.9618	24.681	24.9001	25.0182	25.2373	AAEL009658-PA,AAEL009658-PC,AAEL009658-PB	AAEL009658-PA,AAEL009658-PC,AAEL009658-PB	AAEL009658-PB	AAEL009658-PB	AAEL009658-PB	AAEL009658-PB	alpha,alpha-trehalase protein_coding supercont1.416:220712-250040:-1 gene:AAEL009658	67353.2	4.99
10749	720.429	22.02	22.04	106.093	1935	1993					1237	1156						1	AILFEK		PEP_FRAG_1	445	450	b2b3y2°y3y4y6	6	6.7876	6.7876	0.0005	3	3	720.429	1850	1	1	0.193	22.0324	21.8405	21.9891	22.0692	22.2178	AAEL015458-PA	AAEL015458-PA	AAEL015458-PA	AAEL015458-PA	AAEL015458-PA	AAEL015458-PA	transferrin protein_coding supercont1.2392:8172-10138:-1 gene:AAEL015458	71701.3	7.43
10835	722.407	10.3	10.44	102.667	9982	9328	4191	3861			7531	7636				1167	1432	8	EVYLAK		PEP_FRAG_1	69	74	b2b3b3°b4y2y3y4y6	8	7.8754	7.8754	0	5	5	722.407	11295	1	1	0.2618	10.5161	10.276	10.4644	10.5659	10.7543	AAEL013775-PA	AAEL013775-PA	AAEL013775-PA	AAEL013775-PA	AAEL013775-PA	AAEL013775-PA	conserved hypothetical protein protein_coding supercont1.918:67299-68208:-1 gene:AAEL013775	31656.2	4.71
10873	723.365	13.35	13.38	103.935	2071	1907	3275	2877	2117	1895	2868	2944				3269	3364	6	VTNDFK		PEP_FRAG_1	285	290	b4y4y6y6*	4	6.0191	6.0191	0.0038	2	2	723.365	1012	1	1	0.2129	13.2648	13.052	13.2197	13.3101	13.4778	AAEL006417-PA	AAEL006417-PA	AAEL006417-PA	AAEL006417-PA	AAEL006417-PA	AAEL006417-PA	D7 protein, putative protein_coding supercont1.204:322860-324089:1 gene:AAEL006417	39198.1	9.55
10893	723.377	25.01	25.02	103.85	8993	8632	10550	10732	35243	37620	11387	10748	8168	8416	16566	34725	30570	13	YTLGNR		PEP_FRAG_1	67	72	b2b2°b3°b4b5b6*y1y2y2*y3*y4y4*y5y5*y5°y6y6*	17	8.0759	8.0759	0	6	9	723.377	62548	1	1	0.3138	24.9645	24.7887	24.9274	25.0022	25.1409	AAEL009985-PA,AAEL013885-PA	AAEL009985-PA,AAEL013885-PA	AAEL013885-PA	AAEL013885-PA	AAEL013885-PA	AAEL013885-PA	conserved hypothetical protein protein_coding supercont1.953:285273-285815:-1 gene:AAEL013885	17155.3	4.61
11261	729.448	46.99	47.07	107.608													1753	13	LIGQIVS		PEP_FRAG_1	230	236	b3y6y7	3	6.6633	7.0911	0	1	9	729.448	1753	1	1	0.1992	46.9933	46.811	46.9516	47.0275	47.1681	AAEL013229-PA,AAEL006642-PA,AAEL012101-PA	AAEL013229-PA,AAEL006642-PA,AAEL012101-PA
11262	729.448	32.92	32.9	106.028	3690	3892	6189	6475	4898	4791	6438	5802						7	LIGQIVS		PEP_FRAG_1	230	236	b2b3b4b5b6b6*y3	7	7.0911	7.0911	0	7	9	729.449	10399	1	1	0.1737	32.9061	32.752	32.8737	32.9394	33.0611	AAEL013229-PA,AAEL006642-PA,AAEL012101-PA	AAEL013229-PA,AAEL006642-PA,AAEL012101-PA
11337	731.377	43.14	43.14	43.3235	2941	2921		1337				2683						8	GADSLVAV		PEP_FRAG_2	273	280	b4b4°b7b8	4	5.485	5.485	0.0038	2	4	731.378	3129	1.5	2	0.2721	43.2216	43.0379	43.1813	43.2585	43.4018	AAEL008620-PA	AAEL008620-PA	AAEL008620-PA	AAEL008620-PA	AAEL008620-PA	AAEL008620-PA	D7 protein, putative protein_coding supercont1.336:1106349-1107354:-1 gene:AAEL008620	35780.9	5.04
11372	731.402	48.3	48.26	104.576	1302						1107	1102						1	GADSLVAV		PEP_FRAG_2	273	280	b5y6	2	4.9745	5.485	0.0038	1	4	731.4	1093	1	1	0.1879	48.3112	48.0865	48.2345	48.3143	48.4623	AAEL008620-PA	AAEL008620-PA	AAEL008620-PA	AAEL008620-PA	AAEL008620-PA	AAEL008620-PA	D7 protein, putative protein_coding supercont1.336:1106349-1107354:-1 gene:AAEL008620	35780.9	5.04
11473	733.366	25.24	25.27	102.893	3450	3276	2748	2563			2591	2725						7	QMLGER		PEP_FRAG_2	564	569	b3*y3°y4°y5°y6y6*	6	5.2106	5.2106	0.0043	2	2	733.369	3032	1	1	0.354	25.2673	25.0501	25.219	25.31	25.4789	AAEL010318-PA,AAEL010318-PB	AAEL010318-PA,AAEL010318-PB	AAEL010318-PA	AAEL010318-PA	AAEL010318-PA	AAEL010318-PA	polyadenylate-binding protein protein_coding supercont1.470:99475-108194:-1 gene:AAEL010318	69894.7	9.78
11533	734.381	10.69	10.84	103.558	2234	2792	2106	2619										1	VFPTDR		PEP_FRAG_2	421	426	b5y3y4y6	4	6.9017	6.9017	0.0005	2	2	734.381	2364	1	1	0.3131	10.7076	10.3981	10.6447	10.7776	11.0242	AAEL000859-PA	AAEL000859-PA	AAEL000859-PA	AAEL000859-PA	AAEL000859-PA	AAEL000859-PA	hypothetical protein protein_coding supercont1.18:904324-913065:-1 gene:AAEL000859	60718.8	4.83
11534	734.374	16.11	16.11	107.892		2353												2	VVEEMK		PEP_FRAG_1	212	217	b2b3b4y2y3°y4y4°y5°y6	9	7.0509	7.629	0	1	3	734.374	2353	1	1	0.2055	16.1093	15.905	16.0669	16.1542	16.3161	AAEL000647-PA,AAEL000678-PA	AAEL000647-PA,AAEL000678-PA
11535	734.374	16.08	16.09	107.463	3049													1	VVEEMK		PEP_FRAG_1	212	217	b2b3b4y1y2y3y3°y4y4°y5y6	11	7.629	7.629	0	1	3	734.374	3049	1	1	0.1896	16.0821	15.909	16.0469	16.1212	16.259	AAEL000647-PA,AAEL000678-PA	AAEL000647-PA,AAEL000678-PA
11653	736.362	31.09	31.06	102.214	2530													1	NIGSAFQ		PEP_FRAG_1	463	469	b5*b7y2*y5	4	5.4503	5.4503	0.0038	1	2	736.362	2530	1	1	0.2777	31.0863	30.8042	31.0229	31.1409	31.3596	AAEL011756-PA	AAEL011756-PA	AAEL011756-PA	AAEL011756-PA	AAEL011756-PA	AAEL011756-PA	aldehyde dehydrogenase protein_coding supercont1.608:532548-540178:1 gene:AAEL011756	58750	6.87
11654	736.362	30.89	31.07	102.52		2040												2	NIGSAFQ		PEP_FRAG_1	463	469	b5*b6b7y4*y4°y6y7	7	5.2107	5.4503	0.0038	1	2	736.362	2040	1	1	0.2369	30.8935	30.6563	30.8429	30.9435	31.1301	AAEL011756-PA	AAEL011756-PA	AAEL011756-PA	AAEL011756-PA	AAEL011756-PA	AAEL011756-PA	aldehyde dehydrogenase protein_coding supercont1.608:532548-540178:1 gene:AAEL011756	58750	6.87
11771	738.365	28.67	28.68	103.856	4288	4613	1384	1582			3229	3153						2	QYTVLD		PEP_FRAG_1	195	200	b3*b4	2	7.0351	7.0351	0	1	2	738.366	4023	1	1	0.3501	28.5394	28.3561	28.501	28.5791	28.7241	AAEL006424-PA	AAEL006424-PA	AAEL006424-PA	AAEL006424-PA	AAEL006424-PA	AAEL006424-PA	37 kDa salivary gland allergen Aed a 2 Precursor (Protein D7)(Allergen Aed a 2) protein_coding supercont1.204:345910-347111:-1 gene:AAEL006424	37465.4	7.72
11776	738.365	49.75	49.73	102.41	5897	4673	7315	7537			3234	3251						7	QYTVLD		PEP_FRAG_2	195	200	b4°y4°	2	6.1156	7.0351	0	1	2	738.367	4240	1	1	0.2339	49.7556	49.5256	49.7071	49.8049	49.9864	AAEL006424-PA	AAEL006424-PA	AAEL006424-PA	AAEL006424-PA	AAEL006424-PA	AAEL006424-PA	37 kDa salivary gland allergen Aed a 2 Precursor (Protein D7)(Allergen Aed a 2) protein_coding supercont1.204:345910-347111:-1 gene:AAEL006424	37465.4	7.72
11900	740.428	35.71	35.71	105.365	3753	3411	7287	7323			4549	4423						4	INVANLP		PEP_FRAG_1	31	37	b3b4y3y3*y5y6*y7	7	6.0997	6.0997	0.0036	1	2	740.428	6890	1	1	0.1844	35.6905	35.5103	35.6527	35.7294	35.8718	AAEL004699-PB,AAEL004699-PA	AAEL004699-PB,AAEL004699-PA	AAEL004699-PA	AAEL004699-PA	AAEL004699-PA	AAEL004699-PA	conserved hypothetical protein protein_coding supercont1.127:1365270-1373241:1 gene:AAEL004699	112379	9.9
11903	740.433	43.02	42.99	110.538	3123	2987	3867	3879	4122	3834	6384	6166	2799	2785		4423	4813	1	INVANLP		PEP_FRAG_2	31	37	b3*b5*b6y4*y5	5	5.665	6.0997	0.0036	1	2	740.432	2655	1	1	0.3233	43.0209	42.7805	42.9702	43.0725	43.2622	AAEL004699-PB,AAEL004699-PA	AAEL004699-PB,AAEL004699-PA	AAEL004699-PA	AAEL004699-PA	AAEL004699-PA	AAEL004699-PA	conserved hypothetical protein protein_coding supercont1.127:1365270-1373241:1 gene:AAEL004699	112379	9.9
11930	741.356	50	49.99	103.242	6039	5759	3669	3657			2743	2701						7	GNGFSFI		PEP_FRAG_1	105	111	b2b3b5*b5°b6*y2y3	7	6.1715	6.1715	0.0035	3	3	741.356	3324	1	1	0.2221	50.0043	49.7929	49.958	50.047	50.212	AAEL005428-PA	AAEL005428-PA	AAEL005428-PA	AAEL005428-PA	AAEL005428-PA	AAEL005428-PA	conserved hypothetical protein protein_coding supercont1.155:26336-27164:1 gene:AAEL005428	12970.1	10.08
12053	743.44	20.74	20.72	107.741									21329	22323	16608	26247		12	AGIDIVR		PEP_FRAG_1	460	466	b5°b6°b7y7	4	5.1257	5.1257	0.0043	1	2	743.44	37535	1	1	0.227	20.7388	20.512	20.6908	20.7872	20.9661	AAEL011584-PA	AAEL011584-PA	AAEL011584-PA	AAEL011584-PA	AAEL011584-PA	AAEL011584-PA	chaperonin-60kD, ch60 protein_coding supercont1.591:670682-691994:1 gene:AAEL011584	61193.1	5.3
12064	743.44	38.77	38.74	112.609		1266	2406	2202	12615	13507	3840	3923	6989	6998	5936	7382	7314	13	DGIARIV		MISSING_CLEAVAGE	47	53	b4b4°b6°b7y4y7	6	5.987	5.987		1	1	743.44	11132	1	1	0.2171	38.72	38.5234	38.6779	38.7612	38.9158
12230	745.407	45.9	45.92	107.201			1829	2000								1410	1318	3	DGTIALVG		PEP_FRAG_2	190	197	b4°b6°y6y8	4	5.1247	5.2705	0.0041	1	3	745.406	1483	1	1	0.2659	45.93	45.666	45.8755	45.9884	46.1979	AAEL009142-PA	AAEL009142-PA	AAEL009142-PA	AAEL009142-PA	AAEL009142-PA	AAEL009142-PA	prolyl endopeptidase (prolyl oligopeptidase) protein_coding supercont1.372:743438-766744:1 gene:AAEL009142	88871.4	6.24
12237	745.418	50.74	50.74	102.579	4091	3245	13421	11844	2205		17607	17564			1600		1751	2	DGTIALVG		PEP_FRAG_2	190	197	b4°y7°	2	4.4027	5.2705	0.0041	1	3	745.417	2588	1	1	0.3006	50.7592	50.4944	50.7031	50.8156	51.0243	AAEL009142-PA	AAEL009142-PA	AAEL009142-PA	AAEL009142-PA	AAEL009142-PA	AAEL009142-PA	prolyl endopeptidase (prolyl oligopeptidase) protein_coding supercont1.372:743438-766744:1 gene:AAEL009142	88871.4	6.24
12305	747.367	16.53	16.52	107.492	2053	2245					2296	2271						7	ISGWTSP		PEP_FRAG_1	258	264	b6y6	2	6.7338	6.7338	0.0009	1	2	747.367	2579	1	1	0.2817	16.5265	16.3508	16.4898	16.5647	16.7037	AAEL003734-PA	AAEL003734-PA	AAEL003734-PA	AAEL003734-PA	AAEL003734-PA	AAEL003734-PA	aconitase, mitochondrial protein_coding supercont1.95:2766128-2774361:-1 gene:AAEL003734	88189.3	8.47
12434	749.416	35.2	35.2	108.451	2227	1963	5132	4577			1316	1590						3	IFDNLK		PEP_FRAG_1	781	786	b4y4°y5y5°y6	5	6.8688	7.2329	0	2	6	749.417	4781	1.17	1	0.2289	35.2275	35.0344	35.1874	35.2698	35.4228	AAEL012062-PA,AAEL012062-PB	AAEL012062-PA,AAEL012062-PB	AAEL012062-PB	AAEL012062-PB	AAEL012062-PB	AAEL012062-PB	Na /K ATPase alpha subunit protein_coding supercont1.650:473391-547252:1 gene:AAEL012062	115852	5.34
12435	749.417	36.86	36.83	110.346	1329		3418	2915	2317	1939			3321	2767		1280	1929	13	IFDNLK		PEP_FRAG_1	781	786	b3b4b4*y3y3*y4y5y6	8	7.2329	7.2329	0	4	6	749.416	1903	1	1	0.2442	36.7503	36.5036	36.696	36.7997	36.9921	AAEL012062-PA,AAEL012062-PB	AAEL012062-PA,AAEL012062-PB	AAEL012062-PB	AAEL012062-PB	AAEL012062-PB	AAEL012062-PB	Na /K ATPase alpha subunit protein_coding supercont1.650:473391-547252:1 gene:AAEL012062	115852	5.34
12443	749.428	35.93	35.93	107.074	2299	2141	1782	1632	3289	3029	1652	1855			1568	3136	3460	5	LGGTVFR		PEP_FRAG_2	103	109	b5°b7y1y6y7	5	5.1475	5.1475	0.0038	2	2	749.428	1955	1	1	0.203	36.1472	35.952	36.1049	36.1874	36.3403	AAEL000746-PA,AAEL012614-PA	AAEL000746-PA,AAEL012614-PA
12476	750.402	52.31	52.29	107.177	2254	2055					1143	1380						7	GDVILAY		PEP_FRAG_2	368	374	b4b6	2	5.0201	5.0504	0.0043	1	2	750.402	1336	1	1	0.2512	52.2825	52.0679	52.236	52.3266	52.4947	AAEL014110-PA	AAEL014110-PA	AAEL014110-PA	AAEL014110-PA	AAEL014110-PA	AAEL014110-PA	sulfite reductase protein_coding supercont1.1008:302286-315277:1 gene:AAEL014110	63692	7.13
12503	751.367	18.6	18.59	109.72												1703		12	STDGLMK		PEP_FRAG_1	455	461	b4b4°b5y2y5y7	6	6.4992	6.4992	0.0023	1	2	751.367	1703	1	1	0.282	18.5996	18.4062	18.5593	18.6419	18.795	AAEL011789-PA,AAEL011789-PB,AAEL002956-PA	AAEL011789-PA,AAEL011789-PB,AAEL002956-PA	AAEL002956-PA	AAEL002956-PA	AAEL002956-PA	AAEL002956-PA	Probable citrate synthase 1, mitochondrial Precursor (EC 2.3.3.1) protein_coding supercont1.73:53696-90638:-1 gene:AAEL002956	51884.8	9.07
12535	751.372	42.74	42.72	105.388	2482	2757	1400				1384	1331						7	GGMQIFV		PEP_FRAG_2	75	81	b5*y5*y7	3	6.3278	6.3278	0.0035	1	3	751.373	1623	1	1	0.3128	42.733	42.5238	42.6895	42.7789	42.9446	AAEL003877-PA,AAEL003877-PB,AAEL000795-PA	AAEL003877-PA,AAEL003877-PB,AAEL000795-PA	AAEL000795-PA	AAEL000795-PA	AAEL000795-PA	AAEL000795-PA	ubiquitin protein_coding supercont1.17:1408260-1409177:1 gene:AAEL000795	34319.5	7.74
12550	751.373	60.19	60.17	105.374	14903	14206	8208	7392			8185	6827						1	GGMQIFV		PEP_FRAG_2	75	81	y4*y6*y7y7*	4	5.2073	6.3278	0.0035	1	3	751.372	16012	1	1	0.45	60.2089	60.0002	60.1651	60.254	60.4189	AAEL003877-PA,AAEL003877-PB,AAEL000795-PA	AAEL003877-PA,AAEL003877-PB,AAEL000795-PA	AAEL000795-PA	AAEL000795-PA	AAEL000795-PA	AAEL000795-PA	ubiquitin protein_coding supercont1.17:1408260-1409177:1 gene:AAEL000795	34319.5	7.74
12812	757.456	21.45	21.47	112.777	2789	2526	2118	2241			2132	1779						7	ILEGLGR		PEP_FRAG_1	78	84	b4y1y4y7	4	6.5919	6.5919	0.002	2	2	757.457	2458	1	1	0.2532	21.4562	21.2955	21.421	21.4886	21.614	AAEL006485-PA,AAEL006485-PC,AAEL006485-PB	AAEL006485-PA,AAEL006485-PC,AAEL006485-PB	AAEL006485-PA	AAEL006485-PA	AAEL006485-PA	AAEL006485-PA	inosine-uridine preferring nucleoside hydrolase protein_coding supercont1.208:816972-818047:-1 gene:AAEL006485	38220.9	4.74
12983	759.406	65.54	65.52	109.228	13033	11599	8787	8066	9452	8784	8885	8463	3945	3096	9593		8693	2	ILGYFF		PEP_FRAG_1	125	130	b2b3b4y2	4	6.3025	6.3025	0.0035	5	5	759.406	12034	1	1	0.2283	65.4396	65.2362	65.3963	65.4825	65.6426	AAEL009151-PA,AAEL009151-PB	AAEL009151-PA,AAEL009151-PB	AAEL009151-PA	AAEL009151-PA	AAEL009151-PA	AAEL009151-PA	40S ribosomal protein S8 protein_coding supercont1.373:398773-416256:-1 gene:AAEL009151	14829.4	10.41
13031	760.419	45.39	45.38	108.956	4499	4513	6988	6851	2501	2326	6820	6637						5	DIFPLR		PEP_FRAG_2	677	682	b4b5	2	4.8848	5.5034	0.0038	1	3	760.417	1451	1	1	0.2521	45.5449	45.315	45.5055	45.6082	45.7987	AAEL011551-PA	AAEL011551-PA	AAEL011551-PA	AAEL011551-PA	AAEL011551-PA	AAEL011551-PA	conserved hypothetical protein protein_coding supercont1.589:374679-400558:-1 gene:AAEL011551	99967.1	5.42
13040	760.417	39.6	39.56	109.438			1625	1649	4417	4705	1775	1364	4721	5316	4855	10832	11354	12	DIFPLR		PEP_FRAG_2	677	682	b4b4°b5b5°y6	5	5.5034	5.5034	0.0038	2	3	760.418	13603	1.03	1	0.3394	39.6242	39.3809	39.5723	39.6754	39.8668	AAEL011551-PA	AAEL011551-PA	AAEL011551-PA	AAEL011551-PA	AAEL011551-PA	AAEL011551-PA	conserved hypothetical protein protein_coding supercont1.589:374679-400558:-1 gene:AAEL011551	99967.1	5.42
13044	761.341	21.5	21.52	105.893	2142	1970	2124	1393			2241	1653						1	AAVPMSEG		PEP_FRAG_2	463	470	y5y7y8	3	4.9289	4.9289	0.0043	1	2	761.343	2058	1.21	1	0.2651	21.5243	21.3136	21.4854	21.578	21.7498	AAEL015070-PA	AAEL015070-PA	AAEL015070-PA	AAEL015070-PA	AAEL015070-PA	AAEL015070-PA	alkaline phosphatase protein_coding supercont1.1446:21418-70765:-1 gene:AAEL015070	58629.8	5.78
13056	761.352	38.57	38.56	111.691	18388	18321	7242	7337	2749	2282	33303	34457						3	AAVPMSEG		PEP_FRAG_2	463	470	b6°b7°	2	4.6614	4.9289	0.0043	1	2	761.351	7418	1	1	0.3305	38.5766	38.3372	38.5262	38.6282	38.8172	AAEL015070-PA	AAEL015070-PA	AAEL015070-PA	AAEL015070-PA	AAEL015070-PA	AAEL015070-PA	alkaline phosphatase protein_coding supercont1.1446:21418-70765:-1 gene:AAEL015070	58629.8	5.78
13069	761.382	57.05	57.02	107.528	2686	2615	6443	5979	2400	2797	3436	3445						4	DTGLWGI		PEP_FRAG_1	343	349	b2b3b3°b4b5b6	6	6.025	6.025	0.0038	5	5	761.379	5282	1	1	0.2812	57.0255	56.8071	56.9756	57.0664	57.2349	AAEL005435-PA,AAEL005435-PB	AAEL005435-PA,AAEL005435-PB	AAEL005435-PA	AAEL005435-PA	AAEL005435-PA	AAEL005435-PA	mitochondrial processing peptidase beta subunit protein_coding supercont1.156:1726989-1729306:1 gene:AAEL005435	52876.8	5.82
13080	761.432	24.7	24.71	110.602	14386	15914	7938	7628	1843	1783	10648	10790						7	SCLLLR	Carbamidomethyl C(2)	PEP_FRAG_1	27	32	b3b3°b4b4°b6y6	6	6.1503	6.1503	0.0038	3	4	761.432	19082	1	1	0.238	24.7144	24.5329	24.6769	24.7545	24.8985	AAEL005069-PA	AAEL005069-PA	AAEL005069-PA	AAEL005069-PA	AAEL005069-PA	AAEL005069-PA	ras-related protein Rab-1A, putative protein_coding supercont1.140:1254787-1287095:1 gene:AAEL005069	23150.1	4.98
13081	761.431	35.79	35.79	110.663	6786	7053	4002	3823			5959	5815						3	SCLLLR	Carbamidomethyl C(2)	PEP_FRAG_1	27	32	b3b3°b4°b6°y2y6	6	5.0805	6.1503	0.0038	1	4	761.432	3435	1	1	0.2611	35.8087	35.6053	35.7676	35.8551	36.0174	AAEL005069-PA	AAEL005069-PA	AAEL005069-PA	AAEL005069-PA	AAEL005069-PA	AAEL005069-PA	ras-related protein Rab-1A, putative protein_coding supercont1.140:1254787-1287095:1 gene:AAEL005069	23150.1	4.98
13118	762.413	33.24	33.19	108.556			1443				2485	2755						3	DVPLYR		PEP_FRAG_1	86	91	b3b5°	2	5.5588	7.2381	0	1	5	762.412	1195	1	1	0.2253	33.1988	32.9768	33.1521	33.2467	33.4221	AAEL006485-PA,AAEL006485-PB,AAEL006485-PC	AAEL006485-PA,AAEL006485-PB,AAEL006485-PC	AAEL006485-PA	AAEL006485-PA	AAEL006485-PA	AAEL006485-PA	inosine-uridine preferring nucleoside hydrolase protein_coding supercont1.208:816972-818047:-1 gene:AAEL006485	38220.9	4.74
13122	762.413	19.72	19.74	108.727	4616	4713	1887	1841			2999	2984						1	DVPLYR		PEP_FRAG_1	86	91	b3y4y5y6	4	7.2381	7.2381	0	4	5	762.412	4993	1	1	0.1755	19.7364	19.5802	19.7044	19.7714	19.8956	AAEL006485-PB,AAEL006485-PC,AAEL006485-PA	AAEL006485-PB,AAEL006485-PC,AAEL006485-PA	AAEL006485-PA	AAEL006485-PA	AAEL006485-PA	AAEL006485-PA	inosine-uridine preferring nucleoside hydrolase protein_coding supercont1.208:816972-818047:-1 gene:AAEL006485	38220.9	4.74
13232	764.356	21.12	21.13	111.144	2141	2302	1516	1544			1889	1756						3	TFDEPR		PEP_FRAG_1	157	162	b3y3y4y6	4	6.2403	6.2403	0.0035	2	2	764.355	1252	1	1	0.206	21.1353	20.9257	21.088	21.1755	21.3377	AAEL007549-PA,AAEL012666-PA	AAEL007549-PA,AAEL012666-PA	AAEL007549-PA	AAEL007549-PA	AAEL007549-PA	AAEL007549-PA	phosphatidylethanolamine-binding protein protein_coding supercont1.262:1556897-1557532:-1 gene:AAEL007549	23327.3	7.3
13244	764.367	22.64	22.67	106.016	3523	3466	2979	2323			3268	3726						7	LDEYPK		PEP_FRAG_2	21	26	b4y4	2	5.0474	5.0474	0.0038	1	2	764.368	4236	1	1	0.2338	22.6826	22.4832	22.6406	22.7255	22.8829	AAEL010821-PA	AAEL010821-PA	AAEL010821-PA	AAEL010821-PA	AAEL010821-PA	AAEL010821-PA	60S acidic ribosomal protein P0 protein_coding supercont1.510:444590-445799:1 gene:AAEL010821	33890	5.3
13262	764.418	32.08	32.09	113.601	8638	9552	7231	6998			4075	4080						2	LDELFK		PEP_FRAG_1	553	558	b2b3b4y2y5y6	6	6.5761	6.5761	0.002	1	3	764.419	9355	1	1	0.2344	31.9165	31.7323	31.8778	31.9562	32.1017	AAEL007201-PA	AAEL007201-PA	AAEL007201-PA	AAEL007201-PA	AAEL007201-PA	AAEL007201-PA	glutamyl aminopeptidase protein_coding supercont1.243:1008299-1026342:1 gene:AAEL007201	114155	5.84
13271	764.417	41.17	41.19	109.545	27197	27695	18103	18590	9664	9704	12232	12136			1941	3374	3571	12	LDELFK		PEP_FRAG_1	553	558	b3b3°y2y3y6	5	5.1135	6.5761	0.002	1	3	764.417	3135	1	1	0.295	41.2405	41.0064	41.1917	41.2916	41.4769	AAEL007201-PA	AAEL007201-PA	AAEL007201-PA	AAEL007201-PA	AAEL007201-PA	AAEL007201-PA	glutamyl aminopeptidase protein_coding supercont1.243:1008299-1026342:1 gene:AAEL007201	114155	5.84
13342	765.431	23.81	23.84	112.489	1881	1816					3344	2988						8	MQIFVK		PEP_FRAG_1	61	66	b2b3b3*b4y3y4y6	7	7.8733	7.8733	0	4	4	765.43	3538	1	1	0.2041	23.9853	23.821	23.9551	24.0275	24.1616	AAEL000795-PA,AAEL003877-PB,AAEL006511-PA,AAEL013536-PA,AAEL003877-PA	AAEL000795-PA,AAEL003877-PB,AAEL006511-PA,AAEL013536-PA,AAEL003877-PA
13428	766.452	28.83	28.81	117.321			2905	3007		1837	1133	1293	4007	3403		2135	2359	13	YLLVMK		PEP_FRAG_1	516	521	b2b3y1y2y3y4y6	7	7.6179	7.6179	0	7	8	766.452	2379	1	1	0.1759	28.7056	28.5474	28.6699	28.736	28.8586	AAEL012062-PA,AAEL012062-PB	AAEL012062-PA,AAEL012062-PB	AAEL012062-PB	AAEL012062-PB	AAEL012062-PB	AAEL012062-PB	Na /K ATPase alpha subunit protein_coding supercont1.650:473391-547252:1 gene:AAEL012062	115852	5.34
13566	769.475	32.51	32.51	46.9911	2826		2149	1866		3483	2805	2969				3108	3052	12	IPLLADK		PEP_FRAG_1	95	101	b6y4y7	3	5.9021	6.8238	0.0005	1	2	769.475	2864	1.55	2	0.2174	32.5636	32.3589	32.5201	32.607	32.7681	AAEL004112-PA	AAEL004112-PA	AAEL004112-PA	AAEL004112-PA	AAEL004112-PA	AAEL004112-PA	Thioredoxin Peroxidase. protein_coding supercont1.107:2094566-2095144:-1 gene:AAEL004112	21608.6	5.57
13570	770.358	26.96	26.93	111.941					1797	2200						3324	3580	13	PYTMMK		PEP_FRAG_2	79	84	b2b3b3°b4b5b5°y1y2y3y4y4°	11	7.3222	7.3222	0	3	3	770.359	4154	1.21	1	0.3456	26.8903	26.5913	26.8237	26.949	27.1814	AAEL011195-PA,AAEL011184-PA	AAEL011195-PA,AAEL011184-PA
13592	770.406	43.22	43.22	108.301							1808							7	LNYFIT		PEP_FRAG_1	211	216	b4y3°y6	3	5.8851	5.8851	0.0038	1	2	770.406	1808	1	1	0.2297	43.2198	42.988	43.1689	43.2664	43.4474	AAEL000541-PA,AAEL000541-PB	AAEL000541-PA,AAEL000541-PB	AAEL000541-PA	AAEL000541-PA	AAEL000541-PA	AAEL000541-PA	fasciclin, putative protein_coding supercont1.10:3468870-3502881:1 gene:AAEL000541	40966.6	5.78
13598	770.409	50.66	50.65	110.577	8556	8625	6936	7034			2784	2907						3	LNYFIT		PEP_FRAG_1	211	216	b3y5°	2	5.3678	5.8851	0.0038	1	2	770.407	6727	1	1	0.2469	50.6917	50.519	50.6576	50.7324	50.8711	AAEL000541-PB,AAEL000541-PA	AAEL000541-PB,AAEL000541-PA	AAEL000541-PA	AAEL000541-PA	AAEL000541-PA	AAEL000541-PA	fasciclin, putative protein_coding supercont1.10:3468870-3502881:1 gene:AAEL000541	40966.6	5.78
13642	771.421	30.58	30.59	111.607					1991	1870	1123	1115			2003	2308	2808	5	QLESALK	Pyrrolidone carboxylic acid N-TERM(1)	VAR_MOD	153	159	b3b4°b5b5°y2y4y7	7	5.4928	5.4928	0.0038	2	2	771.42	1191	1	1	0.3239	30.6458	30.4471	30.6058	30.6913	30.85	AAEL010823-PA	AAEL010823-PA	AAEL010823-PA	AAEL010823-PA	AAEL010823-PA	AAEL010823-PA	ATP synthase delta chain protein_coding supercont1.510:118448-139104:1 gene:AAEL010823	22717.5	10.1
13644	771.422	29.29	29.26	112.405	3190	3401	4441	4284			2947	2936	3040	2872				8	QLESIAK	Pyrrolidone carboxylic acid N-TERM(1)	VAR_MOD	158	164	b2b3b4b4°b5b5°b6y1y2y4y7	11	6.001	6.001	0.0038	5	5	771.422	3508	1	1	0.2614	29.3228	29.1502	29.2871	29.3608	29.4977	AAEL015070-PA	AAEL015070-PA	AAEL015070-PA	AAEL015070-PA	AAEL015070-PA	AAEL015070-PA	alkaline phosphatase protein_coding supercont1.1446:21418-70765:-1 gene:AAEL015070	58629.8	5.78
13749	773.433	23.57	23.58	113.371	2813	2989	2234				3949	4023						2	GIEIWR		PEP_FRAG_2	44	49	y4y5y6	3	6.7008	6.7008	0.0009	1	4	773.434	2541	1.48	1	0.2999	23.4035	23.2041	23.3576	23.4404	23.5939	AAEL006096-PA,AAEL006102-PA	AAEL006096-PA,AAEL006102-PA	AAEL006096-PA	AAEL006096-PA	AAEL006096-PA	AAEL006096-PA	Gelsolin precursor protein_coding supercont1.189:2000883-2002111:1 gene:AAEL006096	43105	9.44
13750	773.438	26.33	26.34	112.473			1493	1515			1981							4	PTISIDK		PEP_FRAG_1	141	147	y1y4y6y7	4	5.754	6.3151	0.0035	1	4	773.438	1130	1.41	1	0.2934	26.288	26.0027	26.2338	26.3584	26.5896	AAEL011821-PA,AAEL011821-PB	AAEL011821-PA,AAEL011821-PB	AAEL011821-PB	AAEL011821-PB	AAEL011821-PB	AAEL011821-PB	adenylyl cyclase-associated protein protein_coding supercont1.617:112004-174963:-1 gene:AAEL011821	23175.5	7.9
13752	773.415	27.19	27.23	110.209													1022	13	GIEIWR		PEP_FRAG_2	44	49	b3y3y5y6	4	5.3654	6.7008	0.0009	1	4	773.415	1022	1	1	0.2559	27.1927	26.9686	27.1452	27.2404	27.4169	AAEL006102-PA,AAEL006096-PA	AAEL006102-PA,AAEL006096-PA	AAEL006096-PA	AAEL006096-PA	AAEL006096-PA	AAEL006096-PA	Gelsolin precursor protein_coding supercont1.189:2000883-2002111:1 gene:AAEL006096	43105	9.44
13753	773.428	30.15	30.14	111.815	1294													1	GIEIWR		PEP_FRAG_1	44	49	b3y4y6	3	6.6383	6.7008	0.0009	1	4	773.428	1294	1	1	0.2199	30.154	29.9566	30.1282	30.2207	30.3922	AAEL006096-PA,AAEL006102-PA	AAEL006096-PA,AAEL006102-PA	AAEL006096-PA	AAEL006096-PA	AAEL006096-PA	AAEL006096-PA	Gelsolin precursor protein_coding supercont1.189:2000883-2002111:1 gene:AAEL006096	43105	9.44
13757	773.437	32.69	32.7	108.572	2857	3273	4354	3963			2923	3263						1	VTDGALVV		PEP_FRAG_1	125	132	b2b3°b4b5b6b7°b8y7°	8	6.3818	6.3818	0.0035	3	6	773.436	2503	1	1	0.2266	32.7259	32.5512	32.693	32.7694	32.9113	AAEL004500-PA,AAEL004500-PB	AAEL004500-PA,AAEL004500-PB	AAEL004500-PA	AAEL004500-PA	AAEL004500-PA	AAEL004500-PA	eukaryotic translation elongation factor protein_coding supercont1.121:1852844-1861602:-1 gene:AAEL004500	95362.5	5.95
13760	773.438	35.63	35.66	106.919				1431										4	VTDGALVV		PEP_FRAG_1	125	132	b3°b5b8	3	5.7534	6.3818	0.0035	1	6	773.438	1431	1	1	0.2143	35.6321	35.4439	35.592	35.6719	35.8201	AAEL004500-PA,AAEL004500-PB	AAEL004500-PA,AAEL004500-PB	AAEL004500-PA	AAEL004500-PA	AAEL004500-PA	AAEL004500-PA	eukaryotic translation elongation factor protein_coding supercont1.121:1852844-1861602:-1 gene:AAEL004500	95362.5	5.95
13765	773.414	37.61	37.61	109.769					2593	2238						3967	4022	12	GIEIWR		PEP_FRAG_2	44	49	b3b5y1y6	4	5.1276	6.7008	0.0009	1	4	773.414	3924	1.09	1	0.3106	37.647	37.4307	37.598	37.6882	37.8555	AAEL006102-PA,AAEL006096-PA	AAEL006102-PA,AAEL006096-PA	AAEL006096-PA	AAEL006096-PA	AAEL006096-PA	AAEL006096-PA	Gelsolin precursor protein_coding supercont1.189:2000883-2002111:1 gene:AAEL006096	43105	9.44
13769	773.434	44.68	44.64	114.291												1375		12	VTDGALVV		PEP_FRAG_2	125	132	b4b5y8	3	5.4462	6.3818	0.0035	1	6	773.434	1375	1	1	0.1587	44.6817	44.5301	44.6551	44.7225	44.8475	AAEL004500-PA,AAEL004500-PB	AAEL004500-PA,AAEL004500-PB	AAEL004500-PA	AAEL004500-PA	AAEL004500-PA	AAEL004500-PA	eukaryotic translation elongation factor protein_coding supercont1.121:1852844-1861602:-1 gene:AAEL004500	95362.5	5.95
13770	773.437	49.64	49.49	81.941					1009									5	VTDGALVV		PEP_FRAG_2	125	132	b3°y6	2	4.6424	6.3818	0.0035	1	6	773.437	1009	1	1	0.1529	49.6371	49.4896	49.6015	49.6618	49.7737	AAEL004500-PB,AAEL004500-PA	AAEL004500-PB,AAEL004500-PA	AAEL004500-PA	AAEL004500-PA	AAEL004500-PA	AAEL004500-PA	eukaryotic translation elongation factor protein_coding supercont1.121:1852844-1861602:-1 gene:AAEL004500	95362.5	5.95
13880	775.416	23.48	23.49	110.749			1306				1025					1312	1517	12	LESIADK		PEP_FRAG_2	296	302	b3b3°y3y7	4	6.3303	6.3303	0.0035	1	3	775.418	1209	1	1	0.2878	23.546	23.3136	23.5001	23.6007	23.7872	AAEL009185-PA	AAEL009185-PA	AAEL009185-PA	AAEL009185-PA	AAEL009185-PA	AAEL009185-PA	arginine or creatine kinase protein_coding supercont1.377:1030526-1046490:1 gene:AAEL009185	40216.5	5.95
13888	775.426	17.57	17.58	45.183												1713		12	MMIRPK		PEP_FRAG_1	347	352	y3y4y5	3	6.9729	7.1071	0	1	2	775.426	1713	2	2	0.197	17.5652	17.3768	17.5237	17.6028	17.7497	AAEL000749-PA,AAEL006704-PA	AAEL000749-PA,AAEL006704-PA
13889	775.424	17.48	17.52	45.069													2065	13	MMIRPK		PEP_FRAG_1	347	352	y3y4y5	3	7.1071	7.1071	0	1	2	775.424	2065	2	2	0.1974	17.4754	17.283	17.4378	17.5213	17.6762	AAEL000749-PA,AAEL006704-PA	AAEL000749-PA,AAEL006704-PA
13930	776.371	41.67	41.67	108.164	2882	3159	2553	2543			2769	2378						2	IEEELGS		PEP_FRAG_2	414	420	b5°b6°y7	3	5.2385	5.2385	0.0041	1	2	776.37	2537	1	1	0.2372	41.5587	41.3427	41.517	41.611	41.7853	AAEL001668-PA	AAEL001668-PA	AAEL001668-PA	AAEL001668-PA	AAEL001668-PA	AAEL001668-PA	enolase protein_coding supercont1.38:1462458-1464130:1 gene:AAEL001668	46906.5	6.29
13947	776.394	30.8	30.77	112.087					3343	3899						2355	2843	5	LIDDMVA		PEP_FRAG_2	249	255	b6y4°	2	4.4566	4.4566	0.0043	1	2	776.394	2000	1	1	0.2821	30.8366	30.6417	30.7992	30.8842	31.0417	AAEL000746-PA	AAEL000746-PA	AAEL000746-PA	AAEL000746-PA	AAEL000746-PA	AAEL000746-PA	NADP-specific isocitrate dehydrogenase protein_coding supercont1.15:4012358-4013587:-1 gene:AAEL000746	46294	6.4
13960	776.395	57.44	57.44	109.927	2174	2469	2089	2344			3295	3357						4	LIDDMVA		PEP_FRAG_2	249	255	b3y4y7	3	4.2913	4.4566	0.0043	1	2	776.395	1831	1	1	0.2626	57.3655	57.1057	57.3125	57.424	57.6308	AAEL000746-PA	AAEL000746-PA	AAEL000746-PA	AAEL000746-PA	AAEL000746-PA	AAEL000746-PA	NADP-specific isocitrate dehydrogenase protein_coding supercont1.15:4012358-4013587:-1 gene:AAEL000746	46294	6.4
14082	778.445	40.71	40.7	114.618	4769	4469	3475	2947			3471	3305						4	LLETFR		PEP_FRAG_1	175	180	y4y5y6	3	5.4724	5.4724	0.0038	1	4	778.447	2299	1.19	1	0.2199	40.6445	40.4588	40.6087	40.6895	40.8393	AAEL014110-PA,AAEL014252-PA	AAEL014110-PA,AAEL014252-PA	AAEL014110-PA	AAEL014110-PA	AAEL014110-PA	AAEL014110-PA	sulfite reductase protein_coding supercont1.1008:302286-315277:1 gene:AAEL014110	63692	7.13
14094	778.444	41.29	41.27	117.267	2087	1827	1787	1852	1823		2779	3127				1651	2012	2	LLETFR		PEP_FRAG_2	175	180	b4b5°y6	3	3.9888	5.4724	0.0038	1	4	778.446	1468	1	1	0.2004	41.1136	40.9131	41.0709	41.156	41.3138	AAEL014110-PA,AAEL014252-PA	AAEL014110-PA,AAEL014252-PA	AAEL014110-PA	AAEL014110-PA	AAEL014110-PA	AAEL014110-PA	sulfite reductase protein_coding supercont1.1008:302286-315277:1 gene:AAEL014110	63692	7.13
14143	779.446	32.29	32.3	116.797	3355	3454	2248	2263			3235	3120						8	MIFAGLK		PEP_FRAG_1	85	91	b2y3y5y7	4	7.6947	7.6947	0	3	3	779.448	3829	1.1	1	0.244	32.4889	32.3071	32.4521	32.5302	32.6751	AAEL004457-PA,AAEL004457-PC,AAEL004457-PB	AAEL004457-PA,AAEL004457-PC,AAEL004457-PB	AAEL004457-PA	AAEL004457-PA	AAEL004457-PA	AAEL004457-PA	cytochrome c protein_coding supercont1.120:1912200-1912526:-1 gene:AAEL004457	11874.6	9.88
14146	779.429	39.21	39.2	111.114	28390	29767	31581	31401			12501	11317						1	FSIVSLN		PEP_FRAG_1	287	293	b3b4b7y2*y3y3*y3°y4y4*y4°y6*	11	6.8432	6.8432	0.0005	3	3	779.429	34230	1	1	0.2259	39.2611	39.0847	39.2233	39.2981	39.4368	AAEL005725-PA	AAEL005725-PA	AAEL005725-PA	AAEL005725-PA	AAEL005725-PA	AAEL005725-PA	conserved hypothetical protein protein_coding supercont1.171:1919701-1928756:1 gene:AAEL005725	39406.7	4.64
14187	780.398	43.27	43.26	111.08	1490	1727	4045	3382			1511	1170						4	TEIIAFS		PEP_FRAG_2	47	53	b3°y3y6°	3	6.0202	6.0291	0.0038	1	2	780.398	2642	1	1	0.3146	43.2095	42.9493	43.155	43.266	43.4717	AAEL004112-PA	AAEL004112-PA	AAEL004112-PA	AAEL004112-PA	AAEL004112-PA	AAEL004112-PA	Thioredoxin Peroxidase. protein_coding supercont1.107:2094566-2095144:-1 gene:AAEL004112	21608.6	5.57
14188	780.394	42.7	42.69	107.042	14861	12768	10480	9707			15794	14562						1	TEIIAFS		PEP_FRAG_2	47	53	b4b6	2	6.0291	6.0291	0.0038	1	2	780.394	16395	1	1	0.2101	42.7423	42.5721	42.7052	42.7769	42.9099	AAEL004112-PA	AAEL004112-PA	AAEL004112-PA	AAEL004112-PA	AAEL004112-PA	AAEL004112-PA	Thioredoxin Peroxidase. protein_coding supercont1.107:2094566-2095144:-1 gene:AAEL004112	21608.6	5.57
14287	783.351	55.76	55.73	105.698	4463	4757	3000	2988			4939	5001						4	NFQEFV		PEP_FRAG_2	465	470	b4*b5	2	5.8365	6.5823	0.002	2	3	783.351	2331	1	1	0.3864	55.7134	55.3295	55.6339	55.7979	56.1023	AAEL008787-PA	AAEL008787-PA	AAEL008787-PA	AAEL008787-PA	AAEL008787-PA	AAEL008787-PA	V-type proton ATPase catalytic subunit A (V-ATPase subunit A)(EC 3.6.3.14)(Vacuolar proton pump subunit alpha)(V-ATPase 69 kDa subunit) protein_coding supercont1.349:699238-710948:1 gene:AAEL008787	68571.2	5.08
14299	783.369	31.77	31.75	108.643	6843	7194	14572	15428	3412	3415	8795	9039	4734	5210			2553	8	NFQEFV		PEP_FRAG_2	465	470	b2b4°b5*y4y6	5	6.5823	6.5823	0.002	1	3	783.37	15042	1.07	1	0.3621	31.8246	31.5672	31.7698	31.879	32.0815	AAEL008787-PA	AAEL008787-PA	AAEL008787-PA	AAEL008787-PA	AAEL008787-PA	AAEL008787-PA	V-type proton ATPase catalytic subunit A (V-ATPase subunit A)(EC 3.6.3.14)(Vacuolar proton pump subunit alpha)(V-ATPase 69 kDa subunit) protein_coding supercont1.349:699238-710948:1 gene:AAEL008787	68571.2	5.08
14412	785.43	36.4	36.38	107.119	1446	1411					1467	1418						7	DLVPWR		PEP_FRAG_1	341	346	b3°b5y1y2y3y5y6	7	7.3629	7.3629	0	2	2	785.429	1706	1	1	0.2166	36.3906	36.1732	36.3438	36.4358	36.6064	AAEL006347-PA	AAEL006347-PA	AAEL006347-PA	AAEL006347-PA	AAEL006347-PA	AAEL006347-PA	Apyrase Precursor (EC 3.6.1.5)(Adenosine diphosphatase)(ATP-diphosphohydrolase)(ATP-diphosphatase)(ADPase)(Allergen Aed a 1) protein_coding supercont1.201:1129123-1131245:-1 gene:AAEL006347	63210.4	8.2
14463	786.446	46.87	46.81	106.24			4546	4475			1294	1281	5051	5026			1024	4	QNIADLI		PEP_FRAG_2	329	335	b3*b4b6y7y7*	5	5.7053	5.7053	0.0038	2	2	786.445	3655	1	1	0.2698	46.8094	46.6343	46.7707	46.8443	46.9808	AAEL005805-PA,AAEL005808-PA	AAEL005805-PA,AAEL005808-PA	AAEL005808-PA	AAEL005808-PA	AAEL005808-PA	AAEL005808-PA	alanyl aminopeptidase protein_coding supercont1.175:1829915-1835576:-1 gene:AAEL005808	108693	4.7
14537	788.295	34.82	34.8	107.202	2293	2391					1621	1605						2	DLSYCM	Carbamidomethyl C(5)	PEP_FRAG_2	139	144	b2b3b3°y2y3	5	5.7383	5.7383	0.0038	2	2	788.298	1924	1	1	0.2312	34.7524	34.5756	34.7146	34.7895	34.9286	AAEL009670-PA	AAEL009670-PA	AAEL009670-PA	AAEL009670-PA	AAEL009670-PA	AAEL009670-PA	C-Type Lysozyme (Lys-D). protein_coding supercont1.417:946162-946657:1 gene:AAEL009670	16475.5	8.71
14563	788.416	36.03	36.08	106.437													1114	13	TVELAGAQ		PEP_FRAG_2	199	206	b4°b7y8	3	4.5709	5.4184	0.0038	1	2	788.416	1114	1	1	0.2493	36.0281	35.7855	35.9819	36.0878	36.2842	AAEL007707-PA	AAEL007707-PA	AAEL007707-PA	AAEL007707-PA	AAEL007707-PA	AAEL007707-PA	malate dehydrogenase protein_coding supercont1.275:935176-952474:-1 gene:AAEL007707	36491.9	5.97
14700	790.484	10.48	10.49	47.033								1074						8	RLFQVK		PEP_FRAG_2	134	139	b3y4	2	5.4534	5.6856	0.0038	1	2	790.484	1074	2	2	0.2707	10.4822	10.2741	10.4367	10.5243	10.6869	AAEL006095-PA,AAEL006095-PB,AAEL006090-PA,AAEL006090-PB	AAEL006095-PA,AAEL006095-PB,AAEL006090-PA,AAEL006090-PB	AAEL006090-PA	AAEL006090-PA	AAEL006090-PA	AAEL006090-PA	Gelsolin precursor protein_coding supercont1.189:2008411-2031099:1 gene:AAEL006090	81911.9	4.72
14702	790.485	10.42	10.42	47.065							1013							7	RLFQVK		PEP_FRAG_2	134	139	b4y1y4y6	4	5.6856	5.6856	0.0038	1	2	790.485	1013	2	2	0.217	10.4185	10.2029	10.3738	10.466	10.637	AAEL006095-PA,AAEL006090-PA,AAEL006090-PB,AAEL006095-PB	AAEL006095-PA,AAEL006090-PA,AAEL006090-PB,AAEL006095-PB	AAEL006090-PA	AAEL006090-PA	AAEL006090-PA	AAEL006090-PA	Gelsolin precursor protein_coding supercont1.189:2008411-2031099:1 gene:AAEL006090	81911.9	4.72
14827	793.412	19.41	19.48	113.288				3506										4	GLGYQQK		PEP_FRAG_2	243	249	b3b4b6y2y3y5y5*y7	8	7.6912	7.6912	0	1	4	793.412	3506	1	1	0.2748	19.4123	19.1423	19.3566	19.4722	19.6866	AAEL001872-PA	AAEL001872-PA	AAEL001872-PA	AAEL001872-PA	AAEL001872-PA	AAEL001872-PA	voltage-dependent anion-selective channel protein_coding supercont1.44:690107-695296:-1 gene:AAEL001872	30810.3	8.87
14831	793.419	19.5	19.48	113.355									3347	3585		2647	3149	10	GLGYQQK		PEP_FRAG_1	243	249	y3*y5y7	3	7.1203	7.6912	0	2	4	793.418	1535	1	1	0.178	19.541	19.383	19.5103	19.579	19.7064	AAEL001872-PA	AAEL001872-PA	AAEL001872-PA	AAEL001872-PA	AAEL001872-PA	AAEL001872-PA	voltage-dependent anion-selective channel protein_coding supercont1.44:690107-695296:-1 gene:AAEL001872	30810.3	8.87
14834	793.419	20.21	20.23	111.699	3952	4244	3177	3162			5089	4772						4	AAISEFR		PEP_FRAG_2	2	8	b6b7°y4y7	4	5.635	5.635	0.0038	1	2	793.418	2333	1	1	0.213	20.1258	19.9499	20.0896	20.165	20.3047	AAEL010789-PA	AAEL010789-PA	AAEL010789-PA	AAEL010789-PA	AAEL010789-PA	AAEL010789-PA	conserved hypothetical protein protein_coding supercont1.508:615885-683885:1 gene:AAEL010789	21531	4.67
14835	793.415	26.42	26.32	110.889								1780						8	AAISEFR		PEP_FRAG_1	2	8	b3b4b5°b7y5y6	6	5.4169	5.635	0.0038	1	2	793.415	1780	1	1	0.3643	26.4244	26.17	26.3402	26.4319	26.6021	AAEL010789-PA	AAEL010789-PA	AAEL010789-PA	AAEL010789-PA	AAEL010789-PA	AAEL010789-PA	conserved hypothetical protein protein_coding supercont1.508:615885-683885:1 gene:AAEL010789	21531	4.67
14850	793.39	35.57	35.58	109.192	26477	22939	12683	12372			19503	19095						2	ALEAYNL		PEP_FRAG_2	76	82	b3°b4y5°	3	4.722	4.9415	0.0043	1	2	793.389	25402	1	1	0.2458	35.4468	35.2209	35.4003	35.497	35.6765	AAEL011447-PB	AAEL011447-PB	AAEL011447-PB	AAEL011447-PB	AAEL011447-PB	AAEL011447-PB	60S ribosomal protein L14 protein_coding supercont1.581:154387-162654:-1 gene:AAEL011447	20650.5	11.51
14868	793.424	42.48	42.47	114.268	4289	3905	2815	2482	2894	2842	7160	7305				1791	2043	12	ALEAYNL		PEP_FRAG_2	76	82	y4y6*	2	4.9415	4.9415	0.0043	1	2	793.424	1641	1	1	0.3487	42.5241	42.2483	42.4566	42.5689	42.7772	AAEL011447-PB	AAEL011447-PB	AAEL011447-PB	AAEL011447-PB	AAEL011447-PB	AAEL011447-PB	60S ribosomal protein L14 protein_coding supercont1.581:154387-162654:-1 gene:AAEL011447	20650.5	11.51
14900	794.359	22.36	22.38	108.845	3809	3391					1619	1775						1	AQYNDIA		PEP_FRAG_2	211	217	b3b5*y3y7	4	4.9183	4.9183	0.0043	2	2	794.359	3828	1	1	0.2523	22.3657	22.1479	22.3184	22.4104	22.581	AAEL000028-PA	AAEL000028-PA	AAEL000028-PA	AAEL000028-PA	AAEL000028-PA	AAEL000028-PA	Clip-Domain Serine Protease family B. protein_coding supercont1.1:2095012-2113327:-1 gene:AAEL000028	40568.4	7.5
14936	794.403	28.86	28.86	117.358			17141	16630	7202	7142	1043	917	12453	12340	3168	6834	6709	4	GLNFSEK		PEP_FRAG_1	67	73	b2b3b4b5b5*b5°b6*b7b7*y1y2y2°y3y3°y4y5y5*y6y7	19	8.4581	8.4581	0	9	9	794.404	17480	1.04	1	0.3016	28.7883	28.6155	28.752	28.8256	28.9621	AAEL001872-PA	AAEL001872-PA	AAEL001872-PA	AAEL001872-PA	AAEL001872-PA	AAEL001872-PA	voltage-dependent anion-selective channel protein_coding supercont1.44:690107-695296:-1 gene:AAEL001872	30810.3	8.87
15047	796.384	38.41	38.38	114.075			1407											3	VYISWE		PEP_FRAG_1	403	408	b2y2°y4y4°y5	5	6.7246	6.8324	0.0005	1	2	796.384	1407	1.37	1	0.2694	38.4076	38.1887	38.3754	38.4761	38.6629	AAEL000667-PA,AAEL000667-PB	AAEL000667-PA,AAEL000667-PB	AAEL000667-PB	AAEL000667-PB	AAEL000667-PB	AAEL000667-PB	alpha-amylase protein_coding supercont1.13:1013259-1029340:-1 gene:AAEL000667	67228.9	5.2
15048	796.392	38.48	38.39	113.726								2172						8	VYISWE		PEP_FRAG_2	403	408	b2b6°y3y4y5°	5	6.8324	6.8324	0.0005	1	2	796.392	2172	1.39	1	0.3011	38.4781	38.2093	38.4228	38.5379	38.7514	AAEL000667-PB,AAEL000667-PA	AAEL000667-PB,AAEL000667-PA	AAEL000667-PB	AAEL000667-PB	AAEL000667-PB	AAEL000667-PB	alpha-amylase protein_coding supercont1.13:1013259-1029340:-1 gene:AAEL000667	67228.9	5.2
15147	798.419	8.54	8.77	45.266	2300													1	MHELIR		PEP_FRAG_2	139	144	y4y5	2	6.2242	6.9938	0	1	2	798.419	2300	1.7	2	0.2005	8.5425	8.3702	8.5037	8.5757	8.7092	AAEL006485-PC,AAEL006485-PA,AAEL006485-PB	AAEL006485-PC,AAEL006485-PA,AAEL006485-PB	AAEL006485-PA	AAEL006485-PA	AAEL006485-PA	AAEL006485-PA	inosine-uridine preferring nucleoside hydrolase protein_coding supercont1.208:816972-818047:-1 gene:AAEL006485	38220.9	4.74
15151	798.425	8.47	8.73	45.341		1985												2	MHELIR		PEP_FRAG_1	139	144	b2y3y4y5y6	5	6.9938	6.9938	0	1	2	798.425	1985	1.74	2	0.2262	8.4681	8.2841	8.4278	8.5053	8.649	AAEL006485-PA,AAEL006485-PB,AAEL006485-PC	AAEL006485-PA,AAEL006485-PB,AAEL006485-PC	AAEL006485-PA	AAEL006485-PA	AAEL006485-PA	AAEL006485-PA	inosine-uridine preferring nucleoside hydrolase protein_coding supercont1.208:816972-818047:-1 gene:AAEL006485	38220.9	4.74
15305	800.528	14.44	14.49	49.1712						6169	9028		4195			4973	4960	7	RGILTLK		PEP_FRAG_1	63	69	b3b4b5b5°b6y1y6°y7	8	7.391	7.391	0	3	3	800.528	14749	1.92	2	0.2747	14.4826	14.2095	14.4258	14.5425	14.7588	AAEL001673-PA,AAEL001928-PA,AAEL001951-PA,AAEL004616-PA,AAEL005961-PA,AAEL005964-PA,AAEL009451-PA,AAEL011197-PA,AAEL011197-PB,AAEL004631-PA	AAEL001673-PA,AAEL001928-PA,AAEL001951-PA,AAEL004616-PA,AAEL005961-PA,AAEL005964-PA,AAEL009451-PA,AAEL011197-PA,AAEL011197-PB,AAEL004631-PA
15349	801.481	19.4	19.42	117.105	3821	3778	1619	1618			2887	3089						2	NNLSLIK		PEP_FRAG_1	126	132	b2b3b4b4°b5b5°y3y4y7y7*	10	7.295	7.295	0	4	5	801.481	3411	1	1	0.2233	19.3003	19.1309	19.266	19.3388	19.4739	AAEL005772-PA	AAEL005772-PA	AAEL005772-PA	AAEL005772-PA	AAEL005772-PA	AAEL005772-PA	odorant binding protein OBP22 protein_coding supercont1.174:1533074-1533545:1 gene:AAEL005772	16208.4	5.52
15353	801.481	29.89	29.86	117.826					3848	3963			2865	2560	8853	21440	20579	13	NNLSLIK		PEP_FRAG_1	126	132	b4b5b5°b6b6*b6°b7y6y7	9	5.9536	7.295	0	1	5	801.482	38873	1.06	1	0.2109	29.8517	29.6936	29.8187	29.8862	30.0114	AAEL005772-PA	AAEL005772-PA	AAEL005772-PA	AAEL005772-PA	AAEL005772-PA	AAEL005772-PA	odorant binding protein OBP22 protein_coding supercont1.174:1533074-1533545:1 gene:AAEL005772	16208.4	5.52
15382	802.43	10.12	10.28	118.527		1103												2	ADVELAGK		PEP_FRAG_1	291	298	y3y4y8	3	6.9011	7.7917	0	1	2	802.43	1103	1	1	0.2842	10.1228	9.8335	10.0574	10.178	10.4019	AAEL006485-PB,AAEL006485-PC,AAEL006485-PA	AAEL006485-PB,AAEL006485-PC,AAEL006485-PA	AAEL006485-PA	AAEL006485-PA	AAEL006485-PA	AAEL006485-PA	inosine-uridine preferring nucleoside hydrolase protein_coding supercont1.208:816972-818047:-1 gene:AAEL006485	38220.9	4.74
15383	802.428	10.17	10.31	118.226	1111													1	ADVELAGK		PEP_FRAG_1	291	298	b3b4b5b6y3y4y8	7	7.7917	7.7917	0	1	2	802.428	1111	1	1	0.3453	10.1689	9.9194	10.1182	10.2253	10.4242	AAEL006485-PA,AAEL006485-PC,AAEL006485-PB	AAEL006485-PA,AAEL006485-PC,AAEL006485-PB	AAEL006485-PA	AAEL006485-PA	AAEL006485-PA	AAEL006485-PA	inosine-uridine preferring nucleoside hydrolase protein_coding supercont1.208:816972-818047:-1 gene:AAEL006485	38220.9	4.74
15478	803.418	49.26	49.29	115.386	1482	1704				1892	1658							6	NWLGWK		PEP_FRAG_1	57	62	b4y3y4	3	6.4557	6.4557	0.0029	1	3	803.42	1155	1	1	0.2066	49.1893	49.0006	49.1494	49.2296	49.3784	AAEL006417-PA	AAEL006417-PA	AAEL006417-PA	AAEL006417-PA	AAEL006417-PA	AAEL006417-PA	D7 protein, putative protein_coding supercont1.204:322860-324089:1 gene:AAEL006417	39198.1	9.55
15658	807.398	40.49	40.49	107.555							1033							7	ARDLDAF		PEP_FRAG_1	125	131	b4°b5°y5y6y7	5	5.6269	5.6269	0.0038	1	2	807.398	1033	1	1	0.2322	40.4874	40.2548	40.4376	40.5362	40.7191	AAEL002501-PA	AAEL002501-PA	AAEL002501-PA	AAEL002501-PA	AAEL002501-PA	AAEL002501-PA	protein disulfide isomerase protein_coding supercont1.59:950939-959328:-1 gene:AAEL002501	45064.5	4.89
15687	807.434	30.34	30.36	114.717	1947	1793					1761	1824						2	ASFVDLR		PEP_FRAG_1	873	879	y5y6y7	3	4.9362	4.9362	0.0043	1	2	807.436	1458	1	1	0.2756	30.1529	29.8759	30.093	30.21	30.4271	AAEL008607-PA	AAEL008607-PA	AAEL008607-PA	AAEL008607-PA	AAEL008607-PA	AAEL008607-PA	tep3 protein_coding supercont1.334:522557-599936:-1 gene:AAEL008607	163616	5.44
15688	807.434	33.92	33.98	117.193											2698	5004	5331	13	ASFVDLR		PEP_FRAG_1	873	879	b5b7°y1y5y7	5	4.7067	4.9362	0.0043	1	2	807.434	7294	1	1	0.3005	33.9194	33.7235	33.8745	33.9559	34.107	AAEL008607-PA	AAEL008607-PA	AAEL008607-PA	AAEL008607-PA	AAEL008607-PA	AAEL008607-PA	tep3 protein_coding supercont1.334:522557-599936:-1 gene:AAEL008607	163616	5.44
15691	807.395	26.21	26.19	109.845	7022	7009	7394	6911	14858	14181	14958	14856	12068	12501		2428	2712	13	ARDLDAF		PEP_FRAG_1	125	131	b6y4y7	3	5.5871	5.6269	0.0038	1	2	807.396	2734	1	1	0.3126	26.1449	25.9451	26.1039	26.1894	26.3482	AAEL002501-PA	AAEL002501-PA	AAEL002501-PA	AAEL002501-PA	AAEL002501-PA	AAEL002501-PA	protein disulfide isomerase protein_coding supercont1.59:950939-959328:-1 gene:AAEL002501	45064.5	4.89
15696	807.46	30.46	30.43	45.21												3045		12	FALELSK		PEP_FRAG_1	75	81	b2b3b4b6°y1y2y3y4y5y7	10	7.5106	7.7106	0	1	4	807.46	3045	1.55	2	0.2137	30.4565	30.2668	30.4153	30.4954	30.6439	AAEL010464-PC	AAEL010464-PC	AAEL010464-PC	AAEL010464-PC	AAEL010464-PC	AAEL010464-PC	glutamate dehydrogenase protein_coding supercont1.479:643188-688355:1 gene:AAEL010464	46979.4	6.45
15698	807.455	30.36	30.41	45.044													4253	13	FALELSK		PEP_FRAG_1	75	81	b4y2y3y4y5y6	6	7.7106	7.7106	0	1	4	807.455	4253	1.52	2	0.3418	30.3598	30.158	30.3163	30.4016	30.5599	AAEL010464-PC	AAEL010464-PC	AAEL010464-PC	AAEL010464-PC	AAEL010464-PC	AAEL010464-PC	glutamate dehydrogenase protein_coding supercont1.479:643188-688355:1 gene:AAEL010464	46979.4	6.45
15699	807.454	30.56	30.44	45.203					1206									5	FALELSK		PEP_FRAG_1	75	81	b4y4y5	3	6.3164	7.7106	0	1	4	807.454	1206	1.52	2	0.2873	30.5556	30.3487	30.5072	30.5927	30.7512	AAEL010464-PC	AAEL010464-PC	AAEL010464-PC	AAEL010464-PC	AAEL010464-PC	AAEL010464-PC	glutamate dehydrogenase protein_coding supercont1.479:643188-688355:1 gene:AAEL010464	46979.4	6.45
15701	807.46	30.2	30.38	45.355											6073			11	FALELSK		PEP_FRAG_1	75	81	b2y1y3y4y6y7	6	6.8924	7.7106	0	1	4	807.46	6073	1.88	2	0.2029	30.2025	30.0129	30.1638	30.2452	30.3961	AAEL010464-PC	AAEL010464-PC	AAEL010464-PC	AAEL010464-PC	AAEL010464-PC	AAEL010464-PC	glutamate dehydrogenase protein_coding supercont1.479:643188-688355:1 gene:AAEL010464	46979.4	6.45
15874	811.494	18.61	18.61	121.155							2090							7	LLGPGLNK		PEP_FRAG_2	123	130	b8y4y5y6y6*	5	6.7744	6.8102	0.0005	1	4	811.494	2090	1.45	1	0.2196	18.6052	18.4149	18.5646	18.6454	18.7951	AAEL013221-PC	AAEL013221-PC	AAEL013221-PC	AAEL013221-PC	AAEL013221-PC	AAEL013221-PC	60S ribosomal protein L10a protein_coding supercont1.808:243305-244507:-1 gene:AAEL013221	24838.4	10.26
15875	811.5	18.64	18.61	121.426	1429	1397						2053						8	LLGPGLNK		PEP_FRAG_1	123	130	b8*y1y6y6*y7y7*	6	6.8102	6.8102	0.0005	3	4	811.501	2261	1.36	1	0.2577	18.7589	18.5623	18.7152	18.7977	18.9505	AAEL013221-PC	AAEL013221-PC	AAEL013221-PC	AAEL013221-PC	AAEL013221-PC	AAEL013221-PC	60S ribosomal protein L10a protein_coding supercont1.808:243305-244507:-1 gene:AAEL013221	24838.4	10.26
15899	812.394	33.02	32.99	117.318	8885	9781	16339	17030	2346	3312	7243	7652	8131	8553		1196	1615	7	FEDFVR		PEP_FRAG_1	666	671	b3b4b4°b5y1y2y3y4y5y6	10	7.1159	7.1159	0	6	6	812.392	12011	1.16	1	0.3117	32.9994	32.8312	32.9631	33.0342	33.166	AAEL005808-PA	AAEL005808-PA	AAEL005808-PA	AAEL005808-PA	AAEL005808-PA	AAEL005808-PA	alanyl aminopeptidase protein_coding supercont1.175:1829915-1835576:-1 gene:AAEL005808	108693	4.7
15961	813.416	30.02	30.03	118.149	1784	1713	1356	1785			1442	1697						7	LFTGTMK	Oxidation M(6)	VAR_MOD	122	128	b4b5°y5°	3	5.2654	5.5846	0.0038	1	2	813.415	1684	1	1	0.2114	30.0305	29.8177	29.9842	30.074	30.2405	AAEL000757-PB	AAEL000757-PB	AAEL000757-PB	AAEL000757-PB	AAEL000757-PB	AAEL000757-PB	anterior fat body protein protein_coding supercont1.16:3889508-3890623:1 gene:AAEL000757	33959.3	5.57
16142	816.466	31.42	31.43	46.0342	2600	2778					4895	5289						8	DLLGISAK		PEP_FRAG_2	227	234	b4°y5y8	3	5.2612	5.2612	0.0041	1	3	816.467	7774	1.71	2	0.2057	31.5498	31.3911	31.5178	31.5862	31.7129	AAEL006372-PA,AAEL015249-PA	AAEL006372-PA,AAEL015249-PA
16148	816.482	43.77	43.75	114.877			1701											3	SGLLDLAK		PEP_FRAG_1	15	22	y5°y6°	2	4.838	5.5409	0.0038	1	2	816.482	1701	1	1	0.1859	43.7747	43.5905	43.737	43.8159	43.9624	AAEL012825-PA	AAEL012825-PA	AAEL012825-PA	AAEL012825-PA	AAEL012825-PA	AAEL012825-PA	bifunctional purine biosynthesis protein protein_coding supercont1.745:463342-465242:1 gene:AAEL012825	64680.7	8
16157	816.48	35.58	35.55	119.866	1580		2191	2120	4758	4543	2154	2393	2480		2074	5048	5076	8	SGLLDLAK		PEP_FRAG_1	15	22	b6°b7y3y4y8	5	5.5409	5.5409	0.0038	1	2	816.479	2712	1	1	0.2136	35.7036	35.4925	35.6608	35.7515	35.9198	AAEL012825-PA	AAEL012825-PA	AAEL012825-PA	AAEL012825-PA	AAEL012825-PA	AAEL012825-PA	bifunctional purine biosynthesis protein protein_coding supercont1.745:463342-465242:1 gene:AAEL012825	64680.7	8
16166	816.471	49.92	49.9	116.594			6020	5746	2502	2192	1356	1387	2865				2761	4	DLLGISAK		PEP_FRAG_2	166	173	b5y4°y8	3	5.1847	5.2612	0.0041	2	3	816.47	5009	1	1	0.2247	49.7753	49.5998	49.7384	49.8132	49.9519	AAEL006372-PA,AAEL015249-PA	AAEL006372-PA,AAEL015249-PA
16192	817.449	59.04	59.05	119.439	4105	3413	5322	4495										2	YVIFYI		PEP_FRAG_1	26	31	b2b3b4b5y2	5	7.2929	7.5263	0	2	4	817.449	2772	1	1	0.2274	58.9699	58.7566	58.9235	59.0135	59.1805	AAEL003957-PA,AAEL003957-PB,AAEL003957-PC	AAEL003957-PA,AAEL003957-PB,AAEL003957-PC	AAEL003957-PA	AAEL003957-PA	AAEL003957-PA	AAEL003957-PA	conserved hypothetical protein protein_coding supercont1.102:781024-820437:-1 gene:AAEL003957	17333.6	7.02
16198	817.448	65.93	65.92	120.964	8431	9559	5422	5513			4826	5474						1	YVIFYI		PEP_FRAG_1	26	31	b2b3b4b5y2y3	6	7.5263	7.5263	0	2	4	817.448	8540	1	1	0.351	65.9641	65.7834	65.9261	66.003	66.1457	AAEL003957-PA,AAEL003957-PC,AAEL003957-PB	AAEL003957-PA,AAEL003957-PC,AAEL003957-PB	AAEL003957-PA	AAEL003957-PA	AAEL003957-PA	AAEL003957-PA	conserved hypothetical protein protein_coding supercont1.102:781024-820437:-1 gene:AAEL003957	17333.6	7.02
16327	820.362	62.27	62.19	118.472								1060						8	DLDVLMD		PEP_FRAG_2	119	125	b2b5b6°	3	4.492	5.026	0.0043	1	3	820.362	1060	1	1	0.5055	62.2706	62.0523	62.2304	62.3264	62.5045	AAEL006928-PA	AAEL006928-PA	AAEL006928-PA	AAEL006928-PA	AAEL006928-PA	AAEL006928-PA	dihydrolipoamide dehydrogenase protein_coding supercont1.228:1325172-1348931:-1 gene:AAEL006928	54172.8	6.37
16335	820.383	62.24	62.19	112.145	2339	2199	2344	2154			8096	8429						8	QFAIPDF	Pyrrolidone carboxylic acid N-TERM(1)	VAR_MOD	314	320	b6b6*b7y2°y3°y4°y7	7	6.7706	6.7706		1	1	820.383	14098	1	1	0.5055	62.2638	62.038	62.2161	62.3121	62.4902
16380	819.384	14.65	14.66	113.427	1598	1615	3366	2938	10590	10207	11378	11186	2757	2882	5655	12932	12953	12	LADEESR		PEP_FRAG_1	1010	1016	y2y3y6y7	4	7.181	7.181	0	2	2	819.383	17202	1.07	1	0.1998	14.6347	14.4618	14.5972	14.6702	14.8055	AAEL005733-PA	AAEL005733-PA	AAEL005733-PA	AAEL005733-PA	AAEL005733-PA	AAEL005733-PA	myosin heavy chain, nonmuscle or smooth muscle protein_coding supercont1.172:1163891-1178142:1 gene:AAEL005733	187875	5.42
16391	821.433	25.81	26.04	47.982											1872			11	TILMMGR		PEP_FRAG_1	436	442	b4°y3y4y5y7	5	6.4975	6.4975	0.0023	1	2	821.433	1872	1.81	2	0.2785	25.8072	25.6266	25.7687	25.8453	25.9874	AAEL004500-PA,AAEL004500-PB	AAEL004500-PA,AAEL004500-PB	AAEL004500-PA	AAEL004500-PA	AAEL004500-PA	AAEL004500-PA	eukaryotic translation elongation factor protein_coding supercont1.121:1852844-1861602:-1 gene:AAEL004500	95362.5	5.95
16398	821.438	27.29	27.31	117.277	1616	1753	1282				2332	2690						7	EVFDALK		PEP_FRAG_1	33	39	b4°b5b5°b6y3y4y5y7	8	7.517	7.517	0	4	7	821.439	2725	1	1	0.2946	27.3126	27.1316	27.2779	27.3568	27.5031	AAEL009185-PA	AAEL009185-PA	AAEL009185-PA	AAEL009185-PA	AAEL009185-PA	AAEL009185-PA	arginine or creatine kinase protein_coding supercont1.377:1030526-1046490:1 gene:AAEL009185	40216.5	5.95
16399	821.435	27.1	27.33	48.493											1817			11	EVFDALK		PEP_FRAG_1	33	39	y3y4y5y5°	4	6.7785	7.517	0	1	7	821.435	1817	2	2	0.1965	27.0951	26.9178	27.0582	27.1339	27.2744	AAEL009185-PA	AAEL009185-PA	AAEL009185-PA	AAEL009185-PA	AAEL009185-PA	AAEL009185-PA	arginine or creatine kinase protein_coding supercont1.377:1030526-1046490:1 gene:AAEL009185	40216.5	5.95
16408	821.439	40.1	40.06	123.353	9151		2347				6310	6787						3	EVFDALK		PEP_FRAG_2	33	39	b3y4°y7	3	5.9466	7.517	0	1	7	821.438	1931	1	1	0.2746	40.061	39.8145	40.0056	40.1086	40.2997	AAEL009185-PA	AAEL009185-PA	AAEL009185-PA	AAEL009185-PA	AAEL009185-PA	AAEL009185-PA	arginine or creatine kinase protein_coding supercont1.377:1030526-1046490:1 gene:AAEL009185	40216.5	5.95
16411	821.404	41.28	41.27	116.49	2898	3080	2401				3432	3439						7	FGLLEEN		PEP_FRAG_1	430	436	b2b3b4b5b6y1y2y2°y4y4°y7*	11	7.3543	7.3543	0	4	4	821.403	4602	1	1	0.3044	41.2529	41.0333	41.207	41.3007	41.4744	AAEL010590-PA	AAEL010590-PA	AAEL010590-PA	AAEL010590-PA	AAEL010590-PA	AAEL010590-PA	aldose-1-epimerase protein_coding supercont1.488:112025-128922:-1 gene:AAEL010590	47655	5.74
16415	821.437	46.76	46.74	116.55	2849	2627					1344	1374						8	TILMMGR		PEP_FRAG_1	436	442	b4b6°y6	3	4.8392	6.4975	0.0023	1	2	821.437	1586	1	1	0.2768	46.8168	46.5517	46.7604	46.8729	47.0815	AAEL004500-PA,AAEL004500-PB	AAEL004500-PA,AAEL004500-PB	AAEL004500-PA	AAEL004500-PA	AAEL004500-PA	AAEL004500-PA	eukaryotic translation elongation factor protein_coding supercont1.121:1852844-1861602:-1 gene:AAEL004500	95362.5	5.95
16494	823.426	26.17	26.42	47.004											1243			11	FSLDVSR		PEP_FRAG_1	22	28	y3y4y6°	3	6.3558	6.3558	0.0035	1	2	823.426	1243	2	2	0.1571	26.169	26.0224	26.1405	26.2042	26.3224	AAEL010464-PC	AAEL010464-PC	AAEL010464-PC	AAEL010464-PC	AAEL010464-PC	AAEL010464-PC	glutamate dehydrogenase protein_coding supercont1.479:643188-688355:1 gene:AAEL010464	46979.4	6.45
16511	823.412	33.37	33.35	112.387			3139	2797	5175	4950	1029	964	2481	2398	1571	3391	3610	12	FSLDVSR		PEP_FRAG_2	22	28	b3b4°b7°y7	4	5.5587	6.3558	0.0035	1	2	823.412	3175	1	1	0.3175	33.3832	33.1683	33.3372	33.4282	33.5971	AAEL010464-PC	AAEL010464-PC	AAEL010464-PC	AAEL010464-PC	AAEL010464-PC	AAEL010464-PC	glutamate dehydrogenase protein_coding supercont1.479:643188-688355:1 gene:AAEL010464	46979.4	6.45
16585	825.427	13.1	13.03	47.146											2437			11	EVSSYIK		PEP_FRAG_2	173	179	y3y5y7	3	6.5562	6.5562	0.0023	1	2	825.427	2437	1.77	2	0.1942	13.0972	12.9164	13.0614	13.1396	13.2846	AAEL017096-PA,AAEL017301-PA	AAEL017096-PA,AAEL017301-PA	AAEL017096-PA	AAEL017096-PA	AAEL017096-PA	AAEL017096-PA	hypothetical protein protein_coding supercont1.32:3146741-3148132:1 gene:AAEL017096	50815.3	9.44
16587	825.433	13.07	13.15	117.14													1547	13	EVSSYIK		PEP_FRAG_1	173	179	b4b4°y6y7	4	6.2624	6.5562	0.0023	1	2	825.433	1547	1	1	0.2466	13.071	12.8776	13.0304	13.1128	13.2657	AAEL017301-PA,AAEL017096-PA	AAEL017301-PA,AAEL017096-PA	AAEL017096-PA	AAEL017096-PA	AAEL017096-PA	AAEL017096-PA	hypothetical protein protein_coding supercont1.32:3146741-3148132:1 gene:AAEL017096	50815.3	9.44
16588	825.419	18.37	18.43	47.0913											4278	1238	1984	11	SPGVYFR		PEP_FRAG_1	259	265	y4y6	2	6.1102	6.3168	0.0035	1	2	825.42	2931	2	2	0.2283	18.3193	18.1331	18.2824	18.3629	18.5122	AAEL005432-PA,AAEL005432-PB	AAEL005432-PA,AAEL005432-PB	AAEL005432-PA	AAEL005432-PA	AAEL005432-PA	AAEL005432-PA	conserved hypothetical protein protein_coding supercont1.156:203935-218893:-1 gene:AAEL005432	162199	5.24
16598	825.424	33.3	33.31	113.629	10702	10300	8177	7740			8739	8256						3	SPGVYFR		PEP_FRAG_1	259	265	y3y6	2	6.3168	6.3168	0.0035	1	2	825.424	8759	1	1	0.2711	33.3287	33.1203	33.2855	33.3745	33.5397	AAEL005432-PB,AAEL005432-PA	AAEL005432-PB,AAEL005432-PA	AAEL005432-PA	AAEL005432-PA	AAEL005432-PA	AAEL005432-PA	conserved hypothetical protein protein_coding supercont1.156:203935-218893:-1 gene:AAEL005432	162199	5.24
16644	826.376	11.75	11.83	110.859	7111	7097	13815	13801	1792		5758	5542	7227	8131		2558	2819	3	GCVFDTK	Carbamidomethyl C(2)	PEP_FRAG_1	120	126	b2b3b4b5b6b7y2y2°y3y3°y4y4°y5y7	14	7.7125	7.7125	0	8	8	826.376	16424	1.13	1	0.2457	11.688	11.4957	11.6474	11.7292	11.8809	AAEL006483-PA	AAEL006483-PA	AAEL006483-PA	AAEL006483-PA	AAEL006483-PA	AAEL006483-PA	conserved hypothetical protein protein_coding supercont1.208:884895-885924:-1 gene:AAEL006483	19878.1	8.07
16645	826.373	11.69	11.8	44.822											5184			11	MNAFGMR		PEP_FRAG_2	164	170	b3y3y4y7	4	5.2757	5.9905	0.0038	1	3	826.373	5184	1.82	2	0.2344	11.6853	11.4789	11.6442	11.7333	11.8985	AAEL005336-PA	AAEL005336-PA	AAEL005336-PA	AAEL005336-PA	AAEL005336-PA	AAEL005336-PA	d-3-phosphoglycerate dehydrogenase protein_coding supercont1.151:192604-209296:-1 gene:AAEL005336	35744.2	7.91
16748	828.518	31.77	31.68	126.114								1075						8	ADLVILGK		PEP_FRAG_1	115	122	b3b4b5b5°y2y3y4	7	5.9447	6.3589	0.0035	1	4	828.518	1075	1	1	0.2223	31.771	31.5562	31.7313	31.8257	32.0008	AAEL005056-PA	AAEL005056-PA	AAEL005056-PA	AAEL005056-PA	AAEL005056-PA	AAEL005056-PA	electron transfer flavoprotein beta-subunit protein_coding supercont1.140:1408923-1411240:1 gene:AAEL005056	22920.7	9.39
16758	829.361	16.39	16.44	45.64													1055	13	FACFER	Carbamidomethyl C(3)	PEP_FRAG_1	85	90	y1y4y5y6	4	7.0028	7.0028	0	1	2	829.361	1055	1.69	2	0.2886	16.3939	16.1747	16.3482	16.4417	16.6153	AAEL011195-PA	AAEL011195-PA	AAEL011195-PA	AAEL011195-PA	AAEL011195-PA	AAEL011195-PA	mitochondrial phosphate carrier protein protein_coding supercont1.550:968866-969694:-1 gene:AAEL011195	23538.8	9.24
16759	829.362	16.42	16.44	45.837											2009			11	FACFER	Carbamidomethyl C(3)	PEP_FRAG_2	85	90	y3y4	2	6.8211	7.0028	0	1	2	829.362	2009	2	2	0.2361	16.4219	16.2447	16.3874	16.4644	16.6072	AAEL011195-PA	AAEL011195-PA	AAEL011195-PA	AAEL011195-PA	AAEL011195-PA	AAEL011195-PA	mitochondrial phosphate carrier protein protein_coding supercont1.550:968866-969694:-1 gene:AAEL011195	23538.8	9.24
16763	828.517	45.92	45.91	125.085	12880	11660	6927	6076	2407	2763	9995	10450				3226	3405	1	ADLVILGK		PEP_FRAG_1	115	122	b4b4°b5b5°b6b6°b8y1y2y3y4y8	12	6.3589	6.3589	0.0035	3	4	828.518	13790	1	1	0.2452	45.9683	45.7861	45.9298	46.0072	46.1509	AAEL005056-PA	AAEL005056-PA	AAEL005056-PA	AAEL005056-PA	AAEL005056-PA	AAEL005056-PA	electron transfer flavoprotein beta-subunit protein_coding supercont1.140:1408923-1411240:1 gene:AAEL005056	22920.7	9.39
16770	829.416	6.08	6.28	45.16		1664												2	AYDPVHK		PEP_FRAG_2	130	136	y4y5	2	7.1307	7.1307	0	1	2	829.416	1664	1.66	2	0.1973	6.0813	5.9501	6.0584	6.1168	6.2251	AAEL006424-PA	AAEL006424-PA	AAEL006424-PA	AAEL006424-PA	AAEL006424-PA	AAEL006424-PA	37 kDa salivary gland allergen Aed a 2 Precursor (Protein D7)(Allergen Aed a 2) protein_coding supercont1.204:345910-347111:-1 gene:AAEL006424	37465.4	7.72
16771	829.413	6.11	6.28	44.973	1597													1	AYDPVHK		PEP_FRAG_1	130	136	y4y5	2	6.6915	7.1307	0	1	2	829.413	1597	1.68	2	0.1415	6.1102	5.9864	6.0848	6.1379	6.2364	AAEL006424-PA	AAEL006424-PA	AAEL006424-PA	AAEL006424-PA	AAEL006424-PA	AAEL006424-PA	37 kDa salivary gland allergen Aed a 2 Precursor (Protein D7)(Allergen Aed a 2) protein_coding supercont1.204:345910-347111:-1 gene:AAEL006424	37465.4	7.72
16782	829.426	6.53	6.71	45.8127	4388	4840	1645	1509			2938	3065						2	NLFHGNK		PEP_FRAG_1	144	150	b4y4y4*y5y5*y7y7*	7	7.431	7.431	0	3	3	829.427	5409	1.7	2	0.1433	6.4573	6.3137	6.4266	6.4874	6.6003	AAEL006424-PA	AAEL006424-PA	AAEL006424-PA	AAEL006424-PA	AAEL006424-PA	AAEL006424-PA	37 kDa salivary gland allergen Aed a 2 Precursor (Protein D7)(Allergen Aed a 2) protein_coding supercont1.204:345910-347111:-1 gene:AAEL006424	37465.4	7.72
16929	831.492	22.3	22.33	121.179	4040	3547					7400	8871						8	STELLIR		PEP_FRAG_1	58	64	b3b3°b4b5b5°b6y1y3y4y5y7	11	7.0824	7.0824	0	3	3	831.492	14406	1.08	1	0.1904	22.4367	22.2773	22.4035	22.4716	22.5978	AAEL000492-PA,AAEL003685-PA,AAEL003850-PA,AAEL006158-PA,AAEL011424-PA,AAEL000506-PA,AAEL003827-PA,AAEL003852-PA,AAEL012072-PA,AAEL000482-PA,AAEL003659-PA,AAEL003828-PA,AAEL003856-PA,AAEL003836-PA	AAEL000492-PA,AAEL003685-PA,AAEL003850-PA,AAEL006158-PA,AAEL011424-PA,AAEL000506-PA,AAEL003827-PA,AAEL003852-PA,AAEL012072-PA,AAEL000482-PA,AAEL003659-PA,AAEL003828-PA,AAEL003856-PA,AAEL003836-PA	AAEL003827-PA	AAEL003827-PA	AAEL003827-PA	AAEL003827-PA	histone H3 protein_coding supercont1.98:875588-875992:-1 gene:AAEL003827	15175.7	11.56
16950	832.434	39.94	39.94	121.994	9071	8692	3517	3683			6927	6981						2	SYLFFR		PEP_FRAG_1	123	128	b2b3b4y3y6	5	7.2632	7.2632	0	3	4	832.434	8309	1	1	0.3188	39.7748	39.5717	39.7319	39.8183	39.9786	AAEL018102-PA	AAEL018102-PA	AAEL018102-PA	AAEL018102-PA	AAEL018102-PA	AAEL018102-PA	hypothetical protein protein_coding supercont1.115:999082-999569:-1 gene:AAEL018102	16552.5	5.25
16951	832.402	42.77	42.75	120.639	22075	22882	23487	23568	7126	7508	19346	18362	10826	10194	1654	3925	4496	3	EGNPGIFV		PEP_FRAG_2	192	199	b3b4b6y8	4	5.1502	5.1502		1	1	832.402	29384	1.04	1	0.2954	42.7763	42.5992	42.7387	42.8139	42.9534
16962	832.434	41.08	41.06	120.431	2309	2529	6709	6348	6525	5797	2771	3247	4079	4380	2818	4985	5453	4	SYLFFR		PEP_FRAG_1	123	128	b3b4°b5y2y6	5	5.7973	7.2632	0	1	4	832.434	5714	1	1	0.2517	40.9679	40.7177	40.916	41.0228	41.2211	AAEL018102-PA	AAEL018102-PA	AAEL018102-PA	AAEL018102-PA	AAEL018102-PA	AAEL018102-PA	hypothetical protein protein_coding supercont1.115:999082-999569:-1 gene:AAEL018102	16552.5	5.25
16964	832.462	47.38	47.37	122.356		2161	2416	2330			2258	2066						2	DLAICIK	Carbamidomethyl C(5)	PEP_FRAG_1	374	380	b4y3y7	3	4.8687	4.8687	0.0043	1	2	832.462	1723	1	1	0.3042	47.2926	47.0176	47.2327	47.3487	47.5638	AAEL000746-PA	AAEL000746-PA	AAEL000746-PA	AAEL000746-PA	AAEL000746-PA	AAEL000746-PA	NADP-specific isocitrate dehydrogenase protein_coding supercont1.15:4012358-4013587:-1 gene:AAEL000746	46294	6.4
16989	833.366	36.38	36.22	112.693								1790						8	LAEMPADS		PEP_FRAG_2	362	369	b7b8y6	3	5.1346	5.44	0.0038	1	4	833.366	1790	1	1	0.2621	36.377	36.1203	36.3268	36.4381	36.6445	AAEL008787-PA	AAEL008787-PA	AAEL008787-PA	AAEL008787-PA	AAEL008787-PA	AAEL008787-PA	V-type proton ATPase catalytic subunit A (V-ATPase subunit A)(EC 3.6.3.14)(Vacuolar proton pump subunit alpha)(V-ATPase 69 kDa subunit) protein_coding supercont1.349:699238-710948:1 gene:AAEL008787	68571.2	5.08
16990	833.368	42.99	42.99	114.863	4215	4169	2842	2768			2584	2179						2	LAEMPADS		PEP_FRAG_1	362	369	b3y6	2	5.44	5.44	0.0038	1	4	833.368	3436	1	1	0.2499	42.9188	42.6887	42.8689	42.966	43.1461	AAEL008787-PA	AAEL008787-PA	AAEL008787-PA	AAEL008787-PA	AAEL008787-PA	AAEL008787-PA	V-type proton ATPase catalytic subunit A (V-ATPase subunit A)(EC 3.6.3.14)(Vacuolar proton pump subunit alpha)(V-ATPase 69 kDa subunit) protein_coding supercont1.349:699238-710948:1 gene:AAEL008787	68571.2	5.08
16995	833.369	43.6	43.6	115.463	4930	2521	3878	3863			1273	1231						7	LAEMPADS		PEP_FRAG_1	362	369	b5°y6°	2	4.9507	5.44	0.0038	2	4	833.369	1494	1	1	0.259	43.5157	43.3217	43.4751	43.5579	43.7113	AAEL008787-PA	AAEL008787-PA	AAEL008787-PA	AAEL008787-PA	AAEL008787-PA	AAEL008787-PA	V-type proton ATPase catalytic subunit A (V-ATPase subunit A)(EC 3.6.3.14)(Vacuolar proton pump subunit alpha)(V-ATPase 69 kDa subunit) protein_coding supercont1.349:699238-710948:1 gene:AAEL008787	68571.2	5.08
17002	833.395	18.85	18.83	47.8637					1943							3673	3641	12	GVVDSEDL		PEP_FRAG_2	368	375	y4°y7	2	5.2337	5.2896	0.0038	1	2	833.396	3619	2	2	0.251	18.8476	18.6432	18.8059	18.8936	19.0563	AAEL011704-PA	AAEL011704-PA	AAEL011704-PA	AAEL011704-PA	AAEL011704-PA	AAEL011704-PA	heat shock protein protein_coding supercont1.604:23555-25702:1 gene:AAEL011704	81876.7	4.75
17008	833.406	53.35	53.34	118.456	2556	2137	3207	2973			3062	2847						3	LGEWDLT		PEP_FRAG_2	175	181	b4b4°y2°y5°	4	4.503	6.0864	0.0036	1	3	833.408	2547	1	1	0.2574	53.3741	53.1168	53.3195	53.4288	53.6316	AAEL006674-PA	AAEL006674-PA	AAEL006674-PA	AAEL006674-PA	AAEL006674-PA	AAEL006674-PA	Clip-Domain Serine Protease family B. protein_coding supercont1.216:1671869-1673116:1 gene:AAEL006674	42897.5	5.04
17012	833.395	38.62	38.61	114.874			1933	2140	2150	2165	2793	2456				1806	1934	6	GVVDSEDL		PEP_FRAG_2	368	375	y3°y6y8	3	5.2896	5.2896	0.0038	1	2	833.395	1289	1	1	0.3515	38.5107	38.3201	38.4721	38.554	38.706	AAEL011704-PA	AAEL011704-PA	AAEL011704-PA	AAEL011704-PA	AAEL011704-PA	AAEL011704-PA	heat shock protein protein_coding supercont1.604:23555-25702:1 gene:AAEL011704	81876.7	4.75
17014	833.403	61.59	61.55	114.222	14407	13612	13970	14515	3190	2982	10989	10595						7	LGEWDLT		PEP_FRAG_2	175	181	b2b3y6°y7	4	5.8207	6.0864	0.0036	1	3	833.403	19683	1	1	0.2493	61.5804	61.3762	61.5365	61.6229	61.7832	AAEL006674-PA	AAEL006674-PA	AAEL006674-PA	AAEL006674-PA	AAEL006674-PA	AAEL006674-PA	Clip-Domain Serine Protease family B. protein_coding supercont1.216:1671869-1673116:1 gene:AAEL006674	42897.5	5.04
17074	834.389	37.95	37.92	115.754	6627	6568	10855	10802	1690	1763	3899	3918	6207	5571		1443	1792	1	QWSGFAR	Pyrrolidone carboxylic acid N-TERM(1)	VAR_MOD	298	304	b3b4°b7y1y3y7	6	5.0558	5.0558	0.0043	2	2	834.388	6534	1	1	0.2478	37.9692	37.783	37.9313	38.0112	38.1595	AAEL010661-PA	AAEL010661-PA	AAEL010661-PA	AAEL010661-PA	AAEL010661-PA	AAEL010661-PA	phospholipid scramblase 1, protein_coding supercont1.495:557014-585563:-1 gene:AAEL010661	38862.7	4.93
17140	835.49	41.29	41.29	123.211	2059	1835	3140	2637			2750	2902						8	LLDYLAK		PEP_FRAG_1	48	54	b2b3b3°y1y4y7	6	5.4764	5.4764	0.0038	2	2	835.488	3494	1	1	0.2535	41.4256	41.2394	41.3858	41.4647	41.6111	AAEL010338-PA	AAEL010338-PA	AAEL010338-PA	AAEL010338-PA	AAEL010338-PA	AAEL010338-PA	conserved hypothetical protein protein_coding supercont1.472:773358-774183:-1 gene:AAEL010338	28678.5	4.53
17204	837.438	29.48	29.49	123.812	1750	1787					2586	2574						1	EVYLAKD		PEP_FRAG_2	69	75	b3b7y3y4y5y7	6	7.0689	7.0689		1	1	837.438	1565	1	1	0.2895	29.5222	29.2324	29.4604	29.5834	29.8114
17272	838.427	15.97	15.98	121.972	5576	5710					4071							1	SFLTENK		PEP_FRAG_1	245	251	b2b3b3°b4b4°b6b7y1y3y3°y4y4*y5y5°y6y7	16	7.4329	7.4329	0	2	2	838.428	6470	1.35	1	0.2768	15.9477	15.6695	15.8876	16.0051	16.2231	AAEL004734-PA	AAEL004734-PA	AAEL004734-PA	AAEL004734-PA	AAEL004734-PA	AAEL004734-PA	conserved hypothetical protein protein_coding supercont1.128:671329-672630:-1 gene:AAEL004734	48526.6	5.06
17398	841.413	16.92	16.89	48.952	2379	2859	1650				988	946						7	VFFGSER		PEP_FRAG_2	74	80	b6°y5y6°y7	4	5.3152	6.1385	0.0038	1	3	841.411	1113	1.51	2	0.1985	16.9447	16.7449	16.9012	16.9855	17.1418	AAEL001690-PA	AAEL001690-PA	AAEL001690-PA	AAEL001690-PA	AAEL001690-PA	AAEL001690-PA	serine-type enodpeptidase, protein_coding supercont1.39:1627183-1627975:-1 gene:AAEL001690	27391.5	4.61
17400	841.416	22.24	22.26	116.578	3027	3602	2426	2064			7285	7778						8	VFFGSER		PEP_FRAG_1	74	80	y5°y6y7	3	6.1385	6.1385	0.0038	2	3	841.415	12276	1	1	0.2435	22.3275	22.139	22.2883	22.3688	22.5181	AAEL001690-PA	AAEL001690-PA	AAEL001690-PA	AAEL001690-PA	AAEL001690-PA	AAEL001690-PA	serine-type enodpeptidase, protein_coding supercont1.39:1627183-1627975:-1 gene:AAEL001690	27391.5	4.61
17545	843.474	53.56	53.54	118.14					9605	8168	1223	1117	3065	2481	19805		24929	11	QMSLLLR	Pyrrolidone carboxylic acid N-TERM(1)	VAR_MOD	321	327	b4b4°b5b5*y1y2y3y5y7	9	7.1724	7.1724		1	1	843.474	21484	1.07	1	0.2667	53.4056	53.2456	53.3724	53.4407	53.5675
17546	843.471	55.43	55.42	120.648	2634	2599	6813	7026			2439	2798						4	IGVALELE		PEP_FRAG_2	274	281	b4b5y3	3	7.0848	7.0848	0	4	6	843.471	6561	1	1	0.2769	55.3458	55.169	55.3135	55.3914	55.5359	AAEL001872-PA	AAEL001872-PA	AAEL001872-PA	AAEL001872-PA	AAEL001872-PA	AAEL001872-PA	voltage-dependent anion-selective channel protein_coding supercont1.44:690107-695296:-1 gene:AAEL001872	30810.3	8.87
17596	844.5	9.05	9.19	48.4787	1734	1822					3955	4117						7	RVTIMPK		PEP_FRAG_1	117	123	b3b4b5y1y2y4y6y7	8	6.6669	6.6669	0.0009	4	4	844.501	4949	2	2	0.1967	9.2135	9.0317	9.1761	9.254	9.3984	AAEL003827-PA,AAEL003850-PA,AAEL006158-PA,AAEL000492-PA,AAEL000506-PA,AAEL003828-PA,AAEL003852-PA,AAEL011424-PA,AAEL003659-PA,AAEL003836-PA,AAEL003856-PA,AAEL012072-PA,AAEL000482-PA,AAEL003685-PA,AAEL018013-PA	AAEL003827-PA,AAEL003850-PA,AAEL006158-PA,AAEL000492-PA,AAEL000506-PA,AAEL003828-PA,AAEL003852-PA,AAEL011424-PA,AAEL003659-PA,AAEL003836-PA,AAEL003856-PA,AAEL012072-PA,AAEL000482-PA,AAEL003685-PA,AAEL018013-PA	AAEL003827-PA	AAEL003827-PA	AAEL003827-PA	AAEL003827-PA	histone H3 protein_coding supercont1.98:875588-875992:-1 gene:AAEL003827	15175.7	11.56
17597	844.493	6.97	7.18	49.1294	1465	1506	1372	1451			1312	1123				1725	2391	8	TRLEVAR		MISSING_CLEAVAGE	203	209	b5y1y5y7	4	6.4825	6.4825	0.0023	3	3	844.494	1172	2	2	0.1683	7.1229	6.9542	7.0834	7.153	7.2822	AAEL013775-PA	AAEL013775-PA	AAEL013775-PA	AAEL013775-PA	AAEL013775-PA	AAEL013775-PA	conserved hypothetical protein protein_coding supercont1.918:67299-68208:-1 gene:AAEL013775	31656.2	4.71
17599	844.487	27.76	27.76	126.485					2577	2435					5883	17896	16887	13	LQVQAASK		PEP_FRAG_1	25	32	b2b2*b3b4b5b5*b6b6*b7b8b8*b8°y2y3y4y4°y5y5*y5°y6y6*y7y8	23	7.494	7.494	0	2	2	844.488	30609	1.15	1	0.2587	27.7251	27.5512	27.6882	27.7621	27.8991	AAEL014127-PA,AAEL004855-PA	AAEL014127-PA,AAEL004855-PA
17609	845.381	19.62	19.64	120.326	3680	4486	2006	2142			2701	2949						1	YAWYDK		PEP_FRAG_1	182	187	b3y2y3y4y5y6	6	8.3785	8.3785	0	5	5	845.381	3785	1.37	1	0.2705	19.6191	19.4161	19.5752	19.661	19.8201	AAEL000749-PA	AAEL000749-PA	AAEL000749-PA	AAEL000749-PA	AAEL000749-PA	AAEL000749-PA	conserved hypothetical protein protein_coding supercont1.15:2852946-2853941:1 gene:AAEL000749	33496.7	5.67
17618	845.424	15.83	15.83	49.2337	3899	3008	5167	5622			3196	3364						3	HEWFVK		PEP_FRAG_1	132	137	b2b3°b4y1y2y4	6	7.1304	7.1304	0	5	5	845.423	4863	1.95	2	0.247	15.7914	15.5454	15.7399	15.8448	16.0394	AAEL003434-PA	AAEL003434-PA	AAEL003434-PA	AAEL003434-PA	AAEL003434-PA	AAEL003434-PA	alpha-amylase protein_coding supercont1.86:770929-772866:-1 gene:AAEL003434	68698.6	5.13
17625	845.411	29.61	29.63	111.849													1399	13	DPPNFQK		PEP_FRAG_1	131	137	b3°b7*b7°y1y6y7y7*	7	5.8757	6.1371	0.0036	1	2	845.411	1399	1	1	0.2354	29.6063	29.3722	29.5577	29.6576	29.8431	AAEL005432-PB,AAEL005432-PA	AAEL005432-PB,AAEL005432-PA	AAEL005432-PA	AAEL005432-PA	AAEL005432-PA	AAEL005432-PA	conserved hypothetical protein protein_coding supercont1.156:203935-218893:-1 gene:AAEL005432	162199	5.24
17661	845.495	41.95	41.84	118.09								1087						8	ELVTALSI		PEP_FRAG_1	515	522	b2b3b8y5	4	6.8029	6.8029	0.0005	1	2	845.495	1087	1	1	0.2039	41.9468	41.7514	41.9121	41.9987	42.1593	AAEL003734-PA	AAEL003734-PA	AAEL003734-PA	AAEL003734-PA	AAEL003734-PA	AAEL003734-PA	aconitase, mitochondrial protein_coding supercont1.95:2766128-2774361:-1 gene:AAEL003734	88189.3	8.47
17710	846.469	38.44	38.44	119.225							5923							7	VGAGAPVYL		PEP_FRAG_1	43	51	b4b7y2y4	4	6.865	6.865	0.0005	1	2	846.469	5923	1	1	0.2833	38.4443	38.1624	38.3856	38.5059	38.729	AAEL000525-PA,AAEL003669-PA,AAEL003687-PA,AAEL003862-PA,AAEL007005-PA,AAEL000518-PA,AAEL003820-PA,AAEL003826-PA,AAEL003851-PA,AAEL000494-PA,AAEL000497-PA,AAEL003706-PA,AAEL003818-PA	AAEL000525-PA,AAEL003669-PA,AAEL003687-PA,AAEL003862-PA,AAEL007005-PA,AAEL000518-PA,AAEL003820-PA,AAEL003826-PA,AAEL003851-PA,AAEL000494-PA,AAEL000497-PA,AAEL003706-PA,AAEL003818-PA	AAEL000494-PA	AAEL000494-PA	AAEL000494-PA	AAEL000494-PA	histone H2A protein_coding supercont1.9:3666585-3666959:1 gene:AAEL000494	13362.7	11.15
17719	846.469	46.57	46.56	118.552	2623	2431	5160	5815			1839	2402						3	VGAGAPVYL		PEP_FRAG_1	43	51	b3b5	2	5.0765	6.865	0.0005	1	2	846.469	4666	1	1	0.18	46.5957	46.4165	46.5583	46.6348	46.7766	AAEL000497-PA,AAEL003706-PA,AAEL003818-PA,AAEL003820-PA,AAEL003826-PA,AAEL000494-PA,AAEL003669-PA,AAEL003687-PA,AAEL007005-PA,AAEL000518-PA,AAEL000525-PA,AAEL003851-PA,AAEL003862-PA	AAEL000497-PA,AAEL003706-PA,AAEL003818-PA,AAEL003820-PA,AAEL003826-PA,AAEL000494-PA,AAEL003669-PA,AAEL003687-PA,AAEL007005-PA,AAEL000518-PA,AAEL000525-PA,AAEL003851-PA,AAEL003862-PA	AAEL000494-PA	AAEL000494-PA	AAEL000494-PA	AAEL000494-PA	histone H2A protein_coding supercont1.9:3666585-3666959:1 gene:AAEL000494	13362.7	11.15
17752	847.463	17.42	17.43	48.2817	6336	7036	4609	4385			4420	4412						2	VPALYER		PEP_FRAG_1	107	113	y1y2°y3y4y5y6y7	7	7.9981	7.9981	0	6	6	847.465	7351	1.81	2	0.1944	17.4027	17.2245	17.3677	17.445	17.5882	AAEL000749-PA	AAEL000749-PA	AAEL000749-PA	AAEL000749-PA	AAEL000749-PA	AAEL000749-PA	conserved hypothetical protein protein_coding supercont1.15:2852946-2853941:1 gene:AAEL000749	33496.7	5.67
17774	847.458	48.87	48.85	122.097	2878	2456	2050	1907			2786	2374						2	QLVPIYD		PEP_FRAG_1	404	410	b3y4°y7	3	5.9831	5.9831	0.0038	4	4	847.458	1957	1	1	0.3356	48.7995	48.4639	48.7282	48.8708	49.1351	AAEL000641-PB,AAEL000641-PA	AAEL000641-PB,AAEL000641-PA	AAEL000641-PA	AAEL000641-PA	AAEL000641-PA	AAEL000641-PA	protein disulfide isomerase protein_coding supercont1.13:668270-683719:-1 gene:AAEL000641	56295.7	4.76
17846	848.479	35.28	35.41	46.958											3021			11	GLFVIDGK		PEP_FRAG_2	122	129	b3b4y4y6y8	5	6.8818	7.1803	0	1	11	848.479	3021	1.8	2	0.2196	35.2805	35.1106	35.2451	35.3175	35.452	AAEL004112-PA	AAEL004112-PA	AAEL004112-PA	AAEL004112-PA	AAEL004112-PA	AAEL004112-PA	Thioredoxin Peroxidase. protein_coding supercont1.107:2094566-2095144:-1 gene:AAEL004112	21608.6	5.57
17851	848.488	35.45	35.45	124.754		1246	1908	2031			1760	1360				1534	1884	4	GLFVIDGK		PEP_FRAG_1	122	129	b3b4y3y4y6y8	6	7.1803	7.1803	0	7	11	848.486	1575	1	1	0.2025	35.3865	35.191	35.3505	35.4365	35.5961	AAEL004112-PA	AAEL004112-PA	AAEL004112-PA	AAEL004112-PA	AAEL004112-PA	AAEL004112-PA	Thioredoxin Peroxidase. protein_coding supercont1.107:2094566-2095144:-1 gene:AAEL004112	21608.6	5.57
17965	850.518	15.96	15.98	49.7567	3178	2951	2037	1894			6542	6126						7	HLQLAIR		PEP_FRAG_1	82	88	b2b5*b6y3y4y5y6y7	8	7.1196	7.1196	0	5	5	850.52	10116	1.92	2	0.2373	15.9908	15.76	15.9455	16.0455	16.231	AAEL000497-PA,AAEL003669-PA,AAEL003706-PA,AAEL003820-PA,AAEL003851-PA,AAEL007609-PA,AAEL000494-PA,AAEL000518-PA,AAEL003818-PA,AAEL003826-PA,AAEL003862-PA,AAEL000525-PA,AAEL003687-PA,AAEL007005-PA,AAEL000303-PA	AAEL000497-PA,AAEL003669-PA,AAEL003706-PA,AAEL003820-PA,AAEL003851-PA,AAEL007609-PA,AAEL000494-PA,AAEL000518-PA,AAEL003818-PA,AAEL003826-PA,AAEL003862-PA,AAEL000525-PA,AAEL003687-PA,AAEL007005-PA,AAEL000303-PA
17973	851.413	18.72	18.84	45.274											7184			11	NTQFWR		PEP_FRAG_1	109	114	b4y1y4*y6	4	7.2106	7.3371	0	1	3	851.413	7184	1.88	2	0.2036	18.7173	18.5153	18.6733	18.7585	18.9165	AAEL004855-PA,AAEL014127-PA	AAEL004855-PA,AAEL014127-PA
17974	851.413	18.76	18.82	115.648													3392	13	NTQFWR		PEP_FRAG_2	109	114	b2b3b6y1y5*y6	6	7.1887	7.3371	0	1	3	851.413	3392	1.25	1	0.2353	18.7571	18.5648	18.717	18.7991	18.9513	AAEL004855-PA,AAEL014127-PA	AAEL004855-PA,AAEL014127-PA
17975	851.417	18.84	18.83	116.023												2549		12	NTQFWR		PEP_FRAG_1	109	114	b3b4°y2y3y4y6	6	7.3371	7.3371	0	1	3	851.417	2549	1.25	1	0.3052	18.845	18.6397	18.8029	18.8909	19.0541	AAEL004855-PA,AAEL014127-PA	AAEL004855-PA,AAEL014127-PA
18105	853.513	37.61	37.58	117.501			1468	1654	9824	9353	2104	1587	5450	4788	10557	12932	13051	13	QLIVGVNK	Pyrrolidone carboxylic acid N-TERM(1)	VAR_MOD	147	154	b3b4b5b6y1y2y2*y3y4y5y5*y6y8	13	7.9354	7.9354	0	5	5	853.513	21901	1	1	0.2684	37.5553	37.403	37.5237	37.5887	37.7093	AAEL017096-PA,AAEL017301-PA	AAEL017096-PA,AAEL017301-PA	AAEL017096-PA	AAEL017096-PA	AAEL017096-PA	AAEL017096-PA	hypothetical protein protein_coding supercont1.32:3146741-3148132:1 gene:AAEL017096	50815.3	9.44
18235	856.485	11.62	11.82	122.246													1154	13	TAVAPIER		PEP_FRAG_1	27	34	y4y6y8	3	7.233	7.7653	0	1	2	856.485	1154	1.39	1	0.216	11.6231	11.4593	11.5923	11.664	11.797	AAEL004855-PA,AAEL010884-PA	AAEL004855-PA,AAEL010884-PA
18236	856.485	11.62	11.73	48.466											4284			11	TAVAPIER		PEP_FRAG_1	27	34	b2b3y1y4y8	5	7.7653	7.7653	0	1	2	856.485	4284	1.91	2	0.205	11.6231	11.4271	11.5841	11.6686	11.8256	AAEL004855-PA,AAEL010884-PA	AAEL004855-PA,AAEL010884-PA
18241	856.498	19.34	19.35	117.73					2219	2209						5251	5231	13	GNLANVIR		PEP_FRAG_1	76	83	b3b6y2y3y4y4*y5y8y8*	9	8.5219	8.5219	0	2	3	856.498	7112	1.11	1	0.2829	19.2555	19.0781	19.219	19.295	19.436	AAEL004855-PA	AAEL004855-PA	AAEL004855-PA	AAEL004855-PA	AAEL004855-PA	AAEL004855-PA	ADP,ATP carrier protein protein_coding supercont1.132:1668937-1682495:1 gene:AAEL004855	33237.4	9.96
18242	856.498	19.17	19.34	47.642											13741			11	GNLANVIR		PEP_FRAG_1	76	83	b2b2*b3b3*b4*y3y4y4*y5*y6y8	11	7.421	8.5219	0	1	3	856.498	13741	1.84	2	0.199	19.1712	18.9772	19.1316	19.2148	19.3692	AAEL004855-PA	AAEL004855-PA	AAEL004855-PA	AAEL004855-PA	AAEL004855-PA	AAEL004855-PA	ADP,ATP carrier protein protein_coding supercont1.132:1668937-1682495:1 gene:AAEL004855	33237.4	9.96
18367	858.524	38.91	38.93	47.6697	6777	7158	3445	3812			9253	9404			5128	1902	1874	8	ISLLGLDK		PEP_FRAG_1	745	752	b2b3°b5b5°b6y2y2°y3y3°y4y4°y5y6y7y7°y8	16	8.2905	8.2905	0	9	9	858.527	15892	1.53	2	0.2349	39.0825	38.8971	39.0435	39.1225	39.2689	AAEL003734-PA,AAEL012897-PA	AAEL003734-PA,AAEL012897-PA	AAEL003734-PA	AAEL003734-PA	AAEL003734-PA	AAEL003734-PA	aconitase, mitochondrial protein_coding supercont1.95:2766128-2774361:-1 gene:AAEL003734	88189.3	8.47
18369	858.523	26.46	26.49	46.9634	3708	3510	2268	2132	2604	3386		4004			9277	3564	3612	2	VADILTVK		PEP_FRAG_1	271	278	b4b5b6b6°y1y3y4y5y6y7	10	8.0511	8.0511	0	9	10	858.525	2922	1.58	2	0.2092	26.2768	26.0858	26.2357	26.3166	26.4665	AAEL012897-PA,AAEL003734-PA	AAEL012897-PA,AAEL003734-PA	AAEL003734-PA	AAEL003734-PA	AAEL003734-PA	AAEL003734-PA	aconitase, mitochondrial protein_coding supercont1.95:2766128-2774361:-1 gene:AAEL003734	88189.3	8.47
18370	858.524	26.49	26.49	125.58							6251							7	VADILTVK		PEP_FRAG_2	271	278	b2b3b4b5b6b6°b8y4y5y6y7y8	12	8.0399	8.0511	0	1	10	858.524	6251	1.52	1	0.213	26.4864	26.3204	26.4533	26.5249	26.6578	AAEL003734-PA,AAEL012897-PA	AAEL003734-PA,AAEL012897-PA	AAEL003734-PA	AAEL003734-PA	AAEL003734-PA	AAEL003734-PA	aconitase, mitochondrial protein_coding supercont1.95:2766128-2774361:-1 gene:AAEL003734	88189.3	8.47
18395	859.47	23.09	23.29	48.896		1064												2	DLLSANVK		PEP_FRAG_2	100	107	b7*y6°	2	5.2098	5.2098	0.0043	1	2	859.47	1064	1.61	2	0.2112	23.0891	22.8965	23.0485	23.1305	23.2824	AAEL007707-PA	AAEL007707-PA	AAEL007707-PA	AAEL007707-PA	AAEL007707-PA	AAEL007707-PA	malate dehydrogenase protein_coding supercont1.275:935176-952474:-1 gene:AAEL007707	36491.9	5.97
18412	859.441	39.13	39.12	118.018	2363	2164	2578	2443			3079	3127						2	VALTQVDN		PEP_FRAG_2	285	292	y3°y4*y5°y7°y8	5	4.7085	4.7085	0.0043	1	3	859.442	1738	1	1	0.361	39.0109	38.802	38.9786	39.0739	39.2505	AAEL005722-PA	AAEL005722-PA	AAEL005722-PA	AAEL005722-PA	AAEL005722-PA	AAEL005722-PA	60S ribosomal protein L7a protein_coding supercont1.171:194630-198912:1 gene:AAEL005722	39518.7	10.67
18416	859.445	40.57	40.52	123.595	1764		1601	1598			1407	1463						7	VALTQVDN		PEP_FRAG_2	285	292	b5b6*y3°y8*	4	4.5351	4.7085	0.0043	1	3	859.446	1644	1	1	0.2806	40.5233	40.2643	40.4723	40.5845	40.7925	AAEL005722-PA	AAEL005722-PA	AAEL005722-PA	AAEL005722-PA	AAEL005722-PA	AAEL005722-PA	60S ribosomal protein L7a protein_coding supercont1.171:194630-198912:1 gene:AAEL005722	39518.7	10.67
18454	860.469	35.46	35.43	119.286			1604	2139			1791	2048						8	VGASEATLL		PEP_FRAG_1	167	175	b5b6b9°y7°y9	5	5.5343	5.5343	0.0038	1	3	860.468	2321	1	1	0.3521	35.5288	35.1821	35.4595	35.609	35.8863	AAEL010821-PA	AAEL010821-PA	AAEL010821-PA	AAEL010821-PA	AAEL010821-PA	AAEL010821-PA	60S acidic ribosomal protein P0 protein_coding supercont1.510:444590-445799:1 gene:AAEL010821	33890	5.3
18459	860.481	35.61	35.61	48.6307	3608	2462					1879	1899						1	VLCLSVAV	Carbamidomethyl C(3)	PEP_FRAG_2	162	169	b7y4y6y7	4	6.4346	6.4346	0.0029	1	2	860.48	3145	1.72	2	0.2716	35.6536	35.4496	35.6086	35.6943	35.8533	AAEL013221-PC	AAEL013221-PC	AAEL013221-PC	AAEL013221-PC	AAEL013221-PC	AAEL013221-PC	60S ribosomal protein L10a protein_coding supercont1.808:243305-244507:-1 gene:AAEL013221	24838.4	10.26
18475	860.458	56.65	56.48	84.362										2504				10	VGASEATLL		PEP_FRAG_2	167	175	b8y7°	2	3.9368	5.5343	0.0038	1	3	860.458	2504	1	1	0.2297	56.6457	56.4184	56.5983	56.6953	56.8753	AAEL010821-PA	AAEL010821-PA	AAEL010821-PA	AAEL010821-PA	AAEL010821-PA	AAEL010821-PA	60S acidic ribosomal protein P0 protein_coding supercont1.510:444590-445799:1 gene:AAEL010821	33890	5.3
18507	860.441	44.86	44.86	121.662			9257	8754	4560	3490	2033	3013	3484	2755	1994	3810	3568	8	EDVISAQV		PEP_FRAG_2	313	320	b3°y6°y8	3	4.9683	5.2336	0.0043	1	2	860.441	3729	1.07	1	0.2824	44.968	44.7201	44.9089	45.0108	45.1996	AAEL009658-PB,AAEL009658-PA,AAEL009658-PC	AAEL009658-PB,AAEL009658-PA,AAEL009658-PC	AAEL009658-PB	AAEL009658-PB	AAEL009658-PB	AAEL009658-PB	alpha,alpha-trehalase protein_coding supercont1.416:220712-250040:-1 gene:AAEL009658	67353.2	4.99
18510	860.443	44.7	44.79	113.407													3081	13	EDVISAQV		PEP_FRAG_2	313	320	y5°y6y8y8*	4	5.2336	5.2336	0.0043	1	2	860.443	3081	1	1	0.2911	44.6997	44.5029	44.6592	44.7435	44.8999	AAEL009658-PA,AAEL009658-PB,AAEL009658-PC	AAEL009658-PA,AAEL009658-PB,AAEL009658-PC	AAEL009658-PB	AAEL009658-PB	AAEL009658-PB	AAEL009658-PB	alpha,alpha-trehalase protein_coding supercont1.416:220712-250040:-1 gene:AAEL009658	67353.2	4.99
18512	861.424	19.71	19.73	116.547	6789	6594	5583	5216	14947	13833	13659	14372						7	CLLDQGR	Carbamidomethyl C(1)	PEP_FRAG_1	46	52	b2y1y5y5*y6y7	6	6.3689	6.3689	0.0035	2	3	861.425	24942	1.24	1	0.3943	19.7311	19.5182	19.6891	19.7812	19.9521	AAEL001964-PA	AAEL001964-PA	AAEL001964-PA	AAEL001964-PA	AAEL001964-PA	AAEL001964-PA	protein serine/threonine kinase, putative protein_coding supercont1.47:2447955-2448335:1 gene:AAEL001964	14777.8	8.57
18517	861.413	23.68	23.69	120.578	3118	2685	4873	4602			3486	3765	4465	4254			1240	8	CLLDQGR	Carbamidomethyl C(1)	PEP_FRAG_2	46	52	b6b7y4y7	4	5.2947	6.3689	0.0035	1	3	861.414	4919	1.3	1	0.2218	23.699	23.5307	23.6621	23.733	23.8644	AAEL001964-PA	AAEL001964-PA	AAEL001964-PA	AAEL001964-PA	AAEL001964-PA	AAEL001964-PA	protein serine/threonine kinase, putative protein_coding supercont1.47:2447955-2448335:1 gene:AAEL001964	14777.8	8.57
18558	861.503	17.19	17.18	125.129	2035	2175	1774				1556	1738						7	SSSILQVK		PEP_FRAG_1	44	51	b4b5b6b6°y3*y4y8	7	6.8746	6.8746	0.0005	3	3	861.504	1755	1.25	1	0.2191	17.1827	16.9733	17.139	17.2284	17.3942	AAEL005428-PA	AAEL005428-PA	AAEL005428-PA	AAEL005428-PA	AAEL005428-PA	AAEL005428-PA	conserved hypothetical protein protein_coding supercont1.155:26336-27164:1 gene:AAEL005428	12970.1	10.08
18591	862.451	19.2	19.22	48.084					2277	2449					5123	3387	3635	12	NLFHGFK		PEP_FRAG_1	95	101	b2b5y3y4y5y6y7y7*	8	6.4433	6.4433	0.0029	2	2	862.451	3209	1.86	2	0.3741	19.2902	19.0518	19.2431	19.3462	19.5376	AAEL011184-PA,AAEL010818-PA	AAEL011184-PA,AAEL010818-PA	AAEL011184-PA	AAEL011184-PA	AAEL011184-PA	AAEL011184-PA	mitochondrial phosphate carrier protein protein_coding supercont1.550:949035-951370:-1 gene:AAEL011184	39075.5	8.74
18614	862.499	36.76	36.83	123.625				1242										4	LIFDNLK		PEP_FRAG_1	780	786	y1y3y5y7	4	7.2069	7.2069	0	1	2	862.499	1242	1.37	1	0.2537	36.7631	36.5527	36.7116	36.7973	36.9563	AAEL012062-PA,AAEL012062-PB	AAEL012062-PA,AAEL012062-PB	AAEL012062-PB	AAEL012062-PB	AAEL012062-PB	AAEL012062-PB	Na /K ATPase alpha subunit protein_coding supercont1.650:473391-547252:1 gene:AAEL012062	115852	5.34
18617	862.5	53.84	53.88	127.645			1578			1965							2363	6	LIFDNLK		PEP_FRAG_2	780	786	b5b6°b7b7°	4	5.5858	7.2069	0	1	2	862.504	1194	1.25	1	0.3045	53.8066	53.5867	53.7546	53.8451	54.0131	AAEL012062-PB,AAEL012062-PA	AAEL012062-PB,AAEL012062-PA	AAEL012062-PB	AAEL012062-PB	AAEL012062-PB	AAEL012062-PB	Na /K ATPase alpha subunit protein_coding supercont1.650:473391-547252:1 gene:AAEL012062	115852	5.34
18642	863.472	24.52	24.51	124.571					6182	7041						8129	8370	13	GAFSNVLR		PEP_FRAG_1	276	283	b5°b6b6*b8b8°y1y2y3y4*y5y6y6°y8	13	8.4688	8.4688	0	4	5	863.472	13484	1.07	1	0.21	24.4221	24.2166	24.3771	24.4637	24.6242	AAEL004855-PA,AAEL010884-PA	AAEL004855-PA,AAEL010884-PA
18643	863.474	24.24	24.46	48.717											20729			11	GAFSNVLR		PEP_FRAG_1	276	283	b3b4°y1y2y3y4y5*y7°y8	9	7.3014	8.4688	0	1	5	863.474	20729	1.76	2	0.2162	24.2417	24.0349	24.1977	24.2855	24.4484	AAEL010884-PA,AAEL004855-PA	AAEL010884-PA,AAEL004855-PA
18682	864.446	14.18	14.2	122.281	3477	3926	1907	2129			3722	3089						1	AYPSLGEK		PEP_FRAG_1	97	104	b4°b7b8y3y6y6°y8	7	7.9024	7.9024	0	5	5	864.445	3745	1	1	0.2465	14.1638	13.9271	14.116	14.2179	14.4068	AAEL006424-PA	AAEL006424-PA	AAEL006424-PA	AAEL006424-PA	AAEL006424-PA	AAEL006424-PA	37 kDa salivary gland allergen Aed a 2 Precursor (Protein D7)(Allergen Aed a 2) protein_coding supercont1.204:345910-347111:-1 gene:AAEL006424	37465.4	7.72
18735	865.386	24.6	24.65	118.849													2511	13	WISSQMN		PEP_FRAG_1	222	228	b2b3b5	3	6.0745	6.0745	0.0038	1	3	865.386	2511	1	1	0.2548	24.5989	24.4285	24.5678	24.6429	24.7821	AAEL018664-PA	AAEL018664-PA	AAEL018664-PA	AAEL018664-PA	AAEL018664-PA	AAEL018664-PA	Cytochrome c oxidase subunit 2 protein_coding Mt:2903-3587:1 gene:AAEL018664	26613.3	5.28
18736	865.388	24.65	24.63	118.984												2298		12	WISSQMN		PEP_FRAG_1	222	228	b5b6y3y7	4	5.7124	6.0745	0.0038	1	3	865.388	2298	1	1	0.2389	24.6534	24.5117	24.6353	24.7019	24.8254	AAEL018664-PA	AAEL018664-PA	AAEL018664-PA	AAEL018664-PA	AAEL018664-PA	AAEL018664-PA	Cytochrome c oxidase subunit 2 protein_coding Mt:2903-3587:1 gene:AAEL018664	26613.3	5.28
18791	865.496	25.47	25.51	47.1016					2149	2038					9980	4630	4766	13	TVELLYK		PEP_FRAG_1	91	97	b3b4b6°y2y3y4y5y6y7	9	7.5941	7.5941	0	5	5	865.496	6309	1.58	2	0.2745	25.443	25.2772	25.4097	25.4811	25.6136	AAEL011195-PA	AAEL011195-PA	AAEL011195-PA	AAEL011195-PA	AAEL011195-PA	AAEL011195-PA	mitochondrial phosphate carrier protein protein_coding supercont1.550:968866-969694:-1 gene:AAEL011195	23538.8	9.24
18965	869.399	25.36	25.35	123.638	1193													1	SGGNLGTTY		PEP_FRAG_1	332	340	b8y4y6*	3	5.7374	6.0645	0.0036	1	2	869.399	1193	1.38	1	0.2605	25.356	25.1231	25.3092	25.4095	25.5956	AAEL000044-PA,AAEL000044-PB	AAEL000044-PA,AAEL000044-PB	AAEL000044-PA	AAEL000044-PA	AAEL000044-PA	AAEL000044-PA	ornithine decarboxylase protein_coding supercont1.1:5119073-5120411:-1 gene:AAEL000044	47263.6	6.63
18973	869.382	23.53	23.54	119.764	24980	26331	37042	38986	8289	9636	21557	20120	25543	26442	5423	5656	5569	2	SGGNLGTTY		PEP_FRAG_2	332	340	b8b9y7y9y9*	5	6.0645	6.0645	0.0036	1	2	869.381	31512	1	1	0.222	23.4286	23.2753	23.3978	23.4639	23.5864	AAEL000044-PA,AAEL000044-PB	AAEL000044-PA,AAEL000044-PB	AAEL000044-PA	AAEL000044-PA	AAEL000044-PA	AAEL000044-PA	ornithine decarboxylase protein_coding supercont1.1:5119073-5120411:-1 gene:AAEL000044	47263.6	6.63
19035	870.525	26.82	26.77	125.955												1370		12	LITIPDAK		PEP_FRAG_1	319	326	b3y2y4y6y8	5	6.8184	7.2567	0	1	3	870.525	1370	1.29	1	0.2184	26.8163	26.6234	26.7762	26.8586	27.0114	AAEL014734-PA	AAEL014734-PA	AAEL014734-PA	AAEL014734-PA	AAEL014734-PA	AAEL014734-PA	hypothetical protein protein_coding supercont1.1241:32503-45558:-1 gene:AAEL014734	103568	6.38
19036	870.536	18.82	18.85	47.2236					1966	2064					7774	3392	3476	12	QLIVGVNK		PEP_FRAG_2	147	154	b2b7*b8y1y2y2*y4y5y6y8	10	7.8217	7.8217	0	5	5	870.537	3223	1.78	2	0.2443	18.874	18.7056	18.8376	18.9088	19.0408	AAEL017096-PA,AAEL017301-PA	AAEL017096-PA,AAEL017301-PA	AAEL017096-PA	AAEL017096-PA	AAEL017096-PA	AAEL017096-PA	hypothetical protein protein_coding supercont1.32:3146741-3148132:1 gene:AAEL017096	50815.3	9.44
19037	870.525	26.55	26.81	48.327											6390			11	LITIPDAK		PEP_FRAG_1	319	326	b3b3°y2y4y6y7y8	7	7.2419	7.2567	0	1	3	870.525	6390	1.9	2	0.2568	26.5466	26.3686	26.5081	26.5833	26.7228	AAEL014734-PA	AAEL014734-PA	AAEL014734-PA	AAEL014734-PA	AAEL014734-PA	AAEL014734-PA	hypothetical protein protein_coding supercont1.1241:32503-45558:-1 gene:AAEL014734	103568	6.38
19038	870.528	26.73	26.77	125.453													1755	13	LITIPDAK		PEP_FRAG_1	319	326	b3b3°y2y3y4y8	6	7.2567	7.2567	0	1	3	870.528	1755	1.29	1	0.2312	26.7314	26.5414	26.6945	26.7771	26.9303	AAEL014734-PA	AAEL014734-PA	AAEL014734-PA	AAEL014734-PA	AAEL014734-PA	AAEL014734-PA	hypothetical protein protein_coding supercont1.1241:32503-45558:-1 gene:AAEL014734	103568	6.38
19041	870.524	17.51	17.52	50.8038	3626	3914	3833	4271			3563	3494						2	IVESVVPK		PEP_FRAG_1	205	212	b4°b5b5°y2y3y5y6y8	8	6.889	6.889	0.0005	6	6	870.523	3642	1.55	2	0.2487	17.4853	17.3154	17.4513	17.5246	17.6606	AAEL000500-PA	AAEL000500-PA	AAEL000500-PA	AAEL000500-PA	AAEL000500-PA	AAEL000500-PA	conserved hypothetical protein protein_coding supercont1.9:3178028-3178935:-1 gene:AAEL000500	29134.6	4.49
19133	872.464	29.99	30	48.0382	1779	1862					1193	1200						2	PVDSVEVK		PEP_FRAG_2	435	442	b5°y6y7	3	5.0707	5.0707	0.0043	2	2	872.463	1516	1.7	2	0.2489	29.8753	29.703	29.8362	29.908	30.0411	AAEL007718-PA	AAEL007718-PA	AAEL007718-PA	AAEL007718-PA	AAEL007718-PA	AAEL007718-PA	Eukaryotic translation initiation factor 3 subunit B (eIF3b)(Eukaryotic translation initiation factor 3 subunit 9) protein_coding supercont1.276:866012-870597:1 gene:AAEL007718	80459.7	5.43
19137	872.502	23.57	23.59	46.9207	2914	3844	2238	2971			4444	4278						7	VPTISIDK		PEP_FRAG_1	140	147	b2b7b8y2y4y5y6y7y8	9	7.0876	7.0876	0	6	6	872.504	6456	1.87	2	0.3343	23.5863	23.4104	23.5496	23.6246	23.7639	AAEL011821-PA,AAEL013074-PA,AAEL011821-PB	AAEL011821-PA,AAEL013074-PA,AAEL011821-PB	AAEL011821-PB	AAEL011821-PB	AAEL011821-PB	AAEL011821-PB	adenylyl cyclase-associated protein protein_coding supercont1.617:112004-174963:-1 gene:AAEL011821	23175.5	7.9
19182	873.476	31.23	31.26	48.612					2582	3397					8668		4300	13	LWDLAAGK		PEP_FRAG_1	89	96	b3b6y3y4y5y7	6	7.4719	7.4719	0	2	5	873.476	5428	1.7	2	0.2325	31.2258	31.0355	31.1862	31.2675	31.4182	AAEL013069-PA	AAEL013069-PA	AAEL013069-PA	AAEL013069-PA	AAEL013069-PA	AAEL013069-PA	receptor for activated protein kinase c (rack1) protein_coding supercont1.786:363989-371129:1 gene:AAEL013069	35404.8	7.8
19183	873.482	31.31	31.28	48.562												4365		12	LWDLAAGK		PEP_FRAG_1	89	96	b3y4y5y6y7°y8	6	6.851	7.4719	0	1	5	873.482	4365	1.72	2	0.2359	31.314	31.1399	31.276	31.3493	31.4853	AAEL013069-PA	AAEL013069-PA	AAEL013069-PA	AAEL013069-PA	AAEL013069-PA	AAEL013069-PA	receptor for activated protein kinase c (rack1) protein_coding supercont1.786:363989-371129:1 gene:AAEL013069	35404.8	7.8
19201	873.487	37.69	37.69	51.345	6129	5788	1964	1665			4024	4081					1303	8	LWDLAAGK		PEP_FRAG_2	89	96	b3y7y8	3	6.433	7.4719	0	2	5	873.488	5587	1.89	2	0.2642	37.7548	37.5709	37.7197	37.7999	37.9488	AAEL013069-PA	AAEL013069-PA	AAEL013069-PA	AAEL013069-PA	AAEL013069-PA	AAEL013069-PA	receptor for activated protein kinase c (rack1) protein_coding supercont1.786:363989-371129:1 gene:AAEL013069	35404.8	7.8
19402	875.483	55.86	55.86	123.7							1023							7	VVETMALL		PEP_FRAG_2	30	37	b6°y6°	2	6.1639	6.1639	0.0035	1	5	875.483	1023	1	1	0.2456	55.8577	55.7195	55.8411	55.9066	56.0281	AAEL013775-PA	AAEL013775-PA	AAEL013775-PA	AAEL013775-PA	AAEL013775-PA	AAEL013775-PA	conserved hypothetical protein protein_coding supercont1.918:67299-68208:-1 gene:AAEL013775	31656.2	4.71
19436	876.416	19.77	19.9	48.804											2174			11	SWGIEER		PEP_FRAG_2	76	82	b6°y5	2	5.3825	6.5498	0.0023	1	2	876.416	2174	2	2	0.2743	19.7694	19.5869	19.7292	19.8059	19.9481	AAEL005293-PA,AAEL012001-PA	AAEL005293-PA,AAEL012001-PA	AAEL005293-PA	AAEL005293-PA	AAEL005293-PA	AAEL005293-PA	galectin protein_coding supercont1.150:1760206-1769111:-1 gene:AAEL005293	16337.6	9.19
19437	876.419	19.86	19.86	119.753			1239											3	SWGIEER		PEP_FRAG_1	76	82	y1y4°y5y7	4	6.5498	6.5498	0.0023	1	2	876.419	1239	1.4	1	0.1991	19.8639	19.7066	19.8392	19.9107	20.0433	AAEL005293-PA,AAEL012001-PA	AAEL005293-PA,AAEL012001-PA	AAEL005293-PA	AAEL005293-PA	AAEL005293-PA	AAEL005293-PA	galectin protein_coding supercont1.150:1760206-1769111:-1 gene:AAEL005293	16337.6	9.19
19517	877.423	31.7	31.71	47.6148	5813	5982	3484	3351			4919	5125						8	LLNNCMI	Carbamidomethyl C(5)	PEP_FRAG_1	277	283	b4y6y7	3	6.7064	6.7064	0.0009	1	5	877.423	7466	1.62	2	0.4416	31.8189	31.3758	31.7236	31.9111	32.2589	AAEL006485-PA,AAEL006485-PB,AAEL006485-PC	AAEL006485-PA,AAEL006485-PB,AAEL006485-PC	AAEL006485-PA	AAEL006485-PA	AAEL006485-PA	AAEL006485-PA	inosine-uridine preferring nucleoside hydrolase protein_coding supercont1.208:816972-818047:-1 gene:AAEL006485	38220.9	4.74
19528	877.429	60.31	60.28	123.05	4120	4603	3934	3816			11788	11547						4	LLNNCMI	Carbamidomethyl C(5)	PEP_FRAG_2	277	283	b6y6y7*	3	6.5502	6.7064	0.0009	3	5	877.43	3003	1	1	0.2928	60.2685	59.9751	60.2057	60.33	60.5607	AAEL006485-PB,AAEL006485-PC,AAEL006485-PA	AAEL006485-PB,AAEL006485-PC,AAEL006485-PA	AAEL006485-PA	AAEL006485-PA	AAEL006485-PA	AAEL006485-PA	inosine-uridine preferring nucleoside hydrolase protein_coding supercont1.208:816972-818047:-1 gene:AAEL006485	38220.9	4.74
19540	877.496	32.05	32.09	49.708	8749	8456	6992	6424			3344	3769			1511			1	LLVEEFK		PEP_FRAG_1	171	177	b2b4b5b7y2y3y3°y4y4°y5y6y7	12	7.738	7.738	0	5	6	877.498	9362	1.61	2	0.2362	32.1222	31.9452	32.0848	32.16	32.2996	AAEL000500-PA	AAEL000500-PA	AAEL000500-PA	AAEL000500-PA	AAEL000500-PA	AAEL000500-PA	conserved hypothetical protein protein_coding supercont1.9:3178028-3178935:-1 gene:AAEL000500	29134.6	4.49
19604	878.496	26.18	26.15	128.551			1492	1341	1839			953				1692	1614	13	AVYLLDGK		PEP_FRAG_1	919	926	b3b4y2y3y4y5y6y8	8	7.5918	7.5918	0	5	6	878.495	1627	1.31	1	0.2825	26.0881	25.8841	26.054	26.1457	26.3157	AAEL011905-PA	AAEL011905-PA	AAEL011905-PA	AAEL011905-PA	AAEL011905-PA	AAEL011905-PA	myosin i protein_coding supercont1.629:71112-104195:1 gene:AAEL011905	120958	9.21
19605	878.491	25.93	26.19	47.953											3809			11	AVYLLDGK		PEP_FRAG_1	919	926	y4y6y8	3	6.4976	7.5918	0	1	6	878.491	3809	1.87	2	0.3169	25.9333	25.7285	25.8928	25.9814	26.1457	AAEL011905-PA	AAEL011905-PA	AAEL011905-PA	AAEL011905-PA	AAEL011905-PA	AAEL011905-PA	myosin i protein_coding supercont1.629:71112-104195:1 gene:AAEL011905	120958	9.21
19607	878.519	32.07	32.02	124.189												3193		12	LIQYLTK		PEP_FRAG_2	644	650	b5*b6°y7	3	4.1884	5.4753	0.0038	1	2	878.519	3193	1.24	1	0.2804	32.0681	31.859	32.0263	32.1164	32.2836	AAEL012783-PA	AAEL012783-PA	AAEL012783-PA	AAEL012783-PA	AAEL012783-PA	AAEL012783-PA	protease m1 zinc metalloprotease protein_coding supercont1.739:317391-320439:-1 gene:AAEL012783	107860	5.44
19625	879.439	13.47	13.48	47.278	1531	1152					1044							7	YPEELTK		PEP_FRAG_1	324	330	b6°y4y5y6	4	6.0916	6.0916	0.0038	2	2	879.438	1150	2	2	0.3841	13.4916	13.2495	13.4444	13.5494	13.7443	AAEL011288-PA	AAEL011288-PA	AAEL011288-PA	AAEL011288-PA	AAEL011288-PA	AAEL011288-PA	elongation factor 1 gamma protein_coding supercont1.563:142142-152240:1 gene:AAEL011288	49168	7.77
19634	879.445	27.1	27.13	123.037	2828	3296	4189	4623			3654	3278						7	EVLDEFK		PEP_FRAG_1	277	283	b2b4°b5b7y1y2y3y3°y4y4°y5y6y7	13	8.3353	8.3353	0	6	9	879.446	5006	1.06	1	0.3256	27.1294	26.9664	27.0923	27.1602	27.2861	AAEL000667-PA,AAEL000667-PB	AAEL000667-PA,AAEL000667-PB	AAEL000667-PB	AAEL000667-PB	AAEL000667-PB	AAEL000667-PB	alpha-amylase protein_coding supercont1.13:1013259-1029340:-1 gene:AAEL000667	67228.9	5.2
19635	879.441	26.91	27.14	49.962											3060			11	EVLDEFK		PEP_FRAG_1	277	283	b2b4°y3°y4y5y6y7	7	6.9264	8.3353	0	1	9	879.441	3060	1.87	2	0.3114	26.914	26.7406	26.8792	26.9539	27.0925	AAEL000667-PA,AAEL000667-PB	AAEL000667-PA,AAEL000667-PB	AAEL000667-PB	AAEL000667-PB	AAEL000667-PB	AAEL000667-PB	alpha-amylase protein_coding supercont1.13:1013259-1029340:-1 gene:AAEL000667	67228.9	5.2
19696	880.472	18.24	18.24	47.7818			8833	9392	4773	5329			9932	10815	12733	5005	5368	4	VFGSLETK		PEP_FRAG_1	53	60	b2b4°b8y3y3°y4y5y6y7y7°y8	11	8.4339	8.4339	0	9	9	880.473	8938	1.63	2	0.1958	18.1458	17.9605	18.1053	18.1833	18.3281	AAEL001872-PA	AAEL001872-PA	AAEL001872-PA	AAEL001872-PA	AAEL001872-PA	AAEL001872-PA	voltage-dependent anion-selective channel protein_coding supercont1.44:690107-695296:-1 gene:AAEL001872	30810.3	8.87
19729	881.408	28.04	28.01	119.983				1332			916	1155				1296	1572	4	DFMQVNK		PEP_FRAG_2	232	238	y3y3*y5*y7	4	6.1714	6.1714	0.0035	2	2	881.41	1000	1	1	0.2025	27.9811	27.7892	27.9487	28.0346	28.1941	AAEL006424-PA	AAEL006424-PA	AAEL006424-PA	AAEL006424-PA	AAEL006424-PA	AAEL006424-PA	37 kDa salivary gland allergen Aed a 2 Precursor (Protein D7)(Allergen Aed a 2) protein_coding supercont1.204:345910-347111:-1 gene:AAEL006424	37465.4	7.72
19804	881.539	28.51	28.56	49.3625	4693	4864	4401	3983			5262	5324			2659		1194	4	IGPLGLSPK		PEP_FRAG_1	32	40	y2y3y5y6y7y8y9	7	7.2508	7.2508	0	6	7	881.54	2997	1.83	2	0.2441	28.4863	28.2662	28.4405	28.5344	28.7087	AAEL014562-PA	AAEL014562-PA	AAEL014562-PA	AAEL014562-PA	AAEL014562-PA	AAEL014562-PA	60S ribosomal protein L12 protein_coding supercont1.1168:175933-183158:1 gene:AAEL014562	17851.6	9.33
19905	883.404	9.28	9.48	48.0685	4609	4425	3123	2919			4178	3778						7	SWHYYK		PEP_FRAG_1	262	267	b3y1y3y4y6	5	7.3694	7.3694	0	6	6	883.405	5340	1.81	2	0.238	9.4978	9.269	9.4509	9.5489	9.7308	AAEL006424-PA	AAEL006424-PA	AAEL006424-PA	AAEL006424-PA	AAEL006424-PA	AAEL006424-PA	37 kDa salivary gland allergen Aed a 2 Precursor (Protein D7)(Allergen Aed a 2) protein_coding supercont1.204:345910-347111:-1 gene:AAEL006424	37465.4	7.72
19916	883.444	35.07	34.95	123.708								1122						8	YTGITLSE		PEP_FRAG_2	325	332	b7°y4y5°	3	5.4991	6.0424	0.0038	1	4	883.444	1122	1.32	1	0.2397	35.0667	34.8395	35.0283	35.1301	35.3189	AAEL008787-PA	AAEL008787-PA	AAEL008787-PA	AAEL008787-PA	AAEL008787-PA	AAEL008787-PA	V-type proton ATPase catalytic subunit A (V-ATPase subunit A)(EC 3.6.3.14)(Vacuolar proton pump subunit alpha)(V-ATPase 69 kDa subunit) protein_coding supercont1.349:699238-710948:1 gene:AAEL008787	68571.2	5.08
19930	883.455	43.68	43.67	125.654					2015		2545	2745			1725	1703	2350	12	QFTTYLK	Pyrrolidone carboxylic acid N-TERM(1)	VAR_MOD	84	90	b3b4b4°b6y2y3y4y7	8	6.0681	6.0681	0.0036	2	2	883.456	1553	1	1	0.3774	43.7023	43.372	43.635	43.7768	44.0398	AAEL003872-PA	AAEL003872-PA	AAEL003872-PA	AAEL003872-PA	AAEL003872-PA	AAEL003872-PA	Translationally-controlled tumor protein homolog (TCTP) protein_coding supercont1.99:1134679-1146717:1 gene:AAEL003872	19716.3	4.46
19933	883.438	49.24	49.18	46.954	2259													1	YTGITLSE		PEP_FRAG_1	325	332	b4°b7y4y5°y8	5	5.0057	6.0424	0.0038	1	4	883.438	2259	1.55	2	0.3237	49.2374	49.0301	49.1902	49.2764	49.4365	AAEL008787-PA	AAEL008787-PA	AAEL008787-PA	AAEL008787-PA	AAEL008787-PA	AAEL008787-PA	V-type proton ATPase catalytic subunit A (V-ATPase subunit A)(EC 3.6.3.14)(Vacuolar proton pump subunit alpha)(V-ATPase 69 kDa subunit) protein_coding supercont1.349:699238-710948:1 gene:AAEL008787	68571.2	5.08
19938	883.452	45.5	45.49	47.8407	4974	4999	4344	4256	2898	2861	2001	2608				2050	2098	13	YTGITLSE		PEP_FRAG_2	325	332	y4y8	2	6.0424	6.0424	0.0038	2	4	883.452	2091	1.72	2	0.3434	45.4492	45.2569	45.4106	45.4934	45.647	AAEL008787-PA	AAEL008787-PA	AAEL008787-PA	AAEL008787-PA	AAEL008787-PA	AAEL008787-PA	V-type proton ATPase catalytic subunit A (V-ATPase subunit A)(EC 3.6.3.14)(Vacuolar proton pump subunit alpha)(V-ATPase 69 kDa subunit) protein_coding supercont1.349:699238-710948:1 gene:AAEL008787	68571.2	5.08
19940	883.487	41.98	41.96	48.4205	1920	2089	5628	4872	6251	5834	2643	2684	3573	2642	11429	5059	4754	13	FFLLTDK		PEP_FRAG_1	912	918	b2b3b4y1y2y3y5y6y7	9	7.7325	7.7325	0	12	12	883.485	6168	1.76	2	0.3149	41.8863	41.693	41.8486	41.9325	42.0881	AAEL011905-PA	AAEL011905-PA	AAEL011905-PA	AAEL011905-PA	AAEL011905-PA	AAEL011905-PA	myosin i protein_coding supercont1.629:71112-104195:1 gene:AAEL011905	120958	9.21
19946	883.527	17.36	17.44	49.105													1120	13	TPGQVILR		PEP_FRAG_2	248	255	y1y5*y6y7	4	5.4042	5.4042	0.0039	1	2	883.527	1120	2	2	0.227	17.3645	17.1524	17.3198	17.4101	17.5775	AAEL004118-PA	AAEL004118-PA	AAEL004118-PA	AAEL004118-PA	AAEL004118-PA	AAEL004118-PA	aldo-keto reductase protein_coding supercont1.107:2116117-2117210:1 gene:AAEL004118	36580.7	6.63
20044	885.54	34.48	34.36	129.108								1228						8	IVLEGNIK		PEP_FRAG_1	573	580	b6y3y5y6y8	5	6.8093	6.8093	0.0005	1	3	885.54	1228	1	1	0.216	34.4835	34.2652	34.4354	34.5271	34.6973	AAEL000667-PA,AAEL000667-PB	AAEL000667-PA,AAEL000667-PB	AAEL000667-PB	AAEL000667-PB	AAEL000667-PB	AAEL000667-PB	alpha-amylase protein_coding supercont1.13:1013259-1029340:-1 gene:AAEL000667	67228.9	5.2
20046	885.538	34.4	34.4	128.902							1494							7	IVLEGNIK		PEP_FRAG_1	573	580	b6y5y8y8*	4	6.1605	6.8093	0.0005	1	3	885.538	1494	1	1	0.1964	34.3994	34.2035	34.3582	34.4416	34.5963	AAEL000667-PA,AAEL000667-PB	AAEL000667-PA,AAEL000667-PB	AAEL000667-PB	AAEL000667-PB	AAEL000667-PB	AAEL000667-PB	alpha-amylase protein_coding supercont1.13:1013259-1029340:-1 gene:AAEL000667	67228.9	5.2
20051	885.538	46.37	46.36	125.333	3957	3763	4132	3967			7618	6662						7	QVVALLDK		PEP_FRAG_1	162	169	b4b5b5*b6b6*y8	6	5.3028	5.3028	0.0041	2	2	885.539	12941	1	1	0.2501	46.3625	46.2108	46.3313	46.3962	46.5167	AAEL010235-PA	AAEL010235-PA	AAEL010235-PA	AAEL010235-PA	AAEL010235-PA	AAEL010235-PA	30 kDa salivary gland allergen Aed a 3 Precursor (Allergen Aed a 3) protein_coding supercont1.464:161472-162363:1 gene:AAEL010235	29440.1	3.95
20127	887.428	32.45	32.47	49.2928	2658	2845	1578	2181	3027	3096	1561	907			6389	2146	2793	13	FDLMYAK		PEP_FRAG_1	395	401	b3b3°b4y1y3y6y7	7	7.2328	7.2328	0	9	9	887.424	2798	1.65	2	0.2123	32.403	32.2254	32.3649	32.4402	32.5797	AAEL006642-PA,AAEL012101-PA,AAEL013229-PA	AAEL006642-PA,AAEL012101-PA,AAEL013229-PA
20137	887.45	37.68	37.64	122.738	6159	6034	6783	6817	1809	1856	4080	3537	2887	2907		1238	1385	6	VFMSLYK		PEP_FRAG_2	74	80	b6°y5	2	4.2046	5.1571	0.0043	1	3	887.448	1104	1	1	0.2171	37.569	37.3766	37.5269	37.6079	37.7582	AAEL003182-PA	AAEL003182-PA	AAEL003182-PA	AAEL003182-PA	AAEL003182-PA	AAEL003182-PA	Serine Protease Inhibitor (serpin) homologue - unlikely to be inhibitory. protein_coding supercont1.81:289404-290790:-1 gene:AAEL003182	47267.3	5.25
20153	888.372	38.21	38.19	45.573			1681	1741				988						3	DFANYMK		PEP_FRAG_2	32	38	b4°y3y6*	3	4.6682	4.6682	0.0043	1	2	888.371	1390	2	2	0.1999	38.2043	38.0195	38.1638	38.2416	38.3858	AAEL003212-PA,AAEL013899-PA	AAEL003212-PA,AAEL013899-PA
20157	888.389	35.29	35.27	124.947	3739	3431	1434				1992	2079						2	DFANYMK		PEP_FRAG_2	32	38	b5*b6°y7y7*	4	4.4732	4.6682	0.0043	1	2	888.388	2759	1	1	0.3176	35.191	34.99	35.1507	35.2373	35.398	AAEL013899-PA,AAEL003212-PA	AAEL013899-PA,AAEL003212-PA
20168	888.444	18.46	18.47	49.5403		1171					1268	1008						7	QAGESQLR		PEP_FRAG_2	395	402	b2b4*y1y3*y6y7y8	7	5.5608	5.5608	0.0038	1	2	888.442	1441	1.75	2	0.2719	18.4608	18.2851	18.4206	18.4937	18.6293	AAEL003318-PA	AAEL003318-PA	AAEL003318-PA	AAEL003318-PA	AAEL003318-PA	AAEL003318-PA	oligopeptide transporter protein_coding supercont1.83:2706598-2722216:-1 gene:AAEL003318	81916.6	4.89
20170	888.422	27.37	27.36	120.763	8301	7761	7479	8377	3074	2005	5937	5496	2838			1585	2182	1	QPDLNYR	Pyrrolidone carboxylic acid N-TERM(1)	VAR_MOD	192	198	b3b4b5b6b7°y1y2y3*y4y5*y7	11	6.8004	6.8004	0.0005	2	2	888.419	9170	1.02	1	0.2087	27.3813	27.2294	27.3476	27.4114	27.5296	AAEL000647-PA,AAEL000667-PA,AAEL000667-PB,AAEL000678-PA,AAEL010537-PA	AAEL000647-PA,AAEL000667-PA,AAEL000667-PB,AAEL000678-PA,AAEL010537-PA
20283	890.412	7.73	7.99	47.786	1063													1	CIFAHDK	Carbamidomethyl C(1)	PEP_FRAG_1	108	114	y2y3y5	3	6.0338	6.0338	0.0038	1	2	890.412	1063	2	2	0.2121	7.7264	7.5532	7.695	7.7715	7.9134	AAEL000793-PA	AAEL000793-PA	AAEL000793-PA	AAEL000793-PA	AAEL000793-PA	AAEL000793-PA	venom allergen protein_coding supercont1.16:3232231-3233119:-1 gene:AAEL000793	29638.5	8.94
20302	890.465	20.42	20.49	47.274													1651	13	LAFGPTER		PEP_FRAG_1	828	835	y2y4y5y6y7y8	6	6.9205	6.9205	0.0005	1	2	890.465	1651	1.68	2	0.2004	20.4229	20.2288	20.3772	20.4573	20.6057	AAEL014734-PA	AAEL014734-PA	AAEL014734-PA	AAEL014734-PA	AAEL014734-PA	AAEL014734-PA	hypothetical protein protein_coding supercont1.1241:32503-45558:-1 gene:AAEL014734	103568	6.38
20309	890.481	29.46	29.44	126.793			2353	2399			1961	2015						3	TDSLIDVK		PEP_FRAG_1	423	430	b4y1y3y8	4	5.4933	5.4933		1	1	890.484	1939	1	1	0.2272	29.46	29.2352	29.4141	29.5106	29.6895
20318	890.503	25.74	25.81	48.0623											8462	2685	2847	11	FSVSPVVR		PEP_FRAG_1	485	492	b2b3°y2y4y5y6y6°y7	8	6.8774	6.8774	0.0005	3	3	890.506	7510	2	2	0.2278	25.5768	25.4024	25.5414	25.6164	25.7554	AAEL004500-PA,AAEL004500-PB	AAEL004500-PA,AAEL004500-PB	AAEL004500-PA	AAEL004500-PA	AAEL004500-PA	AAEL004500-PA	eukaryotic translation elongation factor protein_coding supercont1.121:1852844-1861602:-1 gene:AAEL004500	95362.5	5.95
20337	890.529	24.16	24.19	129.196	1983	1921			5203	5511	954					4614	4554	12	SISTITLR		PEP_FRAG_1	156	163	y1y3y4y5y6y7y8	7	8.093	8.093	0	3	4	890.529	4841	1.16	1	0.2696	24.2264	24.0525	24.1894	24.2633	24.4002	AAEL009244-PA	AAEL009244-PA	AAEL009244-PA	AAEL009244-PA	AAEL009244-PA	AAEL009244-PA	serine-type enodpeptidase, protein_coding supercont1.383:120308-129279:1 gene:AAEL009244	29438.2	9.06
20339	890.528	23.93	24.16	49.159											14424			11	SISTITLR		PEP_FRAG_1	156	163	b2y1y3y4y4°y5y6y8	8	8.0024	8.093	0	1	4	890.528	14424	1.84	2	0.1828	23.9269	23.744	23.888	23.9656	24.1095	AAEL009244-PA	AAEL009244-PA	AAEL009244-PA	AAEL009244-PA	AAEL009244-PA	AAEL009244-PA	serine-type enodpeptidase, protein_coding supercont1.383:120308-129279:1 gene:AAEL009244	29438.2	9.06
20360	891.463	27	27.24	49.221											5035			11	NNDLLFR		PEP_FRAG_1	532	538	b2*b3*y2y3y4	5	6.4816	6.4816	0.0023	1	2	891.463	5035	2	2	0.1932	27.0025	26.8316	26.9653	27.0373	27.171	AAEL011905-PA	AAEL011905-PA	AAEL011905-PA	AAEL011905-PA	AAEL011905-PA	AAEL011905-PA	myosin i protein_coding supercont1.629:71112-104195:1 gene:AAEL011905	120958	9.21
20365	891.466	35.04	35.1	123.058											1801	1599	2108	13	NNDLLFR		PEP_FRAG_1	532	538	b6y5y7	3	6.1821	6.4816	0.0023	1	2	891.466	2090	1	1	0.2994	35.0581	34.8666	35.0202	35.103	35.2566	AAEL011905-PA	AAEL011905-PA	AAEL011905-PA	AAEL011905-PA	AAEL011905-PA	AAEL011905-PA	myosin i protein_coding supercont1.629:71112-104195:1 gene:AAEL011905	120958	9.21
20376	891.49	44.08	44.17	124.119													2149	13	AITGIQAFA		PEP_FRAG_1	413	421	b2b4b4°b5b7°y7°	6	5.7949	5.7949	0.0038	1	3	891.49	2149	1	1	0.3559	44.0816	43.7265	44.0068	44.158	44.4383	AAEL014797-PA,AAEL013642-PA	AAEL014797-PA,AAEL013642-PA
20379	891.492	44.17	44.13	123.998												1915		12	AITGIQAFA		PEP_FRAG_1	413	421	b4b6b7°	3	5.2532	5.7949	0.0038	1	3	891.492	1915	1	1	0.2028	44.1746	43.9966	44.1367	44.2122	44.3523	AAEL014797-PA,AAEL013642-PA	AAEL014797-PA,AAEL013642-PA
20405	892.416	22.04	22.05	47.7513	3491		2653	2536										4	TSWLDDR		PEP_FRAG_1	161	167	b7°y2y4y5y6y7	6	7.4081	7.4081	0	3	3	892.414	1874	1.61	2	0.2328	21.9862	21.8025	21.9409	22.0155	22.1538	AAEL011758-PA	AAEL011758-PA	AAEL011758-PA	AAEL011758-PA	AAEL011758-PA	AAEL011758-PA	peptidyl-prolyl cis-trans isomerase f, ppif protein_coding supercont1.608:168567-176581:1 gene:AAEL011758	22653.6	9.28
20436	892.482	21.49	21.52	49.7156					4342	4854					17297	7544	6525	13	LELAQYR		PEP_FRAG_1	433	439	b2y1y4y5y5*y6y7	7	7.5054	7.5054	0	5	5	892.483	9757	1.68	2	0.2125	21.4634	21.2978	21.4265	21.4959	21.6245	AAEL012175-PA	AAEL012175-PA	AAEL012175-PA	AAEL012175-PA	AAEL012175-PA	AAEL012175-PA	ATP synthase alpha subunit mitochondrial protein_coding supercont1.662:87647-99145:-1 gene:AAEL012175	59563.6	9.23
20529	894.45	25.05	25.08	49.2496	4102	4049		1441			3014	2924						7	DLQDYIK		PEP_FRAG_1	221	227	b3b4b5b6y3y7y7*	7	7.097	7.8522	0	2	12	894.453	3791	1.61	2	0.4511	25.0739	24.8909	25.0362	25.1145	25.2598	AAEL010145-PB,AAEL010145-PC,AAEL010145-PA	AAEL010145-PB,AAEL010145-PC,AAEL010145-PA
20544	894.464	32.83	32.83	127.159	6496	6927	5913					5555						2	YAWVLDK		PEP_FRAG_2	56	62	b4y6y7	3	6.1584	6.1584	0.0035	2	5	894.466	6416	1.49	1	0.3699	32.6631	32.4823	32.6254	32.7025	32.8455	AAEL017096-PA,AAEL017301-PA	AAEL017096-PA,AAEL017301-PA	AAEL017096-PA	AAEL017096-PA	AAEL017096-PA	AAEL017096-PA	hypothetical protein protein_coding supercont1.32:3146741-3148132:1 gene:AAEL017096	50815.3	9.44
20548	894.42	37.97	37.97	119.672	7716	7565	9544	9067			6172	6056						8	LNSIEGFD		PEP_FRAG_2	125	132	b4*b8°y7*	3	5.5424	5.5424	0.0038	1	2	894.419	9245	1	1	0.3214	38.0103	37.835	37.9733	38.0479	38.1863	AAEL005199-PA	AAEL005199-PA	AAEL005199-PA	AAEL005199-PA	AAEL005199-PA	AAEL005199-PA	hypothetical protein protein_coding supercont1.145:705382-705884:-1 gene:AAEL005199	16871.6	4.49
20551	894.454	32.23	32.2	126.749	2145	2562	8920	9454	5903	6354	5875	5762	11182	10823		5618	5412	9	DLQDYIK		PEP_FRAG_1	221	227	b2b3b4b5y3y4y5y5*y7	9	7.8522	7.8522	0	9	12	894.456	6186	1.4	1	0.2364	32.299	32.1294	32.2641	32.3368	32.4716	AAEL010145-PA,AAEL010145-PB,AAEL010145-PC	AAEL010145-PA,AAEL010145-PB,AAEL010145-PC
20552	894.454	32.08	32.23	49.206											14532			11	DLQDYIK		PEP_FRAG_1	221	227	b2b2°b3b4b5b7°y1y2y3y4y5y5*y5°y7	14	7.6961	7.8522	0	1	12	894.454	14532	1.86	2	0.2223	32.0774	31.9107	32.0423	32.1133	32.2449	AAEL010145-PC,AAEL010145-PA,AAEL010145-PB	AAEL010145-PC,AAEL010145-PA,AAEL010145-PB
20563	894.475	43.88	43.84	130.626			2872	2665	2568	2813	3152	3449						3	YAWVLDK		PEP_FRAG_2	56	62	b4y6	2	5.1688	6.1584	0.0035	1	5	894.475	2344	1	1	0.2652	43.8764	43.6441	43.8271	43.9257	44.1087	AAEL017096-PA,AAEL017301-PA	AAEL017096-PA,AAEL017301-PA	AAEL017096-PA	AAEL017096-PA	AAEL017096-PA	AAEL017096-PA	hypothetical protein protein_coding supercont1.32:3146741-3148132:1 gene:AAEL017096	50815.3	9.44
20569	894.475	48.55	48.53	131.925	5824	5333	11049	9817	2332		5512	5490						7	YAWVLDK		PEP_FRAG_2	56	62	b4y5°	2	4.8547	6.1584	0.0035	1	5	894.475	8640	1	1	0.3	48.5251	48.3486	48.489	48.5646	48.705	AAEL017096-PA,AAEL017301-PA	AAEL017096-PA,AAEL017301-PA	AAEL017096-PA	AAEL017096-PA	AAEL017096-PA	AAEL017096-PA	hypothetical protein protein_coding supercont1.32:3146741-3148132:1 gene:AAEL017096	50815.3	9.44
20611	894.504	52.51	52.48	129.627	17442	16320	17538	17276	15331	15352	9256	9777	11792	12161	7547		7999	7	TAALTTGIF		PEP_FRAG_2	378	386	b3b6y9	3	6.0244	6.131	0.0036	2	3	894.504	16186	1	1	0.368	52.4926	52.3177	52.4551	52.5292	52.6665	AAEL011641-PA	AAEL011641-PA	AAEL011641-PA	AAEL011641-PA	AAEL011641-PA	AAEL011641-PA	transferrin protein_coding supercont1.596:610286-617685:-1 gene:AAEL011641	87251	4.8
20621	895.454	48.67	48.68	125.119	1909	2219	2100		3571	4291	2370	2120			3206		4359	13	QFYIDVK	Pyrrolidone carboxylic acid N-TERM(1)	VAR_MOD	246	252	b3b4b5b7*y3y4y7	7	6.1487	6.1487	0.0036	6	6	895.456	5458	1	1	0.3849	48.6279	48.3484	48.5706	48.6904	48.9126	AAEL013359-PB,AAEL013359-PC,AAEL013359-PA	AAEL013359-PB,AAEL013359-PC,AAEL013359-PA	AAEL013359-PA	AAEL013359-PA	AAEL013359-PA	AAEL013359-PA	DEAD box ATP-dependent RNA helicase protein_coding supercont1.827:317259-342039:-1 gene:AAEL013359	39493.2	5.44
20680	896.548	20.16	20.15	48.9492			1420	1482	10553	10292	1008		3824	3981	2621	10484	9608	3	LIPADVLR		PEP_FRAG_2	40	47	b6y6°	2	5.0535	5.1526	0.0043	1	2	896.543	1175	2	2	0.1928	20.1469	19.964	20.1037	20.179	20.3187	AAEL000445-PB,AAEL000445-PA	AAEL000445-PB,AAEL000445-PA	AAEL000445-PA	AAEL000445-PA	AAEL000445-PA	AAEL000445-PA	conserved hypothetical protein protein_coding supercont1.8:2307688-2335013:-1 gene:AAEL000445	17124.3	4.52
20692	896.555	51.18	51.15	137.599			1507	1420	4457	4056	1636	1798	4178	4167	1713		3659	7	LIPADVLR		PEP_FRAG_1	40	47	b6°y4y8	3	5.1526	5.1526	0.0043	1	2	896.556	1914	1	1	0.342	51.1648	50.9317	51.1158	51.2151	51.3992	AAEL000445-PA,AAEL000445-PB	AAEL000445-PA,AAEL000445-PB	AAEL000445-PA	AAEL000445-PA	AAEL000445-PA	AAEL000445-PA	conserved hypothetical protein protein_coding supercont1.8:2307688-2335013:-1 gene:AAEL000445	17124.3	4.52
20732	897.514	56.52	56.52	128.808	5314	5341	4474	4938	7055	7417	3946	3967			5151		7841	13	NVDLAGPLV		PEP_FRAG_2	129	137	b6°b7b9y9	4	6.0631	6.0631	0.0036	4	4	897.515	12690	1.11	1	0.2262	56.4354	56.2682	56.3995	56.4703	56.6016	AAEL001872-PA	AAEL001872-PA	AAEL001872-PA	AAEL001872-PA	AAEL001872-PA	AAEL001872-PA	voltage-dependent anion-selective channel protein_coding supercont1.44:690107-695296:-1 gene:AAEL001872	30810.3	8.87
20744	897.539	35.7	35.68	125.143			2271	1906	15289	14451	2661	2571	5986	5802	18700	22787	21170	12	QTVAVGVIK	Pyrrolidone carboxylic acid N-TERM(1)	VAR_MOD	431	439	b3b3°b4b5b7y2y3y4y5y6y7y9	12	7.7178	7.7178	0	7	7	897.539	31585	1	1	0.1853	35.7142	35.5597	35.6809	35.7463	35.8676	AAEL017096-PA,AAEL017301-PA	AAEL017096-PA,AAEL017301-PA	AAEL017096-PA	AAEL017096-PA	AAEL017096-PA	AAEL017096-PA	hypothetical protein protein_coding supercont1.32:3146741-3148132:1 gene:AAEL017096	50815.3	9.44
20771	898.566	26.33	26.42	49.0693											1512	1198	1173	11	IVLAAAGGVK		PEP_FRAG_1	223	232	b5y9	2	6.0279	6.1225	0.0036	1	2	898.566	1034	2	2	0.1661	26.1704	26.0016	26.1324	26.203	26.3338	AAEL005435-PB,AAEL005435-PA	AAEL005435-PB,AAEL005435-PA	AAEL005435-PA	AAEL005435-PA	AAEL005435-PA	AAEL005435-PA	mitochondrial processing peptidase beta subunit protein_coding supercont1.156:1726989-1729306:1 gene:AAEL005435	52876.8	5.82
20829	899.527	23.07	23.08	50.1222	12047	13156	32074	32661	14021	14171	12826	12906	29329	28871	20390	10905	10446	4	LNDVAVLR		PEP_FRAG_1	122	129	b2b2*b3b3*b4b5b6*b8y2y3y4y5y6y7y7*y8y8*	17	7.9022	7.9022	0	13	13	899.53	37425	1.59	2	0.1948	23.007	22.8199	22.9676	23.0473	23.195	AAEL008079-PA,AAEL013629-PA	AAEL008079-PA,AAEL013629-PA	AAEL013629-PA	AAEL013629-PA	AAEL013629-PA	AAEL013629-PA	trypsin-alpha, putative protein_coding supercont1.887:255867-256813:-1 gene:AAEL013629	30389.9	6.42
20864	900.462	10.87	10.91	48.9905	2680	3089					1987	1567						2	NVLFHDR		PEP_FRAG_1	602	608	b2b5y1y3y5y7y7*	7	6.9724	6.9724	0	4	4	900.464	2949	1.72	2	0.251	10.6968	10.4709	10.6492	10.7453	10.9237	AAEL015458-PA	AAEL015458-PA	AAEL015458-PA	AAEL015458-PA	AAEL015458-PA	AAEL015458-PA	transferrin protein_coding supercont1.2392:8172-10138:-1 gene:AAEL015458	71701.3	7.43
20977	901.528	27.19	27.41	51											1022			11	TQIEGLLK		PEP_FRAG_1	262	269	y1y5y6	3	5.6058	5.6058	0.0038	1	2	901.528	1022	2	2	0.2163	27.1856	27.0026	27.1494	27.2285	27.3754	AAEL000732-PA	AAEL000732-PA	AAEL000732-PA	AAEL000732-PA	AAEL000732-PA	AAEL000732-PA	conserved hypothetical protein protein_coding supercont1.15:1357702-1359408:1 gene:AAEL000732	65206.4	5.95
20981	901.517	34.06	34.09	49.4068			1949	1847		1844					5228	1859	2006	12	ITWNVIR		PEP_FRAG_1	562	568	b7*y1y3y4y5y6y7	7	7.0711	7.0711	0	3	4	901.518	1695	1.75	2	0.266	34.169	33.9788	34.1346	34.2186	34.3743	AAEL008787-PA	AAEL008787-PA	AAEL008787-PA	AAEL008787-PA	AAEL008787-PA	AAEL008787-PA	V-type proton ATPase catalytic subunit A (V-ATPase subunit A)(EC 3.6.3.14)(Vacuolar proton pump subunit alpha)(V-ATPase 69 kDa subunit) protein_coding supercont1.349:699238-710948:1 gene:AAEL008787	68571.2	5.08
20994	901.534	30.12	30.13	128.985			2292	2022	5296	4883	2928	3037			2825	6083	5920	6	TQIEGLLK		PEP_FRAG_2	262	269	b6b7°y7°y8	4	5.0457	5.6058	0.0038	1	2	901.533	2892	1.13	1	0.3017	30.0759	29.9013	30.0375	30.1109	30.2471	AAEL000732-PA	AAEL000732-PA	AAEL000732-PA	AAEL000732-PA	AAEL000732-PA	AAEL000732-PA	conserved hypothetical protein protein_coding supercont1.15:1357702-1359408:1 gene:AAEL000732	65206.4	5.95
21108	904.447	32.69	32.71	124.582	1459	2080		1747			1214	1008						1	IMAEGVGEV		PEP_FRAG_1	138	146	b8y5y9	3	5.3376	5.3376	0.0038	1	4	904.445	1278	1	1	0.1976	32.735	32.5398	32.6911	32.7727	32.924	AAEL011756-PA	AAEL011756-PA	AAEL011756-PA	AAEL011756-PA	AAEL011756-PA	AAEL011756-PA	aldehyde dehydrogenase protein_coding supercont1.608:532548-540178:1 gene:AAEL011756	58750	6.87
21116	904.438	38.21	38.22	122.246	2236	2159	4020	4055			2567	2793						3	IMAEGVGEV		PEP_FRAG_2	138	146	b6°y4°y5°y8y9	5	5.1214	5.3376	0.0038	2	4	904.438	3440	1	1	0.2158	38.2255	38.0115	38.1815	38.2731	38.443	AAEL011756-PA	AAEL011756-PA	AAEL011756-PA	AAEL011756-PA	AAEL011756-PA	AAEL011756-PA	aldehyde dehydrogenase protein_coding supercont1.608:532548-540178:1 gene:AAEL011756	58750	6.87
21151	904.513	61.98	61.93	129.335	5949	5167	4259	4255			7383	7467						3	LGPLGFLST		PEP_FRAG_1	158	166	b3b6b7b8y5y6y7°y9	8	6.7259	6.7259	0.0009	4	4	904.512	3507	1	1	0.289	62.0215	61.7616	61.9686	62.0801	62.2871	AAEL000905-PA	AAEL000905-PA	AAEL000905-PA	AAEL000905-PA	AAEL000905-PA	AAEL000905-PA	hypothetical protein protein_coding supercont1.18:2993716-2995612:1 gene:AAEL000905	66240.6	6.09
21177	905.447	28.1	28.12	48.1808			1729	2107	5004	4132	2180	2259			7997	4497	3984	11	IWDLACK	Carbamidomethyl C(6)	PEP_FRAG_1	258	264	b3y2y4y5y6	5	7.731	7.731	0	9	10	905.451	6886	1.95	2	0.2588	27.8874	27.7123	27.85	27.9243	28.0621	AAEL013069-PA	AAEL013069-PA	AAEL013069-PA	AAEL013069-PA	AAEL013069-PA	AAEL013069-PA	receptor for activated protein kinase c (rack1) protein_coding supercont1.786:363989-371129:1 gene:AAEL013069	35404.8	7.8
21257	906.525	41.3	41.29	134.996	2404	2548	3365	3582			3411	3628						8	ADLIAYLK		PEP_FRAG_1	97	104	b3b4b5b6y1y2y3y4y8	9	8.2162	8.2162	0	6	6	906.527	4815	1.18	1	0.223	41.4241	41.2561	41.3852	41.4547	41.5838	AAEL004457-PA,AAEL004457-PB,AAEL004457-PC	AAEL004457-PA,AAEL004457-PB,AAEL004457-PC	AAEL004457-PA	AAEL004457-PA	AAEL004457-PA	AAEL004457-PA	cytochrome c protein_coding supercont1.120:1912200-1912526:-1 gene:AAEL004457	11874.6	9.88
21284	907.486	17.51	17.54	48.1067											4493	1172	1750	13	ISMAGVTTK		PEP_FRAG_1	407	415	b4b9y3y5y7y8y9	7	7.3696	7.3696	0	2	2	907.486	1751	1.8	2	0.3108	17.4787	17.2977	17.442	17.5198	17.6641	AAEL002399-PA	AAEL002399-PA	AAEL002399-PA	AAEL002399-PA	AAEL002399-PA	AAEL002399-PA	aspartate aminotransferase protein_coding supercont1.55:1678877-1701605:-1 gene:AAEL002399	47718.5	9.26
21285	907.484	24.74	24.98	49.662											2543			11	FLTGDLGGK		PEP_FRAG_1	373	381	b7b8°y2y3y6°	5	5.8906	6.1178	0.0036	1	2	907.484	2543	2	2	0.1935	24.74	24.547	24.6994	24.7816	24.934	AAEL000454-PB,AAEL000454-PA	AAEL000454-PB,AAEL000454-PA	AAEL000454-PA	AAEL000454-PA	AAEL000454-PA	AAEL000454-PA	isocitrate dehydrogenase protein_coding supercont1.8:2789239-2803481:-1 gene:AAEL000454	44068.7	8.58
21290	907.487	27.63	27.66	127.503	3622	3642		2386			2361	2251						2	DLYNAIAK		PEP_FRAG_1	260	267	b5b5*y2y3y6y6*y7y8	8	7.3773	7.3773	0	3	4	907.489	3007	1.31	1	0.2941	27.487	27.2927	27.4475	27.531	27.6858	AAEL013407-PA,AAEL013407-PB	AAEL013407-PA,AAEL013407-PB
21292	907.489	39.49	39.52	133.596											1836	4158	4282	13	DLYNAIAK		PEP_FRAG_1	260	267	b5b5°b7°b8b8*y3y8	7	5.1391	7.3773	0	1	4	907.487	5276	1	1	0.2813	39.4727	39.2307	39.4213	39.524	39.7145	AAEL013407-PB,AAEL013407-PA	AAEL013407-PB,AAEL013407-PA
21345	908.477	37.17	37.31	49.265											4595			11	SIASLFDR		PEP_FRAG_1	435	442	b2b6y1y4y6	5	6.4384	7.396	0	1	6	908.477	4595	2	2	0.2045	37.1711	36.9758	37.1296	37.2126	37.3665	AAEL012778-PA,AAEL012778-PB	AAEL012778-PA,AAEL012778-PB	AAEL012778-PB	AAEL012778-PB	AAEL012778-PB	AAEL012778-PB	protease m1 zinc metalloprotease protein_coding supercont1.739:294698-297654:-1 gene:AAEL012778	102210	4.95
21346	908.483	25.34	25.37	131.57	11181	11789	6200	6758			13466	13648						1	SIASLFDR		PEP_FRAG_1	435	442	b3y1y3y5y5°y8	6	7.396	7.396	0	5	6	908.482	13074	1.26	1	0.3032	25.3805	25.2056	25.3436	25.418	25.556	AAEL012778-PB,AAEL012778-PA	AAEL012778-PB,AAEL012778-PA	AAEL012778-PB	AAEL012778-PB	AAEL012778-PB	AAEL012778-PB	protease m1 zinc metalloprotease protein_coding supercont1.739:294698-297654:-1 gene:AAEL012778	102210	4.95
21370	909.451	22.62	22.67	48.5855	2592	2973	3618	3663										4	WTFQATR		PEP_FRAG_1	309	315	b3b7*y3y4y5y6y7	7	7.1717	7.1717	0	4	5	909.452	2709	1.86	2	0.2325	22.5856	22.4009	22.5509	22.6318	22.7818	AAEL003318-PA	AAEL003318-PA	AAEL003318-PA	AAEL003318-PA	AAEL003318-PA	AAEL003318-PA	oligopeptide transporter protein_coding supercont1.83:2706598-2722216:-1 gene:AAEL003318	81916.6	4.89
21386	909.499	8.7	8.97	50.423													2062	13	LSVDYGKK		PEP_FRAG_1	157	164	y5y7	2	6.6905	7.0773	0	1	3	909.499	2062	2	2	0.2325	8.6965	8.5181	8.6611	8.7382	8.8811	AAEL013229-PA,AAEL006642-PA,AAEL012101-PA	AAEL013229-PA,AAEL006642-PA,AAEL012101-PA
21387	909.499	8.74	8.97	50.566												1478		12	LSVDYGKK		PEP_FRAG_1	157	164	b2y4y6y7	4	7.0773	7.0773	0	1	3	909.499	1478	2	2	0.2182	8.7406	8.5583	8.705	8.7841	8.9308	AAEL006642-PA,AAEL012101-PA,AAEL013229-PA	AAEL006642-PA,AAEL012101-PA,AAEL013229-PA
21429	910.538	47.13	47.13	135.769	2105	2039	3573	3260			2648	2865					1638	13	LFYLQVK		PEP_FRAG_1	113	119	b2b4b7y3y5y5*y7y7*	8	5.9667	5.9667	0.0038	3	4	910.539	1631	1	1	0.3185	47.0394	46.7916	46.99	47.0969	47.2953	AAEL007915-PA	AAEL007915-PA	AAEL007915-PA	AAEL007915-PA	AAEL007915-PA	AAEL007915-PA	Moesin/ezrin/radixin homolog 1 protein_coding supercont1.288:60426-136590:1 gene:AAEL007915	70275.7	5.81
21497	912.427	45.16	45.15	129.191	3699	3552	2728	2859			3197	3356						1	QYFASWK	Pyrrolidone carboxylic acid N-TERM(1)	VAR_MOD	340	346	b3b5b5°b6b6°b7y2y3y4y5y7	11	6.5927	6.5927	0.002	3	3	912.423	3165	1	1	0.2936	45.1907	44.9122	45.1309	45.2489	45.4676	AAEL006090-PA,AAEL006095-PA,AAEL006095-PB,AAEL006090-PB	AAEL006090-PA,AAEL006095-PA,AAEL006095-PB,AAEL006090-PB	AAEL006090-PA	AAEL006090-PA	AAEL006090-PA	AAEL006090-PA	Gelsolin precursor protein_coding supercont1.189:2008411-2031099:1 gene:AAEL006090	81911.9	4.72
21506	912.441	29.95	29.92	129.252												1494		12	FVEQFDK		PEP_FRAG_2	153	159	b4°y5y7	3	4.4625	6.6225	0.002	1	3	912.441	1494	1.15	1	0.2606	29.9539	29.7218	29.9059	30.0051	30.1892	AAEL000757-PB	AAEL000757-PB	AAEL000757-PB	AAEL000757-PB	AAEL000757-PB	AAEL000757-PB	anterior fat body protein protein_coding supercont1.16:3889508-3890623:1 gene:AAEL000757	33959.3	5.57
21516	912.442	19.1	19.08	47.8793	2463						3179	2304						8	FVEQFDK		PEP_FRAG_1	153	159	y5y5°y6y6*	4	6.6225	6.6225	0.002	2	3	912.44	2540	1.81	2	0.2599	19.1198	18.9538	19.0913	19.1655	19.303	AAEL000757-PB	AAEL000757-PB	AAEL000757-PB	AAEL000757-PB	AAEL000757-PB	AAEL000757-PB	anterior fat body protein protein_coding supercont1.16:3889508-3890623:1 gene:AAEL000757	33959.3	5.57
21579	913.509	31.38	31.34	129.738					3622	2938						2858		5	VVITVGDGPG		PEP_FRAG_2	539	548	b10°y8°y9°y10	4	4.8917	5.2727	0.0041	1	2	913.508	2166	1.41	1	0.2743	31.4566	31.2138	31.4026	31.5045	31.6933	AAEL010146-PB,AAEL010146-PA	AAEL010146-PB,AAEL010146-PA	AAEL010146-PA	AAEL010146-PA	AAEL010146-PA	AAEL010146-PA	3-hydroxyacyl-coa dehyrogenase protein_coding supercont1.456:129838-142680:1 gene:AAEL010146	82923.1	9.66
21633	914.519	50.27	50.33	127.806			3662	8576							1658		3678	4	IGVALELEA		PEP_FRAG_1	274	282	b4b5b6b6°b7y3	6	8.0857	8.0857	0	2	2	914.518	8561	1	1	0.2472	50.2963	50.0693	50.2459	50.3411	50.5177	AAEL001872-PA	AAEL001872-PA	AAEL001872-PA	AAEL001872-PA	AAEL001872-PA	AAEL001872-PA	voltage-dependent anion-selective channel protein_coding supercont1.44:690107-695296:-1 gene:AAEL001872	30810.3	8.87
21634	914.562	20.07	20.14	52.1768						5829					15406	7076	6491	13	QTVAVGVIK		PEP_FRAG_1	431	439	b2b3b3*b4b4*b6b6°b7°b9y4y5y6y7y9y9*	15	8.232	8.232	0	4	6	914.562	9657	1.83	2	0.2318	20.0731	19.8985	20.0362	20.1104	20.2481	AAEL017096-PA,AAEL017301-PA	AAEL017096-PA,AAEL017301-PA	AAEL017096-PA	AAEL017096-PA	AAEL017096-PA	AAEL017096-PA	hypothetical protein protein_coding supercont1.32:3146741-3148132:1 gene:AAEL017096	50815.3	9.44
21687	915.523	14.5	14.51	49.027											2204			11	VALETVQR		PEP_FRAG_1	501	508	b2y5*y7	3	6.0606	7.236	0	1	3	915.523	2204	2	2	0.1755	14.4952	14.3211	14.4593	14.5338	14.672	AAEL005733-PA	AAEL005733-PA	AAEL005733-PA	AAEL005733-PA	AAEL005733-PA	AAEL005733-PA	myosin heavy chain, nonmuscle or smooth muscle protein_coding supercont1.172:1163891-1178142:1 gene:AAEL005733	187875	5.42
21688	915.519	14.44	14.5	48.879													1017	13	VALETVQR		PEP_FRAG_1	501	508	b2b6°y7	3	6.2266	7.236	0	1	3	915.519	1017	2	2	0.2348	14.4407	14.2048	14.3898	14.4895	14.6745	AAEL005733-PA	AAEL005733-PA	AAEL005733-PA	AAEL005733-PA	AAEL005733-PA	AAEL005733-PA	myosin heavy chain, nonmuscle or smooth muscle protein_coding supercont1.172:1163891-1178142:1 gene:AAEL005733	187875	5.42
21726	916.468	14.18	14.23	50.9705			1233								2175	1097	1467	13	LGEAEIER		PEP_FRAG_1	150	157	b4y5y6y7	4	6.6057	6.6057	0.002	4	4	916.467	1477	2	2	0.1794	14.1595	13.9829	14.1198	14.1935	14.3304	AAEL005435-PB,AAEL005435-PA	AAEL005435-PB,AAEL005435-PA	AAEL005435-PA	AAEL005435-PA	AAEL005435-PA	AAEL005435-PA	mitochondrial processing peptidase beta subunit protein_coding supercont1.156:1726989-1729306:1 gene:AAEL005435	52876.8	5.82
21858	918.445	29.1	29.1	128.86	1199		1278	1433			1079							3	DPFDSLPK		PEP_FRAG_2	275	282	b7°y5°y8	3	4.9673	5.1859	0.0043	1	2	918.447	1053	1	1	0.2364	29.1126	28.9254	29.0698	29.1476	29.2919	AAEL011288-PA	AAEL011288-PA	AAEL011288-PA	AAEL011288-PA	AAEL011288-PA	AAEL011288-PA	elongation factor 1 gamma protein_coding supercont1.563:142142-152240:1 gene:AAEL011288	49168	7.77
21893	918.503	21.48	21.46	51.2569			5310	4775	1883		3228	3196	5664	5574	5160	1470	1449	4	IIGMVTER		PEP_FRAG_1	377	384	b2b8y1y4y6y7y8	7	7.2462	7.2462	0	6	7	918.506	3711	1.8	2	0.3251	21.3674	21.1669	21.3228	21.4069	21.5629	AAEL001577-PA	AAEL001577-PA	AAEL001577-PA	AAEL001577-PA	AAEL001577-PA	AAEL001577-PA	conserved hypothetical protein protein_coding supercont1.36:1592900-1606012:1 gene:AAEL001577	98149	4.65
21916	919.475	31.48	31.56	50.6767		1504	2278	2089										3	CIWTAIR	Carbamidomethyl C(1)	PEP_FRAG_1	246	252	y4y5	2	6.4116	6.4116	0.0035	3	3	919.476	1882	2	2	0.2964	31.5984	31.3675	31.5526	31.6524	31.8375	AAEL003318-PA	AAEL003318-PA	AAEL003318-PA	AAEL003318-PA	AAEL003318-PA	AAEL003318-PA	oligopeptide transporter protein_coding supercont1.83:2706598-2722216:-1 gene:AAEL003318	81916.6	4.89
21919	919.493	19.3	19.34	49.2813	4393	4242	2104	2110			1668	1833			2155		1129	1	IQVFQER		PEP_FRAG_1	71	77	b2b7y3*y5y5*y6y6*y6°y7	9	6.9928	6.9928	0	2	4	919.492	4723	1.9	2	0.2536	19.3341	19.1609	19.2985	19.3727	19.5104	AAEL016984-PA,AAEL016984-PB	AAEL016984-PA,AAEL016984-PB	AAEL016984-PA	AAEL016984-PA	AAEL016984-PA	AAEL016984-PA	hypothetical protein protein_coding supercont1.157:405434-406432:-1 gene:AAEL016984	35611.8	8.37
22026	921.462	29.3	29.36	50.4413	2629	2074					1203							2	IEDFLER		PEP_FRAG_1	103	109	y1y3y5y6	4	6.2892	6.2892	0.0035	2	2	921.463	1694	2	2	0.2667	29.1693	28.9373	29.1192	29.2173	29.3993	AAEL001759-PA	AAEL001759-PA	AAEL001759-PA	AAEL001759-PA	AAEL001759-PA	AAEL001759-PA	40S ribosomal protein S9 protein_coding supercont1.42:2191729-2195698:1 gene:AAEL001759	22798.7	11.03
22181	924.435	28.78	28.78	128.004							8413							7	QLYDATVD		PEP_FRAG_2	172	179	b2b5b6°b7b7*b8*b8°y5y7	9	5.6527	5.6527	0.0038	1	2	924.435	8413	1	1	0.2186	28.783	28.5651	28.7373	28.8301	29.0023	AAEL008789-PA	AAEL008789-PA	AAEL008789-PA	AAEL008789-PA	AAEL008789-PA	AAEL008789-PA	apolipophorin-III, putative protein_coding supercont1.349:808698-809368:1 gene:AAEL008789	22183.2	5.45
22182	923.561	8.06	8.29	49.6304	2483	2616	2690	2530			3940	4140			2367	2099	2301	13	IIAPPERK		PEP_FRAG_1	330	337	b2y4y5y6y7	5	7.6244	7.6244	0	8	10	923.561	2341	2	2	0.1781	7.9848	7.8231	7.9485	8.0161	8.1416	AAEL001673-PA,AAEL001951-PA,AAEL004631-PA,AAEL005961-PA,AAEL005964-PA,AAEL011197-PA,AAEL011197-PB,AAEL001928-PA,AAEL009451-PA	AAEL001673-PA,AAEL001951-PA,AAEL004631-PA,AAEL005961-PA,AAEL005964-PA,AAEL011197-PA,AAEL011197-PB,AAEL001928-PA,AAEL009451-PA
22189	924.465	15.76	15.68	129.906								1072						8	AVLDEYSK		PEP_FRAG_2	272	279	y3y4y8	3	6.6398	6.8486	0.0005	1	2	924.465	1072	1	1	0.2683	15.7647	15.5657	15.7171	15.7988	15.9503	AAEL000392-PB,AAEL009524-PA,AAEL000392-PA	AAEL000392-PB,AAEL009524-PA,AAEL000392-PA
22442	929.416	20.37	20.39	50.8543	1358		2364	2182										4	LMEYSMR		PEP_FRAG_1	552	558	y1y4y5y6	4	6.7029	6.7029	0.0009	3	4	929.417	1610	2	2	0.2624	20.327	20.1005	20.2737	20.3671	20.5403	AAEL003318-PA	AAEL003318-PA	AAEL003318-PA	AAEL003318-PA	AAEL003318-PA	AAEL003318-PA	oligopeptide transporter protein_coding supercont1.83:2706598-2722216:-1 gene:AAEL003318	81916.6	4.89
22468	929.517	21.07	21.11	51.8546					1841	2061					2574	3132	3111	13	CPIIAVTR	Carbamidomethyl C(1)	PEP_FRAG_1	436	443	b3y4y5y6y7	5	6.6758	6.6758	0.0009	4	4	929.515	3214	2	2	0.2565	21.0383	20.819	20.9918	21.085	21.2578	AAEL012576-PA,AAEL012576-PB,AAEL014913-PA	AAEL012576-PA,AAEL012576-PB,AAEL014913-PA
22473	929.448	34.69	34.67	133.685			8085	7740	3054	2752	1599	1453	12972	12917	1779	4297	4268	4	YGFMGLKN		MISSING_CLEAVAGE	546	553	y5y6y8	3	4.9633	4.9633	0.0043	2	2	929.446	7398	1.11	1	0.302	34.5791	34.3802	34.5383	34.6235	34.7816	AAEL000732-PA	AAEL000732-PA	AAEL000732-PA	AAEL000732-PA	AAEL000732-PA	AAEL000732-PA	conserved hypothetical protein protein_coding supercont1.15:1357702-1359408:1 gene:AAEL000732	65206.4	5.95
22499	929.559	35.54	35.55	49.7277	1177	1620	1795	1627	5043	5777	2056	2246			11889	5094	4371	12	ISVLADALK		PEP_FRAG_2	4	12	b2b3°y3y4y5y6y7y8y9	9	7.0826	7.0826	0	6	6	929.558	5385	1.87	2	0.3654	35.6081	35.4272	35.5721	35.6503	35.7952	AAEL009151-PB,AAEL009151-PA	AAEL009151-PB,AAEL009151-PA	AAEL009151-PA	AAEL009151-PA	AAEL009151-PA	AAEL009151-PA	40S ribosomal protein S8 protein_coding supercont1.373:398773-416256:-1 gene:AAEL009151	14829.4	10.41
22574	931.477	14.11	14.18	50.798											2530			11	EQLGISER		PEP_FRAG_1	1361	1368	b2°y3y5y6	4	6.5227	6.5227	0.0023	1	2	931.477	2530	2	2	0.217	14.1104	13.9415	14.0789	14.1529	14.2903	AAEL005656-PA,AAEL005733-PA	AAEL005656-PA,AAEL005733-PA
22586	931.482	19.37	19.36	51.9166			7196	6652	2609	2922			10388	10647		4458	4490	10	PPAYADLGK		PEP_FRAG_1	3	11	b3b4b6b9y2y3y4y5y6y7	10	8.5654	8.5654	0	6	7	931.485	5152	1.94	2	0.306	19.4302	19.2153	19.384	19.475	19.6438	AAEL001872-PA	AAEL001872-PA	AAEL001872-PA	AAEL001872-PA	AAEL001872-PA	AAEL001872-PA	voltage-dependent anion-selective channel protein_coding supercont1.44:690107-695296:-1 gene:AAEL001872	30810.3	8.87
22590	931.482	32.87	32.84	51.8253			10131	10404	6328	8033			20963	21874	5985	9863	9131	12	PPAYADLGK		PEP_FRAG_1	3	11	b4b5b6b9°y2y3y4y4°y5y5°y7y8y9	13	7.9121	8.5654	0	1	7	931.484	12455	1.97	2	0.3158	32.8847	32.6179	32.8269	32.9396	33.1486	AAEL001872-PA	AAEL001872-PA	AAEL001872-PA	AAEL001872-PA	AAEL001872-PA	AAEL001872-PA	voltage-dependent anion-selective channel protein_coding supercont1.44:690107-695296:-1 gene:AAEL001872	30810.3	8.87
22594	931.477	51.44	51.51	53.19		1740												2	FWYFLR		PEP_FRAG_1	15	20	y3y4y5y6	4	7.0632	7.0632	0	1	2	931.477	1740	1.8	2	0.2954	51.4445	51.2286	51.4005	51.4932	51.6652	AAEL006785-PB,AAEL006785-PA	AAEL006785-PB,AAEL006785-PA	AAEL006785-PA	AAEL006785-PA	AAEL006785-PA	AAEL006785-PA	60S ribosomal protein L18a protein_coding supercont1.221:70772-79136:-1 gene:AAEL006785	17993.9	11.14
22595	931.476	51.62	51.59	52.992	1767													1	FWYFLR		PEP_FRAG_1	15	20	y3y4y6	3	6.2107	7.0632	0	1	2	931.476	1767	2	2	0.287	51.6233	51.3541	51.5737	51.6921	51.9116	AAEL006785-PB,AAEL006785-PA	AAEL006785-PB,AAEL006785-PA	AAEL006785-PA	AAEL006785-PA	AAEL006785-PA	AAEL006785-PA	60S ribosomal protein L18a protein_coding supercont1.221:70772-79136:-1 gene:AAEL006785	17993.9	11.14
22620	931.52	38.42	38.44	50.4924			3356	3196			2745	2190			1778			3	YVFLVYK		PEP_FRAG_2	145	151	b2b3b4y5	4	6.7444	6.7444	0.0009	2	2	931.519	2772	1.78	2	0.2369	38.47	38.2491	38.4196	38.5115	38.6819	AAEL007549-PA,AAEL012666-PA	AAEL007549-PA,AAEL012666-PA	AAEL007549-PA	AAEL007549-PA	AAEL007549-PA	AAEL007549-PA	phosphatidylethanolamine-binding protein protein_coding supercont1.262:1556897-1557532:-1 gene:AAEL007549	23327.3	7.3
22709	932.486	40.1	40.09	135.759	1306	1392					2175	1991						7	VYYFNVK		PEP_FRAG_1	6	12	b3b5*y4y6y7	5	5.8422	5.8422	0.0038	2	2	932.486	2539	1	1	0.3518	40.0708	39.8073	40.0109	40.1207	40.3243	AAEL011741-PA,AAEL011741-PB	AAEL011741-PA,AAEL011741-PB	AAEL011741-PA	AAEL011741-PA	AAEL011741-PA	AAEL011741-PA	glutathione transferase protein_coding supercont1.607:107190-117128:-1 gene:AAEL011741	23263.8	4.8
22735	933.511	38.34	38.31	134.293							1204	1103					1206	13	DNVFAIVR		PEP_FRAG_1	506	513	b2b4°y4y8	4	5.3445	6.5037	0.0023	1	3	933.51	1190	1.2	1	0.271	38.2678	38.0034	38.2146	38.3285	38.5396	AAEL003434-PA	AAEL003434-PA	AAEL003434-PA	AAEL003434-PA	AAEL003434-PA	AAEL003434-PA	alpha-amylase protein_coding supercont1.86:770929-772866:-1 gene:AAEL003434	68698.6	5.13
22736	933.51	38.18	38.35	51.201											4405			11	DNVFAIVR		PEP_FRAG_1	506	513	b2b2*b3b3°b5*b6y4y5y6y8	10	6.5037	6.5037	0.0023	1	3	933.51	4405	1.92	2	0.2213	38.1756	37.994	38.1342	38.2098	38.35	AAEL003434-PA	AAEL003434-PA	AAEL003434-PA	AAEL003434-PA	AAEL003434-PA	AAEL003434-PA	alpha-amylase protein_coding supercont1.86:770929-772866:-1 gene:AAEL003434	68698.6	5.13
22739	933.498	33.98	33.99	51.717	1551	1396	1272	1320	1963	1691	1362	1430			3839	2636	3033	13	SPIDFNLK		PEP_FRAG_2	249	256	b2y3y5y6y7y8*	6	6.1087	6.1087	0.0038	2	2	933.498	3042	1.9	2	0.2806	33.9327	33.7326	33.8838	33.9653	34.1166	AAEL000703-PA	AAEL000703-PA	AAEL000703-PA	AAEL000703-PA	AAEL000703-PA	AAEL000703-PA	glycogen phosphorylase protein_coding supercont1.14:1197142-1236568:1 gene:AAEL000703	97412.8	5.88
22742	933.509	40.62	40.61	133.406	3789	3979	5054	5415			4523	4257					1246	4	DNVFAIVR		PEP_FRAG_2	506	513	b6b8*y3y8y8*	5	6.094	6.5037	0.0023	1	3	933.507	4652	1.08	1	0.2519	40.5922	40.3619	40.5432	40.641	40.8223	AAEL003434-PA	AAEL003434-PA	AAEL003434-PA	AAEL003434-PA	AAEL003434-PA	AAEL003434-PA	alpha-amylase protein_coding supercont1.86:770929-772866:-1 gene:AAEL003434	68698.6	5.13
22746	933.532	28.48	28.49	50.2868	1505	1296	1255				2057	3000						2	LVQELGFK		PEP_FRAG_2	153	160	b4y5°y6y8	4	5.2822	5.2822	0.0038	2	2	933.535	1064	2	2	0.2195	28.3054	28.0859	28.257	28.3492	28.5203	AAEL009700-PB	AAEL009700-PB	AAEL009700-PB	AAEL009700-PB	AAEL009700-PB	AAEL009700-PB	beta lactamase domain protein_coding supercont1.420:490886-496993:1 gene:AAEL009700	39142.1	6.43
22779	934.426	20.13	20.16	51.0022					1922	2018					3895	2360	2389	12	FYDQFSK		PEP_FRAG_1	418	424	b4*y3y5y6y6°y7*	6	6.3309	6.3309	0.0035	2	4	934.428	2174	1.74	2	0.33	20.1712	19.9714	20.1301	20.2156	20.3743	AAEL011704-PA,AAEL011708-PA,AAEL014843-PA,AAEL014845-PA	AAEL011704-PA,AAEL011708-PA,AAEL014843-PA,AAEL014845-PA	AAEL011704-PA	AAEL011704-PA	AAEL011704-PA	AAEL011704-PA	heat shock protein protein_coding supercont1.604:23555-25702:1 gene:AAEL011704	81876.7	4.75
22782	934.431	24.19	24.21	51.4085	1818	2197					1953	2234						7	FYDQFSK		PEP_FRAG_2	418	424	b3°y6°	2	5.5838	6.3309	0.0035	1	4	934.43	2273	2	2	0.1963	24.2096	24.0156	24.1702	24.2536	24.4082	AAEL011704-PA,AAEL014843-PA,AAEL014845-PA,AAEL011708-PA	AAEL011704-PA,AAEL014843-PA,AAEL014845-PA,AAEL011708-PA	AAEL011704-PA	AAEL011704-PA	AAEL011704-PA	AAEL011704-PA	heat shock protein protein_coding supercont1.604:23555-25702:1 gene:AAEL011704	81876.7	4.75
22786	934.433	15.94	15.93	133.311	2514	2473	5257	4809			3000	2944	2657	2556				2	VGAEMNGRT		MISSING_CLEAVAGE	290	298	y4°y6°y8*y9	4	5.2087	5.2087	0.0043	2	2	934.432	2244	1.33	1	0.2538	15.9342	15.7387	15.8938	15.9775	16.1326	AAEL010014-PA	AAEL010014-PA	AAEL010014-PA	AAEL010014-PA	AAEL010014-PA	AAEL010014-PA	hypothetical protein protein_coding supercont1.446:955328-963629:-1 gene:AAEL010014	235001	4.44
22794	934.46	22.5	22.53	49.7473	2883	2592	5695	5499			2352	2503						3	SNKFYYI		MISSING_CLEAVAGE	202	208	b4b5y3y7*	4	5.5223	5.589	0.0038	1	2	934.459	5398	2	2	0.189	22.5143	22.3287	22.4776	22.5578	22.7067	AAEL001020-PA	AAEL001020-PA	AAEL001020-PA	AAEL001020-PA	AAEL001020-PA	AAEL001020-PA	anterior fat body protein protein_coding supercont1.21:2651498-2663812:-1 gene:AAEL001020	36963	5.23
22799	934.469	48.78	48.77	129.354	6884	5963	11520	10270			4143	3967						2	LFAVEIDQ		PEP_FRAG_2	767	774	b5y4	2	5.5131	5.5131	0.0038	1	2	934.469	5324	1	1	0.2586	48.6978	48.4395	48.6432	48.753	48.9567	AAEL010014-PA	AAEL010014-PA	AAEL010014-PA	AAEL010014-PA	AAEL010014-PA	AAEL010014-PA	hypothetical protein protein_coding supercont1.446:955328-963629:-1 gene:AAEL010014	235001	4.44
22800	934.496	12.96	12.97	51.4624			2821	2495			2897	3152	3780	3745	1552			9	IIGMVTER	Oxidation M(4)	VAR_MOD	377	384	b4y4y6	3	6.4232	6.4232	0.0029	2	2	934.498	1846	2	2	0.2246	13.0446	12.8191	12.9948	13.0896	13.2653	AAEL001577-PA	AAEL001577-PA	AAEL001577-PA	AAEL001577-PA	AAEL001577-PA	AAEL001577-PA	conserved hypothetical protein protein_coding supercont1.36:1592900-1606012:1 gene:AAEL001577	98149	4.65
22801	934.455	27.96	27.93	47.7203	1945	2024	5559	5156	5447	5406	1263	1291	5603	5250		3886	4142	8	SNKFYYI		MISSING_CLEAVAGE	202	208	b4*b5b6*b7b7*	5	5.589	5.589	0.0038	1	2	934.454	1465	1.66	2	0.3095	28.0462	27.7298	27.9736	28.105	28.3488	AAEL001020-PA	AAEL001020-PA	AAEL001020-PA	AAEL001020-PA	AAEL001020-PA	AAEL001020-PA	anterior fat body protein protein_coding supercont1.21:2651498-2663812:-1 gene:AAEL001020	36963	5.23
22811	934.504	44.64	44.67	51.5877			1680	1330	3047	3313					7498	3755	4252	13	LGLMEMIK		PEP_FRAG_1	232	239	b6°y2y3y5y6y7	6	7.2643	7.2643	0	5	5	934.506	5280	1.9	2	0.2574	44.5744	44.385	44.5319	44.6112	44.7581	AAEL001593-PA,AAEL001593-PC,AAEL001593-PB	AAEL001593-PA,AAEL001593-PC,AAEL001593-PB	AAEL001593-PC	AAEL001593-PC	AAEL001593-PC	AAEL001593-PC	glycerol-3-phosphate dehydrogenase protein_coding supercont1.36:2657332-2706248:1 gene:AAEL001593	38748	6.49
22893	935.5	29.66	29.7	134.718			3856	4104		3913								3	SAPCIFLK	Carbamidomethyl C(4)	PEP_FRAG_1	189	196	b5°b6°y6y8	4	6.8594	7.3006	0	1	7	935.5	3244	1	1	0.2514	29.728	29.4759	29.6629	29.7637	29.9506	AAEL010145-PC,AAEL010145-PA,AAEL010145-PB	AAEL010145-PC,AAEL010145-PA,AAEL010145-PB
22894	935.499	29.77	29.71	51.0146					4199				5913	5529	16741	3728		11	SAPCIFLK	Carbamidomethyl C(4)	PEP_FRAG_1	189	196	b2b3°y2y5y6y8	6	7.3006	7.3006	0	5	7	935.498	17826	1.94	2	0.2955	29.4532	29.2085	29.4	29.5032	29.6947	AAEL010145-PB,AAEL010145-PA,AAEL010145-PC	AAEL010145-PB,AAEL010145-PA,AAEL010145-PC
22895	935.506	29.63	29.66	134.277													4525	13	SAPCIFLK	Carbamidomethyl C(4)	PEP_FRAG_2	189	196	b3°b5°b6°y3y5y6y8	7	6.9426	7.3006	0	1	7	935.506	4525	1.49	1	0.2747	29.6337	29.3583	29.566	29.678	29.8857	AAEL010145-PA,AAEL010145-PB,AAEL010145-PC	AAEL010145-PA,AAEL010145-PB,AAEL010145-PC
22975	936.458	13.08	13.09	49.352											3101	1068	1217	13	IMLGTCNK	Carbamidomethyl C(6)	PEP_FRAG_1	417	424	y3y5y6y7y7°	5	6.7811	6.7811	0.0005	2	3	936.457	1228	2	2	0.2216	13.0511	12.8378	13.0098	13.1026	13.2746	AAEL005432-PA,AAEL005432-PB	AAEL005432-PA,AAEL005432-PB	AAEL005432-PA	AAEL005432-PA	AAEL005432-PA	AAEL005432-PA	conserved hypothetical protein protein_coding supercont1.156:203935-218893:-1 gene:AAEL005432	162199	5.24
22979	936.463	28.41	28.4	49.017			11152											3	IMLGTCNK	Carbamidomethyl C(6)	PEP_FRAG_1	417	424	b8b8*y4*y5y7y8	6	6.1742	6.7811	0.0005	1	3	936.463	11152	1.85	2	0.2285	28.4108	28.2422	28.3748	28.4463	28.5788	AAEL005432-PB,AAEL005432-PA	AAEL005432-PB,AAEL005432-PA	AAEL005432-PA	AAEL005432-PA	AAEL005432-PA	AAEL005432-PA	conserved hypothetical protein protein_coding supercont1.156:203935-218893:-1 gene:AAEL005432	162199	5.24
22980	936.487	24.21	24.25	52.6184	1655	2098			5224	5412	2852	2645			2356	1543	1850	1	GVWVHPEI		PEP_FRAG_1	287	294	b2b7°y6	3	6.2316	6.2316	0.0035	2	3	936.487	1552	2	2	0.2824	24.2527	23.9717	24.1942	24.3141	24.5366	AAEL001005-PA	AAEL001005-PA	AAEL001005-PA	AAEL001005-PA	AAEL001005-PA	AAEL001005-PA	calreticulin protein_coding supercont1.20:3615914-3622930:-1 gene:AAEL001005	47012.6	4.22
22986	936.487	31.04	31.01	52.1087					2015	1819						1216	1360	5	IPFQEFR		PEP_FRAG_2	757	763	y3°y5y7*	3	4.4505	4.8834	0.0043	1	2	936.487	1205	2	2	0.261	31.1838	30.9925	31.1418	31.2222	31.3714	AAEL001411-PA,AAEL001411-PB	AAEL001411-PA,AAEL001411-PB	AAEL001411-PB	AAEL001411-PB	AAEL001411-PB	AAEL001411-PB	myosin heavy chain, nonmuscle or smooth muscle protein_coding supercont1.32:2748819-2897992:-1 gene:AAEL001411	232024	5.28
23001	936.473	20.34	20.34	49.3211	3742	3662	11527	11468	4676	4677	6774	6615	12184	12161	7317	3869	3950	8	ISEGVFER		PEP_FRAG_1	467	474	y2y3y3°y4y5y6y7y7°y8	9	7.8869	7.8869	0	12	12	936.474	9998	1.78	2	0.4136	20.4283	20.2477	20.3878	20.4633	20.6034	AAEL000859-PA	AAEL000859-PA	AAEL000859-PA	AAEL000859-PA	AAEL000859-PA	AAEL000859-PA	hypothetical protein protein_coding supercont1.18:904324-913065:-1 gene:AAEL000859	60718.8	4.83
23016	937.352	42.69	42.6	46.99								1081						8	DSEWTWN		PEP_FRAG_2	454	460	b4y4	2	5.6589	6.1104	0.0036	1	2	937.352	1081	1.77	2	0.293	42.6861	42.5634	42.6714	42.7296	42.8375	AAEL004369-PA	AAEL004369-PA	AAEL004369-PA	AAEL004369-PA	AAEL004369-PA	AAEL004369-PA	alpha-glucosidase protein_coding supercont1.116:695390-697368:1 gene:AAEL004369	73860.6	5.54
23020	937.384	40.35	40.42	127.301				2108										4	DSEWTWN		PEP_FRAG_2	454	460	b4°b7y3°y7	4	6.1104	6.1104	0.0036	1	2	937.384	2108	1	1	0.2485	40.3541	40.1138	40.2953	40.3932	40.5747	AAEL004369-PA	AAEL004369-PA	AAEL004369-PA	AAEL004369-PA	AAEL004369-PA	AAEL004369-PA	alpha-glucosidase protein_coding supercont1.116:695390-697368:1 gene:AAEL004369	73860.6	5.54
23029	937.502	15.42	15.42	50.712											1329			11	VVGFATTSR		PEP_FRAG_1	172	180	y6°y7	2	5.9155	5.9155	0.0038	1	4	937.502	1329	2	2	0.3536	15.4151	15.2176	15.3725	15.456	15.6109	AAEL011176-PA,AAEL015070-PA	AAEL011176-PA,AAEL015070-PA	AAEL015070-PA	AAEL015070-PA	AAEL015070-PA	AAEL015070-PA	alkaline phosphatase protein_coding supercont1.1446:21418-70765:-1 gene:AAEL015070	58629.8	5.78
23036	937.468	19.53	19.54	48.4047			1849	1838	4383	4302	1514	1558			6718	3243	3358	11	FGMINDLK		PEP_FRAG_2	327	334	y5y7	2	5.3466	6.581	0.002	1	5	937.471	5460	2	2	0.2024	19.4204	19.2621	19.3926	19.463	19.5935	AAEL003434-PA	AAEL003434-PA	AAEL003434-PA	AAEL003434-PA	AAEL003434-PA	AAEL003434-PA	alpha-amylase protein_coding supercont1.86:770929-772866:-1 gene:AAEL003434	68698.6	5.13
23037	937.477	28.67	28.75	51.066						1183								6	FGMINDLK		PEP_FRAG_2	327	334	y6y7*y8*	3	5.5776	6.581	0.002	1	5	937.477	1183	1.7	2	0.2305	28.6659	28.4745	28.6214	28.7006	28.8474	AAEL003434-PA	AAEL003434-PA	AAEL003434-PA	AAEL003434-PA	AAEL003434-PA	AAEL003434-PA	alpha-amylase protein_coding supercont1.86:770929-772866:-1 gene:AAEL003434	68698.6	5.13
23043	937.481	31.09	31.11	50.7692	1382	1852					2146	2368						1	NIWKDYV		MISSING_CLEAVAGE	660	666	b5*y5y7	3	5.2764	5.8227	0.0038	1	4	937.481	1222	2	2	0.2737	31.1338	30.8928	31.0773	31.1768	31.3614	AAEL000293-PA	AAEL000293-PA	AAEL000293-PA	AAEL000293-PA	AAEL000293-PA	AAEL000293-PA	ebna2 binding protein P100 protein_coding supercont1.5:4654759-4691495:1 gene:AAEL000293	104005	7.06
23046	937.507	33.9	33.91	50.4168	4583	3891	2962	2288			3146	3294						2	VVGFATTSR		PEP_FRAG_1	172	180	b4b5b9y9	4	4.8858	5.9155	0.0038	1	4	937.506	3175	2	2	0.2274	33.6872	33.4636	33.6427	33.7393	33.9183	AAEL015070-PA,AAEL011176-PA	AAEL015070-PA,AAEL011176-PA	AAEL015070-PA	AAEL015070-PA	AAEL015070-PA	AAEL015070-PA	alkaline phosphatase protein_coding supercont1.1446:21418-70765:-1 gene:AAEL015070	58629.8	5.78
23047	937.472	23.09	23.08	50.3224	1859	1833	5832	5584	1969	2055	2869	2563	5718	5396		1978	1887	7	NIWKDYV		MISSING_CLEAVAGE	660	666	b5°b6°b7y3y5	5	5.8227	5.8227	0.0038	3	4	937.473	3503	2	2	0.2622	23.0724	22.81	23.0165	23.1279	23.3344	AAEL000293-PA	AAEL000293-PA	AAEL000293-PA	AAEL000293-PA	AAEL000293-PA	AAEL000293-PA	ebna2 binding protein P100 protein_coding supercont1.5:4654759-4691495:1 gene:AAEL000293	104005	7.06
23066	937.483	58.66	58.65	45.091			2147	2533			4165	3473						7	FGMINDLK		PEP_FRAG_2	327	334	b6*b8y3y6°y8	5	5.3727	6.581	0.002	2	5	937.482	5935	1.75	2	0.2636	58.6541	58.4768	58.6178	58.6938	58.8349	AAEL003434-PA	AAEL003434-PA	AAEL003434-PA	AAEL003434-PA	AAEL003434-PA	AAEL003434-PA	alpha-amylase protein_coding supercont1.86:770929-772866:-1 gene:AAEL003434	68698.6	5.13
23092	938.471	33.92	33.98	51.2523											9096	4812	4302	13	MSDGLFLR		PEP_FRAG_1	240	247	y2y5y6y7y8	5	6.6525	6.6525	0.0009	3	3	938.471	5357	1.92	2	0.286	33.915	33.7336	33.8749	33.9511	34.0924	AAEL000454-PA,AAEL000454-PB	AAEL000454-PA,AAEL000454-PB	AAEL000454-PA	AAEL000454-PA	AAEL000454-PA	AAEL000454-PA	isocitrate dehydrogenase protein_coding supercont1.8:2789239-2803481:-1 gene:AAEL000454	44068.7	8.58
23101	938.487	21.18	21.22	51.2066	1472	1467			3001	3070		1101			8467	3136	3697	6	TTDGYLLR		PEP_FRAG_1	132	139	b6°y2y3y4y5y6y7y8	8	7.151	7.151	0	7	7	938.489	1746	2	2	0.2839	21.1303	20.9394	21.0922	21.1746	21.3275	AAEL005901-PA,AAEL013158-PA,AAEL005901-PB	AAEL005901-PA,AAEL013158-PA,AAEL005901-PB	AAEL005901-PA	AAEL005901-PA	AAEL005901-PA	AAEL005901-PA	40S ribosomal protein S3a protein_coding supercont1.179:1442348-1443131:1 gene:AAEL005901	25653.6	10.15
23166	939.56	32.97	32.97	138.779							4208							7	VPVVEAIGR		PEP_FRAG_2	195	203	b9y6°y8y9	4	5.6005	6.1336	0.0038	1	2	939.56	4208	1	1	0.1824	32.9718	32.7866	32.9303	33.0078	33.1515	AAEL010235-PA	AAEL010235-PA	AAEL010235-PA	AAEL010235-PA	AAEL010235-PA	AAEL010235-PA	30 kDa salivary gland allergen Aed a 3 Precursor (Allergen Aed a 3) protein_coding supercont1.464:161472-162363:1 gene:AAEL010235	29440.1	3.95
23167	939.561	33.08	32.97	139.029								4539						8	VPVVEAIGR		PEP_FRAG_1	195	203	b9y6°y8y8°y9	5	6.1336	6.1336	0.0038	1	2	939.561	4539	1	1	0.2258	33.0815	32.9074	33.0438	33.1173	33.2536	AAEL010235-PA	AAEL010235-PA	AAEL010235-PA	AAEL010235-PA	AAEL010235-PA	AAEL010235-PA	30 kDa salivary gland allergen Aed a 3 Precursor (Allergen Aed a 3) protein_coding supercont1.464:161472-162363:1 gene:AAEL010235	29440.1	3.95
23170	939.511	43.99	44.01	139.527	1251	1254	1901	1773										1	MLPYFLR		PEP_FRAG_1	632	638	y4y5y7	3	6.5621	6.5621	0.002	2	3	939.511	1061	1.3	1	0.252	44.0655	43.8237	44.0142	44.1168	44.3073	AAEL004369-PA	AAEL004369-PA	AAEL004369-PA	AAEL004369-PA	AAEL004369-PA	AAEL004369-PA	alpha-glucosidase protein_coding supercont1.116:695390-697368:1 gene:AAEL004369	73860.6	5.54
23172	939.507	43.84	43.96	53.571											2525			11	MLPYFLR		PEP_FRAG_1	632	638	b5y1y3y4	4	5.5965	6.5621	0.002	1	3	939.507	2525	2	2	0.2629	43.8441	43.5854	43.7925	43.9041	44.1112	AAEL004369-PA	AAEL004369-PA	AAEL004369-PA	AAEL004369-PA	AAEL004369-PA	AAEL004369-PA	alpha-glucosidase protein_coding supercont1.116:695390-697368:1 gene:AAEL004369	73860.6	5.54
23206	940.508	34.78	34.8	49.322					3505	2994					9556	2919	3160	6	VLSEAFFK		PEP_FRAG_1	845	852	y3y4y6y7	4	7.1372	7.1372	0	4	4	940.51	1780	2	2	0.2019	34.7151	34.5133	34.6722	34.7579	34.9169	AAEL011905-PA	AAEL011905-PA	AAEL011905-PA	AAEL011905-PA	AAEL011905-PA	AAEL011905-PA	myosin i protein_coding supercont1.629:71112-104195:1 gene:AAEL011905	120958	9.21
23217	941.42	41.12	41.24	52.328											1837			11	EMLDMFR		PEP_FRAG_1	527	533	y4y4°y5	3	6.021	6.021	0.0038	1	3	941.42	1837	2	2	0.3199	41.1162	40.9098	41.0746	41.1635	41.3283	AAEL009872-PA	AAEL009872-PA	AAEL009872-PA	AAEL009872-PA	AAEL009872-PA	AAEL009872-PA	alanine aminotransferase protein_coding supercont1.435:409834-445789:1 gene:AAEL009872	60490.7	8.23
23221	941.414	45.13	45.2	129.348		1413												2	EMLDMFR		PEP_FRAG_2	527	533	b3b7°y2y4y7	5	5.3398	6.021	0.0038	1	3	941.414	1413	1.16	1	0.242	45.1292	44.9568	45.0923	45.1654	45.301	AAEL009872-PA	AAEL009872-PA	AAEL009872-PA	AAEL009872-PA	AAEL009872-PA	AAEL009872-PA	alanine aminotransferase protein_coding supercont1.435:409834-445789:1 gene:AAEL009872	60490.7	8.23
23226	941.427	35.11	34.99	130.585								1260						8	EMLDMFR		PEP_FRAG_2	527	533	b3y6	2	5.4389	6.021	0.0038	1	3	941.427	1260	1	1	0.2818	35.1114	34.8162	35.0382	35.1578	35.3797	AAEL009872-PA	AAEL009872-PA	AAEL009872-PA	AAEL009872-PA	AAEL009872-PA	AAEL009872-PA	alanine aminotransferase protein_coding supercont1.435:409834-445789:1 gene:AAEL009872	60490.7	8.23
23228	941.416	20.29	20.31	49.1032	1611	1720	2977	2708			4042	4541						7	MLCAGFDK	Carbamidomethyl C(3)	PEP_FRAG_1	206	213	b3y2y5y6y7y8	6	7.139	7.139	0	6	6	941.417	5592	1.87	2	0.2315	20.3078	20.1078	20.2637	20.3477	20.5036	AAEL007601-PA,AAEL013707-PA,AAEL013715-PA	AAEL007601-PA,AAEL013707-PA,AAEL013715-PA
23342	943.471	53.58	53.58	129.21							2226							7	VSEVFSLY		PEP_FRAG_2	192	199	b8y4y5°	3	5.4179	5.4179	0.0038	1	4	943.471	2226	1	1	0.3168	53.5761	53.3465	53.528	53.6258	53.8073	AAEL005672-PA	AAEL005672-PA	AAEL005672-PA	AAEL005672-PA	AAEL005672-PA	AAEL005672-PA	adenosine deaminase protein_coding supercont1.169:649555-651184:-1 gene:AAEL005672	59985.4	6.38
23353	943.485	51.08	51.17	130.637						1002								6	VSEVFSLY		PEP_FRAG_2	192	199	b6y7y8	3	5.3179	5.4179	0.0038	1	4	943.485	1002	1	1	0.3561	51.0842	50.7268	51.0073	51.1585	51.4391	AAEL005672-PA	AAEL005672-PA	AAEL005672-PA	AAEL005672-PA	AAEL005672-PA	AAEL005672-PA	adenosine deaminase protein_coding supercont1.169:649555-651184:-1 gene:AAEL005672	59985.4	6.38
23356	943.485	72.38	72.3	85.682										1049				10	VSEVFSLY		PEP_FRAG_2	192	199	y6°y7	2	3.7198	5.4179	0.0038	1	4	943.485	1049	1	1	0.3755	72.3759	72.1073	72.2979	72.4008	72.5915	AAEL005672-PA	AAEL005672-PA	AAEL005672-PA	AAEL005672-PA	AAEL005672-PA	AAEL005672-PA	adenosine deaminase protein_coding supercont1.169:649555-651184:-1 gene:AAEL005672	59985.4	6.38
23404	944.522	7.67	7.95	51.0013											2665	3437	3902	11	TRLGADVGR		MISSING_CLEAVAGE	142	150	b6y6y9	3	7.0681	7.0681	0	2	2	944.524	1629	2	2	0.1622	7.6159	7.4564	7.5825	7.6505	7.7766	AAEL004855-PA,AAEL014127-PA	AAEL004855-PA,AAEL014127-PA
23432	944.524	31.41	31.42	48.8952	21530	23037	8881	9929	10754	10630	28201	27749			5800	1620	3022	7	AGLQFPVGR		PEP_FRAG_1	21	29	b3b4b4*b5y1y2y3y4y5y6y6*y7y7*y8y9	15	8.1003	8.1003	0	7	7	944.525	57754	1.85	2	0.2085	31.425	31.2379	31.3853	31.4648	31.6122	AAEL000494-PA,AAEL000518-PA,AAEL003687-PA,AAEL003818-PA,AAEL003826-PA,AAEL007005-PA,AAEL008385-PA,AAEL000497-PA,AAEL000525-PA,AAEL003820-PA,AAEL003851-PA,AAEL015390-PA,AAEL003669-PA,AAEL003706-PA,AAEL003862-PA,AAEL007609-PA	AAEL000494-PA,AAEL000518-PA,AAEL003687-PA,AAEL003818-PA,AAEL003826-PA,AAEL007005-PA,AAEL008385-PA,AAEL000497-PA,AAEL000525-PA,AAEL003820-PA,AAEL003851-PA,AAEL015390-PA,AAEL003669-PA,AAEL003706-PA,AAEL003862-PA,AAEL007609-PA	AAEL000494-PA	AAEL000494-PA	AAEL000494-PA	AAEL000494-PA	histone H2A protein_coding supercont1.9:3666585-3666959:1 gene:AAEL000494	13362.7	11.15
23456	945.495	15.51	15.52	50.9276					2788	2902					7627	3494	3234	5	TLLEQADR		PEP_FRAG_1	1689	1696	b2y1y4y5y6	5	6.7159	6.7159	0.0009	5	5	945.494	1610	2	2	0.3363	15.5951	15.3977	15.5513	15.6342	15.7878	AAEL005656-PA,AAEL005733-PA	AAEL005656-PA,AAEL005733-PA
23461	945.513	40.2	40.2	51.208							2021							7	GCLLDVIR	Carbamidomethyl C(2)	PEP_FRAG_1	220	227	y3y5y8	3	5.6478	6.4219	0.0029	1	2	945.513	2021	1.55	2	0.3029	40.2011	39.9403	40.1481	40.2602	40.468	AAEL010338-PA	AAEL010338-PA	AAEL010338-PA	AAEL010338-PA	AAEL010338-PA	AAEL010338-PA	conserved hypothetical protein protein_coding supercont1.472:773358-774183:-1 gene:AAEL010338	28678.5	4.53
23462	945.514	40.11	40.16	51.833				1280										4	GCLLDVIR	Carbamidomethyl C(2)	PEP_FRAG_1	220	227	b2b8°y1y4y5y6y7	7	6.4219	6.4219	0.0029	1	2	945.514	1280	1.51	2	0.2841	40.106	39.8494	40.05	40.1581	40.3587	AAEL010338-PA	AAEL010338-PA	AAEL010338-PA	AAEL010338-PA	AAEL010338-PA	AAEL010338-PA	conserved hypothetical protein protein_coding supercont1.472:773358-774183:-1 gene:AAEL010338	28678.5	4.53
23479	945.544	35.53	35.56	50.9926	4565	4782	1899	2187			1522	1961			7230			1	AVFPSIVGR		PEP_FRAG_1	30	38	y2y3y4y6y7y9	6	7.3218	7.3218	0	5	5	945.543	4231	1.78	2	0.2916	35.6167	35.4102	35.577	35.6669	35.8337	AAEL004616-PA	AAEL004616-PA	AAEL004616-PA	AAEL004616-PA	AAEL004616-PA	AAEL004616-PA	actin protein_coding supercont1.125:2451488-2452676:-1 gene:AAEL004616	42085	5.15
23486	946.425	8.16	8.31	50.1452			2504	2679			1176	1147						8	TGPTVEEVD		PEP_FRAG_2	630	638	b5b8	2	5.1932	5.1932	0.0043	1	2	946.428	1204	2	2	0.2425	8.2741	8.034	8.225	8.328	8.519	AAEL017973-PA,AAEL017974-PA,AAEL017975-PA,AAEL017979-PA	AAEL017973-PA,AAEL017974-PA,AAEL017975-PA,AAEL017979-PA	AAEL017973-PA	AAEL017973-PA	AAEL017973-PA	AAEL017973-PA	heat shock protein HSP70 protein_coding supercont1.680:378924-380840:-1 gene:AAEL017973	70808.8	5.69
23495	946.405	23.51	23.58	50.5442	2991	3068	3599	3766			1793				2396			4	DFMQYSR		PEP_FRAG_1	422	428	b2y1y2y3y4y4*y5y6y7y7*	10	7.8961	7.8961	0	5	6	946.402	2789	1.54	2	0.2887	23.5269	23.3605	23.4945	23.5667	23.7006	AAEL000667-PA,AAEL000667-PB	AAEL000667-PA,AAEL000667-PB	AAEL000667-PB	AAEL000667-PB	AAEL000667-PB	AAEL000667-PB	alpha-amylase protein_coding supercont1.13:1013259-1029340:-1 gene:AAEL000667	67228.9	5.2
23510	946.405	38.17	38.15	126.474	1262	2087	10652	11011			2821	2736	2481					9	DFMQYSR		PEP_FRAG_2	422	428	b6b7y2y6*y7	5	5.4707	7.8961	0	1	6	946.401	1128	1.23	1	0.2486	38.3073	38.0921	38.264	38.3566	38.5285	AAEL000667-PA,AAEL000667-PB	AAEL000667-PA,AAEL000667-PB	AAEL000667-PB	AAEL000667-PB	AAEL000667-PB	AAEL000667-PB	alpha-amylase protein_coding supercont1.13:1013259-1029340:-1 gene:AAEL000667	67228.9	5.2
23558	946.55	20.74	20.78	50.1546					4296	3296					11161	4116	4015	13	TVISQALSK		PEP_FRAG_1	254	262	b6y2°y3y6y7y9	6	7.3786	7.3786	0	5	7	946.551	4883	1.81	2	0.2397	20.6918	20.5042	20.6517	20.7312	20.8787	AAEL008787-PA	AAEL008787-PA	AAEL008787-PA	AAEL008787-PA	AAEL008787-PA	AAEL008787-PA	V-type proton ATPase catalytic subunit A (V-ATPase subunit A)(EC 3.6.3.14)(Vacuolar proton pump subunit alpha)(V-ATPase 69 kDa subunit) protein_coding supercont1.349:699238-710948:1 gene:AAEL008787	68571.2	5.08
23598	947.521	23.27	23.27	51.8062	1108	1214	1399		1854		1700	1815						8	FLSNLPEK		PEP_FRAG_2	1206	1213	b3y3°y8	3	5.4943	5.6765	0.0038	1	3	947.523	2034	1.81	2	0.2764	23.3698	23.1428	23.3164	23.41	23.5836	AAEL003655-PA	AAEL003655-PA	AAEL003655-PA	AAEL003655-PA	AAEL003655-PA	AAEL003655-PA	conserved hypothetical protein protein_coding supercont1.94:2210612-2215851:-1 gene:AAEL003655	186327	5.82
23605	947.562	34.86	34.86	52.6712	3578	3330	1285				1086							1	VLLGIGGYR		PEP_FRAG_1	107	115	b2y2y4y5y6y7y9	7	7.3422	7.3422	0	4	5	947.562	3125	1.87	2	0.4226	34.9312	34.7379	34.8905	34.9727	35.1253	AAEL002023-PA	AAEL002023-PA	AAEL002023-PA	AAEL002023-PA	AAEL002023-PA	AAEL002023-PA	imaginal disc growth factor protein_coding supercont1.47:1697432-1721392:-1 gene:AAEL002023	48312.9	8.3
23609	947.566	47.01	47.02	51.337					2272	1870					10895		4202	11	IIWQFIK		PEP_FRAG_1	55	61	y3y4y4*y5	4	6.8056	6.8056	0.0005	3	3	947.567	9699	2	2	0.2195	46.8701	46.672	46.8292	46.914	47.0712	AAEL012614-PA	AAEL012614-PA	AAEL012614-PA	AAEL012614-PA	AAEL012614-PA	AAEL012614-PA	NADP-specific isocitrate dehydrogenase protein_coding supercont1.717:238281-251630:1 gene:AAEL012614	37207.5	8.68
23635	948.496	33.51	33.5	55.8472						2715	1330	1110				2538	2291	13	IETTDVTAV		PEP_FRAG_2	525	533	b4y4y9	3	4.8029	5.5401	0.0038	1	2	948.494	2286	2	2	0.1897	33.4805	33.2984	33.4406	33.5173	33.6595	AAEL002178-PA	AAEL002178-PA	AAEL002178-PA	AAEL002178-PA	AAEL002178-PA	AAEL002178-PA	conserved hypothetical protein protein_coding supercont1.50:1514391-1523264:-1 gene:AAEL002178	60609.3	9.66
23640	948.491	47.16	47.18	53.5838						3341	1087	1060			4656		4622	13	GLFIIDDR		PEP_FRAG_2	166	173	y3y4°y8	3	5.3189	5.3189	0.0041	1	2	948.49	5921	2	2	0.2084	47.1129	46.9424	47.0783	47.1516	47.2876	AAEL014548-PA	AAEL014548-PA	AAEL014548-PA	AAEL014548-PA	AAEL014548-PA	AAEL014548-PA	Thioredoxin Peroxidase. protein_coding supercont1.1159:109828-128887:1 gene:AAEL014548	26981.6	6.87
23644	948.524	40.72	40.78	53.356											3920	2321	2848	12	WPLYTLR		PEP_FRAG_1	133	139	y3y5y6	3	6.286	6.286		1	1	948.523	2116	2	2	0.2688	40.8467	40.5807	40.7834	40.8926	41.0953
23665	948.509	30.53	30.52	51.7108	4931	5882	13478	14189	4980	5049	7542	7826	11116	12272	7191	3587	3527	4	FGELVEVR		PEP_FRAG_1	429	436	b2b3b4y1y2y3y3°y4y5y6y7y8	12	8.3396	8.3396	0	13	13	948.51	14779	1.91	2	0.2538	30.455	30.2647	30.4136	30.4939	30.6428	AAEL004369-PA	AAEL004369-PA	AAEL004369-PA	AAEL004369-PA	AAEL004369-PA	AAEL004369-PA	alpha-glucosidase protein_coding supercont1.116:695390-697368:1 gene:AAEL004369	73860.6	5.54
23666	949.457	28.01	28.05	50.1599	2917	2787	1411	1818			2612	1915			1813			8	SLDDVWSK		PEP_FRAG_1	209	216	b2b3b4b4°b5b6y2y5y6y8	10	6.9562	6.9562	0	4	4	949.458	2173	1.66	2	0.3448	28.1551	27.8079	28.0795	28.226	28.4976	AAEL005672-PA	AAEL005672-PA	AAEL005672-PA	AAEL005672-PA	AAEL005672-PA	AAEL005672-PA	adenosine deaminase protein_coding supercont1.169:649555-651184:-1 gene:AAEL005672	59985.4	6.38
23679	949.461	15.3	15.31	50.849			5824	6200	4611	4677	3519	3585	9129	8765	10551	4955	5085	4	TVCDVDIK	Carbamidomethyl C(3)	PEP_FRAG_1	166	173	y2y3y4y5y6y7y8	7	7.8487	7.8487	0	11	11	949.459	5160	1.87	2	0.2404	15.2213	15.0462	15.1868	15.2626	15.4033	AAEL010145-PB,AAEL010145-PC,AAEL010145-PA	AAEL010145-PB,AAEL010145-PC,AAEL010145-PA
23738	950.457	41.55	41.54	129.326	4309	3744	1917	2179			4165	3760						7	SAVDFANNL		PEP_FRAG_1	303	311	b4b5b6b8*b9*y3*y6	7	6.4323	6.4323	0.0029	4	4	950.457	5977	1	1	0.2485	41.5462	41.3433	41.5031	41.5893	41.7492	AAEL008620-PA	AAEL008620-PA	AAEL008620-PA	AAEL008620-PA	AAEL008620-PA	AAEL008620-PA	D7 protein, putative protein_coding supercont1.336:1106349-1107354:-1 gene:AAEL008620	35780.9	5.04
23740	950.483	31.67	31.61	50.7595			3730	3297					3108	2405				9	VQTVDNFK		PEP_FRAG_2	224	231	y3*y7°y8	3	5.5896	7.3728	0	1	10	950.482	1418	2	2	0.3151	31.878	31.61	31.8171	31.9287	32.1358	AAEL009081-PA	AAEL009081-PA	AAEL009081-PA	AAEL009081-PA	AAEL009081-PA	AAEL009081-PA	conserved hypothetical protein protein_coding supercont1.368:573444-575036:-1 gene:AAEL009081	58634.5	6.23
23778	950.488	13.36	13.38	50.1252	2263	2270	3314	3512	2508	2046	3059	2989	2089	2408	6798	3324	3545	3	VQTVDNFK		PEP_FRAG_1	224	231	b2y3y4y5y6	5	7.3728	7.3728	0	8	10	950.488	2780	2	2	0.201	13.3185	13.1253	13.2759	13.3571	13.5077	AAEL009081-PA	AAEL009081-PA	AAEL009081-PA	AAEL009081-PA	AAEL009081-PA	AAEL009081-PA	conserved hypothetical protein protein_coding supercont1.368:573444-575036:-1 gene:AAEL009081	58634.5	6.23
23781	951.477	20.3	20.29	132.809	3461			1626			4508	4880						7	DLNAEVYK		PEP_FRAG_1	165	172	b3b4b5b5*b6b6°y2y3y4y4°y5y6y6°y8	14	8.2188	8.2188	0	3	5	951.479	6465	1.31	1	0.3744	20.3071	20.151	20.2729	20.3387	20.4607	AAEL003734-PA,AAEL012897-PA	AAEL003734-PA,AAEL012897-PA	AAEL003734-PA	AAEL003734-PA	AAEL003734-PA	AAEL003734-PA	aconitase, mitochondrial protein_coding supercont1.95:2766128-2774361:-1 gene:AAEL003734	88189.3	8.47
23782	951.472	20.23	20.31	52.6455		3227									5340	1569	1689	2	DLNAEVYK		PEP_FRAG_2	165	172	b3b4b4*b5b5*y6y6*y8	8	6.8926	8.2188	0	2	5	951.469	2816	1.49	2	0.2781	20.2161	20.0135	20.1667	20.2493	20.4025	AAEL003734-PA,AAEL012897-PA	AAEL003734-PA,AAEL012897-PA	AAEL003734-PA	AAEL003734-PA	AAEL003734-PA	AAEL003734-PA	aconitase, mitochondrial protein_coding supercont1.95:2766128-2774361:-1 gene:AAEL003734	88189.3	8.47
23796	951.501	50.72	50.68	50.9809			2288	1619	5040	5163			3354	2726	5387			6	FPLFGGWK		PEP_FRAG_2	304	311	y5y6y7	3	5.409	5.409	0.0038	3	3	951.499	3279	2	2	0.2996	50.5408	50.2356	50.4715	50.5988	50.8347	AAEL013071-PA	AAEL013071-PA	AAEL013071-PA	AAEL013071-PA	AAEL013071-PA	AAEL013071-PA	ribophorin protein_coding supercont1.786:405654-418030:1 gene:AAEL013071	52355.3	8.86
23846	952.555	43.35	43.35	52.1288	1811	1293	4489	4363			1404	1523						4	LLFQIYR		PEP_FRAG_1	627	633	b3b6*b7*y3y4y4*y5y6y7	9	6.9901	6.9901	0	4	4	952.556	3551	1.84	2	0.2597	43.2387	43.0421	43.1983	43.2825	43.4387	AAEL010912-PA	AAEL010912-PA	AAEL010912-PA	AAEL010912-PA	AAEL010912-PA	AAEL010912-PA	dipeptidyl-peptidase protein_coding supercont1.519:212381-218433:1 gene:AAEL010912	90311.2	5.88
23879	953.479	34.95	35.01	51.6773											7009	2471	2703	12	LAANDFFR		PEP_FRAG_1	92	99	y2y3y5y6y7	5	5.9988	5.9988	0.0038	3	3	953.48	2247	2	2	0.257	35.054	34.863	35.0199	35.1044	35.2613	AAEL011276-PA	AAEL011276-PA	AAEL011276-PA	AAEL011276-PA	AAEL011276-PA	AAEL011276-PA	mitochondrial glutamate carrier protein protein_coding supercont1.562:111453-123360:1 gene:AAEL011276	34340.4	9.95
23936	953.598	37.14	37.14	53.2955	19527	18958	10651	10873	7100	6504	31447	32161			11896	3157	3433	8	LLLPGELAK		PEP_FRAG_1	308	316	b2b3b6b7y2y3y4y5y6y6°y7y8y9	13	8.5352	8.5352	0	10	10	953.602	64054	1.7	2	0.2376	37.3038	37.0967	37.2591	37.3467	37.5091	AAEL015675-PA,AAEL015677-PA,AAEL015678-PA,AAEL015680-PA,AAEL015681-PA,AAEL015683-PA,AAEL015674-PA,AAEL015679-PA,AAEL015682-PA,AAEL015676-PA,AAEL015684-PA	AAEL015675-PA,AAEL015677-PA,AAEL015678-PA,AAEL015680-PA,AAEL015681-PA,AAEL015683-PA,AAEL015674-PA,AAEL015679-PA,AAEL015682-PA,AAEL015676-PA,AAEL015684-PA	AAEL015683-PA	AAEL015683-PA	AAEL015683-PA	AAEL015683-PA	histone H2B protein_coding supercont1.94:2272257-2272628:-1 gene:AAEL015683	13627.9	10.66
23960	954.462	33	32.99	51.093	3528	5653	6615	10170				3096	3171	3066	2756		1349	3	AAFDEFVR		PEP_FRAG_1	717	724	y1y2y4y5y6y7	6	7.5584	7.5584	0	8	9	954.463	6595	2	2	0.2306	33.0229	32.8387	32.9838	33.062	33.2071	AAEL005821-PA	AAEL005821-PA	AAEL005821-PA	AAEL005821-PA	AAEL005821-PA	AAEL005821-PA	alanyl aminopeptidase protein_coding supercont1.175:1864852-1877095:1 gene:AAEL005821	107673	4.98
23994	955.518	27.93	27.99	51.0532	1485	1448					1172	1095			4993			11	ALVSFYQK		PEP_FRAG_1	93	100	b3y3y4*y5y6	5	6.6772	6.6772	0.0009	3	4	955.518	3550	2	2	0.28	27.7361	27.4769	27.6831	27.7942	28.0004	AAEL003427-PA	AAEL003427-PA	AAEL003427-PA	AAEL003427-PA	AAEL003427-PA	AAEL003427-PA	40S ribosomal protein S16 protein_coding supercont1.86:2306207-2309920:-1 gene:AAEL003427	16862.7	10.6
24003	955.517	42.67	42.65	54.8372	1716	1356	1803				2022	1225						7	ALVSFYQK		PEP_FRAG_1	93	100	b4°y2*y5*	3	5.1304	6.6772	0.0009	1	4	955.519	2370	1.74	2	0.2495	42.6436	42.4369	42.5955	42.6809	42.8395	AAEL003427-PA	AAEL003427-PA	AAEL003427-PA	AAEL003427-PA	AAEL003427-PA	AAEL003427-PA	40S ribosomal protein S16 protein_coding supercont1.86:2306207-2309920:-1 gene:AAEL003427	16862.7	10.6
24035	956.47	38.61	38.6	133.899	2335	2165	1325	1353			1395	1340						2	EAFSLFDK		PEP_FRAG_1	15	22	b4b6b6°b8y2y3y5y6y7°y8	10	7.2053	7.2053	0	4	4	956.472	1738	1.44	1	0.307	38.483	38.2659	38.4416	38.5364	38.7122	AAEL012326-PA	AAEL012326-PA	AAEL012326-PA	AAEL012326-PA	AAEL012326-PA	AAEL012326-PA	calmodulin protein_coding supercont1.678:468840-567462:1 gene:AAEL012326	16810.6	3.88
24039	956.525	15.02	15.05	55.1565	2235	1971	1573			5617	2230	2486				3400	3613	13	HVVFIGER		PEP_FRAG_1	89	96	b2b6y2°y3y4y5y6y7	8	5.9282	5.9282	0.0038	2	2	956.526	4202	2	2	0.3612	14.8979	14.5418	14.8263	14.9797	15.2642	AAEL009496-PA	AAEL009496-PA	AAEL009496-PA	AAEL009496-PA	AAEL009496-PA	AAEL009496-PA	40S ribosomal protein S7 protein_coding supercont1.401:451350-456600:-1 gene:AAEL009496	22105.8	10.34
24044	956.535	27.58	27.6	52.9893	2496	2597	2865	2740			3045	2975						4	DISLGNPIK		PEP_FRAG_2	328	336	b2b8*y4*y9	4	4.8086	5.5822	0.0038	1	3	956.533	2053	2	2	0.2678	27.5685	27.3879	27.5318	27.6093	27.7532	AAEL010014-PA	AAEL010014-PA	AAEL010014-PA	AAEL010014-PA	AAEL010014-PA	AAEL010014-PA	hypothetical protein protein_coding supercont1.446:955328-963629:-1 gene:AAEL010014	235001	4.44
24055	956.57	24.91	24.95	50.7793	1957	2221	2249	3025			2761	2755						7	VALGEIVQK		PEP_FRAG_2	335	343	b3b8*b8°y6y9	5	6.7889	6.7889	0.0005	5	5	956.569	3332	1.75	2	0.2335	24.9325	24.7546	24.8919	24.9659	25.1032	AAEL002704-PB	AAEL002704-PB	AAEL002704-PB	AAEL002704-PB	AAEL002704-PB	AAEL002704-PB	Serine Protease Inhibitor (serpin) homologue protein_coding supercont1.65:1197986-1199365:-1 gene:AAEL002704	48181.7	6.26
24172	959.406	12.68	12.7	51.6855	5905	6415	2280	1777			1379	1506						2	FTEEDYR		PEP_FRAG_1	23	29	b2y2y3y4y5y5°y6y7	8	7.7955	7.7955	0	6	6	959.404	6954	1.91	2	0.2146	12.7262	12.5402	12.6889	12.7691	12.9179	AAEL018102-PA	AAEL018102-PA	AAEL018102-PA	AAEL018102-PA	AAEL018102-PA	AAEL018102-PA	hypothetical protein protein_coding supercont1.115:999082-999569:-1 gene:AAEL018102	16552.5	5.25
24192	959.475	16.88	16.86	51.269	1598	1612					1533	1192						1	DVQEELAR		PEP_FRAG_2	11	18	b8°y3y4y5y6y6*y8	7	6.8327	6.8327	0.0005	2	2	959.47	1602	1.69	2	0.22	16.854	16.7185	16.8289	16.8884	16.9987	AAEL005766-PA,AAEL005766-PB	AAEL005766-PA,AAEL005766-PB	AAEL005766-PB	AAEL005766-PB	AAEL005766-PB	AAEL005766-PB	fructose-bisphosphate aldolase protein_coding supercont1.174:169509-197538:-1 gene:AAEL005766	39997.5	8.17
24202	959.492	17.81	17.81	50.9205	3054	2593	5204	5120			3600	3569						1	EAPTTAELK		PEP_FRAG_2	104	112	b3y5y7°	3	5.6707	5.6707	0.0038	1	2	959.49	3046	2	2	0.2376	17.8018	17.6068	17.76	17.8426	17.9958	AAEL009658-PA,AAEL009658-PB,AAEL009658-PC	AAEL009658-PA,AAEL009658-PB,AAEL009658-PC	AAEL009658-PB	AAEL009658-PB	AAEL009658-PB	AAEL009658-PB	alpha,alpha-trehalase protein_coding supercont1.416:220712-250040:-1 gene:AAEL009658	67353.2	4.99
24204	959.505	30.27	30.3	134.95													1512	13	EAPTTAELK		PEP_FRAG_2	104	112	b3y1y7y9	4	5.4005	5.6707	0.0038	1	2	959.505	1512	1.36	1	0.3903	30.2681	30.0534	30.2234	30.3151	30.4852	AAEL009658-PB,AAEL009658-PA,AAEL009658-PC	AAEL009658-PB,AAEL009658-PA,AAEL009658-PC	AAEL009658-PB	AAEL009658-PB	AAEL009658-PB	AAEL009658-PB	alpha,alpha-trehalase protein_coding supercont1.416:220712-250040:-1 gene:AAEL009658	67353.2	4.99
24224	959.519	48.64	48.68	136.339					10316	9935					18542		15285	11	QIFLGGVDK	Pyrrolidone carboxylic acid N-TERM(1)	VAR_MOD	100	108	b3b4b5b5*b6b7b9*y2y3y4y5y6y7y9	14	8.5008	8.5008	0	4	4	959.518	19235	1.37	1	0.2266	48.562	48.392	48.5259	48.5981	48.7321	AAEL004855-PA	AAEL004855-PA	AAEL004855-PA	AAEL004855-PA	AAEL004855-PA	AAEL004855-PA	ADP,ATP carrier protein protein_coding supercont1.132:1668937-1682495:1 gene:AAEL004855	33237.4	9.96
24226	959.581	11.95	11.88	52.101								3127						8	STELLIRK		PEP_FRAG_1	58	65	y4y5y6y6°y7°	5	5.6055	6.154	0.0038	1	2	959.581	3127	2	2	0.2502	11.9514	11.7336	11.9028	11.994	12.1632	AAEL000482-PA,AAEL000506-PA,AAEL003827-PA,AAEL003850-PA,AAEL003856-PA,AAEL003685-PA,AAEL003836-PA,AAEL011424-PA,AAEL000492-PA,AAEL003659-PA,AAEL003828-PA,AAEL003852-PA,AAEL006158-PA,AAEL012072-PA	AAEL000482-PA,AAEL000506-PA,AAEL003827-PA,AAEL003850-PA,AAEL003856-PA,AAEL003685-PA,AAEL003836-PA,AAEL011424-PA,AAEL000492-PA,AAEL003659-PA,AAEL003828-PA,AAEL003852-PA,AAEL006158-PA,AAEL012072-PA	AAEL003827-PA	AAEL003827-PA	AAEL003827-PA	AAEL003827-PA	histone H3 protein_coding supercont1.98:875588-875992:-1 gene:AAEL003827	15175.7	11.56
24227	959.584	11.88	11.88	52.049							2816							7	STELLIRK		PEP_FRAG_1	58	65	y3y4y5y8	4	6.154	6.154	0.0038	1	2	959.584	2816	2	2	0.2107	11.8772	11.6681	11.832	11.9203	12.0841	AAEL003659-PA,AAEL003828-PA,AAEL006158-PA,AAEL012072-PA,AAEL000482-PA,AAEL000506-PA,AAEL003827-PA,AAEL003850-PA,AAEL003856-PA,AAEL003685-PA,AAEL003836-PA,AAEL000492-PA,AAEL003852-PA,AAEL011424-PA	AAEL003659-PA,AAEL003828-PA,AAEL006158-PA,AAEL012072-PA,AAEL000482-PA,AAEL000506-PA,AAEL003827-PA,AAEL003850-PA,AAEL003856-PA,AAEL003685-PA,AAEL003836-PA,AAEL000492-PA,AAEL003852-PA,AAEL011424-PA	AAEL003827-PA	AAEL003827-PA	AAEL003827-PA	AAEL003827-PA	histone H3 protein_coding supercont1.98:875588-875992:-1 gene:AAEL003827	15175.7	11.56
24251	960.468	36.09	36.09	135.407							2479							7	ADNWWLR		PEP_FRAG_1	460	466	b3b6*b7y1y4y7	6	6.0507	6.3131	0.0035	1	2	960.468	2479	1.11	1	0.3477	36.087	35.8528	36.0394	36.14	36.3266	AAEL012825-PA	AAEL012825-PA	AAEL012825-PA	AAEL012825-PA	AAEL012825-PA	AAEL012825-PA	bifunctional purine biosynthesis protein protein_coding supercont1.745:463342-465242:1 gene:AAEL012825	64680.7	8
24254	960.463	37.09	36.95	50.136								1394						8	ADNWWLR		PEP_FRAG_1	460	466	b3b7°y3y6y6*y7	6	6.3131	6.3131	0.0035	1	2	960.463	1394	1.7	2	0.3077	37.0949	36.7988	37.0289	37.153	37.383	AAEL012825-PA	AAEL012825-PA	AAEL012825-PA	AAEL012825-PA	AAEL012825-PA	AAEL012825-PA	bifunctional purine biosynthesis protein protein_coding supercont1.745:463342-465242:1 gene:AAEL012825	64680.7	8
24272	960.478	48	47.98	136.383	4183	3303	4840	5829	5988	7791	3566	3803	4140	3496	2508		6303	2	LFSTMFSK		PEP_FRAG_1	274	281	y4°y6°y7y8	4	4.9189	4.9189	0.0043	2	2	960.48	2632	1.24	1	0.2413	47.8765	47.6881	47.8497	47.9369	48.0985	AAEL003694-PA	AAEL003694-PA	AAEL003694-PA	AAEL003694-PA	AAEL003694-PA	AAEL003694-PA	hypothetical protein protein_coding supercont1.94:2220548-2223088:-1 gene:AAEL003694	98376.6	4.83
24284	960.537	46.21	46.23	50.384	9951	13392	9329	12380			4136	5368			1563	1186	1241	2	LDIEVLMK		PEP_FRAG_1	645	652	b2b3b4b5b6y2y3y4y5y6y7y8	12	8.5307	8.5307	0	7	7	960.538	13441	1.68	2	0.2611	46.1271	45.9424	46.0872	46.1652	46.3099	AAEL012778-PA,AAEL012778-PB	AAEL012778-PA,AAEL012778-PB	AAEL012778-PB	AAEL012778-PB	AAEL012778-PB	AAEL012778-PB	protease m1 zinc metalloprotease protein_coding supercont1.739:294698-297654:-1 gene:AAEL012778	102210	4.95
24297	961.473	22.75	22.74	52.511	2759													1	LFNNYYK		PEP_FRAG_2	39	45	b5y6y6*	3	6.2686	6.2686	0.0035	1	2	961.473	2759	1.83	2	0.2892	22.7489	22.5504	22.7134	22.8013	22.9642	AAEL001964-PA,AAEL001969-PA	AAEL001964-PA,AAEL001969-PA	AAEL001964-PA	AAEL001964-PA	AAEL001964-PA	AAEL001964-PA	protein serine/threonine kinase, putative protein_coding supercont1.47:2447955-2448335:1 gene:AAEL001964	14777.8	8.57
24326	961.521	33.44	33.45	136.904					2844	2634					2339	4001	4760	13	LLDSLSGEK		PEP_FRAG_1	579	587	b4b7°b8y3y4y5y6y6°y7y9	10	7.2848	7.2848	0	3	3	961.519	6200	1.14	1	0.2769	33.4027	33.2332	33.3657	33.4371	33.5695	AAEL005733-PA	AAEL005733-PA	AAEL005733-PA	AAEL005733-PA	AAEL005733-PA	AAEL005733-PA	myosin heavy chain, nonmuscle or smooth muscle protein_coding supercont1.172:1163891-1178142:1 gene:AAEL005733	187875	5.42
24352	962.46	30.26	30.3	51.2183							1121				5005	2252	2714	12	FAFDYATK		PEP_FRAG_1	189	196	b4°y6y7	3	5.7031	5.7031	0.0038	2	2	962.46	2096	2	2	0.254	30.3451	30.1351	30.2972	30.3846	30.5466	AAEL010143-PA	AAEL010143-PA	AAEL010143-PA	AAEL010143-PA	AAEL010143-PA	AAEL010143-PA	isocitrate dehydrogenase protein_coding supercont1.456:172556-183323:-1 gene:AAEL010143	40963.1	8.74
24364	962.489	22.56	22.6	51.2116	2273	2493	2019	2088			1062	1018			3788	1408	1523	3	LYDPEIGR		PEP_FRAG_1	970	977	b2y2y4y5y6	5	6.3136	6.3136	0.0035	6	7	962.487	1663	2	2	0.3209	22.5909	22.3279	22.5365	22.649	22.8576	AAEL003655-PA	AAEL003655-PA	AAEL003655-PA	AAEL003655-PA	AAEL003655-PA	AAEL003655-PA	conserved hypothetical protein protein_coding supercont1.94:2210612-2215851:-1 gene:AAEL003655	186327	5.82
24368	962.471	48.59	48.59	138.265	1804	1496					1273	967						1	QMLESMIK	Pyrrolidone carboxylic acid N-TERM(1)	VAR_MOD	317	324	b3b4b5b5°b6°b8y8	7	5.8188	5.8188	0.0038	2	2	962.47	1513	1	1	0.2911	48.621	48.3636	48.5664	48.6757	48.8785	AAEL012576-PA	AAEL012576-PA	AAEL012576-PA	AAEL012576-PA	AAEL012576-PA	AAEL012576-PA	pyruvate kinase protein_coding supercont1.713:261689-291914:1 gene:AAEL012576	56788.3	7.48
24400	962.561	34.62	34.61	52.7576			3490	3218	4862	5158	1401	1303		2380	8357	4827	4304	3	YEGIILVR		PEP_FRAG_1	112	119	b2b3y3y4y5y6y7	7	6.8858	6.8858	0.0005	9	10	962.561	2893	2	2	0.2074	34.6337	34.4401	34.5918	34.6736	34.8252	AAEL015458-PA,AAEL015639-PA	AAEL015458-PA,AAEL015639-PA
24444	963.522	37.77	37.76	53.4282	1182						1364					2826	2458	13	YNLGLDLR		PEP_FRAG_1	399	406	b2b2*b6*b7°y2y3y5y6y7y8y8*	11	7.7852	7.7852	0	2	2	963.521	2424	1.84	2	0.2966	37.7144	37.5067	37.6692	37.7569	37.9194	AAEL010464-PC	AAEL010464-PC	AAEL010464-PC	AAEL010464-PC	AAEL010464-PC	AAEL010464-PC	glutamate dehydrogenase protein_coding supercont1.479:643188-688355:1 gene:AAEL010464	46979.4	6.45
24448	963.556	12.38	12.44	54.8132	3802	3850	2224	1641			3811	3798						3	RVIDYAVK		PEP_FRAG_1	10	17	b4b5b6b7y1y2y6°y8	8	5.899	5.899	0.0038	4	4	963.554	1869	2	2	0.3227	12.3299	12.1375	12.2903	12.3726	12.5254	AAEL005056-PA	AAEL005056-PA	AAEL005056-PA	AAEL005056-PA	AAEL005056-PA	AAEL005056-PA	electron transfer flavoprotein beta-subunit protein_coding supercont1.140:1408923-1411240:1 gene:AAEL005056	22920.7	9.39
24449	963.555	22.29	22.32	54.1557						5543	2121	1974			5871	7513	7249	12	RFALELSK		MISSING_CLEAVAGE	74	81	b5b6y1y2y3y7y7°y8	8	7.1551	7.1551	0	4	5	963.557	9054	2	2	0.2123	22.3789	22.1837	22.3373	22.4201	22.5737	AAEL010464-PC	AAEL010464-PC	AAEL010464-PC	AAEL010464-PC	AAEL010464-PC	AAEL010464-PC	glutamate dehydrogenase protein_coding supercont1.479:643188-688355:1 gene:AAEL010464	46979.4	6.45
24450	963.582	14.23	14.27	54.1152	2438	2375	3491	2864			1814							3	KILAYVEK		MISSING_CLEAVAGE	459	466	b1y5y6	3	6.2607	6.2607	0.0035	2	2	963.582	2923	2	2	0.2274	14.2443	14.008	14.1871	14.2836	14.4627	AAEL009658-PA,AAEL009658-PC,AAEL009658-PB	AAEL009658-PA,AAEL009658-PC,AAEL009658-PB	AAEL009658-PB	AAEL009658-PB	AAEL009658-PB	AAEL009658-PB	alpha,alpha-trehalase protein_coding supercont1.416:220712-250040:-1 gene:AAEL009658	67353.2	4.99
24520	964.432	14.07	14.1	53.8679	10222	9366	2653	2031	12733	12309	8744	7812			4919	5466	5196	2	HMECIFK	Carbamidomethyl C(4)	PEP_FRAG_1	216	222	b2b3b3°b4b5b6y1y2y5y6y7	11	7.8981	7.8981	0	11	11	964.432	10613	2	2	0.3269	14.0588	13.8267	14.0106	14.1097	14.2935	AAEL006417-PA	AAEL006417-PA	AAEL006417-PA	AAEL006417-PA	AAEL006417-PA	AAEL006417-PA	D7 protein, putative protein_coding supercont1.204:322860-324089:1 gene:AAEL006417	39198.1	9.55
24524	964.514	52.97	52.97	132.303							1223							7	EEFTALVR		PEP_FRAG_2	196	203	b4b5°	2	5.0798	5.5798	0.0038	1	2	964.514	1223	1	1	0.25	52.9733	52.7847	52.9334	53.0135	53.1622	AAEL001965-PA	AAEL001965-PA	AAEL001965-PA	AAEL001965-PA	AAEL001965-PA	AAEL001965-PA	imaginal disc growth factor protein_coding supercont1.47:1656143-1676067:-1 gene:AAEL001965	48940.6	6.13
24551	965.502	24.1	24.16	51.912	1485	1539	2513	2234										2	NEYTIGLR		PEP_FRAG_1	571	578	b4°b8*y1y3y4y5y6y8	8	6.5562	6.5562	0.0023	3	3	965.502	1303	1.81	2	0.2681	23.9661	23.7304	23.915	24.0145	24.1991	AAEL010014-PA	AAEL010014-PA	AAEL010014-PA	AAEL010014-PA	AAEL010014-PA	AAEL010014-PA	hypothetical protein protein_coding supercont1.446:955328-963629:-1 gene:AAEL010014	235001	4.44
24557	965.482	35.6	35.62	51.8838					11015	10947					39022	16667	15108	11	GIVDCFVR	Carbamidomethyl C(5)	PEP_FRAG_2	56	63	b2b3b5°y2y3y4y5y6	8	8.3259	8.3259	0	5	5	965.476	51946	1.93	2	0.2539	35.4545	35.2441	35.4091	35.498	35.663	AAEL004855-PA	AAEL004855-PA	AAEL004855-PA	AAEL004855-PA	AAEL004855-PA	AAEL004855-PA	ADP,ATP carrier protein protein_coding supercont1.132:1668937-1682495:1 gene:AAEL004855	33237.4	9.96
24583	966.398	39.79	39.79	47.128							1041							7	GEYPLECV	Carbamidomethyl C(7)	PEP_FRAG_2	366	373	b4y6y8	3	5.0442	6.0254	0.0038	1	2	966.398	1041	2	2	0.1985	39.7941	39.5966	39.753	39.8373	39.9936	AAEL014913-PA	AAEL014913-PA	AAEL014913-PA	AAEL014913-PA	AAEL014913-PA	AAEL014913-PA	pyruvate kinase protein_coding supercont1.1334:9859-21417:1 gene:AAEL014913	58084.7	7.13
24648	967.495	24.02	24.26	52.205											2879			11	TVVMGASFR		PEP_FRAG_1	233	241	b3b5°y4y5y6	5	5.6726	5.6726	0.0038	1	2	967.495	2879	2	2	0.2287	24.0229	23.7868	23.9669	24.064	24.2441	AAEL009389-PA	AAEL009389-PA	AAEL009389-PA	AAEL009389-PA	AAEL009389-PA	AAEL009389-PA	transaldolase protein_coding supercont1.394:869982-880284:1 gene:AAEL009389	37276.9	6.16
24652	967.44	25.68	25.7	48.7352	4738	4833	4360	4264			3695	3978						3	FCVGGNWK	Carbamidomethyl C(2)	PEP_FRAG_1	5	12	b2y1y5y5*y6y7	6	6.7965	6.7965	0.0005	2	2	967.44	3798	2	2	0.275	25.7172	25.5365	25.6785	25.755	25.897	AAEL002542-PA	AAEL002542-PA	AAEL002542-PA	AAEL002542-PA	AAEL002542-PA	AAEL002542-PA	triosephosphate isomerase protein_coding supercont1.60:534041-534939:1 gene:AAEL002542	26721.3	5.94
24658	967.502	37.37	37.39	138.898													1254	13	TVVMGASFR		PEP_FRAG_1	233	241	y5°y6°	2	5.2659	5.6726	0.0038	1	2	967.502	1254	1.3	1	0.3155	37.3671	37.1395	37.3191	37.4159	37.5955	AAEL009389-PA	AAEL009389-PA	AAEL009389-PA	AAEL009389-PA	AAEL009389-PA	AAEL009389-PA	transaldolase protein_coding supercont1.394:869982-880284:1 gene:AAEL009389	37276.9	6.16
24682	967.549	22.13	22.23	51.1813											3297	1086	1146	13	GGPPGLATGLK		PEP_FRAG_1	16	26	y7°y8y9	3	6.2923	6.2923	0.0035	3	3	967.548	1149	2	2	0.2088	22.1438	21.9411	22.1056	22.1943	22.3587	AAEL012282-PC,AAEL013952-PA,AAEL012282-PA,AAEL012282-PB	AAEL012282-PC,AAEL013952-PA,AAEL012282-PA,AAEL012282-PB	AAEL012282-PA	AAEL012282-PA	AAEL012282-PA	AAEL012282-PA	prohibitin protein_coding supercont1.675:317798-327157:-1 gene:AAEL012282	33047.1	10
24701	968.444	28.49	28.55	51.0017											7923	1791	2108	13	DWSANFTK		PEP_FRAG_1	237	244	y4*y5y6y7°y8	5	7.4042	7.4042	0	3	4	968.443	2126	1.67	2	0.2171	28.5268	28.3409	28.4909	28.5718	28.7218	AAEL002956-PA,AAEL011789-PA,AAEL011789-PB	AAEL002956-PA,AAEL011789-PA,AAEL011789-PB	AAEL002956-PA	AAEL002956-PA	AAEL002956-PA	AAEL002956-PA	Probable citrate synthase 1, mitochondrial Precursor (EC 2.3.3.1) protein_coding supercont1.73:53696-90638:-1 gene:AAEL002956	51884.8	9.07
24719	968.471	29.48	29.5	52.211	4499	5089	3511	3406	1687		5173	4542			2065			4	MLYDLADK		PEP_FRAG_1	232	239	b4y2y4y5y6y7y8	7	6.4517	6.4517	0.0029	6	6	968.473	2574	1.78	2	0.3338	29.4398	29.2185	29.3886	29.4804	29.6506	AAEL013739-PA	AAEL013739-PA	AAEL013739-PA	AAEL013739-PA	AAEL013739-PA	AAEL013739-PA	electron transport oxidoreductase protein_coding supercont1.906:209148-227622:-1 gene:AAEL013739	34461.5	8.88
24725	968.51	51.04	50.98	137.222	1360						1059	990						7	LGEFLFDK		PEP_FRAG_1	198	205	b4y3°y4°y7	4	5.4748	7.3535	0	1	6	968.509	1239	1	1	0.2303	50.9972	50.7644	50.9458	51.0436	51.225	AAEL007385-PA,AAEL007385-PB	AAEL007385-PA,AAEL007385-PB	AAEL007385-PA	AAEL007385-PA	AAEL007385-PA	AAEL007385-PA	Ferritin subunit Precursor (EC 1.16.3.1)(Ferritin heavy chain-like protein)(AeFer(H)) protein_coding supercont1.252:573121-581576:1 gene:AAEL007385	23762	5.57
24726	968.502	43.64	43.64	51.051	7240	7496	6621	6977			9371	8380						8	LGEFLFDK		PEP_FRAG_1	198	205	b2b3°b5y2y3y4y5y6y7y8	10	7.3535	7.3535	0	5	6	968.502	13954	1.91	2	0.3613	43.7624	43.5716	43.7233	43.8051	43.9568	AAEL007385-PA,AAEL007385-PB	AAEL007385-PA,AAEL007385-PB	AAEL007385-PA	AAEL007385-PA	AAEL007385-PA	AAEL007385-PA	Ferritin subunit Precursor (EC 1.16.3.1)(Ferritin heavy chain-like protein)(AeFer(H)) protein_coding supercont1.252:573121-581576:1 gene:AAEL007385	23762	5.57
24729	968.572	19.28	19.35	50.164											3992	1428	1609	13	TTILPQPAK		PEP_FRAG_1	516	524	b1b9°y3y5y7y8	6	6.9359	6.9359	0	3	3	968.57	1605	2	2	0.2821	19.2622	19.0076	19.2163	19.3288	19.5376	AAEL009872-PA	AAEL009872-PA	AAEL009872-PA	AAEL009872-PA	AAEL009872-PA	AAEL009872-PA	alanine aminotransferase protein_coding supercont1.435:409834-445789:1 gene:AAEL009872	60490.7	8.23
24730	968.537	36.46	36.46	51.9692	3380	3060			2348	2422	3129	3195				1178	1330	6	FPLYLSTK		PEP_FRAG_1	204	211	b7°y5y6y7y8	5	5.9649	5.9649	0.0038	4	4	968.538	1440	2	2	0.3313	36.3657	36.0267	36.2876	36.4283	36.6893	AAEL000746-PA	AAEL000746-PA	AAEL000746-PA	AAEL000746-PA	AAEL000746-PA	AAEL000746-PA	NADP-specific isocitrate dehydrogenase protein_coding supercont1.15:4012358-4013587:-1 gene:AAEL000746	46294	6.4
24731	968.571	17.75	17.74	55.6593	1211	1430	4050	3790			1933	2297	2711					3	LQEAPVIAK		PEP_FRAG_1	67	75	b4°y5y7y7°y8y8°	6	5.8778	5.8778	0.0038	5	5	968.572	3502	2	2	0.1725	17.7197	17.5638	17.6867	17.7529	17.8758	AAEL003313-PA	AAEL003313-PA	AAEL003313-PA	AAEL003313-PA	AAEL003313-PA	AAEL003313-PA	alkaline phosphatase protein_coding supercont1.83:1261500-1280645:1 gene:AAEL003313	61215.5	5.37
24753	968.586	28.68	28.71	52.3615	5068	5439	4358	4086	3843	2586	3518	3496			3335	2180	2306	7	LLPFITHK		PEP_FRAG_1	164	171	b2y3y5y6	4	7.1296	7.1296	0	9	10	968.586	4759	2	2	0.2269	28.69	28.4713	28.6402	28.7312	28.9	AAEL004930-PA	AAEL004930-PA	AAEL004930-PA	AAEL004930-PA	AAEL004930-PA	AAEL004930-PA	carbonic anhydrase protein_coding supercont1.135:950648-1003191:-1 gene:AAEL004930	31649.4	5.69
24760	969.456	30.55	30.56	51.511	2356	2669	3000	2576			4261	4338						7	FPFMANSR		PEP_FRAG_1	420	427	b2y4y5y6y7	5	6.4304	6.4304	0.0029	5	5	969.456	6142	2	2	0.2662	30.5694	30.3077	30.5157	30.6279	30.8359	AAEL006928-PA	AAEL006928-PA	AAEL006928-PA	AAEL006928-PA	AAEL006928-PA	AAEL006928-PA	dihydrolipoamide dehydrogenase protein_coding supercont1.228:1325172-1348931:-1 gene:AAEL006928	54172.8	6.37
24775	969.5	7.05	7.37	52.6457											2550	2941	3106	13	AKSEIMYK		MISSING_CLEAVAGE	248	255	b6y1y2y3y5y6y6°y8	8	7.4836	7.4836	0	2	2	969.502	3328	2	2	0.1606	7.0342	6.8751	7.0003	7.0677	7.1929	AAEL004855-PA	AAEL004855-PA	AAEL004855-PA	AAEL004855-PA	AAEL004855-PA	AAEL004855-PA	ADP,ATP carrier protein protein_coding supercont1.132:1668937-1682495:1 gene:AAEL004855	33237.4	9.96
24790	969.542	16.53	16.57	49.4177											8263	2193	2541	13	GGGQIIPTAR		PEP_FRAG_1	703	712	b4b5*b6y4y5y6y9°y10	8	7.3805	7.3805	0	2	3	969.541	2547	2	2	0.2841	16.4974	16.275	16.4514	16.5466	16.723	AAEL004500-PB,AAEL004500-PA	AAEL004500-PB,AAEL004500-PA	AAEL004500-PA	AAEL004500-PA	AAEL004500-PA	AAEL004500-PA	eukaryotic translation elongation factor protein_coding supercont1.121:1852844-1861602:-1 gene:AAEL004500	95362.5	5.95
24848	970.494	17.85	17.88	51.1012	6723	7444	3706	3226			3699	3920			2371	1446	1419	7	YVQELYR		PEP_FRAG_1	6	12	b2b4y2y3y4y5y5*y6y7	9	7.102	7.102	0	4	4	970.493	4880	1.91	2	0.3146	17.8782	17.5681	17.8158	17.9494	18.1972	AAEL012736-PC,AAEL012736-PD,AAEL012736-PA,AAEL012736-PE,AAEL012736-PB,AAEL001488-PA	AAEL012736-PC,AAEL012736-PD,AAEL012736-PA,AAEL012736-PE,AAEL012736-PB,AAEL001488-PA	AAEL012736-PA	AAEL012736-PA	AAEL012736-PA	AAEL012736-PA	ribosomal protein L15 protein_coding supercont1.733:257900-258696:1 gene:AAEL012736	18662.6	11.25
24880	971.421	42.08	42.08	132.703							1161							7	GTEQGMTFT		PEP_FRAG_2	308	316	b5°b9°y3y5°y6*y9*	6	5.3676	5.3676	0.0041	1	3	971.421	1161	1.26	1	0.4564	42.0783	41.8435	42.0312	42.1324	42.3201	AAEL010590-PA	AAEL010590-PA	AAEL010590-PA	AAEL010590-PA	AAEL010590-PA	AAEL010590-PA	aldose-1-epimerase protein_coding supercont1.488:112025-128922:-1 gene:AAEL010590	47655	5.74
24882	971.436	32.98	33.01	51.616	1675	2364	3575	3652			2198	2254			4220			3	GFADFCVR	Carbamidomethyl C(6)	PEP_FRAG_1	30	37	b8°y1y3y4y5y6y8	7	6.7868	6.7868	0.0005	6	6	971.438	2959	1.75	2	0.2158	33.0453	32.83	33	33.0917	33.2617	AAEL005524-PA	AAEL005524-PA	AAEL005524-PA	AAEL005524-PA	AAEL005524-PA	AAEL005524-PA	adenosylhomocysteinase protein_coding supercont1.161:675483-698131:1 gene:AAEL005524	52049.6	6.28
24884	971.426	43.45	43.43	130.382			1370											3	GTEQGMTFT		PEP_FRAG_2	308	316	b6*b9°y7y8°	4	4.5705	5.3676	0.0041	1	3	971.426	1370	1.29	1	0.4092	43.4452	43.0875	43.3801	43.5378	43.8304	AAEL010590-PA	AAEL010590-PA	AAEL010590-PA	AAEL010590-PA	AAEL010590-PA	AAEL010590-PA	aldose-1-epimerase protein_coding supercont1.488:112025-128922:-1 gene:AAEL010590	47655	5.74
24889	971.426	41.7	41.7	130.932	4612	4557	11101	11843			4504	4515						1	GTEQGMTFT		PEP_FRAG_2	308	316	b4y5°y9	3	5.1737	5.3676	0.0041	1	3	971.425	4222	1.1	1	0.2523	41.7357	41.5507	41.6955	41.7736	41.9184	AAEL010590-PA	AAEL010590-PA	AAEL010590-PA	AAEL010590-PA	AAEL010590-PA	AAEL010590-PA	aldose-1-epimerase protein_coding supercont1.488:112025-128922:-1 gene:AAEL010590	47655	5.74
24898	971.509	15.56	15.57	53.272	3099	3064	2500	2647			3689	3577						8	SPAEAEVLR		PEP_FRAG_1	189	197	b2b3y4y5y6y7y8	7	6.1395	6.1395	0.0036	4	4	971.511	4387	2	2	0.2218	15.6442	15.4249	15.5997	15.6939	15.8686	AAEL008893-PA	AAEL008893-PA	AAEL008893-PA	AAEL008893-PA	AAEL008893-PA	AAEL008893-PA	xaa-pro dipeptidase pepd/pepq(e.coli) protein_coding supercont1.355:471442-602531:1 gene:AAEL008893	54021.5	5.25
24963	972.52	8.33	8.33	53.853							2005							7	MVLDRNPK		MISSING_CLEAVAGE	312	319	b6b7°y4y6y6°y7y8	7	6.618	6.618	0.002	1	2	972.52	2005	2	2	0.2072	8.3276	8.1412	8.2871	8.3658	8.5118	AAEL013407-PB	AAEL013407-PB	AAEL013407-PB	AAEL013407-PB	AAEL013407-PB	AAEL013407-PB	catalase protein_coding supercont1.839:151306-179685:-1 gene:AAEL013407	57182.4	7.33
24964	972.521	8.28	8.32	53.949								2067						8	MVLDRNPK		MISSING_CLEAVAGE	312	319	y5y6y7	3	6.5912	6.618	0.002	1	2	972.521	2067	2	2	0.199	8.2827	8.085	8.2417	8.3263	8.483	AAEL013407-PB	AAEL013407-PB	AAEL013407-PB	AAEL013407-PB	AAEL013407-PB	AAEL013407-PB	catalase protein_coding supercont1.839:151306-179685:-1 gene:AAEL013407	57182.4	7.33
24968	972.521	8.8	8.96	53.7648	3359	3918	1264				3212	3163						8	HTAQQLFK		PEP_FRAG_1	173	180	b6b6°b7y2y6y7	6	6.1394	6.1394	0.0036	4	4	972.522	3501	2	2	0.2587	8.9518	8.7358	8.9094	9.0029	9.1764	AAEL005722-PA	AAEL005722-PA	AAEL005722-PA	AAEL005722-PA	AAEL005722-PA	AAEL005722-PA	60S ribosomal protein L7a protein_coding supercont1.171:194630-198912:1 gene:AAEL005722	39518.7	10.67
24974	972.462	28.36	28.36	53.9285	6919	6926	3773	3578	4339	4805	4203	4037						1	YDTLDFAK		PEP_FRAG_1	648	655	b2b3y2y3y4y5y6y6°y7y8	10	6.4769	6.4769	0.0029	1	2	972.461	7304	1.89	2	0.2229	28.3747	28.2128	28.3413	28.4106	28.5391	AAEL014292-PA,AAEL014903-PA,RANDOM22853	AAEL014292-PA,AAEL014903-PA,RANDOM22853	AAEL014292-PA	AAEL014292-PA	AAEL014292-PA	AAEL014292-PA	40S ribosomal protein S24 protein_coding supercont1.1059:149190-149582:-1 gene:AAEL014292	15178.1	11.57
25010	972.577	27.05	27.09	52.9428					2519	2583					5434	2185	2379	5	ISLAAGAITR		PEP_FRAG_1	409	418	b2y1y5y6y7y8y8°y9	8	6.5586	6.5586	0.0023	5	5	972.576	1512	2	2	0.2669	27.2201	27.0366	27.1807	27.2583	27.4024	AAEL006333-PA	AAEL006333-PA	AAEL006333-PA	AAEL006333-PA	AAEL006333-PA	AAEL006333-PA	salivary apyrase, putative protein_coding supercont1.201:221091-222943:1 gene:AAEL006333	63923.2	8.39
25024	973.414	33.82	33.82	123.724							1134							7	GGDGFDMFK		PEP_FRAG_2	510	518	y5y6°y7y7°y9	5	4.7008	5.8897	0.0038	1	2	973.414	1134	1	1	0.2572	33.818	33.5649	33.7675	33.8767	34.0794	AAEL006333-PA	AAEL006333-PA	AAEL006333-PA	AAEL006333-PA	AAEL006333-PA	AAEL006333-PA	salivary apyrase, putative protein_coding supercont1.201:221091-222943:1 gene:AAEL006333	63923.2	8.39
25028	973.438	19.15	19.33	50.825											1150			11	YYAGWADK		PEP_FRAG_1	147	154	y2y3y6y7	4	6.1683	6.1683	0.0035	1	2	973.438	1150	2	2	0.349	19.1537	18.9257	19.1036	19.1995	19.3774	AAEL009029-PA	AAEL009029-PA	AAEL009029-PA	AAEL009029-PA	AAEL009029-PA	AAEL009029-PA	aldehyde dehydrogenase protein_coding supercont1.363:720309-733088:-1 gene:AAEL009029	56846	8.15
25033	973.447	6.35	6.59	52.0353	3012	3379	1421											1	CPLADNQR	Carbamidomethyl C(1)	PEP_FRAG_1	101	108	b3y3y4y5y6y7y8	7	7.7185	7.7185	0	3	4	973.446	3408	2	2	0.2016	6.3839	6.2233	6.3517	6.421	6.5494	AAEL009760-PA	AAEL009760-PA	AAEL009760-PA	AAEL009760-PA	AAEL009760-PA	AAEL009760-PA	Niemann-Pick Type C-2, putative protein_coding supercont1.426:745591-763924:1 gene:AAEL009760	16504.1	8.55
25036	973.456	53.87	53.79	50.192								1817						8	DAGLPSEWV		PEP_FRAG_1	1235	1243	b2y3y4°	3	4.6884	5.9161	0.0038	1	3	973.456	1817	1.75	2	0.2865	53.8727	53.662	53.832	53.9237	54.0936	AAEL010382-PA	AAEL010382-PA	AAEL010382-PA	AAEL010382-PA	AAEL010382-PA	AAEL010382-PA	aldehyde oxidase protein_coding supercont1.474:711598-736467:-1 gene:AAEL010382	141131	6.26
25037	973.454	53.78	53.78	50.11							1805							7	DAGLPSEWV		PEP_FRAG_2	1235	1243	b3b8°y1y9	4	5.0806	5.9161	0.0038	1	3	973.454	1805	1.73	2	0.3653	53.7786	53.5565	53.7366	53.8338	54.0139	AAEL010382-PA	AAEL010382-PA	AAEL010382-PA	AAEL010382-PA	AAEL010382-PA	AAEL010382-PA	aldehyde oxidase protein_coding supercont1.474:711598-736467:-1 gene:AAEL010382	141131	6.26
25038	973.457	18.67	18.71	50.6484					18069	17296					24645	17251	15581	13	TEGSSAFFK		PEP_FRAG_1	267	275	b2b3b3°b6°b7°b9°y2y3y4y5y6y7y7°y8y8°y9	16	8.5023	8.5023	0	5	6	973.457	27458	1.92	2	0.2752	18.6302	18.4195	18.5861	18.676	18.8427	AAEL004855-PA	AAEL004855-PA	AAEL004855-PA	AAEL004855-PA	AAEL004855-PA	AAEL004855-PA	ADP,ATP carrier protein protein_coding supercont1.132:1668937-1682495:1 gene:AAEL004855	33237.4	9.96
25052	973.462	42.01	41.99	138.232	14688	14124	11472	11415	12051	10886	17523	18066	4721	4396	3544	6365	6371	2	DAGLPSEWV		PEP_FRAG_1	1235	1243	b7°b8°b9b9°y9	5	5.9161	5.9161	0.0038	1	3	973.462	14402	1.09	1	0.3692	41.8846	41.7026	41.8453	41.9222	42.0648	AAEL010382-PA	AAEL010382-PA	AAEL010382-PA	AAEL010382-PA	AAEL010382-PA	AAEL010382-PA	aldehyde oxidase protein_coding supercont1.474:711598-736467:-1 gene:AAEL010382	141131	6.26
25068	973.54	40.32	40.28	52.9246			4006	4051	5136	4966	3466	3441	2504			2505	2883	5	YVIFYIR		PEP_FRAG_2	26	32	b5y5	2	5.9296	6.5315	0.0023	1	3	973.54	3045	2	2	0.3004	40.425	40.2169	40.3808	40.4692	40.6331	AAEL003957-PA,AAEL003957-PC,AAEL003957-PB	AAEL003957-PA,AAEL003957-PC,AAEL003957-PB	AAEL003957-PA	AAEL003957-PA	AAEL003957-PA	AAEL003957-PA	conserved hypothetical protein protein_coding supercont1.102:781024-820437:-1 gene:AAEL003957	17333.6	7.02
25072	973.549	54.16	54.14	136.91	2287	2517	1998	1976			2623	2405						8	YVIFYIR		PEP_FRAG_1	26	32	b5y6	2	6.5315	6.5315	0.0023	1	3	973.547	2766	1	1	0.2969	54.4138	54.1869	54.3628	54.4576	54.6335	AAEL003957-PA,AAEL003957-PB,AAEL003957-PC	AAEL003957-PA,AAEL003957-PB,AAEL003957-PC	AAEL003957-PA	AAEL003957-PA	AAEL003957-PA	AAEL003957-PA	conserved hypothetical protein protein_coding supercont1.102:781024-820437:-1 gene:AAEL003957	17333.6	7.02
25083	973.598	41.31	41.33	53.437							1336	1772			5346	1225	1469	8	ILIPNLYK		PEP_FRAG_1	265	272	y5y7	2	6.1264	6.1264	0.0038	3	3	973.6	2031	1.86	2	0.2362	41.4818	41.249	41.4348	41.535	41.7207	AAEL001588-PA	AAEL001588-PA	AAEL001588-PA	AAEL001588-PA	AAEL001588-PA	AAEL001588-PA	glutamate carboxypeptidase protein_coding supercont1.36:969743-982097:1 gene:AAEL001588	53723.2	5.2
25166	975.557	35.02	35.04	52.908					3100	2543					10908	5829	5369	13	FAEIVQLR		PEP_FRAG_1	53	60	b2b5°y3*y4y5y6y7y8	8	7.2123	7.2123	0	5	5	975.555	7323	1.94	2	0.2893	34.9842	34.8082	34.9477	35.023	35.1625	AAEL005798-PA	AAEL005798-PA	AAEL005798-PA	AAEL005798-PA	AAEL005798-PA	AAEL005798-PA	ATP synthase subunit beta vacuolar protein_coding supercont1.175:518603-524250:-1 gene:AAEL005798	55501.4	5.24
25169	975.545	28.95	28.94	53.9495	11059	10141	9412	9227	28096	27014	7481	7578	6050	5903	23294	22293	20878	13	LPLQDVYK		PEP_FRAG_1	248	255	b3b4b5b8y1y2y3y4y5y5*y5°y6y7y7*y8y8*	16	8.4169	8.4169	0	13	13	975.542	39562	1.98	2	0.2954	28.8932	28.6671	28.847	28.944	29.1239	AAEL017096-PA,AAEL017301-PA	AAEL017096-PA,AAEL017301-PA	AAEL017096-PA	AAEL017096-PA	AAEL017096-PA	AAEL017096-PA	hypothetical protein protein_coding supercont1.32:3146741-3148132:1 gene:AAEL017096	50815.3	9.44
25173	975.556	33.83	33.81	52.1614	3251	3165	4745	4787	17792	16831	4903	4647	7674	8024	28145	23446	21232	13	IGLFGGAGVGK		PEP_FRAG_1	178	188	b2b3b5y2y3y4y5y7y8y9y10y11	12	8.399	8.399	0	12	12	975.553	39799	1.97	2	0.2322	33.7335	33.5321	33.6923	33.7786	33.9388	AAEL002827-PA,AAEL003393-PA	AAEL002827-PA,AAEL003393-PA	AAEL002827-PA	AAEL002827-PA	AAEL002827-PA	AAEL002827-PA	ATP synthase beta subunit protein_coding supercont1.69:133469-149465:-1 gene:AAEL002827	53912	4.84
25211	976.444	11.74	11.82	52.4029	8295	8798	8187	8300	3560	3608	7529	7548	4506	4948	8967	4120	4504	13	AGFAGDDAPR		PEP_FRAG_1	20	29	b3b4y1y3y4y5y6y7y8y9	10	8.5221	8.5221	0	13	13	976.443	5827	2	2	0.2228	11.6783	11.5026	11.6446	11.7212	11.8632	AAEL005961-PA,AAEL009451-PA,AAEL011197-PA,AAEL011197-PB,AAEL001673-PA,AAEL001928-PA,AAEL004616-PA,AAEL004631-PA,AAEL005964-PA,AAEL001951-PA	AAEL005961-PA,AAEL009451-PA,AAEL011197-PA,AAEL011197-PB,AAEL001673-PA,AAEL001928-PA,AAEL004616-PA,AAEL004631-PA,AAEL005964-PA,AAEL001951-PA
25215	976.538	26.48	26.43	50.6995									3528	3404		1674	2112	10	FPLSVAGSAK		PEP_FRAG_2	116	125	y6y6°y8y9	4	5.2158	5.2158	0.0038	2	2	976.537	1435	2	2	0.2403	26.5544	26.3564	26.5197	26.6078	26.7711	AAEL013574-PA,AAEL013574-PB	AAEL013574-PA,AAEL013574-PB	AAEL013574-PA	AAEL013574-PA	AAEL013574-PA	AAEL013574-PA	apolipoprotein D, putative protein_coding supercont1.873:170319-292082:1 gene:AAEL013574	27262	8.25
25219	976.542	28.19	28.21	52.2728					11953	12404					26276	16119	14731	11	QIFLGGVDK		PEP_FRAG_1	100	108	b1b2b3*b8y5y6y7y8y9y9*	10	7.9324	7.9324	0	4	4	976.539	32973	1.97	2	0.2359	27.971	27.7855	27.9308	28.0092	28.1544	AAEL004855-PA	AAEL004855-PA	AAEL004855-PA	AAEL004855-PA	AAEL004855-PA	AAEL004855-PA	ADP,ATP carrier protein protein_coding supercont1.132:1668937-1682495:1 gene:AAEL004855	33237.4	9.96
25222	976.553	35.74	35.87	52.849											3464			11	NILGGTVFR		PEP_FRAG_1	135	143	b3y5y5°y7y7°	5	6.133	6.133	0.0036	1	2	976.553	3464	2	2	0.3834	35.7393	35.5704	35.7046	35.777	35.9112	AAEL000746-PA,AAEL012614-PA	AAEL000746-PA,AAEL012614-PA
25223	976.531	35.59	35.59	50.6697	3814	4441	4298	3373			2499	2283						1	LDIEVLMK	Oxidation M(7)	VAR_MOD	645	652	y1y3y4y5y5°y6y7	7	7.3885	7.3885	0	2	2	976.531	3377	2	2	0.2637	35.6431	35.4606	35.6081	35.6877	35.8352	AAEL012778-PA,AAEL012778-PB	AAEL012778-PA,AAEL012778-PB	AAEL012778-PB	AAEL012778-PB	AAEL012778-PB	AAEL012778-PB	protease m1 zinc metalloprotease protein_coding supercont1.739:294698-297654:-1 gene:AAEL012778	102210	4.95
25244	976.544	49.67	49.64	52.8131	12808	13765	4049	4192	3754	3426	9730	9781						7	FLNNIKDL		MISSING_CLEAVAGE	140	147	b3b7b8y1y2°y4°y6*y7y8	9	6.0855	6.0855	0.0036	3	3	976.544	17258	1.88	2	0.3086	49.6491	49.386	49.5942	49.7064	49.9145	AAEL009658-PB,AAEL009658-PC,AAEL009658-PA	AAEL009658-PB,AAEL009658-PC,AAEL009658-PA	AAEL009658-PB	AAEL009658-PB	AAEL009658-PB	AAEL009658-PB	alpha,alpha-trehalase protein_coding supercont1.416:220712-250040:-1 gene:AAEL009658	67353.2	4.99
25259	977.467	25.89	25.9	50.3648			10644	9971	4564	4177			9312	9451	6767	6411	6034	12	LGMDELSGR		PEP_FRAG_1	7	15	b2b4b9°y1y3y4y5y6y7y8	10	7.6792	7.6792	0	7	7	977.468	7453	2	2	0.3202	25.922	25.7463	25.8823	25.9557	26.0918	AAEL003550-PA	AAEL003550-PA	AAEL003550-PA	AAEL003550-PA	AAEL003550-PA	AAEL003550-PA	aquaporin protein_coding supercont1.89:2486622-2504794:1 gene:AAEL003550	28322.6	6.22
25260	977.501	16.1	16.11	51.5494							1918	2247			3043	1442	1271	8	AFAQDALNK		PEP_FRAG_1	826	834	b2b3b9°y2y6y7	6	6.2311	6.2311	0.0038	1	2	977.502	2449	2	2	0.3194	16.1828	15.9993	16.1488	16.2294	16.379	AAEL000293-PA	AAEL000293-PA	AAEL000293-PA	AAEL000293-PA	AAEL000293-PA	AAEL000293-PA	ebna2 binding protein P100 protein_coding supercont1.5:4654759-4691495:1 gene:AAEL000293	104005	7.06
25263	977.495	30.39	30.39	132.914							2348							7	AFAQDALNK		PEP_FRAG_2	826	834	b9*y7y8y9	4	5.5973	6.2311	0.0038	1	2	977.495	2348	1	1	0.2514	30.3909	30.2036	30.3488	30.4272	30.5724	AAEL000293-PA	AAEL000293-PA	AAEL000293-PA	AAEL000293-PA	AAEL000293-PA	AAEL000293-PA	ebna2 binding protein P100 protein_coding supercont1.5:4654759-4691495:1 gene:AAEL000293	104005	7.06
25280	977.523	35.19	35.19	51.7366	1396		2514	2025				907			1684			3	EVIGGFLDK		PEP_FRAG_1	899	907	b5b9y2y3°y5y6y9	7	7.1459	7.1459	0	3	4	977.525	2085	1.83	2	0.2934	35.2353	35.0097	35.1919	35.2902	35.4724	AAEL005821-PA,AAEL015247-PA	AAEL005821-PA,AAEL015247-PA	AAEL005821-PA	AAEL005821-PA	AAEL005821-PA	AAEL005821-PA	alanyl aminopeptidase protein_coding supercont1.175:1864852-1877095:1 gene:AAEL005821	107673	4.98
25281	977.468	36.95	36.92	50.2522	9624	10370	19108	18573	5516	5632	8713	9580	12631	13291	5772	3454	3575	3	TLDWWEK		PEP_FRAG_1	26	32	b2b3b3°b4b5°y2y2°y3y4y5y5°y6y7	13	8.1962	8.1962	0	11	11	977.468	23443	1.88	2	0.3302	36.9602	36.7518	36.9155	37.0037	37.1673	AAEL003434-PA	AAEL003434-PA	AAEL003434-PA	AAEL003434-PA	AAEL003434-PA	AAEL003434-PA	alpha-amylase protein_coding supercont1.86:770929-772866:-1 gene:AAEL003434	68698.6	5.13
25286	977.521	50.89	51.02	137.817											1229			11	EVIGGFLDK		PEP_FRAG_2	899	907	y4y5y9	3	4.1924	7.1459	0	1	4	977.521	1229	1.35	1	0.3659	50.8918	50.55	50.8382	50.9936	51.2818	AAEL005821-PA,AAEL015247-PA	AAEL005821-PA,AAEL015247-PA	AAEL005821-PA	AAEL005821-PA	AAEL005821-PA	AAEL005821-PA	alanyl aminopeptidase protein_coding supercont1.175:1864852-1877095:1 gene:AAEL005821	107673	4.98
25358	979.424	19.05	19.08	50.2198	2555	2291	2687	2575				1250						4	EQDRPGMF		PEP_FRAG_1	348	355	b6°b7°y1y5y6	5	6.6693	6.6693	0.0009	3	3	979.427	1900	2	2	0.221	18.9967	18.7762	18.9503	19.0441	19.2182	AAEL010661-PA	AAEL010661-PA	AAEL010661-PA	AAEL010661-PA	AAEL010661-PA	AAEL010661-PA	phospholipid scramblase 1, protein_coding supercont1.495:557014-585563:-1 gene:AAEL010661	38862.7	4.93
25368	979.515	16.04	15.94	52.342									1262					9	SPYVIGSTR		PEP_FRAG_1	666	674	b3b4°y5y6	4	5.0457	6.0467	0.0038	1	3	979.515	1262	2	2	0.207	16.044	15.838	16.0011	16.089	16.2521	AAEL011038-PA,AAEL013381-PA	AAEL011038-PA,AAEL013381-PA	AAEL013381-PA	AAEL013381-PA	AAEL013381-PA	AAEL013381-PA	integrin alpha-ps protein_coding supercont1.832:233192-252037:-1 gene:AAEL013381	124177	4.91
25369	979.482	39.96	39.97	138.117	1620	1364	2061	1761			2922	3118					1106	3	QMLESMIK		PEP_FRAG_2	317	324	b3b5*y5y8	4	5.6033	5.6033	0.0038	1	2	979.485	1696	1.19	1	0.3212	39.9876	39.7285	39.9329	40.043	40.2474	AAEL012576-PA	AAEL012576-PA	AAEL012576-PA	AAEL012576-PA	AAEL012576-PA	AAEL012576-PA	pyruvate kinase protein_coding supercont1.713:261689-291914:1 gene:AAEL012576	56788.3	7.48
25370	979.501	18.6	18.66	50.3925						1855					4140	2329	2343	12	LVETGFADK		PEP_FRAG_2	74	82	y3y6y7y7°y8	5	6.1772	6.1772	0.0035	3	3	979.5	2155	2	2	0.2082	18.6567	18.4587	18.6143	18.6982	18.8538	AAEL003872-PA	AAEL003872-PA	AAEL003872-PA	AAEL003872-PA	AAEL003872-PA	AAEL003872-PA	Translationally-controlled tumor protein homolog (TCTP) protein_coding supercont1.99:1134679-1146717:1 gene:AAEL003872	19716.3	4.46
25384	979.519	33.24	33.25	52.2327	4553	3583	3095	2695			4360	4496						1	WLIEYQK		PEP_FRAG_1	64	70	b1y1y2y3y5y6	6	6.338	6.338	0.0035	5	5	979.519	4280	2	2	0.3429	33.2866	33.0041	33.2225	33.3402	33.5587	AAEL011821-PB,AAEL013074-PA,AAEL011821-PA	AAEL011821-PB,AAEL013074-PA,AAEL011821-PA	AAEL011821-PB	AAEL011821-PB	AAEL011821-PB	AAEL011821-PB	adenylyl cyclase-associated protein protein_coding supercont1.617:112004-174963:-1 gene:AAEL011821	23175.5	7.9
25388	979.51	45.89	45.89	137.563							1437							7	QMLESMIK		PEP_FRAG_2	317	324	b4*y7°y8	3	5.4259	5.6033	0.0038	1	2	979.51	1437	1	1	0.2421	45.8893	45.6995	45.8497	45.9307	46.0809	AAEL012576-PA	AAEL012576-PA	AAEL012576-PA	AAEL012576-PA	AAEL012576-PA	AAEL012576-PA	pyruvate kinase protein_coding supercont1.713:261689-291914:1 gene:AAEL012576	56788.3	7.48
25426	980.491	24.92	24.93	50.1247	1437		2667	2432			884							3	YGFIPNGGR		PEP_FRAG_1	232	240	b2b3b4y5y6	5	6.9539	6.9539	0	4	5	980.49	2190	2	2	0.248	24.9385	24.7621	24.8999	24.9742	25.112	AAEL009658-PB,AAEL009658-PC,AAEL009658-PA	AAEL009658-PB,AAEL009658-PC,AAEL009658-PA	AAEL009658-PB	AAEL009658-PB	AAEL009658-PB	AAEL009658-PB	alpha,alpha-trehalase protein_coding supercont1.416:220712-250040:-1 gene:AAEL009658	67353.2	4.99
25427	980.492	25.97	25.99	51.5527	1651	1759					2289	1799						7	SLFMGGNVR		PEP_FRAG_1	120	128	b3b8°b9y1y5y6y7y9	8	6.4646	6.4646	0.0029	3	3	980.493	2671	1.77	2	0.2872	25.9863	25.7875	25.9431	26.0269	26.1825	AAEL003746-PA	AAEL003746-PA	AAEL003746-PA	AAEL003746-PA	AAEL003746-PA	AAEL003746-PA	4-Hydroxybutyrate CoA-transferase, putative protein_coding supercont1.96:1567134-1589407:-1 gene:AAEL003746	52134.6	8.1
25467	981.482	16.3	16.3	52.3598	3191	2904		1486			4059	3814						7	ETAEAYLGK		PEP_FRAG_1	155	163	b2°b3b3°y2y3y4y5y6	8	7.2899	7.2899	0	3	4	981.484	5459	1.79	2	0.219	16.3182	16.1383	16.2803	16.3568	16.4987	AAEL017349-PA,AAEL017973-PA,AAEL017975-PA,AAEL017976-PA,AAEL017977-PA,AAEL017979-PA,AAEL017980-PA,AAEL017974-PA,AAEL017981-PA	AAEL017349-PA,AAEL017973-PA,AAEL017975-PA,AAEL017976-PA,AAEL017977-PA,AAEL017979-PA,AAEL017980-PA,AAEL017974-PA,AAEL017981-PA
25487	981.538	40.38	40.39	52.7664					2547	2343					19285	5175	4751	13	ALSALMTFK		PEP_FRAG_1	33	41	b2b3°b4°b5b6y2y4y7y9	9	7.5889	7.5889	0	4	4	981.54	6129	1.64	2	0.3288	40.3211	40.1214	40.2799	40.3653	40.5238	AAEL010464-PC	AAEL010464-PC	AAEL010464-PC	AAEL010464-PC	AAEL010464-PC	AAEL010464-PC	glutamate dehydrogenase protein_coding supercont1.479:643188-688355:1 gene:AAEL010464	46979.4	6.45
25533	982.528	38.59	38.6	52.0003	3582	3478	6485											1	FLFSINNK		PEP_FRAG_1	568	575	b2b4°y3y3*y6	5	5.7695	5.7695	0.0038	1	2	982.527	3085	1.9	2	0.3187	38.6604	38.4267	38.5895	38.6772	38.84	AAEL015386-PA,AAEL015110-PA	AAEL015386-PA,AAEL015110-PA
25591	983.524	29.14	29.2	54.015											4504	1843	1832	11	IFTNLYGR		PEP_FRAG_1	66	73	b5y3y5y6y7	5	6.0072	6.0072	0.0038	2	2	983.525	3063	2	2	0.1966	28.9837	28.7811	28.9359	29.0194	29.1742	AAEL007681-PA	AAEL007681-PA	AAEL007681-PA	AAEL007681-PA	AAEL007681-PA	AAEL007681-PA	NADH-ubiquinone oxidoreductase flavoprotein 1 (ndufv1) protein_coding supercont1.274:702885-729928:1 gene:AAEL007681	54074.7	8.76
25596	983.607	42.53	42.52	54.19			5992											3	LTLLEGIPK		PEP_FRAG_1	419	427	b2b3°b7y5y6y7y7°y8	8	6.5408	6.5771	0.002	1	2	983.607	5992	2	2	0.2075	42.5269	42.3212	42.4846	42.5727	42.7362	AAEL009432-PA	AAEL009432-PA	AAEL009432-PA	AAEL009432-PA	AAEL009432-PA	AAEL009432-PA	Class B Scavenger Receptor (CD36 domain). protein_coding supercont1.395:454171-476093:-1 gene:AAEL009432	56008.7	4.64
25597	983.609	42.43	42.5	54.172				6436										4	LTLLEGIPK		PEP_FRAG_1	419	427	b2°b3°b6y2y5°y6y7y8y9	9	6.5771	6.5771	0.002	1	2	983.609	6436	1.95	2	0.2448	42.4267	42.229	42.3854	42.4696	42.626	AAEL009432-PA	AAEL009432-PA	AAEL009432-PA	AAEL009432-PA	AAEL009432-PA	AAEL009432-PA	Class B Scavenger Receptor (CD36 domain). protein_coding supercont1.395:454171-476093:-1 gene:AAEL009432	56008.7	4.64
25649	984.516	49.75	49.74	52.59	5060	5463	6084	5989	2636	3268	5170	5179	3434	2907	6350		2789	1	ILEFFGMK		PEP_FRAG_1	303	310	b2b3b4b7b7°y1y2y3y5y6y6°y7y8	13	7.6522	7.6522	0	11	11	984.517	4620	1.93	2	0.3188	49.7807	49.603	49.7455	49.8224	49.9649	AAEL000641-PA,AAEL000641-PB	AAEL000641-PA,AAEL000641-PB	AAEL000641-PA	AAEL000641-PA	AAEL000641-PA	AAEL000641-PA	protein disulfide isomerase protein_coding supercont1.13:668270-683719:-1 gene:AAEL000641	56295.7	4.76
25678	985.497	16.51	16.55	55.066											5498	1390	1273	11	EQTVFYAK		PEP_FRAG_1	121	128	b2b2°y3y4y7*y8	6	6.4949	6.4949	0.0023	1	2	985.496	4050	2	2	0.1916	16.5045	16.3214	16.465	16.5424	16.686	AAEL005435-PB,AAEL005435-PA	AAEL005435-PB,AAEL005435-PA	AAEL005435-PA	AAEL005435-PA	AAEL005435-PA	AAEL005435-PA	mitochondrial processing peptidase beta subunit protein_coding supercont1.156:1726989-1729306:1 gene:AAEL005435	52876.8	5.82
25683	985.515	27.28	27.26	54.354	1175		2061				2164	2156						3	EQTVFYAK		PEP_FRAG_2	121	128	b3°b4b8y3y6y8*	6	5.8111	6.4949	0.0023	1	2	985.515	1694	1.64	2	0.349	27.2443	27.0318	27.1781	27.257	27.4032	AAEL005435-PA,AAEL005435-PB	AAEL005435-PA,AAEL005435-PB	AAEL005435-PA	AAEL005435-PA	AAEL005435-PA	AAEL005435-PA	mitochondrial processing peptidase beta subunit protein_coding supercont1.156:1726989-1729306:1 gene:AAEL005435	52876.8	5.82
25685	985.495	41.3	41.29	147.143	5268	5806		1322	6652		6451	6541					1361	8	DYFAALTGK		PEP_FRAG_1	302	310	b3b4b5b6y1y2y3y4y5y5°y6y7y8y9	14	7.8277	7.8277	0	6	8	985.497	10283	1.31	1	0.2996	41.3816	41.2029	41.3443	41.4206	41.562	AAEL006417-PA	AAEL006417-PA	AAEL006417-PA	AAEL006417-PA	AAEL006417-PA	AAEL006417-PA	D7 protein, putative protein_coding supercont1.204:322860-324089:1 gene:AAEL006417	39198.1	9.55
25687	985.492	41.24	41.31	52.727						4652								6	DYFAALTGK		PEP_FRAG_1	302	310	b4b5b6b7y1y3y4y6y7y9	10	7.3918	7.8277	0	1	8	985.492	4652	1.53	2	0.278	41.2351	41.047	41.1977	41.2789	41.4296	AAEL006417-PA	AAEL006417-PA	AAEL006417-PA	AAEL006417-PA	AAEL006417-PA	AAEL006417-PA	D7 protein, putative protein_coding supercont1.204:322860-324089:1 gene:AAEL006417	39198.1	9.55
25688	985.496	41.17	41.29	52.898											4557			11	DYFAALTGK		PEP_FRAG_1	302	310	b2b3y4y5y6y7	6	6.8749	7.8277	0	1	8	985.496	4557	2	2	0.2031	41.1735	41.0098	41.1387	41.2082	41.3372	AAEL006417-PA	AAEL006417-PA	AAEL006417-PA	AAEL006417-PA	AAEL006417-PA	AAEL006417-PA	D7 protein, putative protein_coding supercont1.204:322860-324089:1 gene:AAEL006417	39198.1	9.55
25726	986.446	41.16	41.14	140.108			7080											3	ALDDFYDK		PEP_FRAG_1	457	464	b7y2y3y4°y8	5	6.4256	7.6293	0	1	9	986.446	7080	1.36	1	0.258	41.1552	40.9657	41.1156	41.1964	41.3463	AAEL008787-PA	AAEL008787-PA	AAEL008787-PA	AAEL008787-PA	AAEL008787-PA	AAEL008787-PA	V-type proton ATPase catalytic subunit A (V-ATPase subunit A)(EC 3.6.3.14)(Vacuolar proton pump subunit alpha)(V-ATPase 69 kDa subunit) protein_coding supercont1.349:699238-710948:1 gene:AAEL008787	68571.2	5.08
25739	986.443	27.56	27.56	51.409			2573	2679	2398	2287	972	1710			8842	3072	3189	13	ALDDFYDK		PEP_FRAG_1	457	464	y2y2°y4y5y6y6°y7y8	8	7.6293	7.6293	0	6	9	986.443	3416	1.79	2	0.365	27.5427	27.3682	27.506	27.5802	27.718	AAEL008787-PA	AAEL008787-PA	AAEL008787-PA	AAEL008787-PA	AAEL008787-PA	AAEL008787-PA	V-type proton ATPase catalytic subunit A (V-ATPase subunit A)(EC 3.6.3.14)(Vacuolar proton pump subunit alpha)(V-ATPase 69 kDa subunit) protein_coding supercont1.349:699238-710948:1 gene:AAEL008787	68571.2	5.08
25740	986.515	29.91	30.1	54.923											4777			11	SVYYDLVK		PEP_FRAG_1	216	223	y5y6y6°y7	4	6.4205	6.5929	0.002	1	2	986.515	4777	2	2	0.3421	29.9107	29.7371	29.8758	29.9507	30.0894	AAEL012950-PA	AAEL012950-PA	AAEL012950-PA	AAEL012950-PA	AAEL012950-PA	AAEL012950-PA	NADH-ubiquinone oxidoreductase 42 kda subunit protein_coding supercont1.766:105263-117395:1 gene:AAEL012950	47340.9	5.5
25741	986.516	30.07	30.11	54.367													1555	13	SVYYDLVK		PEP_FRAG_1	216	223	y2y5y6y8	4	6.5929	6.5929	0.002	1	2	986.516	1555	1.56	2	0.231	30.0745	29.9221	30.0376	30.0998	30.2153	AAEL012950-PA	AAEL012950-PA	AAEL012950-PA	AAEL012950-PA	AAEL012950-PA	AAEL012950-PA	NADH-ubiquinone oxidoreductase 42 kda subunit protein_coding supercont1.766:105263-117395:1 gene:AAEL012950	47340.9	5.5
25744	986.515	32.13	32.3	53.634											8182			11	EFSVYLTK		PEP_FRAG_1	396	403	b2°b4°b7°b8y1y2y3y4°y6y7	10	5.9638	6.7036	0.0009	1	2	986.515	8182	1.93	2	0.2798	32.1257	31.9499	32.0923	32.1691	32.3115	AAEL002399-PA	AAEL002399-PA	AAEL002399-PA	AAEL002399-PA	AAEL002399-PA	AAEL002399-PA	aspartate aminotransferase protein_coding supercont1.55:1678877-1701605:-1 gene:AAEL002399	47718.5	9.26
25745	986.511	32.31	32.36	134.35													3064	13	EFSVYLTK		PEP_FRAG_2	396	403	b8y4y5y6	4	6.7036	6.7036	0.0009	1	2	986.511	3064	1.45	1	0.3122	32.3075	31.9954	32.2413	32.3738	32.6197	AAEL002399-PA	AAEL002399-PA	AAEL002399-PA	AAEL002399-PA	AAEL002399-PA	AAEL002399-PA	aspartate aminotransferase protein_coding supercont1.55:1678877-1701605:-1 gene:AAEL002399	47718.5	9.26
25789	987.487	12	12.02	52.8112	1061	1143					1063	980						7	LLGCPDNAK	Carbamidomethyl C(4)	PEP_FRAG_1	374	382	y2y3y4y7y8	5	6.6478	6.6478	0.0009	2	2	987.488	1160	2	2	0.2299	12.0215	11.81	11.9777	12.0681	12.2358	AAEL005178-PA	AAEL005178-PA	AAEL005178-PA	AAEL005178-PA	AAEL005178-PA	AAEL005178-PA	hypothetical protein protein_coding supercont1.145:706023-707180:-1 gene:AAEL005178	43489.4	4.71
25810	987.442	36.62	36.61	50.3403	7458	7853	4310	4791			4212	2612						2	GGWWYYR		PEP_FRAG_1	237	243	b4y1y2y3y4y7	6	7.776	7.776	0	6	6	987.442	7358	1.61	2	0.2891	36.4656	36.1884	36.4119	36.5324	36.756	AAEL000726-PA	AAEL000726-PA	AAEL000726-PA	AAEL000726-PA	AAEL000726-PA	AAEL000726-PA	fibrinogen and fibronectin protein_coding supercont1.15:2838199-2839199:1 gene:AAEL000726	33918.2	5.99
25868	988.468	12.25	12.33	51.6513							1047					1801	2143	12	HGLEEEKF		MISSING_CLEAVAGE	164	171	b4b6y7y8	4	6.1067	6.1067	0.0036	1	2	988.468	1720	2	2	0.304	12.2601	12.0355	12.2134	12.3093	12.4872	AAEL003872-PA	AAEL003872-PA	AAEL003872-PA	AAEL003872-PA	AAEL003872-PA	AAEL003872-PA	Translationally-controlled tumor protein homolog (TCTP) protein_coding supercont1.99:1134679-1146717:1 gene:AAEL003872	19716.3	4.46
25869	988.501	11.27	11.42	51.3547	1290		2453	2332										3	INIESEQR		PEP_FRAG_1	545	552	b2y2y3y4y4*y5y5*y5°y6y7y7*	11	7.4848	7.4848	0	2	2	988.501	2066	2	2	0.2992	11.2719	11.0807	11.2345	11.3175	11.4713	AAEL000905-PA	AAEL000905-PA	AAEL000905-PA	AAEL000905-PA	AAEL000905-PA	AAEL000905-PA	hypothetical protein protein_coding supercont1.18:2993716-2995612:1 gene:AAEL000905	66240.6	6.09
25890	988.527	18.19	18.17	50.7983			1981	1844				2024						4	VESLQIGDK		PEP_FRAG_1	183	191	y3y5y7y8y8*	5	6.4509	6.4509	0.0029	2	2	988.526	1361	2	2	0.3429	18.0669	17.8294	18.0171	18.1183	18.306	AAEL011343-PA	AAEL011343-PA	AAEL011343-PA	AAEL011343-PA	AAEL011343-PA	AAEL011343-PA	conserved hypothetical protein protein_coding supercont1.570:52271-64072:-1 gene:AAEL011343	75825.6	4.59
25906	988.592	34.06	34.07	52.9542					3101	2705					8825	5032	4641	6	TSAVGLSLIK		PEP_FRAG_1	112	121	b2b3b3°y2y4y5y6y7y8y9	10	7.1984	7.1984	0	4	4	988.598	1607	2	2	0.2541	34.0101	33.8243	33.9751	34.0563	34.2071	AAEL001593-PB,AAEL001593-PA,AAEL001593-PC	AAEL001593-PB,AAEL001593-PA,AAEL001593-PC	AAEL001593-PC	AAEL001593-PC	AAEL001593-PC	AAEL001593-PC	glycerol-3-phosphate dehydrogenase protein_coding supercont1.36:2657332-2706248:1 gene:AAEL001593	38748	6.49
25934	989.484	14.74	14.75	51.3748			1871	1769					3276	3329	2716		1253	4	ADIDATVER		PEP_FRAG_1	575	583	b2b5y4y6y7y8	6	7.4553	7.4553	0	5	5	989.482	1309	2	2	0.2056	14.6941	14.5414	14.6664	14.7339	14.8589	AAEL011641-PA	AAEL011641-PA	AAEL011641-PA	AAEL011641-PA	AAEL011641-PA	AAEL011641-PA	transferrin protein_coding supercont1.596:610286-617685:-1 gene:AAEL011641	87251	4.8
25974	989.554	36.1	36.11	53.3066	4000	3883	3453	3545		1732	4754	4246						1	IPMFVVQR		PEP_FRAG_1	516	523	b2y2y3y4y5y6y7	7	6.9004	6.9004	0.0005	5	5	989.556	3580	2	2	0.2141	36.1704	35.9782	36.1343	36.2185	36.3746	AAEL009142-PA	AAEL009142-PA	AAEL009142-PA	AAEL009142-PA	AAEL009142-PA	AAEL009142-PA	prolyl endopeptidase (prolyl oligopeptidase) protein_coding supercont1.372:743438-766744:1 gene:AAEL009142	88871.4	6.24
26000	989.572	39.37	39.33	55.1015	11377	11055	4189	4063	5653	5455	11886	12612	2340			2445	2603	8	VFLENVIR		PEP_FRAG_1	61	68	b2b3b6b8y2y5y6y7y8	9	7.5132	7.5132	0	10	10	989.573	22564	1.94	2	0.2149	39.5078	39.3088	39.4669	39.5521	39.7101	AAEL003823-PA,AAEL003833-PA,AAEL003846-PA,AAEL003863-PA,AAEL011999-PA,AAEL013709-PA,AAEL000490-PA,AAEL000501-PA,AAEL000513-PA,AAEL003673-PA,AAEL003689-PA,AAEL003814-PA,AAEL003838-PA,AAEL003866-PA,AAEL000517-PA	AAEL003823-PA,AAEL003833-PA,AAEL003846-PA,AAEL003863-PA,AAEL011999-PA,AAEL013709-PA,AAEL000490-PA,AAEL000501-PA,AAEL000513-PA,AAEL003673-PA,AAEL003689-PA,AAEL003814-PA,AAEL003838-PA,AAEL003866-PA,AAEL000517-PA	AAEL000490-PA	AAEL000490-PA	AAEL000490-PA	AAEL000490-PA	histone H4 protein_coding supercont1.9:3668611-3668922:1 gene:AAEL000490	11381.4	11.77
26012	990.501	34.88	34.91	52.078											4216	1204	1419	13	FASYFLSR		PEP_FRAG_1	234	241	y6y7	2	6.134	6.134	0.0038	3	3	990.501	1408	2	2	0.2553	34.8726	34.6632	34.8324	34.9236	35.0929	AAEL010521-PA,AAEL010521-PB,AAEL015572-PA	AAEL010521-PA,AAEL010521-PB,AAEL015572-PA	AAEL015572-PA	AAEL015572-PA	AAEL015572-PA	AAEL015572-PA	ribophorin ii protein_coding supercont1.3417:4288-6012:1 gene:AAEL015572	55114.9	9.09
26019	990.519	43.85	43.85	138.697							14398							7	ELDELMLK		PEP_FRAG_1	89	96	b5b7b8y4y8	5	6.5995	7.4603	0	1	7	990.519	14398	1.03	1	0.363	43.8454	43.6664	43.8068	43.8825	44.023	AAEL001668-PA	AAEL001668-PA	AAEL001668-PA	AAEL001668-PA	AAEL001668-PA	AAEL001668-PA	enolase protein_coding supercont1.38:1462458-1464130:1 gene:AAEL001668	46906.5	6.29
26028	990.516	37.04	37.09	52.9894	8790	8595	5518	6545		2304					4431		1376	2	ELDELMLK		PEP_FRAG_1	89	96	b3b4b4°b6y2y3y4y6y8	9	7.4603	7.4603	0	6	7	990.518	8189	1.75	2	0.2614	36.9718	36.7861	36.9257	37.0009	37.1404	AAEL001668-PA	AAEL001668-PA	AAEL001668-PA	AAEL001668-PA	AAEL001668-PA	AAEL001668-PA	enolase protein_coding supercont1.38:1462458-1464130:1 gene:AAEL001668	46906.5	6.29
26060	990.592	26.04	26.02	55.5218			7294	7178		6573			12094			6613	6686	4	LIFDNLKK		PEP_FRAG_1	780	787	b2y2y5y6	4	7.6872	7.6872	0	5	5	990.592	6345	2	2	0.3317	25.9441	25.7377	25.8874	25.9682	26.118	AAEL012062-PA,AAEL012062-PB	AAEL012062-PA,AAEL012062-PB	AAEL012062-PB	AAEL012062-PB	AAEL012062-PB	AAEL012062-PB	Na /K ATPase alpha subunit protein_coding supercont1.650:473391-547252:1 gene:AAEL012062	115852	5.34
26074	991.5	20.97	21	56.3167	11471	10650	5331	5421			9082	8722						8	ACNCLLLK	Carbamidomethyl C(2), Carbamidomethyl C(4)	PEP_FRAG_1	337	344	b2b4b5y1y2y3y4y5y6y6*y7y8	12	7.6644	7.6644	0	5	6	991.5	14020	1.97	2	0.3416	21.1227	20.9271	21.0829	21.1669	21.3227	AAEL001668-PA	AAEL001668-PA	AAEL001668-PA	AAEL001668-PA	AAEL001668-PA	AAEL001668-PA	enolase protein_coding supercont1.38:1462458-1464130:1 gene:AAEL001668	46906.5	6.29
26142	992.523	46.04	46.14	54.222		1478												2	IEFDLDLK		PEP_FRAG_1	274	281	b7y1y6y7°	4	6.1028	7.4494	0	1	4	992.523	1478	2	2	0.2642	46.0434	45.7821	45.9902	46.1024	46.3105	AAEL007765-PA,AAEL007765-PB,AAEL007765-PC,AAEL007765-PD	AAEL007765-PA,AAEL007765-PB,AAEL007765-PC,AAEL007765-PD	AAEL007765-PB	AAEL007765-PB	AAEL007765-PB	AAEL007765-PB	Serine Protease Inhibitor (serpin) likely cleavage at K/R. Transcript A. protein_coding supercont1.279:1261428-1284523:1 gene:AAEL007765	42510	5.43
26143	992.525	46.17	46.13	54.026	1885													1	IEFDLDLK		PEP_FRAG_1	274	281	b2b6b7y1y2y3y4y6y7y8	10	7.4494	7.4494	0	1	4	992.525	1885	1.81	2	0.2459	46.1704	45.923	46.1158	46.2198	46.4126	AAEL007765-PA,AAEL007765-PB,AAEL007765-PC,AAEL007765-PD	AAEL007765-PA,AAEL007765-PB,AAEL007765-PC,AAEL007765-PD	AAEL007765-PB	AAEL007765-PB	AAEL007765-PB	AAEL007765-PB	Serine Protease Inhibitor (serpin) likely cleavage at K/R. Transcript A. protein_coding supercont1.279:1261428-1284523:1 gene:AAEL007765	42510	5.43
26148	992.509	41.03	41.02	52.5866					2309	2339	954					2001	2347	5	IEFDLDLK		PEP_FRAG_2	274	281	b1b3y5y8	4	5.7979	7.4494	0	1	4	992.508	1357	1.73	2	0.3238	41.1065	40.7808	41.0358	41.1733	41.4284	AAEL007765-PA,AAEL007765-PC,AAEL007765-PD,AAEL007765-PB	AAEL007765-PA,AAEL007765-PC,AAEL007765-PD,AAEL007765-PB	AAEL007765-PB	AAEL007765-PB	AAEL007765-PB	AAEL007765-PB	Serine Protease Inhibitor (serpin) likely cleavage at K/R. Transcript A. protein_coding supercont1.279:1261428-1284523:1 gene:AAEL007765	42510	5.43
[truncated: 5,716 more rows]
[truncated: 5 more columns]

## Sheet: PROTEINS BY FRACTIONS SS
VectorBase Gene Stable ID
FRACTION A ONLY (n=1)
AAEL003827
FRACTION B ONLY (n=0)
FRACTION C ONLY (n=19)
AAEL018664
AAEL010884
AAEL009345
AAEL005610
AAEL003606
AAEL013613
AAEL004739
[truncated: 470 more rows]

## Sheet: 115 putative secreted
VectorBase Gene Stable ID		Description	IEP	mw	Max score	Accession	Reported peptides	Sequence coverage	FDR level	Cleavage site (SignalP)	Transmembrane (TMHMM) domain	SupA	SupB	SupC	Total Intensity
[truncated: 122 more rows]

[truncated: 2 more sheets: Salivary enriched proteins, AN. GAMBIAE ORTH 1to1]
